# Supplementary material for: Tandem Mass Tag-Based Quantitative Proteomics Reveals Implication of a Late Embryogenesis Abundant Protein (BnLEA57) in Seed Oil Accumulation in Brassica napus L
Source: Front Plant Sci. 2022 Jun 2;13:907244. doi: 10.3389/fpls.2022.907244 (PMC9201403; doi:10.3389/fpls.2022.907244)
Supplement: Supplementary Table 1 — Lists of identified, quantified, and differentially accumulated Brassica napus proteins between seeds of HOCL and LOCL. [file Table_1.XLSX]

## Sheet: Identified_proteins
Protein FDR Confidence: Combined	Master	Accession	Description	Exp. q-value: Combined	Sum PEP Score	Coverage [%]	# Peptides	# PSMs	# Unique Peptides	# AAs	MW [kDa]	calc. pI	Score MSFragger: MSFragger	Score Sequest HT: Sequest HT	# Peptides (by Search Engine): MSFragger	# Peptides (by Search Engine): Sequest HT	Biological Process	Cellular Component	Molecular Function	Pfam IDs	Entrez Gene ID	Ensembl Gene ID	Gene Symbol	Chromosome	KEGG Pathways	# Protein Pathway Groups	# Razor Peptides	Abundances (Grouped): F1, 126	Abundances (Grouped): F1, 127	Abundances (Grouped): F1, 128	Abundances (Grouped): F1, 129	Abundances (Grouped): F1, 130	Abundances (Grouped): F1, 131	Found in Sample: [S1] F1: 126, Sample	Found in Sample: [S2] F1: 127, Sample	Found in Sample: [S3] F1: 128, Sample	Found in Sample: [S4] F1: 129, Sample	Found in Sample: [S5] F1: 130, Sample	Found in Sample: [S6] F1: 131, Sample	# Protein Groups	Modifications
High	Master Protein	A0A078JKG1	Phosphopyruvate hydratase OS=Brassica napus OX=3708 GN=BnaAnng21140D PE=3 SV=1	0	293.157	57	16	241	3	429	46.1	5.54	1381	407.35	16	13	metabolic process		catalytic activity;metal ion binding	Pf00113, Pf03952		GSBRNA2T00048341001				0	14	3.78815e+08	4.12433e+08	3.30543e+08	3.15361e+08	3.87623e+08	4.10225e+08	High	High	High	High	High	High	1
High	Master Protein	A0A078H5M7	Phosphopyruvate hydratase OS=Brassica napus OX=3708 GN=BnaC04g08780D PE=3 SV=1	0	283.813	54	15	232	2	429	46.1	5.54	1364	392	15	13	metabolic process		catalytic activity;metal ion binding	Pf00113, Pf03952		GSBRNA2T00053878001; GSBRNA2T00117059001				0	0	2.72764e+06	2.73177e+06	2.12466e+06	2.03413e+06	2.57065e+06	2.95051e+06	High	High	High	High	High	High	1
High	Master Protein	D1L8P5	ATP synthase subunit beta OS=Brassica napus OX=3708 GN=atpB PE=3 SV=1	0	283.227	33	12	163	12	498	53.7	5.26	877	232.22	12	12	metabolic process;transport	membrane	catalytic activity;nucleotide binding;transporter activity	Pf00006, Pf00306, Pf02874	11542072		atpB		Oxidative phosphorylation; Photosynthesis; Metabolic pathways	3	0	5.07502e+07	5.3749e+07	4.27142e+07	4.29687e+07	5.25819e+07	5.47551e+07	High	High	High	High	High	High	1
High	Master Protein	A0A078F3G8	BnaC03g35820D protein OS=Brassica napus OX=3708 GN=BnaC03g35820D PE=4 SV=1	0	275.913	40	27	169	2	809	89.5	5.22	690	229.03	27	24	metabolic process;response to stimulus		catalytic activity;nucleotide binding;RNA binding	Pf00004, Pf00910, Pf01057, Pf01078, Pf02359, Pf02933, Pf05496, Pf06068, Pf07724, Pf07728, Pf13191, Pf13207, Pf13238, Pf13401		GSBRNA2T00125146001				0	0	1.55291e+06	1.50788e+06	1.20911e+06	1.39075e+06	1.65665e+06	1.73731e+06	High	High	High	High	High	High	1
High	Master Protein	A0A078IE55	BnaA05g10730D protein OS=Brassica napus OX=3708 GN=BnaA05g10730D PE=4 SV=1	0	262.078	36	44	120	17	1235	137.7	4.82	464	153.05	43	39	transport	membrane	catalytic activity;motor activity;transporter activity	Pf01496, Pf01576, Pf05622, Pf12128, Pf13166		GSBRNA2T00089159001				0	27	4.58498e+07	4.39967e+07	3.54614e+07	3.78675e+07	4.4972e+07	4.93153e+07	High	High	High	High	High	High	1
High	Master Protein	Q71SX0	Ribulose bisphosphate carboxylase large chain OS=Brassica napus OX=3708 GN=rbcL PE=3 SV=1	0	258.377	40	20	572	1	479	52.9	6.29	2122	583.68	19	19	metabolic process		catalytic activity;metal ion binding	Pf00016, Pf02788	11542073		rbcL		Glyoxylate and dicarboxylate metabolism; Carbon fixation in photosynthetic organisms; Carbon metabolism; Metabolic pathways	4	0	714367	747040	572231	813208	945922	970128	High	High	High	High	High	High	1
High	Master Protein	A0A075M3M5	Ribulose bisphosphate carboxylase large chain (Fragment) OS=Brassica napus OX=3708 GN=rbcL PE=3 SV=1	0	256.005	39	20	587	1	466	51.5	6.48	2150	597.65	19	19	metabolic process		catalytic activity;metal ion binding	Pf00016, Pf02788						0	26	8.19671e+08	8.59488e+08	7.51602e+08	7.1522e+08	8.07955e+08	8.50486e+08	High	High	High	High	High	High	1
High	Master Protein	A0A078HUE0	BnaA01g32030D protein OS=Brassica napus OX=3708 GN=BnaA01g32030D PE=4 SV=1	0	250.609	40	27	163	1	810	89.5	5.2	632	208.67	27	24	metabolic process;response to stimulus		catalytic activity;nucleotide binding;RNA binding	Pf00004, Pf00910, Pf01057, Pf01078, Pf02359, Pf02933, Pf05496, Pf06068, Pf07724, Pf07728, Pf13191, Pf13207, Pf13238, Pf13401		GSBRNA2T00072864001				0	0	73371.8	70610.5	59445.6	57073.9	70306.6	75512.4	High	High	High	High	High	High	1
High	Master Protein	O48563	Heat shock cognate protein HSC70 OS=Brassica napus OX=3708 GN=Hsc70 PE=2 SV=1	0	250.294	41	21	232	5	645	70.7	5.19	1029	265.27	21	17	cell organization and biogenesis		nucleotide binding	Pf00012, Pf06723	106361615		LOC106361615	C4	Endocytosis; Spliceosome; Protein processing in endoplasmic reticulum	3	23	1.56835e+08	1.65993e+08	1.31588e+08	1.31455e+08	1.528e+08	1.66196e+08	High	High	High	High	High	High	1
High	Master Protein	A0A078IR15	Phosphoenolpyruvate carboxylase OS=Brassica napus OX=3708 GN=BnaC04g02430D PE=3 SV=1	0	249.544	32	28	166	1	964	109.9	5.96	662	227.92	28	28	metabolic process		catalytic activity	Pf00311	106391948	GSBRNA2T00003606001	LOC106391948	C4	Pyruvate metabolism; Carbon fixation in photosynthetic organisms; Carbon metabolism; Metabolic pathways	4	33	1.07621e+08	1.09988e+08	9.63927e+07	9.79994e+07	1.0892e+08	1.18307e+08	High	High	High	High	High	High	1
High	Master Protein	A0A078IX51	BnaA05g28710D protein OS=Brassica napus OX=3708 GN=BnaA05g28710D PE=4 SV=1	0	248.788	40	27	163	1	808	89.5	5.2	626	208.09	27	24	metabolic process;response to stimulus		catalytic activity;nucleotide binding;RNA binding	Pf00004, Pf00910, Pf01057, Pf01078, Pf02359, Pf02933, Pf05496, Pf06068, Pf07724, Pf07728, Pf13191, Pf13207, Pf13238, Pf13401		GSBRNA2T00014354001				0	27	1.27344e+08	1.24465e+08	1.07219e+08	1.14166e+08	1.36089e+08	1.44014e+08	High	High	High	High	High	High	1
High	Master Protein	A0A078FPP9	Phosphoenolpyruvate carboxylase OS=Brassica napus OX=3708 GN=BnaC04g48440D PE=3 SV=1	0	248.499	32	28	165	1	964	109.8	6.07	660	227.92	27	28	metabolic process		catalytic activity	Pf00311		GSBRNA2T00084729001				0	0							Not Found	Not Found	High	High	Not Found	Not Found	1
High	Master Protein	P21241	RuBisCO large subunit-binding protein subunit beta, chloroplastic OS=Brassica napus OX=3708 PE=2 SV=1	0	248.415	41	19	127	3	588	62.4	6.93	689	195.83	19	17	metabolic process	cytoplasm	nucleotide binding	Pf00118	106360356		LOC106360356	C3		0	18	8.21153e+07	9.12446e+07	6.61931e+07	6.65083e+07	8.10532e+07	8.71419e+07	High	High	High	High	High	High	1
High	Master Protein	C7FAZ0	Acetyl-CoA carboxytransferase OS=Brassica napus OX=3708 GN=accA1-2 PE=3 SV=1	0	242.849	39	26	145	4	769	85.3	5.88	683	219.79	25	25	metabolic process		catalytic activity	Pf03255	106451057		LOC106451057	A3		0	24	7.58812e+07	7.75974e+07	6.40234e+07	7.18922e+07	8.59819e+07	8.87572e+07	High	High	High	High	High	High	1
High	Master Protein	A0A078HMI0	Protein disulfide-isomerase OS=Brassica napus OX=3708 GN=BnaC08g19950D PE=3 SV=1	0	235.812	45	22	307	18	500	55.7	4.94	1296	355.41	21	22	cellular homeostasis;regulation of biological process	endoplasmic reticulum	catalytic activity	Pf00085, Pf13098, Pf13848, Pf13899, Pf13905	106431998	GSBRNA2T00066638001	LOC106431998	C8	Protein processing in endoplasmic reticulum	1	4	3.81063e+08	4.07369e+08	3.39234e+08	3.38059e+08	3.81099e+08	4.08719e+08	High	High	High	High	High	High	1
High	Master Protein	A0A078HEV4	Clathrin heavy chain OS=Brassica napus OX=3708 GN=BnaA01g31170D PE=3 SV=1	0	234.169	16	26	123	4	1680	189.9	5.39	547	173.44	26	25	cell organization and biogenesis;transport	membrane	protein binding;structural molecule activity	Pf00637, Pf01394, Pf09268, Pf13838		GSBRNA2T00060276001				0	22	4.68465e+07	4.85749e+07	4.41569e+07	4.49123e+07	5.11537e+07	5.59719e+07	High	High	High	High	High	High	1
High	Master Protein	C0LLV7	Acetyl-CoA carboxytransferase OS=Brassica napus OX=3708 GN=accA2 PE=3 SV=1	0	233.25	36	25	149	4	769	85.3	5.76	678	220.43	24	24	metabolic process;regulation of biological process		catalytic activity	Pf03255, Pf10186	106354759		LOC106354759	C4		0	0	4.83886e+06	4.83374e+06	4.14532e+06	4.47872e+06	5.22554e+06	5.48178e+06	High	High	High	High	High	High	1
High	Master Protein	A0A078FCX6	BnaC04g12550D protein OS=Brassica napus OX=3708 GN=BnaC04g12550D PE=4 SV=1	0	232.234	28	38	121	11	1404	157	4.82	429	152.6	37	36		membrane	catalytic activity;motor activity	Pf01576, Pf12128, Pf13166		GSBRNA2T00061253001				0	0	1.47054e+07	1.44959e+07	1.21311e+07	1.34109e+07	1.54891e+07	1.71512e+07	High	High	High	High	High	High	1
High	Master Protein	A0A078HU02	Pyruvate kinase OS=Brassica napus OX=3708 GN=BnaC01g31270D PE=3 SV=1	0	222.855	36	16	167	2	577	63.3	6.37	804	244.89	16	12	metabolic process		catalytic activity;metal ion binding	Pf00224, Pf02887, Pf03328	106453758	GSBRNA2T00071764001	LOC106453758	C1	Biosynthesis of secondary metabolites; Biosynthesis of amino acids; Metabolic pathways; Pyruvate metabolism; Carbon metabolism; Purine metabolism; Glycolysis / Gluconeogenesis	7	0	3.13275e+06	3.30009e+06	2761410	3.10796e+06	3.38232e+06	3.62427e+06	High	High	High	High	High	High	1
High	Master Protein	A0A078HDH4	Pyruvate kinase OS=Brassica napus OX=3708 GN=BnaA01g24280D PE=3 SV=1	0	216.138	36	16	177	2	577	63.2	6.04	848	257.93	16	12	metabolic process		catalytic activity;metal ion binding	Pf00224, Pf02887, Pf03328	106453663	GSBRNA2T00058515001	LOC106453663	A1	Biosynthesis of secondary metabolites; Biosynthesis of amino acids; Metabolic pathways; Pyruvate metabolism; Carbon metabolism; Purine metabolism; Glycolysis / Gluconeogenesis	7	18	6.08824e+07	6.42876e+07	5.21143e+07	5.9166e+07	6.81048e+07	7.17791e+07	High	High	High	High	High	High	1
High	Master Protein	A0A078HVX3	Acetyl-CoA carboxylase OS=Brassica napus OX=3708 GN=BnaA08g06180D PE=4 SV=1	0	215.438	17	31	120	6	2233	248.8	6.28	520	171.51	31	28	metabolic process		catalytic activity;metal ion binding;nucleotide binding	Pf00289, Pf00364, Pf01039, Pf02655, Pf02785, Pf02786, Pf07478, Pf08326, Pf13535, Pf15632		GSBRNA2T00073846001				0	26	3.01866e+07	3.14553e+07	2.64282e+07	2.79637e+07	3.12438e+07	3.42197e+07	High	High	High	High	High	High	1
High	Master Protein	A0A078F191	BnaA05g13740D protein OS=Brassica napus OX=3708 GN=BnaA05g13740D PE=3 SV=1	0	211.228	40	18	117	1	600	63.8	6.38	594	181.33	18	16	metabolic process	cytoplasm	nucleotide binding	Pf00118	106361248	GSBRNA2T00125571001	LOC106361248	A5	RNA degradation	1	0	961259	1.08062e+06	812335	683464	814083	1011905	High	High	High	High	High	High	1
High	Master Protein	A0A078GI33	BnaC06g10960D protein OS=Brassica napus OX=3708 GN=BnaC06g10960D PE=3 SV=1	0	211.061	38	18	119	1	628	67	7.33	600	185.31	18	16	metabolic process	cytoplasm	nucleotide binding	Pf00118		GSBRNA2T00034728001				0	1	2.35188e+06	2.52258e+06	2.00243e+06	1.75775e+06	2.3382e+06	2.45818e+06	High	High	High	High	High	High	1
High	Master Protein	A0A078JMR1	Pyruvate kinase OS=Brassica napus OX=3708 GN=BnaC02g44850D PE=3 SV=1	0	207.641	38	15	145	6	580	63.5	7.58	637	228.4	15	15	metabolic process		catalytic activity;metal ion binding	Pf00224, Pf02887		GSBRNA2T00055502001				0	12	5.2702e+07	5.49192e+07	4.44739e+07	5.22742e+07	5.97175e+07	6.23408e+07	High	High	High	High	High	High	1
High	Master Protein	A0A0F6WBE5	Putative molecular chaperone binding protein OS=Brassica napus OX=3708 GN=BiP PE=2 SV=1	0	197.273	35	19	205	4	669	73.8	5.19	969	239.74	19	16	cell organization and biogenesis		catalytic activity;nucleotide binding	Pf00012, Pf01968, Pf06723	106345946		LOC106345946	A6	Protein processing in endoplasmic reticulum; Protein export	2	16	1.6089e+08	1.6234e+08	1.36171e+08	1.26647e+08	1.4666e+08	1.57604e+08	High	High	High	High	High	High	1
High	Master Protein	A0A078IKL8	BnaA01g30490D protein OS=Brassica napus OX=3708 GN=BnaA01g30490D PE=3 SV=1	0	197.163	38	20	201	9	650	71.2	5.22	839	185.7	20	16	cell organization and biogenesis		nucleotide binding	Pf00012, Pf06723		GSBRNA2T00096953001				0	0	3.2532e+07	3.49257e+07	2.61955e+07	2.84805e+07	3.1383e+07	3.39211e+07	High	High	High	High	High	High	1
High	Master Protein	A0A078GJN9	Aconitate hydratase OS=Brassica napus OX=3708 GN=BnaA08g14870D PE=3 SV=1	0	196.698	20	16	122	2	922	101.1	6.07	556	134.97	16	14	metabolic process		catalytic activity;metal ion binding	Pf00330, Pf00694		GSBRNA2T00027294001				0	17	1.20201e+08	1.24276e+08	1.11051e+08	1.14557e+08	1.26507e+08	1.33481e+08	High	High	High	High	High	High	1
High	Master Protein	A0A078F4J2	Clathrin heavy chain OS=Brassica napus OX=3708 GN=BnaC03g35690D PE=3 SV=1	0	192.561	13	20	113	4	1675	189.4	5.31	505	143.76	20	19	cell organization and biogenesis;transport	membrane	protein binding;structural molecule activity	Pf00637, Pf01394, Pf09268, Pf13838		GSBRNA2T00125164001				0	3	8.67772e+06	8.85372e+06	7.57521e+06	8.48711e+06	9.36809e+06	9.95781e+06	High	High	High	High	High	High	1
High	Master Protein	A0A078I4C3	Alpha-1,4 glucan phosphorylase OS=Brassica napus OX=3708 GN=BnaA02g29830D PE=3 SV=1	0	191.596	27	21	98	21	933	105.2	6.02	433	145.29	21	20	metabolic process		catalytic activity	Pf00343	106371101	GSBRNA2T00080067001	LOC106371101	A2	Starch and sucrose metabolism; Metabolic pathways; Biosynthesis of secondary metabolites	3	0	3.82833e+07	4.12366e+07	3.11358e+07	3.47857e+07	3.99772e+07	4.24368e+07	High	High	High	High	High	High	1
High	Master Protein	A0A078HLV6	Protein disulfide-isomerase OS=Brassica napus OX=3708 GN=BnaA02g18370D PE=3 SV=1	0	190.374	47	21	132	4	511	56.2	5.06	582	175.67	20	19	cellular homeostasis;regulation of biological process	endoplasmic reticulum	catalytic activity	Pf00085, Pf13098, Pf13848, Pf13899, Pf13905		GSBRNA2T00065747001				0	18	9.4755e+07	1.05331e+08	8.06347e+07	9.8807e+07	1.12281e+08	1.21041e+08	High	High	High	High	High	High	1
High	Master Protein	A0A078FNM0	Acetyl-CoA carboxytransferase OS=Brassica napus OX=3708 GN=BnaC03g21010D PE=3 SV=1	0	189.489	26	19	112	2	764	84.7	5.94	529	169.65	19	19	metabolic process		catalytic activity	Pf01039, Pf03255	106427748	GSBRNA2T00079181001	LOC106427748	C3		0	7	7.72594e+06	7.79885e+06	6.37454e+06	7.24647e+06	8.83387e+06	9.41875e+06	High	High	High	High	High	High	1
High	Master Protein	A0A078IUR8	Ribonuclease OS=Brassica napus OX=3708 GN=BnaAnng13680D PE=4 SV=1	0	189.382	25	20	109	3	1000	108.8	7.11	445	154.58	20	18	regulation of biological process			Pf00565, Pf00567		GSBRNA2T00016472001				0	19	5.55286e+07	5.64714e+07	4.83768e+07	5.32645e+07	6.15897e+07	6.58781e+07	High	High	High	High	High	High	1
High	Master Protein	A0A078F689	Clathrin heavy chain OS=Brassica napus OX=3708 GN=BnaA05g27850D PE=3 SV=1	0	188.55	14	20	107	4	1545	174.8	5.36	443	149.09	20	20	cell organization and biogenesis;transport	membrane	protein binding;structural molecule activity	Pf00637, Pf01394, Pf09268, Pf13838		GSBRNA2T00000331001				0	0	5.03707e+06	5.40586e+06	4.76557e+06	4.97086e+06	5.56979e+06	5.64789e+06	High	High	High	High	High	High	1
High	Master Protein	A0A078GIF8	BnaC02g40260D protein OS=Brassica napus OX=3708 GN=BnaC02g40260D PE=3 SV=1	0	188.404	23	19	214	6	838	93.6	6.51	779	220.04	19	17			catalytic activity;nucleotide binding	Pf00009, Pf00679, Pf03144, Pf03764, Pf14492		GSBRNA2T00028785001				0	17	1.60688e+08	1.65975e+08	1.34416e+08	1.34574e+08	1.59178e+08	1.77792e+08	High	High	High	High	High	High	1
High	Master Protein	Q39324	11S globulin (Fragment) OS=Brassica napus OX=3708 PE=2 SV=1	0	188.382	45	15	481	1	506	56	7.17	2417	337.77	15	12				Pf00190, Pf07883	106400904		LOC106400904	A1		0	18	2.39182e+08	2.83391e+08	2.70945e+08	3.35619e+08	3.67189e+08	3.52722e+08	High	High	High	High	High	High	1
High	Master Protein	A0A078D911	BnaC03g17190D protein OS=Brassica napus OX=3708 GN=BnaC03g17190D PE=3 SV=1	0	183.604	34	16	160	2	642	70.5	5.15	834	190.91	16	13	cell organization and biogenesis		catalytic activity;nucleotide binding	Pf00012, Pf01968, Pf06723		GSBRNA2T00142110001; GSBRNA2T00024484001				0	0	2.66774e+06	3.08323e+06	2.48945e+06	2.39703e+06	3.05152e+06	3.29496e+06	High	High	High	High	High	High	1
High	Master Protein	A0A078HUH6	BnaA04g20940D protein OS=Brassica napus OX=3708 GN=BnaA04g20940D PE=4 SV=1	0	182.946	25	18	175	5	787	87.2	5.95	680	178.33	18	14			catalytic activity;nucleotide binding	Pf00009, Pf00679, Pf03144, Pf03764, Pf14492		GSBRNA2T00069636001				0	0	1.43735e+07	1.4515e+07	1.17961e+07	1.26105e+07	1.49573e+07	1.66435e+07	High	High	High	High	High	High	1
High	Master Protein	P21239	RuBisCO large subunit-binding protein subunit alpha, chloroplastic (Fragment) OS=Brassica napus OX=3708 PE=2 SV=2	0	182.834	37	16	122	3	546	57.7	4.93	569	169.61	16	15	metabolic process	cytoplasm	nucleotide binding	Pf00118	106423897		LOC106423897	C4		0	14	6.96531e+07	7.48468e+07	5.26255e+07	5.52639e+07	6.65927e+07	7.01037e+07	High	High	High	High	High	High	1
High	Master Protein	A0A078FP03	Ribonuclease OS=Brassica napus OX=3708 GN=BnaC02g01650D PE=4 SV=1	0	182.437	24	19	103	2	1010	110.4	6.96	424	145.82	19	17	regulation of biological process			Pf00565, Pf00567		GSBRNA2T00078576001				0	0	483205	469747	383296	502359	517540	591886	High	High	High	High	High	High	1
High	Master Protein	A0A078HV91	Aconitate hydratase OS=Brassica napus OX=3708 GN=BnaC03g62580D PE=3 SV=1	0	182.037	21	15	99	1	905	98.9	5.95	468	125.64	15	13	metabolic process		catalytic activity;metal ion binding	Pf00330, Pf00694		GSBRNA2T00073281001				0	0	2.22048e+06	2.49261e+06	1.94546e+06	1.39372e+06	2.55283e+06	2.12069e+06	High	High	High	High	High	High	1
High	Master Protein	C7FAY9	Acetyl-CoA carboxytransferase OS=Brassica napus OX=3708 GN=accA2-2 PE=3 SV=1	0	178.441	25	18	110	2	765	85	5.69	515	162.36	18	18	metabolic process		catalytic activity	Pf01039, Pf03255	106438168		LOC106441891; LOC106438168	A3		0	0	1.99654e+06	2.13887e+06	1.75888e+06	1.97644e+06	2590456	2.69633e+06	High	High	High	High	High	High	1
High	Master Protein	A0A078I4J7	BnaC03g16230D protein OS=Brassica napus OX=3708 GN=BnaC03g16230D PE=3 SV=1	0	175.996	26	23	101	8	921	102	7.18	358	131.68	22	22	metabolic process		catalytic activity;nucleotide binding;protein binding;RNA binding	Pf00004, Pf00910, Pf02151, Pf02861, Pf07724, Pf07728, Pf10431, Pf13177, Pf13191, Pf13401		GSBRNA2T00082732001				0	16	8.74906e+07	9.31177e+07	7.29129e+07	7.83054e+07	9.31651e+07	1.02957e+08	High	High	High	High	High	High	1
High	Master Protein	A0A078J8W8	BnaC07g48050D protein OS=Brassica napus OX=3708 GN=BnaC07g48050D PE=3 SV=1	0	175.403	34	16	157	1	642	70.6	5.19	815	185.56	16	13	cell organization and biogenesis		catalytic activity;nucleotide binding	Pf00012, Pf01968, Pf06723		GSBRNA2T00039340001				0	0	77390.3	81560.1	47064.3	67874.4	78652	76162	High	High	High	High	High	High	1
High	Master Protein	Q9FEH8	Acetyl-CoA carboxylase (Fragment) OS=Brassica napus OX=3708 GN=acc2.1 PE=4 SV=1	0	174.995	16	24	91	1	1798	200.3	6.48	417	134.08	24	23	metabolic process		catalytic activity;metal ion binding;nucleotide binding	Pf00289, Pf00364, Pf01039, Pf02785, Pf02786, Pf07478, Pf08326, Pf13535, Pf15632	106413885		LOC106413885	C8		0	0	741054	699042	684024	635391	773766	851025	High	High	High	High	High	High	1
High	Master Protein	A0A078G839	Leucyl-tRNA synthetase OS=Brassica napus OX=3708 GN=BnaC08g42640D PE=3 SV=1	0	174.357	24	21	62	15	1211	136.7	6.49	314	102.3	21	19	metabolic process;regulation of biological process	cytoplasm	catalytic activity;nucleotide binding	Pf00133, Pf01406, Pf08264, Pf09334		GSBRNA2T00019299001				0	6	2.07234e+07	2.13126e+07	1.74063e+07	1.88268e+07	2.16305e+07	2.39832e+07	High	High	High	High	High	High	1
High	Master Protein	A0A078HVT2	Protein disulfide-isomerase OS=Brassica napus OX=3708 GN=BnaCnng09890D PE=3 SV=1	0	173.357	44	20	126	3	510	55.9	5.14	545	163.85	19	18	cellular homeostasis;regulation of biological process	endoplasmic reticulum	catalytic activity	Pf00085, Pf13098, Pf13848, Pf13899, Pf13905		GSBRNA2T00071937001				0	0	4.64562e+06	5.32608e+06	3.32614e+06	5.05563e+06	6.22678e+06	6.55305e+06	High	High	High	High	High	High	1
High	Master Protein	A0A078FIJ5	BnaC03g13440D protein OS=Brassica napus OX=3708 GN=BnaC03g13440D PE=3 SV=1	0	169.187	35	18	104	1	595	62.9	5.74	502	156.21	18	14	metabolic process	cytoplasm	nucleotide binding	Pf00118		GSBRNA2T00060762001				0	0	1.17418e+06	1.22314e+06	935942	1.06823e+06	1.1283e+06	1.31965e+06	High	High	High	High	High	High	1
High	Master Protein	A0A078J319	V-ATPase 69 kDa subunit OS=Brassica napus OX=3708 GN=BnaA07g38430D PE=3 SV=1	0	168.982	34	18	100	18	623	68.6	5.29	437	144.62	18	17	metabolic process;transport		catalytic activity;nucleotide binding;transporter activity	Pf00006, Pf00306, Pf02874	106353430; 106405672	GSBRNA2T00131919001; GSBRNA2T00022872001	LOC106353430; LOC106405672	A7; C6	Metabolic pathways; Oxidative phosphorylation; Phagosome	3	0	3.96939e+07	4.49935e+07	3.64385e+07	3.10209e+07	3.85075e+07	3.96571e+07	High	High	High	High	High	High	1
High	Master Protein	A0A078F5F6	Phenylalanine ammonia-lyase OS=Brassica napus OX=3708 GN=BnaA05g28470D PE=3 SV=1	0	168.812	31	18	141	15	706	76.7	6.14	597	180.89	17	17	metabolic process	cytoplasm	catalytic activity	Pf00221	106377171	GSBRNA2T00000405001	LOC106377171		Phenylpropanoid biosynthesis; Metabolic pathways; Biosynthesis of secondary metabolites; Phenylalanine metabolism	4	3	7.37219e+07	7.51521e+07	6.87889e+07	6.3525e+07	7.49064e+07	7.61461e+07	High	High	High	High	High	High	1
High	Master Protein	A0A078FG48	BnaC03g13930D protein OS=Brassica napus OX=3708 GN=BnaC03g13930D PE=3 SV=1	0	168.506	31	17	132	2	576	66.2	5.05	535	153.76	17	15	metabolic process;response to stimulus		nucleotide binding;protein binding	Pf00183, Pf02518, Pf13589		GSBRNA2T00060816001				0	17	1.14028e+08	1.20216e+08	9.78674e+07	1.0162e+08	1.18854e+08	1.2854e+08	High	High	High	High	High	High	1
High	Master Protein	A0A078GXL0	BnaC03g47010D protein OS=Brassica napus OX=3708 GN=BnaC03g47010D PE=3 SV=1	0	167.132	30	15	116	2	586	61.8	5.11	524	148.15	15	14	metabolic process	cytoplasm	nucleotide binding	Pf00118		GSBRNA2T00047309001				0	0	7.64481e+06	8200678	6.25588e+06	6.1354e+06	7.36184e+06	7.70471e+06	High	High	High	High	High	High	1
High	Master Protein	P29108	Stearoyl-[acyl-carrier-protein] 9-desaturase, chloroplastic OS=Brassica napus OX=3708 PE=2 SV=1	0	166.388	35	11	184	3	398	45.3	6.07	821	275.07	11	9	metabolic process		catalytic activity;metal ion binding	Pf03405	106388339	GSBRNA2T00139042001	LOC106388339	A3	Fatty acid biosynthesis; Fatty acid metabolism; Biosynthesis of unsaturated fatty acids	3	0	1.8534e+07	1.887e+07	1.48018e+07	1.5344e+07	1.90331e+07	1.9151e+07	High	High	High	High	High	High	1
High	Master Protein	A0A078HL31	11S globulin OS=Brassica napus OX=3708 GN=BnaC01g09900D PE=3 SV=1	0	164.81	51	15	462	1	475	52.8	7.74	2224	333.28	14	13				Pf00190, Pf07883		GSBRNA2T00065804001				0	0							Not Found	Not Found	Not Found	Not Found	Not Found	Not Found	1
High	Master Protein	A0A078HG60	BnaA03g10790D protein OS=Brassica napus OX=3708 GN=BnaA03g10790D PE=3 SV=1	0	159.196	30	16	136	4	575	65.3	4.94	570	161.99	16	14	metabolic process;response to stimulus		nucleotide binding;protein binding	Pf00183, Pf02518, Pf13589		GSBRNA2T00062641001				0	2	4.54866e+07	4.80246e+07	3.84938e+07	3.9215e+07	4.97324e+07	5.29364e+07	High	High	High	High	High	High	1
High	Master Protein	A0A078F345	Isocitrate dehydrogenase [NADP] OS=Brassica napus OX=3708 GN=BnaA07g25510D PE=3 SV=1	0	158.147	30	11	170	2	412	46	6.74	745	251.12	11	11	metabolic process		catalytic activity;metal ion binding;nucleotide binding	Pf00180		GSBRNA2T00124471001				0	13	1.17774e+08	1.22879e+08	1.00407e+08	1.04525e+08	1.22434e+08	1.32478e+08	High	High	High	High	High	High	1
High	Master Protein	A0A078IIQ3	Aconitate hydratase OS=Brassica napus OX=3708 GN=BnaC03g74450D PE=3 SV=1	0	156.7	19	13	79	10	995	108.3	7.03	363	102.44	13	13	metabolic process		catalytic activity;metal ion binding	Pf00330, Pf00694	106426747	GSBRNA2T00097804001	LOC106426747	C3	Carbon metabolism; Citrate cycle (TCA cycle); 2-Oxocarboxylic acid metabolism; Glyoxylate and dicarboxylate metabolism; Biosynthesis of amino acids; Biosynthesis of secondary metabolites; Metabolic pathways	7	0	1.76738e+07	1.78385e+07	1.50394e+07	1.52393e+07	1.7738e+07	1.86987e+07	High	High	High	High	High	High	1
High	Master Protein	A0A078I6S9	BnaC06g06400D protein OS=Brassica napus OX=3708 GN=BnaC06g06400D PE=4 SV=1	0	155.899	21	19	120	7	956	106.2	6.07	467	125.26	19	16	cell organization and biogenesis	membrane	nucleotide binding	Pf00012, Pf02801, Pf06723		GSBRNA2T00081406001				0	14	5.05447e+07	5.23537e+07	4.36944e+07	5.12912e+07	5.86013e+07	6.68359e+07	High	High	High	High	High	High	1
High	Master Protein	A0A078HDW3	Phosphoglycerate mutase (2,3-diphosphoglycerate-independent) OS=Brassica napus OX=3708 GN=BnaA05g29640D PE=3 SV=1	0	155.2	29	13	127	10	560	61	5.85	545	138.97	13	11	metabolic process	cytoplasm	catalytic activity;metal ion binding	Pf01676, Pf06415		GSBRNA2T00059546001				0	3	7.42281e+07	8.04212e+07	6.49575e+07	6.41211e+07	7.71694e+07	8.03924e+07	High	High	High	High	High	High	1
High	Master Protein	A0A078FJE4	Annexin OS=Brassica napus OX=3708 GN=BnaC03g49290D PE=3 SV=1	0	155.075	45	14	149	9	316	36	6.38	546	169.3	14	13			metal ion binding	Pf00191	106433515	GSBRNA2T00079245001	LOC106433515	C3		0	5	1.26333e+08	1.56181e+08	1.01153e+08	1.1088e+08	1.30547e+08	1.52125e+08	High	High	High	High	High	High	1
High	Master Protein	A0A078HHC3	BnaA03g10770D protein OS=Brassica napus OX=3708 GN=BnaA03g10770D PE=3 SV=1	0	152.959	35	18	92	2	607	64.6	6.18	432	134.02	18	14	metabolic process	cytoplasm	nucleotide binding	Pf00118		GSBRNA2T00062643001				0	11	1.65263e+07	1.73605e+07	1.35079e+07	1.39203e+07	1.73904e+07	1.80486e+07	High	High	High	High	High	High	1
High	Master Protein	A0A078FFZ8	Fructose-bisphosphate aldolase OS=Brassica napus OX=3708 GN=BnaC06g14270D PE=3 SV=1	0	152.619	49	15	164	2	358	38.4	6.65	942	136	15	10	metabolic process		catalytic activity	Pf00274	106452433	GSBRNA2T00071328001; GSBRNA2T00098683001	LOC106452433	A2	Pentose phosphate pathway; Metabolic pathways; Biosynthesis of secondary metabolites; Glycolysis / Gluconeogenesis; Biosynthesis of amino acids; Carbon metabolism; Carbon fixation in photosynthetic organisms; Fructose and mannose metabolism	8	13	1.43839e+08	1.53373e+08	1.33346e+08	1.22087e+08	1.42083e+08	1.51231e+08	High	High	High	High	High	High	1
High	Master Protein	A0A078FLX9	BnaC06g14490D protein OS=Brassica napus OX=3708 GN=BnaC06g14490D PE=4 SV=1	0	151.687	27	19	119	4	810	89.8	5.16	420	158.76	17	19	metabolic process;response to stimulus		catalytic activity;nucleotide binding;RNA binding	Pf00004, Pf00910, Pf01057, Pf01078, Pf02359, Pf02933, Pf05496, Pf06068, Pf07724, Pf07728, Pf13191, Pf13207, Pf13238, Pf13401	106452445	GSBRNA2T00071295001	LOC106452445	C6	Protein processing in endoplasmic reticulum	1	0	5.59221e+06	5.59713e+06	5.55128e+06	5.87837e+06	6.07089e+06	6.70406e+06	High	High	High	High	High	High	1
High	Master Protein	Q96340	Myrosinase-binding protein OS=Brassica napus OX=3708 PE=2 SV=1	0	151.502	18	15	130	8	956	99.4	5.76	652	167.65	14	12				Pf01419						0	7	6.98309e+07	7.29737e+07	6.76626e+07	9.26851e+07	1.18604e+08	1.07501e+08	High	High	High	High	High	High	1
High	Master Protein	A0A078FVI0	Isocitrate dehydrogenase [NADP] OS=Brassica napus OX=3708 GN=BnaA02g12320D PE=3 SV=1	0	150.879	30	11	166	2	412	46	6.74	717	247.11	11	11	metabolic process		catalytic activity;metal ion binding;nucleotide binding	Pf00180	106381331	GSBRNA2T00090983001	LOC106381331	A2	Biosynthesis of secondary metabolites; Citrate cycle (TCA cycle); Glutathione metabolism; Metabolic pathways; Carbon metabolism; 2-Oxocarboxylic acid metabolism; Peroxisome; Biosynthesis of amino acids	8	0	2.8903e+06	3.05705e+06	2.55436e+06	2.6476e+06	3.49297e+06	3.23109e+06	High	High	High	High	High	High	1
High	Master Protein	A0A078H2L0	BnaC09g33020D protein OS=Brassica napus OX=3708 GN=BnaC09g33020D PE=3 SV=1	0	150.796	31	16	97	3	594	62.9	6.04	460	140.53	16	14	metabolic process	cytoplasm	nucleotide binding	Pf00118	106382101; 106437653	GSBRNA2T00052973001	LOC106382101; LOC106437653	C6; C9	RNA degradation	1	0	3.25022e+06	3.34918e+06	2.71432e+06	2.81364e+06	3.37101e+06	3.63759e+06	High	High	High	High	High	High	1
High	Master Protein	A0A078G5R0	BnaC04g36640D protein OS=Brassica napus OX=3708 GN=BnaC04g36640D PE=3 SV=1	0	150.665	39	12	109	3	503	53.9	6.84	612	106.96	12	10	metabolic process		catalytic activity	Pf00171		GSBRNA2T00012213001				0	10	6.30075e+07	6.30822e+07	5.67513e+07	5.77877e+07	6.39653e+07	6.44999e+07	High	High	High	High	High	High	1
High	Master Protein	A0A078H9U1	BnaA01g13670D protein OS=Brassica napus OX=3708 GN=BnaA01g13670D PE=3 SV=1	0	150.532	26	17	114	2	822	94.1	5.03	506	154.85	16	17	metabolic process;response to stimulus		nucleotide binding;protein binding	Pf00183, Pf02518, Pf13589		GSBRNA2T00056293001				0	0	249680	252156	243246	279141	239254	266406	High	High	High	High	High	High	1
High	Master Protein	A0A078JGF6	Plasma membrane ATPase OS=Brassica napus OX=3708 GN=BnaCnng44750D PE=3 SV=1	0	148.723	20	14	71	6	949	104.3	6.76	310	107.72	14	13	metabolic process;transport	membrane	catalytic activity;metal ion binding;nucleotide binding;transporter activity	Pf00122, Pf00690, Pf00702, Pf12710, Pf13246	106441664	GSBRNA2T00042652001	LOC106441664	A9	Oxidative phosphorylation	1	9	2.75021e+07	2.87718e+07	2.41782e+07	2.47546e+07	2.90283e+07	3.03432e+07	High	High	High	High	High	High	1
High	Master Protein	A0A078FDC9	BnaA03g46510D protein OS=Brassica napus OX=3708 GN=BnaA03g46510D PE=3 SV=1	0	147.549	24	17	111	2	871	100.5	5.24	493	152.09	16	17	metabolic process;response to stimulus	membrane	nucleotide binding;protein binding	Pf00183, Pf02518, Pf13589		GSBRNA2T00048937001				0	15	7.92653e+07	8.47546e+07	6.40051e+07	7.01046e+07	7.75515e+07	8.30155e+07	High	High	High	High	High	High	1
High	Master Protein	A0A078JHS9	Plasma membrane ATPase OS=Brassica napus OX=3708 GN=BnaAnng23670D PE=3 SV=1	0	147.247	20	14	66	7	918	100.9	6.65	312	100.71	14	12	metabolic process;transport	membrane	catalytic activity;metal ion binding;nucleotide binding;transporter activity	Pf00122, Pf00690, Pf00702, Pf12710, Pf13246		GSBRNA2T00059649001				0	1	7.94392e+06	8.13824e+06	7.42127e+06	7.17599e+06	8.16519e+06	8.81674e+06	High	High	High	High	High	High	1
High	Master Protein	A0A078GKV7	Xylose isomerase OS=Brassica napus OX=3708 GN=BnaC09g32660D PE=3 SV=1	0	146.722	37	15	90	2	491	55.3	5.87	397	109.4	15	12	metabolic process		catalytic activity;DNA binding;metal ion binding	Pf01261, Pf01719	106401314	GSBRNA2T00033364001	LOC106401314	C9	Metabolic pathways; Pentose and glucuronate interconversions; Fructose and mannose metabolism	3	14	8.59237e+07	9.16653e+07	7.52697e+07	7.34009e+07	8.33181e+07	9.18656e+07	High	High	High	High	High	High	1
High	Master Protein	Q39355	Acyl-[acyl-carrier-protein] desaturase OS=Brassica napus OX=3708 GN=Bn4 PE=3 SV=1	0	143.786	35	11	94	1	401	45.5	6.48	441	121.19	11	9	metabolic process		catalytic activity;metal ion binding	Pf03405		GSBRNA2T00132639001				0	6	2.00461e+07	2.02181e+07	1.59737e+07	1.679e+07	1.91237e+07	2.10928e+07	High	High	High	High	High	High	1
High	Master Protein	A0A078HJ36	5-methyltetrahydropteroyltriglutamate--homocysteine S-methyltransferase OS=Brassica napus OX=3708 GN=BnaA10g16880D PE=3 SV=1	0	143.422	19	14	160	9	765	84.5	6.47	621	161.13	14	14	metabolic process		catalytic activity;metal ion binding	Pf01717, Pf08267		GSBRNA2T00065915001				0	7	3.48952e+08	3.5151e+08	3.05883e+08	2.77743e+08	3.45784e+08	3.49608e+08	High	High	High	High	High	High	1
High	Master Protein	A0A078ICZ9	BnaA03g12250D protein OS=Brassica napus OX=3708 GN=BnaA03g12250D PE=3 SV=1	0	142.268	11	20	47	15	2162	236.4	6.58	219	69.49	20	18	metabolic process		catalytic activity;metal ion binding;nucleotide binding	Pf00070, Pf00310, Pf00890, Pf01262, Pf01266, Pf01493, Pf01593, Pf01645, Pf03486, Pf04898, Pf07992, Pf12831, Pf13450, Pf13738, Pf14691		GSBRNA2T00086695001				0	5	1.0707e+07	1.12608e+07	9.54984e+06	1.07183e+07	1.18194e+07	1.28471e+07	High	High	High	High	High	High	1
High	Master Protein	A0A078JFE6	Fructose-bisphosphate aldolase OS=Brassica napus OX=3708 GN=BnaCnng50220D PE=3 SV=1	0	140.893	49	15	153	1	358	38.5	6.73	859	125.72	15	10	metabolic process		catalytic activity	Pf00274	106389141	GSBRNA2T00126584001; GSBRNA2T00053318001	LOC106389141	C4	Biosynthesis of secondary metabolites; Glycolysis / Gluconeogenesis; Biosynthesis of amino acids; Metabolic pathways; Carbon metabolism; Carbon fixation in photosynthetic organisms; Fructose and mannose metabolism; Pentose phosphate pathway	8	1	3.19854e+06	3.26234e+06	2.6799e+06	2.53972e+06	3.04804e+06	2.98378e+06	High	High	High	High	High	High	1
High	Master Protein	A0A078H5Q9	ATP citrate synthase OS=Brassica napus OX=3708 GN=BnaA02g30820D PE=4 SV=1	0	140.677	21	9	101	1	608	65.7	7.65	442	151.93	9	9	metabolic process		catalytic activity	Pf00285, Pf00549	106403002	GSBRNA2T00055412001	LOC106403002	A2	Metabolic pathways; Biosynthesis of secondary metabolites; Citrate cycle (TCA cycle)	3	11	3.47401e+07	3.55728e+07	3.4208e+07	3.24893e+07	4.06474e+07	4.05527e+07	High	High	High	High	High	High	1
High	Master Protein	A0A078G6X1	BnaA02g08820D protein OS=Brassica napus OX=3708 GN=BnaA02g08820D PE=3 SV=1	0	138.961	30	14	112	4	551	62.6	4.96	453	132.53	14	12	metabolic process;response to stimulus		nucleotide binding;protein binding	Pf00183, Pf02518, Pf13589		GSBRNA2T00012964001				0	0	7.15831e+06	7.93317e+06	6.68874e+06	6.80536e+06	8.32653e+06	8.4677e+06	High	High	High	High	High	High	1
High	Master Protein	A0A078H8X9	BnaA01g19750D protein OS=Brassica napus OX=3708 GN=BnaA01g19750D PE=3 SV=1	0	138.845	33	13	89	3	381	40.4	6.87	449	100.06	12	11	metabolic process;regulation of biological process	membrane	metal ion binding	Pf01716		GSBRNA2T00054097001				0	10	6.88058e+07	7.20917e+07	6.23273e+07	6.73494e+07	8.03856e+07	8.7069e+07	High	High	High	High	High	High	1
High	Master Protein	P34794	RuBisCO large subunit-binding protein subunit alpha, chloroplastic OS=Brassica napus OX=3708 PE=2 SV=1	0	138.731	25	11	92	3	583	61.6	5.24	427	120.97	11	10	metabolic process	cytoplasm	nucleotide binding	Pf00118	106352579		LOC106352579	A7		0	0	2.7234e+06	2.95779e+06	2.2967e+06	2.73784e+06	3.05632e+06	3.21907e+06	High	High	High	High	High	High	1
High	Master Protein	A0A078FZ75	Pyruvate kinase OS=Brassica napus OX=3708 GN=BnaC09g29010D PE=3 SV=1	0	138.715	32	12	100	3	581	63.5	7.8	393	147.98	12	12	metabolic process		catalytic activity;metal ion binding	Pf00224, Pf02887	106412919	GSBRNA2T00009340001	LOC106412919	C9	Metabolic pathways; Carbon metabolism; Pyruvate metabolism; Purine metabolism; Glycolysis / Gluconeogenesis; Biosynthesis of amino acids; Biosynthesis of secondary metabolites	7	0	2.01105e+06	1.98864e+06	1.66634e+06	1.94921e+06	2.42178e+06	2.36164e+06	High	High	High	High	High	High	1
High	Master Protein	A0A078HZM2	BnaC04g25190D protein OS=Brassica napus OX=3708 GN=BnaC04g25190D PE=4 SV=1	0	138.712	19	17	112	5	889	98.6	5.72	420	110.73	17	14	cell organization and biogenesis		nucleotide binding	Pf00012, Pf02801, Pf06723		GSBRNA2T00076393001				0	0	7.09579e+06	7.48441e+06	6.15747e+06	6.94684e+06	8.41692e+06	8.64918e+06	High	High	High	High	High	High	1
High	Master Protein	A0A078I057	Acyl-[acyl-carrier-protein] desaturase OS=Brassica napus OX=3708 GN=BnaC03g24420D PE=3 SV=1	0	138.667	38	12	172	2	399	45.4	6.18	757	254.22	12	9	metabolic process		catalytic activity;metal ion binding	Pf03405		GSBRNA2T00079758001				0	6	9.31554e+07	1.01176e+08	7.46442e+07	7.47857e+07	8.98626e+07	9.77905e+07	High	High	High	High	High	High	1
High	Master Protein	A0A078I6K2	Plasma membrane ATPase OS=Brassica napus OX=3708 GN=BnaC02g42250D PE=3 SV=1	0	137.278	18	13	59	10	962	105.5	6.71	253	93.12	13	13	metabolic process;transport	membrane	catalytic activity;metal ion binding;nucleotide binding;transporter activity	Pf00122, Pf00690, Pf00702, Pf12710, Pf13246		GSBRNA2T00082680001				0	0	5.76925e+06	5.83033e+06	4.91595e+06	5.95363e+06	6.58227e+06	7.08084e+06	High	High	High	High	High	High	1
High	Master Protein	A0A078GA38	ATP synthase subunit beta OS=Brassica napus OX=3708 GN=BnaC09g47340D PE=3 SV=1	0	136.947	29	12	111	1	553	59.5	6.42	480	182.76	12	11	metabolic process;transport		catalytic activity;nucleotide binding;transporter activity	Pf00006, Pf00306, Pf02874		GSBRNA2T00016012001				0	0	16590257	18920352	13610837	13791881	16118082	17304188	High	High	High	High	High	High	1
High	Master Protein	A0A078G0I7	BnaA09g02110D protein OS=Brassica napus OX=3708 GN=BnaA09g02110D PE=3 SV=1	0	136.677	45	10	232	6	188	19.9	7.56	946	289.67	10	10		membrane		Pf01277	106428814	GSBRNA2T00009878001	LOC106428814	A5		0	6	2.7601e+08	3.22394e+08	3.40426e+08	4.37531e+08	4.53024e+08	4.44549e+08	High	High	High	High	High	High	1
High	Master Protein	A0A078IJX9	Xylose isomerase OS=Brassica napus OX=3708 GN=BnaA10g11590D PE=3 SV=1	0	136.57	37	14	88	1	477	53.6	5.86	380	106.62	14	11	metabolic process		catalytic activity;DNA binding;metal ion binding	Pf01261, Pf01719	106361633	GSBRNA2T00093722001	LOC106361633	A9	Metabolic pathways; Pentose and glucuronate interconversions; Fructose and mannose metabolism	3	0	1.49761e+06	1.73043e+06	1.35108e+06	1.35541e+06	1.54193e+06	1.7783e+06	High	High	High	High	High	High	1
High	Master Protein	A0A078FS59	Peptidylprolyl isomerase OS=Brassica napus OX=3708 GN=BnaC03g44640D PE=4 SV=1	0	136.37	32	18	83	2	558	62.1	5.33	345	105.9	18	17	metabolic process		catalytic activity;protein binding	Pf00254, Pf00515, Pf07719, Pf12895, Pf13181, Pf13414, Pf13424, Pf13428, Pf13432, Pf14559		GSBRNA2T00085255001				0	0	378246	356900	296401	277220	370183	319650	High	High	High	High	High	High	1
High	Master Protein	A0A078HSM2	ATP synthase subunit beta OS=Brassica napus OX=3708 GN=BnaAnng05990D PE=3 SV=1	0	136.265	29	12	109	1	555	59.6	6.71	477	182.42	12	11	metabolic process;transport		catalytic activity;nucleotide binding;transporter activity	Pf00006, Pf00306, Pf02874		GSBRNA2T00071631001				0	13	1.19726e+08	1.25338e+08	9.96829e+07	1.01728e+08	1.21763e+08	1.32095e+08	High	High	High	High	High	High	1
High	Master Protein	A0A078IQV6	Peptidylprolyl isomerase OS=Brassica napus OX=3708 GN=BnaA03g57740D PE=4 SV=1	0	132.927	29	18	81	2	558	62.2	5.25	335	104.51	18	17	metabolic process		catalytic activity;protein binding	Pf00254, Pf00515, Pf07719, Pf12895, Pf13181, Pf13414, Pf13424, Pf13428, Pf13432, Pf14559		GSBRNA2T00006688001				0	17	7.81745e+07	8.26479e+07	6.65009e+07	6.35147e+07	7.76709e+07	8.06789e+07	High	High	High	High	High	High	1
High	Master Protein	A0A078JE23	BnaA06g38690D protein OS=Brassica napus OX=3708 GN=BnaA06g38690D PE=3 SV=1	0	132.016	24	19	87	4	822	91.5	5.72	283	108.38	18	19	metabolic process		catalytic activity;nucleotide binding;protein binding	Pf00004, Pf02151, Pf02861, Pf07724, Pf07728, Pf10431, Pf13177, Pf13191, Pf13401		GSBRNA2T00042584001				0	0	7.00942e+06	7.45302e+06	5.68567e+06	6.6363e+06	7.61535e+06	8.2877e+06	High	High	High	High	High	High	1
High	Master Protein	D9J167	Annexin OS=Brassica napus OX=3708 GN=Ann1 PE=2 SV=1	0	130.188	45	15	118	8	317	36.1	5.53	451	115.1	15	14			metal ion binding	Pf00191	106347720		LOC106347720	C2		0	8	1.25526e+08	1.37836e+08	1.05142e+08	1.04368e+08	1.28285e+08	1.35328e+08	High	High	High	High	High	High	1
High	Master Protein	A0A078I1B3	BnaAnng07030D protein OS=Brassica napus OX=3708 GN=BnaAnng07030D PE=3 SV=1	0	129.845	30	17	92	7	535	60.7	4.92	359	126.65	16	16	metabolic process	endoplasmic reticulum;membrane	metal ion binding;protein binding	Pf00262		GSBRNA2T00075578001				0	10	5.50535e+07	5.60041e+07	4.69258e+07	5.1161e+07	6.00027e+07	6.73804e+07	High	High	High	High	High	High	1
High	Master Protein	A1XD61	Phenylalanine ammonia-lyase OS=Brassica napus OX=3708 GN=PAL1-1 PE=2 SV=1	0	126.915	28	16	112	4	722	78.3	6.3	494	122.96	15	10	metabolic process	cytoplasm	catalytic activity	Pf00221	106391500		LOC106391500	A4	Metabolic pathways; Biosynthesis of secondary metabolites; Phenylalanine metabolism; Phenylpropanoid biosynthesis	4	1	21783152	2.18614e+07	1.75994e+07	1.61005e+07	1.88772e+07	2.02397e+07	High	High	High	High	High	High	1
High	Master Protein	A1XD62	Phenylalanine ammonia-lyase OS=Brassica napus OX=3708 GN=PAL1-2 PE=2 SV=1	0	126.616	26	16	105	5	719	78	6.33	478	117.74	15	10	metabolic process	cytoplasm	catalytic activity	Pf00221	106388514		LOC106388514	C7	Phenylpropanoid biosynthesis; Metabolic pathways; Biosynthesis of secondary metabolites; Phenylalanine metabolism	4	10	3.19256e+07	3.25669e+07	2.86801e+07	2.64328e+07	3.18835e+07	3.29876e+07	High	High	High	High	High	High	1
High	Master Protein	A0A078HET1	BnaA06g16950D protein OS=Brassica napus OX=3708 GN=BnaA06g16950D PE=3 SV=1	0	125.721	25	11	63	3	539	58.5	7.72	286	87.99	11	10	metabolic process		catalytic activity	Pf00171		GSBRNA2T00063045001				0	9	5.13222e+07	5.33329e+07	4.19019e+07	4.72114e+07	5.55533e+07	5.78647e+07	High	High	High	High	High	High	1
High	Master Protein	A0A078FV04	BnaA09g05810D protein OS=Brassica napus OX=3708 GN=BnaA09g05810D PE=3 SV=1	0	125.661	32	16	92	3	533	60.7	4.86	352	130.46	16	15	metabolic process	endoplasmic reticulum;membrane	metal ion binding;protein binding	Pf00262		GSBRNA2T00094682001				0	4	1.72697e+07	1.99357e+07	1.76744e+07	1.66791e+07	1.89027e+07	2.40357e+07	High	High	High	High	High	High	1
High	Master Protein	A0A078HZ31	Glyceraldehyde-3-phosphate dehydrogenase OS=Brassica napus OX=3708 GN=BnaC05g47450D PE=3 SV=1	0	124.548	30	8	99	1	353	38.4	7.52	535	167.62	8	8	metabolic process		catalytic activity;nucleotide binding	Pf00044, Pf02800		GSBRNA2T00075637001				0	8	9.27004e+07	9.86189e+07	7.92287e+07	7.71647e+07	9.14276e+07	9.50222e+07	High	High	High	High	High	High	1
High	Master Protein	A0A078GMS5	Plasma membrane ATPase OS=Brassica napus OX=3708 GN=BnaC09g32850D PE=3 SV=1	0	124.511	15	12	59	6	952	104.2	6.7	238	82.48	12	12	metabolic process;transport	membrane	catalytic activity;metal ion binding;nucleotide binding;transporter activity	Pf00122, Pf00690, Pf00702, Pf12710, Pf13246		GSBRNA2T00033394001				0	0	2.99251e+06	2.95027e+06	2.4686e+06	2.55102e+06	2.77305e+06	3.07481e+06	High	High	High	High	High	High	1
High	Master Protein	A0A078J003	BnaA10g28000D protein OS=Brassica napus OX=3708 GN=BnaA10g28000D PE=4 SV=1	0	124.406	22	18	60	3	1003	110.6	5.85	223	81.73	18	16					106368995	GSBRNA2T00014794001	LOC106368995	A10		0	15	9.55444e+06	9.73674e+06	8.64514e+06	8.96984e+06	9.91731e+06	1.08662e+07	High	High	High	High	High	High	1
High	Master Protein	A0A078GHX0	BnaA08g15380D protein OS=Brassica napus OX=3708 GN=BnaA08g15380D PE=4 SV=1	0	123.825	20	8	73	4	554	61.9	5.67	386	135.05	6	8				Pf00190		GSBRNA2T00027218001				0	4	8.90115e+07	1.04862e+08	8.21418e+07	1.04218e+08	1.15155e+08	1.22685e+08	High	High	High	High	High	High	1
High	Master Protein	A0A078HQ07	BnaA04g14130D protein OS=Brassica napus OX=3708 GN=BnaA04g14130D PE=3 SV=1	0	123.818	29	11	111	7	522	54.6	5.68	468	145.26	11	11	metabolic process	cytoplasm	catalytic activity;metal ion binding	Pf00883, Pf02789		GSBRNA2T00068290001				0	7	8.60315e+07	8.77112e+07	7.29728e+07	7.84629e+07	9.14738e+07	9.87601e+07	High	High	High	High	High	High	1
High	Master Protein	A0A078GRR8	Glucose-1-phosphate adenylyltransferase OS=Brassica napus OX=3708 GN=BnaA07g04740D PE=3 SV=1	0	122.961	31	10	59	7	520	57	6.24	290	88.14	10	10	metabolic process		catalytic activity;nucleotide binding	Pf00483, Pf12804	106366674	GSBRNA2T00038740001	LOC106366674	A7	Starch and sucrose metabolism; Metabolic pathways; Biosynthesis of secondary metabolites; Amino sugar and nucleotide sugar metabolism	4	3	1.66228e+07	1.66469e+07	1.30093e+07	1.42878e+07	1.76209e+07	1.83445e+07	High	High	High	High	High	High	1
High	Master Protein	A0A078IR79	CCT-epsilon OS=Brassica napus OX=3708 GN=BnaA07g36780D PE=3 SV=1	0	122.378	31	13	54	13	536	59.5	5.57	224	68.84	13	12	metabolic process	cytoplasm	nucleotide binding;protein binding	Pf00118		GSBRNA2T00003798001				0	0	3.20143e+07	3.4901e+07	2.82256e+07	2.78795e+07	3.4744e+07	3.68257e+07	High	High	High	High	High	High	1
High	Master Protein	A0A078GMV3	BnaA09g46260D protein OS=Brassica napus OX=3708 GN=BnaA09g46260D PE=3 SV=1	0	122.064	31	7	93	2	333	37	6.35	523	161.87	7	7	metabolic process		catalytic activity	Pf00044, Pf01113, Pf01408, Pf02800		GSBRNA2T00035531001				0	0	2061095	2.30337e+06	1.86275e+06	1.87423e+06	2.15589e+06	2.37338e+06	High	High	High	High	High	High	1
High	Master Protein	A0A0B5JHX6	Actin OS=Brassica napus OX=3708 PE=2 SV=1	0	121.343	47	12	133	1	377	41.7	5.49	571	178.97	12	11			nucleotide binding	Pf00022	106419366		LOC106419366	A10		0	0	6.3615e+06	6.58118e+06	5.29575e+06	5.90055e+06	6.80897e+06	7.03283e+06	High	High	High	High	High	High	1
High	Master Protein	A0A078IAN1	BnaA09g12780D protein OS=Brassica napus OX=3708 GN=BnaA09g12780D PE=4 SV=1	0	120.994	28	15	66	7	562	63.5	6.09	280	96.11	15	14			protein binding	Pf00515, Pf07719, Pf13414, Pf13424, Pf13432		GSBRNA2T00086389001				0	9	2.934e+07	2.93469e+07	2.53621e+07	2.80371e+07	3.55231e+07	3.64496e+07	High	High	High	High	High	High	1
High	Master Protein	A0A078G9C9	BnaC09g46850D protein OS=Brassica napus OX=3708 GN=BnaC09g46850D PE=3 SV=1	0	120.869	47	12	124	1	377	41.7	5.49	532	167.44	12	11				Pf00022	106419366; 106426759; 106426760	GSBRNA2T00135952001; GSBRNA2T00016077001	LOC106419366; LOC106426759; LOC106426760	A10; C9		0	13	7.57677e+07	7.7734e+07	6.39876e+07	6.45019e+07	7.57974e+07	8.30357e+07	High	High	High	High	High	High	1
High	Master Protein	A0A078J2V6	BnaA03g55950D protein OS=Brassica napus OX=3708 GN=BnaA03g55950D PE=3 SV=1	0	120.574	27	17	86	4	681	72.7	5.69	309	113.22	16	14	cell organization and biogenesis;metabolic process		nucleotide binding;protein binding	Pf00012, Pf06723		GSBRNA2T00019733001				0	13	5.52892e+07	5.96808e+07	4.45016e+07	4.26694e+07	5.03744e+07	5.52101e+07	High	High	High	High	High	High	1
High	Master Protein	A5HU59	Sinigrinase (Fragment) OS=Brassica napus OX=3708 PE=2 SV=1	0	119.111	31	14	97	2	528	60.7	6.7	423	93.12	14	10	metabolic process		catalytic activity	Pf00232	106382674		LOC106382674	A2		0	12	1.14256e+08	1.20247e+08	1.07591e+08	1.08252e+08	1.07757e+08	1.17343e+08	High	High	High	High	High	High	1
High	Master Protein	A0A078FTH7	BnaA08g28770D protein OS=Brassica napus OX=3708 GN=BnaA08g28770D PE=4 SV=1	0	118.593	18	16	62	4	1013	111.7	5.85	226	90.72	16	15					106362224	GSBRNA2T00089776001	LOC106362224	A8		0	1	2.29988e+06	2.31632e+06	2.20155e+06	1.97381e+06	2.23215e+06	2.42411e+06	High	High	High	High	High	High	1
High	Master Protein	A0A078FF63	BnaC03g13470D protein OS=Brassica napus OX=3708 GN=BnaC03g13470D PE=3 SV=1	0	118.332	25	11	110	1	537	61	4.88	448	133.2	11	9	metabolic process;response to stimulus		nucleotide binding;protein binding	Pf00183, Pf02518, Pf13589		GSBRNA2T00060765001				0	0	1.02208e+06	1.19299e+06	831110	939056	1.19795e+06	1.25193e+06	High	High	High	High	High	High	1
High	Master Protein	A0A078GZY6	BnaC07g16640D protein OS=Brassica napus OX=3708 GN=BnaC07g16640D PE=3 SV=1	0	117.878	36	12	61	2	332	35.1	5.66	333	69.25	11	9	metabolic process;regulation of biological process		metal ion binding	Pf01716	106390380	GSBRNA2T00046185001	LOC106390380	C7	Metabolic pathways; Photosynthesis	2	0	4.8856e+06	5.40067e+06	4.18049e+06	4.46189e+06	5.48958e+06	5.55055e+06	High	High	High	High	High	High	1
High	Master Protein	D8L1X5	Glyceraldehyde-3-phosphate dehydrogenase OS=Brassica napus OX=3708 GN=GAPDH.2 PE=2 SV=1	0	117.639	31	8	125	3	339	36.9	7.93	680	216.12	8	7	metabolic process		catalytic activity;nucleotide binding	Pf00044, Pf01113, Pf01408, Pf02800	106450737		LOC106450737	C5	Metabolic pathways; Carbon metabolism; Carbon fixation in photosynthetic organisms; Glycolysis / Gluconeogenesis; Biosynthesis of amino acids; Biosynthesis of secondary metabolites	6	0	1.08956e+07	1.07939e+07	8.66054e+06	9.7599e+06	1.02574e+07	1.16277e+07	High	High	High	High	High	High	1
High	Master Protein	A0A078JNQ8	Pyrophosphate--fructose 6-phosphate 1-phosphotransferase subunit alpha OS=Brassica napus OX=3708 GN=BnaC05g50320D PE=3 SV=1	0	117.318	26	12	57	12	619	67.5	6.86	261	83.01	11	12	metabolic process	cytoplasm	catalytic activity;metal ion binding;nucleotide binding	Pf00365		GSBRNA2T00058643001				0	0	5.27901e+07	5.50019e+07	4.72194e+07	5.08086e+07	5.80342e+07	6.34869e+07	High	High	High	High	High	High	1
High	Master Protein	A0A078G2D8	BnaC04g11280D protein OS=Brassica napus OX=3708 GN=BnaC04g11280D PE=3 SV=1	0	117.264	27	13	62	4	593	62.9	6.14	266	69.6	13	10	metabolic process	cytoplasm	nucleotide binding	Pf00118		GSBRNA2T00009060001				0	13	1.61615e+07	1.62177e+07	1.36306e+07	1.37566e+07	1.59459e+07	1.71185e+07	High	High	High	High	High	High	1
High	Master Protein	Q9AT81	GF14 omega OS=Brassica napus OX=3708 PE=2 SV=1	0	116.945	49	12	67	7	260	29.1	4.78	276	79.53	12	10			protein binding	Pf00244	106353440		LOC106353440	A7		0	3	1.32311e+07	1.38606e+07	1.13529e+07	1.19041e+07	1.36087e+07	1.48003e+07	High	High	High	High	High	High	1
High	Master Protein	A0A078GQL6	BnaUnng00110D protein OS=Brassica napus OX=3708 GN=BnaUnng00110D PE=3 SV=1	0	116.534	29	18	63	17	610	68.1	8.16	230	86.38	17	18			catalytic activity;nucleotide binding	Pf00350, Pf01031, Pf02212	106446337; 106446338	GSBRNA2T00038427001	LOC106446337; LOC106446338	A4		0	1	1.29034e+07	1.31841e+07	1.15237e+07	1.19989e+07	1.33329e+07	1.43076e+07	High	High	High	High	High	High	1
High	Master Protein	A0A078I219	UTP--glucose-1-phosphate uridylyltransferase OS=Brassica napus OX=3708 GN=BnaA05g32480D PE=3 SV=1	0	116.398	27	9	84	4	719	79.2	6.16	346	132.05	8	9	metabolic process		catalytic activity	Pf01704		GSBRNA2T00076110001				0	7	2.41444e+07	2.5358e+07	1.96152e+07	2.45691e+07	2.92457e+07	3.06354e+07	High	High	High	High	High	High	1
High	Master Protein	A0A078HZF7	BnaC05g48550D protein OS=Brassica napus OX=3708 GN=BnaC05g48550D PE=3 SV=1	0	116.277	31	13	70	1	529	58.8	6.71	292	84.6	13	12	metabolic process		catalytic activity;metal ion binding	Pf00675, Pf05193		GSBRNA2T00076296001				0	0	932301	989842	858306	789740	1.0035e+06	928253	High	High	High	High	High	High	1
High	Master Protein	D1L8N3	Photosystem II D2 protein OS=Brassica napus OX=3708 GN=psbD PE=3 SV=1	0	115.994	22	6	112	6	353	39.5	5.74	601	218.45	6	6	metabolic process;transport	membrane	catalytic activity;metal ion binding	Pf00124	11542039		psbD		Photosynthesis; Metabolic pathways	2	0	7.00221e+07	7.13531e+07	7.40607e+07	6.92954e+07	8.0548e+07	8.54351e+07	High	High	High	High	High	High	1
High	Master Protein	A0A078IIB3	BnaC03g61170D protein OS=Brassica napus OX=3708 GN=BnaC03g61170D PE=3 SV=1	0	115.851	21	12	70	3	681	72.9	6.15	314	89.41	12	10	cell organization and biogenesis;metabolic process		catalytic activity;nucleotide binding;protein binding	Pf00012, Pf02782, Pf06723		GSBRNA2T00093573001				0	5	1.55953e+07	1.68204e+07	1.32321e+07	1.37006e+07	1.62931e+07	1.75467e+07	High	High	High	High	High	High	1
High	Master Protein	A0A078GK13	BnaC03g69540D protein OS=Brassica napus OX=3708 GN=BnaC03g69540D PE=4 SV=1	0	115.757	22	19	75	1	891	101.6	6.07	261	92.49	19	17	metabolic process		catalytic activity	Pf00311		GSBRNA2T00033072001				0	10	2.14433e+07	2.27435e+07	1.95915e+07	2.03035e+07	2.27473e+07	2.48905e+07	High	High	High	High	High	High	1
High	Master Protein	A0A078JPS4	ATP citrate synthase (Fragment) OS=Brassica napus OX=3708 GN=BnaAnng28310D PE=4 SV=1	0	115.676	23	9	86	1	536	57.7	8.16	340	114.63	9	8	metabolic process	cytosol;membrane	catalytic activity	Pf00285, Pf00549, Pf13607		GSBRNA2T00077601001				0	0	279073	299862	254538	258753	302810	300056	High	High	High	High	High	High	1
High	Master Protein	Q9AT79	GF14 lambda (Fragment) OS=Brassica napus OX=3708 PE=3 SV=1	0	115.256	53	9	54	8	225	25.4	4.82	277	88.71	9	8			protein binding	Pf00244	106418681		LOC106418681	C2		0	1	1.6571e+07	1.83083e+07	1.58236e+07	1.71644e+07	2.00046e+07	2.11066e+07	High	High	High	High	High	High	1
High	Master Protein	A0A078J2R9	BnaA03g55890D protein OS=Brassica napus OX=3708 GN=BnaA03g55890D PE=3 SV=1	0	115.106	47	12	124	1	377	41.7	5.49	528	163.34	12	11				Pf00022	106384924	GSBRNA2T00134592001; GSBRNA2T00019724001	LOC106384924	C3		0	0	1.26413e+06	1.33535e+06	1.1492e+06	1.22008e+06	1.43633e+06	1.39907e+06	High	High	High	High	High	High	1
High	Master Protein	P93065	Myrosinase binding protein OS=Brassica napus OX=3708 PE=2 SV=1	0	115.011	21	14	42	5	988	104.3	5.62	219	54.78	14	10				Pf01419	106403316		LOC106403316			0	8	1.26228e+07	1.32433e+07	9.7752e+06	1.08604e+07	1.42274e+07	1.43767e+07	High	High	High	High	High	High	1
High	Master Protein	Q32VA2	Phenylalanine ammonia-lyase OS=Brassica napus OX=3708 GN=PAL2-1 PE=2 SV=1	0	114.744	21	14	93	7	724	78.5	6.46	429	102.68	14	9	metabolic process	cytoplasm	catalytic activity	Pf00221	106371449		LOC106371449		Biosynthesis of secondary metabolites; Phenylalanine metabolism; Phenylpropanoid biosynthesis; Metabolic pathways	4	0	1.88033e+07	1.91482e+07	1.55699e+07	1.5004e+07	1.74345e+07	1.87246e+07	High	High	High	High	High	High	1
High	Master Protein	A0A078GXH8	BnaA08g27100D protein OS=Brassica napus OX=3708 GN=BnaA08g27100D PE=4 SV=1	0	114.7	32	10	96	2	390	43.9	6.16	394	141.73	10	9	metabolic process		catalytic activity	Pf01073, Pf01370, Pf03435, Pf07993	106362276	GSBRNA2T00047249001	LOC106362276	A8	Metabolic pathways; Amino sugar and nucleotide sugar metabolism	2	9	3.61065e+07	3.86152e+07	2.91809e+07	3.17518e+07	3.82793e+07	4.09814e+07	High	High	High	High	High	High	1
High	Master Protein	A0A078HXH8	Phosphoglucomutase (alpha-D-glucose-1,6-bisphosphate-dependent) OS=Brassica napus OX=3708 GN=BnaA08g20600D PE=3 SV=1	0	114.153	30	15	91	5	583	63.3	5.94	340	102.63	15	13	metabolic process		catalytic activity;metal ion binding	Pf00408, Pf02878, Pf02879, Pf02880		GSBRNA2T00073060001				0	11	3.81106e+07	3.93958e+07	3.15389e+07	3.41608e+07	3.93032e+07	4.18215e+07	High	High	High	High	High	High	1
High	Master Protein	A0A078HD31	BnaA01g33220D protein OS=Brassica napus OX=3708 GN=BnaA01g33220D PE=3 SV=1	0	113.804	33	14	71	2	528	58.7	6.49	286	82.22	14	12	metabolic process		catalytic activity;metal ion binding	Pf00675, Pf05193		GSBRNA2T00057220001				0	13	3.62562e+07	4.0754e+07	3.34504e+07	3.08104e+07	3.71702e+07	3.87073e+07	High	High	High	High	High	High	1
High	Master Protein	W8R8Y9	Heat shock protein 70-1 OS=Brassica napus OX=3708 GN=HSP70-1 PE=3 SV=1	0	113.206	26	18	88	9	712	75.8	5.31	298	98.97	17	16	cell organization and biogenesis;metabolic process		nucleotide binding;protein binding	Pf00012, Pf03980, Pf06406, Pf06723, Pf14931	106440803		LOC106440803	A3		0	9	6.79573e+07	7.12882e+07	5.63724e+07	5.08169e+07	5.86874e+07	6.40481e+07	High	High	High	High	High	High	1
High	Master Protein	A0A078GH06	CCT-alpha OS=Brassica napus OX=3708 GN=BnaC05g32480D PE=3 SV=1	0	113.07	27	12	67	12	545	59	6.3	255	68.91	12	10	metabolic process	cytoplasm	nucleotide binding;protein binding	Pf07070		GSBRNA2T00026891001				0	0	2.16049e+07	2.12327e+07	1.71116e+07	2.13255e+07	2.5767e+07	2.63873e+07	High	High	High	High	High	High	1
High	Master Protein	A0A078HXQ6	BnaC01g00490D protein OS=Brassica napus OX=3708 GN=BnaC01g00490D PE=4 SV=1	0	112.575	18	16	58	4	1068	121	9	233	80.93	16	14	transport		protein binding;structural molecule activity	Pf00400, Pf04053, Pf06957		GSBRNA2T00075144001				0	13	1.42734e+07	1.47705e+07	1.29111e+07	1.35884e+07	1.5357e+07	1.67152e+07	High	High	High	High	High	High	1
High	Master Protein	A0A078HBA6	BnaA09g41460D protein OS=Brassica napus OX=3708 GN=BnaA09g41460D PE=3 SV=1	0	112.139	33	11	81	2	503	53.9	7.3	385	98.6	11	10	metabolic process		catalytic activity	Pf00171		GSBRNA2T00057324001				0	0	9.09527e+06	9.91329e+06	7.86823e+06	8.08955e+06	1.03918e+07	9.57171e+06	High	High	High	High	High	High	1
High	Master Protein	A0A078JY23	BnaCnng72220D protein OS=Brassica napus OX=3708 GN=BnaCnng72220D PE=3 SV=1	0	111.56	45	11	97	8	257	28.9	4.79	383	134.79	11	10			protein binding	Pf00244		GSBRNA2T00013874001				0	0	2.71585e+07	2.91528e+07	2.29041e+07	2.4425e+07	2.70316e+07	3.04018e+07	High	High	High	High	High	High	1
High	Master Protein	A0A078GBF1	BnaC08g43300D protein OS=Brassica napus OX=3708 GN=BnaC08g43300D PE=4 SV=1	0	111.489	32	10	85	2	389	43.8	6.01	349	118.17	10	9	metabolic process		catalytic activity	Pf01370, Pf03435, Pf07993	106420214	GSBRNA2T00122228001; GSBRNA2T00019369001	LOC106420214	A9	Metabolic pathways; Amino sugar and nucleotide sugar metabolism	2	0	1.27601e+06	1.35305e+06	1.00368e+06	1.149e+06	1.3527e+06	1.42314e+06	High	High	High	High	High	High	1
High	Master Protein	A0A078FVX7	CCT-beta OS=Brassica napus OX=3708 GN=BnaC09g37000D PE=3 SV=1	0	111.038	28	12	54	12	527	57.3	5.78	246	76.83	12	9	metabolic process	cytoplasm	nucleotide binding;protein binding	Pf00118	106371707	GSBRNA2T00094371001	LOC106371707	A10		0	0	2.86069e+07	2.90582e+07	2.32483e+07	2.48889e+07	3.19833e+07	3.33354e+07	High	High	High	High	High	High	1
High	Master Protein	A0A078FY22	Acyl-[acyl-carrier-protein] desaturase OS=Brassica napus OX=3708 GN=BnaC04g03030D PE=3 SV=1	0	111.021	31	9	109	2	399	45.4	6.33	487	134.64	9	7	metabolic process		catalytic activity;metal ion binding	Pf03405	106447152	GSBRNA2T00002263001	LOC106447152	C4	Fatty acid metabolism; Fatty acid biosynthesis; Biosynthesis of unsaturated fatty acids	3	0	6.28338e+06	6.6919e+06	5.82839e+06	5.80429e+06	6.68468e+06	7.57808e+06	High	High	High	High	High	High	1
High	Master Protein	A0A078I954	BnaC06g09980D protein OS=Brassica napus OX=3708 GN=BnaC06g09980D PE=4 SV=1	0	110.975	23	19	69	1	838	95.6	6.18	245	83	19	17	metabolic process		catalytic activity	Pf00311		GSBRNA2T00082920001				0	0							High	High	High	High	High	High	1
High	Master Protein	A0A078HBR4	BnaA09g48250D protein OS=Brassica napus OX=3708 GN=BnaA09g48250D PE=4 SV=1	0	110.614	26	14	111	2	735	81.6	8.62	506	147.81	14	11		membrane	catalytic activity;metal ion binding;nucleotide binding	Pf00289, Pf02222, Pf02785, Pf02786, Pf07478, Pf08443, Pf13535, Pf15632		GSBRNA2T00057468001				0	13	7.78143e+07	8.13687e+07	6.50323e+07	7.09681e+07	8.61094e+07	8.85541e+07	High	High	High	High	High	High	1
High	Master Protein	A0A076VFP7	Photosystem II CP47 reaction center protein OS=Brassica napus OX=3708 GN=psbB PE=3 SV=1	0	110.318	18	8	96	8	508	56.1	6.89	508	147.9	8	7	metabolic process	membrane		Pf00421						0	0	9.28122e+07	9.36286e+07	8.74855e+07	8.95818e+07	1.04242e+08	1.06787e+08	High	High	High	High	High	High	1
High	Master Protein	A0A078I2C5	BnaCnng12150D protein OS=Brassica napus OX=3708 GN=BnaCnng12150D PE=3 SV=1	0	109.713	22	10	60	2	538	58.4	7.72	268	82.79	10	9	metabolic process		catalytic activity	Pf00171		GSBRNA2T00081175001				0	0	1.14421e+06	1.05191e+06	868883	1.01388e+06	1.1342e+06	1.25792e+06	High	High	High	High	High	High	1
High	Master Protein	A0A078H9K8	Dihydrolipoyl dehydrogenase OS=Brassica napus OX=3708 GN=BnaC01g21970D PE=3 SV=1	0	109.574	19	9	100	1	548	58.3	7.62	409	108.06	9	9	cellular homeostasis;metabolic process;regulation of biological process		catalytic activity;nucleotide binding	Pf00070, Pf00890, Pf02852, Pf07992, Pf13434		GSBRNA2T00056523001				0	0	8.25736e+06	8.22015e+06	6.49329e+06	6.40699e+06	8.62622e+06	8.19893e+06	High	High	High	High	High	High	1
High	Master Protein	A0A078I290	Phosphogluconate dehydrogenase (NADP(+)-dependent, decarboxylating) OS=Brassica napus OX=3708 GN=BnaC05g48310D PE=3 SV=1	0	108.913	37	11	89	2	403	44.4	5.82	418	117.86	11	10	metabolic process		catalytic activity	Pf00393, Pf03446		GSBRNA2T00076266001				0	2	8.42219e+06	8.58619e+06	7.7193e+06	6.8587e+06	8.16252e+06	7.79132e+06	High	High	High	High	High	High	1
High	Master Protein	A0A078ISB0	Phosphoglycerate kinase OS=Brassica napus OX=3708 GN=BnaCnng23600D PE=3 SV=1	0	107.944	21	12	63	7	797	84.5	7.68	330	86.36	12	8	metabolic process		catalytic activity	Pf00106, Pf00162, Pf13561		GSBRNA2T00008028001				0	6	3.87588e+07	3.72966e+07	3.05344e+07	3.12504e+07	4.0147e+07	4.25485e+07	High	High	High	High	High	High	1
High	Master Protein	D9I764	Biotin carboxylase OS=Brassica napus OX=3708 GN=BnaC.BC.a PE=4 SV=1	0	107.773	35	14	105	2	535	58.4	6.95	475	143.59	14	10			catalytic activity;metal ion binding;nucleotide binding	Pf00289, Pf02785, Pf02786, Pf13535	106350529		LOC106350529	C5		0	0	951479	1.04679e+06	782741	877282	1.03337e+06	998935	High	High	High	High	High	High	1
High	Master Protein	A0A078JW87	BnaAnng39250D protein (Fragment) OS=Brassica napus OX=3708 GN=BnaAnng39250D PE=3 SV=1	0	107.657	28	7	55	1	217	23.5	10.27	273	99.09	6	7	metabolic process	nucleus;ribosome	structural molecule activity	Pf00411, Pf02984		GSBRNA2T00022482001				0	0	3.15733e+06	3.78752e+06	2.59347e+06	2.96529e+06	3.7944e+06	4.03891e+06	High	High	High	High	High	High	1
High	Master Protein	A0A078GJX5	Succinate--CoA ligase [ADP-forming] subunit beta, mitochondrial OS=Brassica napus OX=3708 GN=BnaC09g11540D PE=3 SV=1	0	107.24	42	15	75	2	421	45.3	7.33	282	102.92	15	13	metabolic process	mitochondrion	catalytic activity;metal ion binding;nucleotide binding	Pf00549, Pf08442	106390257	GSBRNA2T00032774001	LOC106390257	C1	Carbon metabolism; Citrate cycle (TCA cycle); Metabolic pathways; Biosynthesis of secondary metabolites; Propanoate metabolism	5	13	3.85693e+07	3.95874e+07	2.94621e+07	3.37421e+07	4.08625e+07	4.35081e+07	High	High	High	High	High	High	1
High	Master Protein	A0A078J5Z4	BnaC08g49360D protein OS=Brassica napus OX=3708 GN=BnaC08g49360D PE=4 SV=1	0	107.125	62	9	97	5	167	16.1	5.66	437	90.17	9	7			RNA binding	Pf00076, Pf13893, Pf14259		GSBRNA2T00027665001				0	5	6.38679e+07	6.24784e+07	5.24298e+07	5.02042e+07	5.95385e+07	6.2118e+07	High	High	High	High	High	High	1
High	Master Protein	A0A078HYT7	BnaAnng07600D protein OS=Brassica napus OX=3708 GN=BnaAnng07600D PE=3 SV=1	0	107.053	25	7	62	1	245	27.2	10.33	299	110.62	6	7	metabolic process	ribosome	structural molecule activity	Pf00411		GSBRNA2T00077239001				0	8	3.16611e+07	3.62815e+07	2.6657e+07	2.96993e+07	3.50311e+07	3.93743e+07	High	High	High	High	High	High	1
High	Master Protein	A0A078K329	BnaAnng40540D protein (Fragment) OS=Brassica napus OX=3708 GN=BnaAnng40540D PE=3 SV=1	0	106.752	33	14	85	4	456	51.8	4.83	329	123.88	14	12	metabolic process	endoplasmic reticulum;membrane	metal ion binding;protein binding	Pf00262		GSBRNA2T00027418001				0	0	1.00137e+07	1.1398e+07	9.75236e+06	1.40124e+07	1.54508e+07	1.68656e+07	High	High	High	High	High	High	1
High	Master Protein	A0A078IN20	Adenosylhomocysteinase OS=Brassica napus OX=3708 GN=BnaCnng19320D PE=3 SV=1	0	106.674	26	10	147	5	485	53.2	5.86	418	188	10	10	metabolic process;transport		catalytic activity;nucleotide binding	Pf00670, Pf02254, Pf02826, Pf05221, Pf07991		GSBRNA2T00096663001				0	9	1.33413e+08	1.32712e+08	1.08667e+08	1.07827e+08	1.16079e+08	1.40418e+08	High	High	High	High	High	High	1
High	Master Protein	A0A078FS77	BnaA10g10190D protein OS=Brassica napus OX=3708 GN=BnaA10g10190D PE=4 SV=1	0	106.566	14	11	40	2	972	106.8	6.44	186	64.26	11	10	metabolic process	cytoplasm	catalytic activity;nucleotide binding	Pf00288, Pf13528		GSBRNA2T00095497001				0	6	9.89673e+06	9.81462e+06	8.33368e+06	9.8193e+06	1.11521e+07	1.22386e+07	High	High	High	High	High	High	1
High	Master Protein	A0A078HR94	BnaA10g27060D protein OS=Brassica napus OX=3708 GN=BnaA10g27060D PE=4 SV=1	0	106.557	30	12	104	1	454	50.7	5.81	429	120.96	12	11			nucleotide binding	Pf00012		GSBRNA2T00069553001				0	0	3.06235e+06	3.16732e+06	3.18607e+06	2.58676e+06	2.92712e+06	2.8238e+06	High	High	High	High	High	High	1
High	Master Protein	Q6YSN4	ATP synthase subunit alpha OS=Brassica napus OX=3708 GN=atp1 PE=3 SV=1	0	106.388	32	11	78	10	507	55.1	6.33	315	89.02	10	8	metabolic process;transport	mitochondrion	catalytic activity;nucleotide binding;transporter activity	Pf00006, Pf00306, Pf02874, Pf09378	4237873		atp1	MT	Oxidative phosphorylation; Metabolic pathways	2	1	5.3153e+07	5.72256e+07	4.69884e+07	4.82003e+07	5.73245e+07	5.93248e+07	High	High	High	High	High	High	1
High	Master Protein	Q42629	Sinigrinase OS=Brassica napus OX=3708 GN=Myr2.Bn1 PE=3 SV=1	0	106.379	26	13	95	1	544	62.2	6.74	374	77.05	13	9	metabolic process		catalytic activity	Pf00232	106382545		LOC106382545	C2		0	0	166424	152701	151905	168717	190755	185208	High	High	High	High	High	High	1
High	Master Protein	A0A078HXF5	Diadenosine tetraphosphate synthetase OS=Brassica napus OX=3708 GN=BnaA07g07590D PE=3 SV=1	0	106.223	21	13	58	13	722	80.9	6.89	248	71.75	13	9	metabolic process	cytoplasm	catalytic activity;nucleotide binding	Pf00458, Pf00587, Pf03129		GSBRNA2T00076197001				0	0	2.29873e+07	2.26821e+07	1.9015e+07	2.25613e+07	2.54786e+07	2.79993e+07	High	High	High	High	High	High	1
High	Master Protein	A0A078G7N0	Phosphoglucomutase (alpha-D-glucose-1,6-bisphosphate-dependent) OS=Brassica napus OX=3708 GN=BnaA09g30060D PE=3 SV=1	0	106.069	25	12	78	2	674	73	6.3	296	91.8	12	11	metabolic process		catalytic activity;metal ion binding	Pf00408, Pf02878, Pf02879, Pf02880		GSBRNA2T00015811001				0	0	1.69946e+06	1749075	1.43314e+06	1.54979e+06	1.87971e+06	1911059	High	High	High	High	High	High	1
High	Master Protein	A0A078GX24	Pyrophosphate--fructose 6-phosphate 1-phosphotransferase subunit beta OS=Brassica napus OX=3708 GN=BnaC05g09740D PE=3 SV=1	0	105.776	27	13	72	13	566	61.4	6.1	283	85.59	13	12	metabolic process	cytoplasm	catalytic activity;metal ion binding;nucleotide binding	Pf00365	106450749	GSBRNA2T00044584001	LOC106450749	C5	Pentose phosphate pathway; Glycolysis / Gluconeogenesis; Metabolic pathways; Biosynthesis of secondary metabolites; Fructose and mannose metabolism	5	0	3.51029e+07	3.67763e+07	2.8764e+07	3.46949e+07	4.26238e+07	4.26789e+07	High	High	High	High	High	High	1
High	Master Protein	E3US75	Sinigrinase OS=Brassica napus OX=3708 PE=2 SV=1	0	105.106	26	13	94	2	548	62.7	7.06	372	77.05	13	9	metabolic process		catalytic activity	Pf00232	106382659		LOC106382659	A2		0	2	1.10995e+07	1.14599e+07	1.05304e+07	1.12089e+07	1.06103e+07	1.13923e+07	High	High	High	High	High	High	1
High	Master Protein	A0A078GZE1	CCT-theta OS=Brassica napus OX=3708 GN=BnaC01g40350D PE=3 SV=1	0	105.072	35	18	67	2	544	58.4	5.35	275	75.94	18	16	metabolic process	cytoplasm	nucleotide binding;protein binding	Pf00118	106433056	GSBRNA2T00044491001	LOC106433056	A4		0	0	455884	494593	410401	361061	473723	467266	High	High	High	High	High	High	1
High	Master Protein	A0A078GBR0	Alanine--tRNA ligase OS=Brassica napus OX=3708 GN=BnaA06g02930D PE=3 SV=1	0	104.959	16	14	40	3	999	109.8	6.23	170	54.55	14	13	metabolic process	cytoplasm;mitochondrion	catalytic activity;metal ion binding;nucleotide binding;RNA binding	Pf01411, Pf02272, Pf07973		GSBRNA2T00021122001				0	11	2.51584e+07	2.53022e+07	2.07381e+07	2.17745e+07	2.56449e+07	2.70064e+07	High	High	High	High	High	High	1
High	Master Protein	A0A078G8X2	CCT-theta OS=Brassica napus OX=3708 GN=BnaA01g33840D PE=3 SV=1	0	104.262	35	18	63	2	544	58.4	5.35	262	69.72	18	16	metabolic process	cytoplasm	nucleotide binding;protein binding	Pf00118	106445308	GSBRNA2T00015342001	LOC106445308	A7		0	16	4.75598e+07	4.79326e+07	4.0423e+07	4.00229e+07	4.84162e+07	5.26214e+07	High	High	High	High	High	High	1
High	Master Protein	A0A078GAI4	Fructose-bisphosphate aldolase OS=Brassica napus OX=3708 GN=BnaA06g37230D PE=3 SV=1	0	104.153	30	10	98	1	393	42.6	7.8	447	97.4	10	10	metabolic process		catalytic activity	Pf00274		GSBRNA2T00018891001				0	0	7.93549e+06	8.55794e+06	7.0449e+06	7.09427e+06	7.72764e+06	8.24005e+06	High	High	High	High	High	High	1
High	Master Protein	A0A078FGM1	Fructose-bisphosphate aldolase OS=Brassica napus OX=3708 GN=BnaC03g60280D PE=3 SV=1	0	104.123	31	10	92	1	383	41.3	5.85	411	92.96	10	10	metabolic process		catalytic activity	Pf00274		GSBRNA2T00061091001				0	0	4.8864e+06	4.93609e+06	3.81577e+06	3.95771e+06	4.61067e+06	4.64218e+06	High	High	High	High	High	High	1
High	Master Protein	A0A078FMU9	11S globulin OS=Brassica napus OX=3708 GN=BnaA08g13680D PE=3 SV=1	0	104.1	30	11	161	6	493	54.8	7.8	921	114.39	11	8				Pf00190, Pf07883		GSBRNA2T00078812001				0	0	6.10707e+06	7.68312e+06	6.75893e+06	9.51086e+06	9.97638e+06	9.41895e+06	High	High	High	High	High	High	1
High	Master Protein	A0A078G8F4	BnaC03g29860D protein OS=Brassica napus OX=3708 GN=BnaC03g29860D PE=3 SV=1	0	104.089	16	6	45	4	601	65.8	6.23	261	72.8	6	6	metabolic process		catalytic activity	Pf00026, Pf03489, Pf05184, Pf13650, Pf14543		GSBRNA2T00015634001				0	2	1.81048e+07	2.03526e+07	1.60713e+07	1.49009e+07	1.67713e+07	1.74371e+07	High	High	High	High	High	High	1
High	Master Protein	A0A078IW42	Coatomer subunit alpha OS=Brassica napus OX=3708 GN=BnaA06g40470D PE=4 SV=1	0	103.968	14	15	66	1	1208	135.6	7.34	239	83.06	15	14	transport	cytoplasm;Golgi;membrane	protein binding;structural molecule activity	Pf00400, Pf04053, Pf06957		GSBRNA2T00008717001				0	3	1.52698e+07	1.52133e+07	1.31166e+07	1.44739e+07	1.70092e+07	1.75469e+07	High	High	High	High	High	High	1
High	Master Protein	A0A078HR75	BnaA10g27260D protein OS=Brassica napus OX=3708 GN=BnaA10g27260D PE=4 SV=1	0	103.933	44	8	49	1	253	27.2	6.14	248	86.28	8	7	metabolic process		catalytic activity	Pf01073, Pf01370, Pf05368, Pf13460		GSBRNA2T00069528001				0	0	881632	918025	789790	916307	991180	1.06851e+06	High	High	High	High	High	High	1
High	Master Protein	A0A078GC78	BnaA06g00680D protein OS=Brassica napus OX=3708 GN=BnaA06g00680D PE=3 SV=1	0	103.604	18	9	49	2	732	82.9	8.41	259	91.91	9	8	metabolic process	cytoplasm;nucleus;proteasome	catalytic activity	Pf00227, Pf03763, Pf10584		GSBRNA2T00024610001				0	9	3.43304e+07	3.77792e+07	2.77278e+07	2.88457e+07	3.48008e+07	3.78146e+07	High	High	High	High	High	High	1
High	Master Protein	A0A078HA55	Succinate--CoA ligase [ADP-forming] subunit beta, mitochondrial OS=Brassica napus OX=3708 GN=BnaA09g11210D PE=3 SV=1	0	103.558	40	14	71	1	421	45.3	7.02	273	100.23	14	13	metabolic process	mitochondrion	catalytic activity;metal ion binding;nucleotide binding	Pf00549, Pf08442		GSBRNA2T00056438001				0	0	818247	845024	664085	743801	849750	953994	High	High	High	High	High	High	1
High	Master Protein	P33524	Cruciferin BnC2 OS=Brassica napus OX=3708 GN=BnC2 PE=3 SV=2	0	103.291	21	8	149	5	496	54.3	8.51	708	142.59	8	7				Pf00190	106407109		LOC106407109	A2		0	0	1.31389e+07	1.59711e+07	1.47157e+07	1.07999e+07	1.03883e+07	9.84466e+06	High	High	High	High	High	High	1
High	Master Protein	A0A078HVW3	Fructose-bisphosphate aldolase OS=Brassica napus OX=3708 GN=BnaC01g00070D PE=3 SV=1	0	102.679	29	10	89	1	399	42.9	6.4	412	92.85	10	10	metabolic process		catalytic activity	Pf00274		GSBRNA2T00075099001				0	9	4.93832e+07	5.10469e+07	4.30392e+07	4.02232e+07	4.65682e+07	5.13699e+07	High	High	High	High	High	High	1
High	Master Protein	A0A078H345	Dihydrolipoyl dehydrogenase OS=Brassica napus OX=3708 GN=BnaA01g17630D PE=3 SV=1	0	102.607	19	10	96	2	549	58.7	7.8	369	106.12	10	10	cellular homeostasis;metabolic process;regulation of biological process		catalytic activity;nucleotide binding	Pf00070, Pf00890, Pf02852, Pf07992, Pf13434		GSBRNA2T00051655001				0	10	1.08736e+08	1.05984e+08	9.68171e+07	9.90852e+07	1.16025e+08	1.21819e+08	High	High	High	High	High	High	1
High	Master Protein	A0A078GP33	BnaC09g42450D protein OS=Brassica napus OX=3708 GN=BnaC09g42450D PE=3 SV=1	0	102.385	20	19	52	15	973	109.1	5.99	210	71.67	19	17	metabolic process;response to stimulus	cytoplasm	catalytic activity;nucleotide binding	Pf00004, Pf02403, Pf02861, Pf04111, Pf07724, Pf07728, Pf10431, Pf13191, Pf13401	106424692; 106424702	GSBRNA2T00035213001	LOC106424692; LOC106424702	C9		0	4	2.47412e+07	2.46192e+07	1.97914e+07	1.87489e+07	2.19757e+07	2.29116e+07	High	High	High	High	High	High	1
High	Master Protein	A0A078FA32	BnaC05g04790D protein OS=Brassica napus OX=3708 GN=BnaC05g04790D PE=4 SV=1	0	102.24	19	16	56	1	1005	111	5.86	198	74.6	16	14						GSBRNA2T00032058001				0	0	1.88133e+06	1.89009e+06	1.71762e+06	1.77908e+06	2.07364e+06	2.03488e+06	High	High	High	High	High	High	1
High	Master Protein	A0A078GGV4	BnaC03g69900D protein OS=Brassica napus OX=3708 GN=BnaC03g69900D PE=3 SV=1	0	102.085	38	13	67	13	426	47.8	6.65	260	60.24	13	12	metabolic process;regulation of biological process	cytoplasm	catalytic activity;nucleotide binding;protein binding	Pf00004, Pf00158, Pf07724, Pf07726, Pf07728, Pf13191, Pf13401	106377314	GSBRNA2T00033026001	LOC106377314	C3	Proteasome	1	0	1.7534e+07	1.82367e+07	1.49543e+07	1.514e+07	1.85686e+07	1.98489e+07	High	High	High	High	High	High	1
High	Master Protein	A0A078FW60	BnaA09g20460D protein OS=Brassica napus OX=3708 GN=BnaA09g20460D PE=3 SV=1	0	101.671	21	6	45	4	507	55.2	6.84	239	77.64	6	5	metabolic process		catalytic activity	Pf00026, Pf03489, Pf05184, Pf13650, Pf14543		GSBRNA2T00094512001				0	0	7.48811e+06	8.23411e+06	7.05439e+06	7.58737e+06	8.86884e+06	9.69045e+06	High	High	High	High	High	High	1
High	Master Protein	A0A078GYK0	Protein disulfide-isomerase OS=Brassica napus OX=3708 GN=BnaA10g13460D PE=3 SV=1	0	101.341	22	13	64	13	596	66	4.68	267	91.07	13	12	cellular homeostasis;metabolic process;regulation of biological process	endoplasmic reticulum	catalytic activity	Pf00085, Pf08066, Pf13098, Pf13848, Pf13899, Pf13905		GSBRNA2T00047838001				0	0	5.00266e+07	5.45223e+07	4.22427e+07	4.36931e+07	5.06248e+07	5.19643e+07	High	High	High	High	High	High	1
High	Master Protein	A0A078FEB8	BnaCnng03590D protein OS=Brassica napus OX=3708 GN=BnaCnng03590D PE=4 SV=1	0	101.013	44	8	51	1	253	27.2	6.62	253	88.92	8	7	metabolic process		catalytic activity	Pf01073, Pf01370, Pf05368, Pf13460		GSBRNA2T00032385001				0	7	1.1896e+07	1.3291e+07	1.03028e+07	1.05646e+07	1.28006e+07	1.30991e+07	High	High	High	High	High	High	1
High	Master Protein	A0A078J9L6	BnaA05g34780D protein OS=Brassica napus OX=3708 GN=BnaA05g34780D PE=3 SV=1	0	100.676	21	13	54	8	620	68.9	5.74	201	64.31	13	13		membrane	metal ion binding			GSBRNA2T00030015001				0	5	2.08699e+07	2.07816e+07	1.90009e+07	2.07965e+07	2.15223e+07	2.50443e+07	High	High	High	High	High	High	1
High	Master Protein	A0A078FGD5	Dihydrolipoamide acetyltransferase component of pyruvate dehydrogenase complex OS=Brassica napus OX=3708 GN=BnaAnng02240D PE=3 SV=1	0	100.415	19	5	53	5	450	47.2	8.16	287	83.53	5	5	metabolic process		catalytic activity	Pf00198, Pf00364	106367039	GSBRNA2T00060980001	LOC106367039	A9	Metabolic pathways; Carbon metabolism; Glycolysis / Gluconeogenesis; Pyruvate metabolism; Biosynthesis of secondary metabolites; Citrate cycle (TCA cycle)	6	0	7.13661e+06	7.67812e+06	6.80018e+06	6.9486e+06	8.10487e+06	8.28795e+06	High	High	High	High	High	High	1
High	Master Protein	A0A078FRU9	BnaA04g12350D protein OS=Brassica napus OX=3708 GN=BnaA04g12350D PE=4 SV=1	0	100.367	54	8	95	3	169	16.3	5.66	470	71.36	8	6			RNA binding	Pf00076, Pf13893, Pf14259		GSBRNA2T00090234001				0	2	1.28097e+07	1.31584e+07	1.09428e+07	1.22011e+07	1.38965e+07	1.43311e+07	High	High	High	High	High	High	1
High	Master Protein	A0A078GVZ3	Tubulin alpha chain OS=Brassica napus OX=3708 GN=BnaA05g16010D PE=3 SV=1	0	100.343	39	12	105	6	431	47.5	5.1	477	156.61	12	9	cell organization and biogenesis	cytoplasm;cytoskeleton	catalytic activity;nucleotide binding;structural molecule activity	Pf00091, Pf03953		GSBRNA2T00042896001				0	6	4.87233e+07	5.15411e+07	4.15757e+07	4.24328e+07	5.10019e+07	5.67167e+07	High	High	High	High	High	High	1
High	Master Protein	A0A078FBG7	E1 ubiquitin-activating enzyme OS=Brassica napus OX=3708 GN=BnaA05g12250D PE=3 SV=1	0	100.187	12	10	45	2	1065	118.3	5.31	218	75.03	10	10	metabolic process		catalytic activity;nucleotide binding	Pf00899, Pf02134, Pf09358, Pf10585		GSBRNA2T00048505001				0	8	1.50912e+07	1.58831e+07	1.24249e+07	1.36633e+07	1.6019e+07	1.70558e+07	High	High	High	High	High	High	1
High	Master Protein	A0A078F6T3	Oxoglutarate dehydrogenase (succinyl-transferring) OS=Brassica napus OX=3708 GN=BnaA06g24700D PE=3 SV=1	0	99.771	19	16	52	12	904	102.8	6.95	202	66.81	16	15	metabolic process		catalytic activity	Pf00676, Pf02779		GSBRNA2T00000684001				0	4	2.31603e+07	2.35445e+07	2.03088e+07	1.94218e+07	2.20847e+07	2.36667e+07	High	High	High	High	High	High	1
High	Master Protein	A0A078GS76	Clathrin heavy chain OS=Brassica napus OX=3708 GN=BnaC05g43990D PE=3 SV=1	0	99.582	7	10	57	1	1600	181	5.3	213	77.4	10	9	cell organization and biogenesis;transport	membrane	protein binding;structural molecule activity	Pf00637, Pf01394, Pf09268, Pf13838		GSBRNA2T00038921001				0	1	3.70638e+06	3.62351e+06	3.13679e+06	3.5219e+06	3.83887e+06	4257055	High	High	High	High	High	High	1
High	Master Protein	A0A078H348	UDP-glucose 4-epimerase OS=Brassica napus OX=3708 GN=BnaC08g15730D PE=3 SV=1	0	99.328	35	11	69	7	351	39.2	7.14	227	104.11	10	11	metabolic process		catalytic activity	Pf00106, Pf01073, Pf01370, Pf02719, Pf04321, Pf05368, Pf07993, Pf13460, Pf13950	106362044	GSBRNA2T00047440001	LOC106362044	C8	Metabolic pathways; Galactose metabolism; Amino sugar and nucleotide sugar metabolism	3	5	4.9604e+07	5.02389e+07	4.01672e+07	4.01663e+07	4.79342e+07	4.9862e+07	High	High	High	High	High	High	1
High	Master Protein	A0A078GM46	Proteasome subunit alpha type OS=Brassica napus OX=3708 GN=BnaC03g69920D PE=3 SV=1	0	99.294	40	8	49	1	283	31.3	5.55	255	93.43	8	7	metabolic process	cytoplasm;nucleus;proteasome	catalytic activity	Pf00227, Pf10584		GSBRNA2T00033024001				0	0	9.07211e+06	9.63548e+06	7.79951e+06	8.02846e+06	9.23046e+06	1.00258e+07	High	High	High	High	High	High	1
High	Master Protein	A0A078GB51	Elongation factor Tu OS=Brassica napus OX=3708 GN=BnaC09g00290D PE=3 SV=1	0	98.84	25	9	47	1	456	49.5	6.87	237	70.8	9	8	metabolic process		catalytic activity;nucleotide binding;RNA binding	Pf00009, Pf03143, Pf03144	106392270	GSBRNA2T00018251001	LOC106392270	C9		0	9	2.64709e+07	2.85033e+07	2.17618e+07	2.47748e+07	2.81786e+07	3.05283e+07	High	High	High	High	High	High	1
High	Master Protein	A0A078HPC0	Fructose-bisphosphate aldolase OS=Brassica napus OX=3708 GN=BnaA02g27140D PE=3 SV=1	0	98.735	36	12	76	11	389	42.3	8.32	373	68.29	12	9	metabolic process		catalytic activity	Pf00274	106454460	GSBRNA2T00069603001	LOC106454460	A8	Biosynthesis of secondary metabolites; Pentose phosphate pathway; Metabolic pathways; Glycolysis / Gluconeogenesis; Biosynthesis of amino acids; Carbon metabolism; Carbon fixation in photosynthetic organisms; Fructose and mannose metabolism	8	1	8.40546e+07	8.66562e+07	6.79761e+07	7.33451e+07	8.25874e+07	9.06469e+07	High	High	High	High	High	High	1
High	Master Protein	A0A078GNY0	BnaC06g12220D protein OS=Brassica napus OX=3708 GN=BnaC06g12220D PE=3 SV=1	0	98.639	13	14	39	14	1266	137.5	5.92	158	63.41	14	14			catalytic activity	Pf01968, Pf02538, Pf05378	106391366	GSBRNA2T00036796001	LOC106391366	C6	Glutathione metabolism	1	0	1.23527e+07	1.30318e+07	1.07945e+07	1.15062e+07	1.56486e+07	1.44466e+07	High	High	High	High	High	High	1
High	Master Protein	A0A078JUF1	Tubulin beta chain OS=Brassica napus OX=3708 GN=BnaCnng62490D PE=3 SV=1	0	98.616	29	10	68	4	445	49.9	4.83	227	92.23	9	7	cell organization and biogenesis	cytoplasm;cytoskeleton	catalytic activity;nucleotide binding;structural molecule activity	Pf00091, Pf03953, Pf10644		GSBRNA2T00084227001				0	8	5.12662e+07	5.41877e+07	4.51171e+07	4.66312e+07	5.31569e+07	5.84222e+07	High	High	High	High	High	High	1
High	Master Protein	A0A078FUI0	Transaldolase OS=Brassica napus OX=3708 GN=BnaA08g02750D PE=3 SV=1	0	98.456	20	9	78	9	440	48	7.15	372	101.61	9	9	metabolic process	cytoplasm	catalytic activity	Pf00923		GSBRNA2T00091086001				0	0	4.96471e+07	4.91763e+07	4.11316e+07	5.10843e+07	5.63325e+07	6.13601e+07	High	High	High	High	High	High	1
High	Master Protein	A0A078IPA5	BnaA03g06940D protein OS=Brassica napus OX=3708 GN=BnaA03g06940D PE=3 SV=1	0	98.366	34	5	147	2	186	21	7.62	720	244.44	5	4					106433705	GSBRNA2T00003005001	LOC106433705	A3		0	1	3.82355e+07	4.13097e+07	3.86187e+07	3.87145e+07	4.62304e+07	4.93209e+07	High	High	High	High	High	High	1
High	Master Protein	A0A078HB53	Phosphogluconate dehydrogenase (NADP(+)-dependent, decarboxylating) OS=Brassica napus OX=3708 GN=BnaA01g33010D PE=3 SV=1	0	98.203	37	11	80	3	404	44.5	5.82	371	115.39	11	9	metabolic process		catalytic activity	Pf00393, Pf03446		GSBRNA2T00057249001				0	8	3.75853e+07	3.70427e+07	3.1649e+07	3.32078e+07	3.89312e+07	4.15468e+07	High	High	High	High	High	High	1
High	Master Protein	A0A078G020	Elongation factor Tu OS=Brassica napus OX=3708 GN=BnaC03g30500D PE=3 SV=1	0	98.197	25	9	43	2	453	49.1	6.55	215	62.51	9	8	metabolic process		catalytic activity;nucleotide binding;RNA binding	Pf00009, Pf03143, Pf03144	106438716	GSBRNA2T00002353001	LOC106438716	A3		0	0	2.15063e+06	2.11742e+06	1.64165e+06	1.95627e+06	2.39011e+06	2.44481e+06	High	High	High	High	High	High	1
High	Master Protein	A0A078G6J1	Elongation factor Tu OS=Brassica napus OX=3708 GN=BnaA09g01140D PE=3 SV=1	0	97.937	25	9	47	1	455	49.4	6.55	235	70.32	9	8	metabolic process		catalytic activity;nucleotide binding;RNA binding	Pf00009, Pf03143, Pf03144	106389989	GSBRNA2T00018471001	LOC106389989; LOC106426683	A9		0	0	1173298	1.05877e+06	862094	915946	1089785	1.12914e+06	High	High	High	High	High	High	1
High	Master Protein	A0A078HNK1	BnaC02g00250D protein OS=Brassica napus OX=3708 GN=BnaC02g00250D PE=3 SV=1	0	97.813	17	11	54	7	697	78.4	5.88	223	75.42	11	11	metabolic process		catalytic activity;metal ion binding	Pf01432		GSBRNA2T00069025001				0	4	1.76523e+07	1.83833e+07	1.50164e+07	1.48748e+07	1.71398e+07	1.84759e+07	High	High	High	High	High	High	1
High	Master Protein	A0A078FEB2	Methionyl-tRNA synthetase OS=Brassica napus OX=3708 GN=BnaC04g29310D PE=3 SV=1	0	97.46	18	11	48	11	792	89.2	6.57	210	71.53	11	11	metabolic process	cytoplasm	catalytic activity;nucleotide binding;RNA binding	Pf00133, Pf01588, Pf09334		GSBRNA2T00070245001				0	0	1.91389e+07	1.89979e+07	1.67715e+07	1.84735e+07	1.94866e+07	2.23234e+07	High	High	High	High	High	High	1
High	Master Protein	A0A078FF50	[Acyl-carrier-protein] S-malonyltransferase OS=Brassica napus OX=3708 GN=BnaA05g12180D PE=4 SV=1	0	97.072	24	9	59	4	388	41	8.47	258	82.6	9	8	metabolic process		catalytic activity	Pf00698	106451436	GSBRNA2T00048518001	LOC106451436	A5	Fatty acid biosynthesis; Metabolic pathways; Fatty acid metabolism	3	6	6.07026e+07	6.61925e+07	5.4592e+07	5.40589e+07	6.50512e+07	6.72268e+07	High	High	High	High	High	High	1
High	Master Protein	A0A078FMB4	Ubiquitinyl hydrolase 1 OS=Brassica napus OX=3708 GN=BnaC02g01940D PE=3 SV=1	0	96.363	14	17	55	2	1116	130.8	5.73	189	71.21	17	16	metabolic process		catalytic activity;protein binding	Pf00443, Pf00917, Pf12436, Pf13423, Pf14533	106380823; 106401022; 106422766	GSBRNA2T00078613001	LOC106380823; LOC106401022; LOC106422766	C2; C5; A2		0	15	2.46104e+07	2.71932e+07	2.19615e+07	2.29093e+07	2.55003e+07	2.79661e+07	High	High	High	High	High	High	1
High	Master Protein	A0A078JM93	BnaCnng59840D protein (Fragment) OS=Brassica napus OX=3708 GN=BnaCnng59840D PE=4 SV=1	0	96.221	19	15	54	5	899	98.1	7.84	226	61.87	15	13	regulation of biological process			Pf00565, Pf00567		GSBRNA2T00076494001				0	3	5.87363e+06	5.9882e+06	4.9697e+06	4.65452e+06	5.39112e+06	5.58742e+06	High	High	High	High	High	High	1
High	Master Protein	A0A078HWK8	Transketolase OS=Brassica napus OX=3708 GN=BnaA09g38720D PE=3 SV=1	0	96.186	19	10	125	3	738	79.5	6.32	586	204.05	10	7	metabolic process		catalytic activity	Pf00456, Pf02775, Pf02779, Pf02780		GSBRNA2T00072539001				0	8	7.06875e+07	7.38635e+07	6.52039e+07	6.51866e+07	7.86022e+07	7.98985e+07	High	High	High	High	High	High	1
High	Master Protein	C3S7G4	Oleosin OS=Brassica napus OX=3708 GN=S3 PE=2 SV=1	0	95.732	41	11	183	4	195	21.5	9.31	398	154.65	11	11		membrane		Pf01277, Pf11877	106346567		LOC106346567	C1		0	10	7.24351e+07	8.2377e+07	9.12667e+07	1.02475e+08	1.05806e+08	1.02766e+08	High	High	High	High	High	High	1
High	Master Protein	A0A078IA90	Phospholipase D OS=Brassica napus OX=3708 GN=BnaAnng08250D PE=3 SV=1	0	95.433	15	11	42	4	885	100.2	6.92	172	59.48	11	11	metabolic process	membrane	catalytic activity;metal ion binding;protein binding	Pf00168, Pf00614, Pf12357, Pf13091		GSBRNA2T00086643001				0	7	2.23277e+07	2.21212e+07	2.16845e+07	2.22894e+07	2.26588e+07	2.59362e+07	High	High	High	High	High	High	1
High	Master Protein	A0A078H3X7	BnaA01g17720D protein OS=Brassica napus OX=3708 GN=BnaA01g17720D PE=4 SV=1	0	95.123	14	13	46	10	989	108.6	6.46	194	62.41	13	13	metabolic process	cytoplasm	catalytic activity;nucleotide binding	Pf10509, Pf13528, Pf13579	106446722	GSBRNA2T00051642001	LOC106446722	A1	Metabolic pathways; Amino sugar and nucleotide sugar metabolism	2	3	6.84171e+06	7.24148e+06	6.41624e+06	6.02429e+06	6.81977e+06	7.53035e+06	High	High	High	High	High	High	1
High	Master Protein	A0A078JMA7	UTP--glucose-1-phosphate uridylyltransferase OS=Brassica napus OX=3708 GN=BnaAnng25620D PE=3 SV=1	0	94.957	33	7	82	2	297	33.1	5.41	358	117.13	7	7	metabolic process		catalytic activity	Pf01704		GSBRNA2T00068308001				0	0	2.08669e+07	2.15257e+07	1.55692e+07	1.44854e+07	1.71397e+07	1.62579e+07	High	High	High	High	High	High	1
High	Master Protein	A0A078FAN5	11S globulin OS=Brassica napus OX=3708 GN=BnaC08g43570D PE=3 SV=1	0	94.898	26	10	119	2	446	49.1	6.33	493	112.23	9	9				Pf00190	106406164	GSBRNA2T00031894001	LOC106406164	C8		0	9	2.73216e+08	3.12207e+08	2.76914e+08	3.15868e+08	3.06127e+08	3.20607e+08	High	High	High	High	High	High	1
High	Master Protein	A0A078FTS7	BnaC04g15710D protein OS=Brassica napus OX=3708 GN=BnaC04g15710D PE=4 SV=1	0	94.861	21	9	77	9	472	52.4	6.13	362	83.29	9	8				Pf00190, Pf07883		GSBRNA2T00089995001				0	0	5.08279e+07	5.52989e+07	5.0655e+07	5.19274e+07	5.85849e+07	5.76295e+07	High	High	High	High	High	High	1
High	Master Protein	A0A078J813	BnaC03g74750D protein OS=Brassica napus OX=3708 GN=BnaC03g74750D PE=3 SV=1	0	94.706	22	8	65	8	548	60.8	7.21	317	106.88	8	8	metabolic process		catalytic activity	Pf00171, Pf03220		GSBRNA2T00033737001				0	0	2.59025e+07	2.6522e+07	2.34427e+07	2.35263e+07	2.62093e+07	2.75736e+07	High	High	High	High	High	High	1
High	Master Protein	A0A078I0P1	Phosphoglycerate kinase OS=Brassica napus OX=3708 GN=BnaA01g30320D PE=3 SV=1	0	94.669	24	8	50	2	480	50.2	7.47	278	71.23	8	7	metabolic process		catalytic activity;nucleotide binding	Pf00162, Pf08282	106377486	GSBRNA2T00076479001	LOC106377486	A1	Biosynthesis of secondary metabolites; Biosynthesis of amino acids; Metabolic pathways; Carbon metabolism; Carbon fixation in photosynthetic organisms; Glycolysis / Gluconeogenesis	6	1	1.05589e+06	1.16621e+06	990384	999611	1.09446e+06	1.20589e+06	High	High	High	High	High	High	1
High	Master Protein	A0A078HF00	Clathrin heavy chain OS=Brassica napus OX=3708 GN=BnaA05g29660D PE=3 SV=1	0	94.604	7	10	55	1	1606	181.5	5.29	212	76.44	9	10	cell organization and biogenesis;transport	membrane	protein binding;structural molecule activity	Pf00637, Pf01394, Pf09268, Pf13838		GSBRNA2T00059544001				0	0							High	High	High	High	High	High	1
High	Master Protein	A0A078HYS1	Annexin OS=Brassica napus OX=3708 GN=BnaA08g06260D PE=3 SV=1	0	94.537	38	12	62	4	317	36.1	5.44	249	68.59	12	11			metal ion binding	Pf00191		GSBRNA2T00073824001				0	0	4.33182e+06	4.75063e+06	3.6851e+06	3.29709e+06	4.23609e+06	4.50439e+06	High	High	High	High	High	High	1
High	Master Protein	C3S7G5	Oleosin OS=Brassica napus OX=3708 GN=S3 PE=2 SV=1	0	94.401	44	11	131	7	186	20.6	9.17	341	129.2	10	11		membrane		Pf01277	106407644	GSBRNA2T00154490001	LOC106407644	C7		0	2	6.03882e+07	6.898e+07	8.28659e+07	1.02275e+08	1.02542e+08	9.85946e+07	High	High	High	High	High	High	1
High	Master Protein	A0A078I6X6	BnaA07g10560D protein OS=Brassica napus OX=3708 GN=BnaA07g10560D PE=3 SV=1	0	94.389	38	10	52	3	253	28.7	4.81	219	60.73	9	8			protein binding	Pf00244		GSBRNA2T00085924001				0	8	4.32161e+07	4.62992e+07	3.87882e+07	3.88558e+07	4.86462e+07	5.04237e+07	High	High	High	High	High	High	1
High	Master Protein	A0A078IYZ4	Phosphogluconate dehydrogenase (NADP(+)-dependent, decarboxylating) OS=Brassica napus OX=3708 GN=BnaA05g33580D PE=3 SV=1	0	94.234	33	10	78	2	404	44.5	5.82	363	106.62	10	8	metabolic process		catalytic activity	Pf00393, Pf03446		GSBRNA2T00022306001				0	0							High	High	High	High	High	High	1
High	Master Protein	C3S7E9	Oleosin OS=Brassica napus OX=3708 GN=S1 PE=2 SV=1	0	94.108	27	7	136	6	193	20.8	8.5	445	141.85	7	7		membrane		Pf01277, Pf05957	106438893		LOC106438893	A3		0	1	1.47966e+08	1.6219e+08	1.59141e+08	1.75122e+08	1.92841e+08	1.91768e+08	High	High	High	High	High	High	1
High	Master Protein	A0A078HBL5	Glyceraldehyde-3-phosphate dehydrogenase OS=Brassica napus OX=3708 GN=BnaA08g04610D PE=3 SV=1	0	94.065	28	10	53	9	448	47.5	7.2	265	71.45	10	9	metabolic process		catalytic activity;nucleotide binding	Pf00044, Pf02672, Pf02800		GSBRNA2T00059297001				0	2	1.29809e+07	1.23551e+07	1.04844e+07	1.11667e+07	1.30741e+07	1.34906e+07	High	High	High	High	High	High	1
High	Master Protein	A0A078I415	BnaC02g00800D protein OS=Brassica napus OX=3708 GN=BnaC02g00800D PE=3 SV=1	0	93.811	19	14	76	1	790	84.9	6.74	253	101.67	13	12	cell organization and biogenesis;metabolic process	membrane	nucleotide binding;protein binding	Pf00012, Pf06723		GSBRNA2T00080816001				0	0	4.6976e+06	4851060	3.79614e+06	3.84098e+06	4.45678e+06	4768054	High	High	High	High	High	High	1
High	Master Protein	A0A078IT43	BnaA06g40510D protein OS=Brassica napus OX=3708 GN=BnaA06g40510D PE=4 SV=1	0	93.806	18	14	57	2	831	93.7	8.15	219	73.82	14	12	transport		protein binding;structural molecule activity	Pf00400, Pf04053		GSBRNA2T00008721001				0	0	447236	443769	310686	365946	432129	465534	High	High	High	High	High	High	1
High	Master Protein	A0A078GE10	BnaA06g01990D protein OS=Brassica napus OX=3708 GN=BnaA06g01990D PE=3 SV=1	0	93.762	18	12	33	3	982	103.8	5.72	168	43.72	12	9				Pf01419		GSBRNA2T00021238001				0	0	1.06727e+06	1.10942e+06	897361	970896	1.26079e+06	1.27031e+06	High	High	High	High	High	High	1
High	Master Protein	A0A078I2L0	BnaC03g14720D protein OS=Brassica napus OX=3708 GN=BnaC03g14720D PE=3 SV=1	0	93.716	26	9	56	7	364	39.7	5.67	236	67.96	9	9	metabolic process		catalytic activity;protein binding	Pf00891, Pf08100, Pf12847, Pf13489	106437132; 106437536	GSBRNA2T00077361001	LOC106437132; LOC106437536	A3; C3	Biosynthesis of secondary metabolites; Metabolic pathways; Phenylpropanoid biosynthesis	3	3	5.53033e+07	5.37482e+07	4.50102e+07	4.80403e+07	5.62455e+07	6.12457e+07	High	High	High	High	High	High	1
High	Master Protein	A0A078J0B8	BnaC04g55940D protein OS=Brassica napus OX=3708 GN=BnaC04g55940D PE=3 SV=1	0	93.643	14	7	49	7	746	81.1	6.79	285	70.57	7	7	metabolic process	membrane	catalytic activity	Pf00111, Pf00384, Pf09326, Pf10588, Pf13510		GSBRNA2T00019417001				0	0	1.23184e+07	1.24085e+07	1.05141e+07	1.08027e+07	1.27992e+07	1.31107e+07	High	High	High	High	High	High	1
High	Master Protein	A0A078J5A8	Valyl-tRNA synthetase OS=Brassica napus OX=3708 GN=BnaA09g56940D PE=3 SV=1	0	93.57	19	18	43	9	1101	124.8	6.96	159	40.9	18	13	metabolic process;regulation of biological process	cytoplasm	catalytic activity;nucleotide binding	Pf00133, Pf08264, Pf09334, Pf13603		GSBRNA2T00026068001				0	10	2.71723e+07	2.82459e+07	2.26444e+07	2.49169e+07	2.84173e+07	3.0415e+07	High	High	High	High	High	High	1
High	Master Protein	A0A078GPW1	BnaA09g35650D protein OS=Brassica napus OX=3708 GN=BnaA09g35650D PE=3 SV=1	0	93.351	49	13	43	7	289	32.7	5.34	201	54.36	13	12	transport		protein binding	Pf13424, Pf14938	106368100	GSBRNA2T00037111001	LOC106368100	A9		0	6	1.83893e+07	1.90686e+07	1.51329e+07	1.69735e+07	2.02937e+07	2.11829e+07	High	High	High	High	High	High	1
High	Master Protein	Q96350	Catalase OS=Brassica napus OX=3708 GN=LSC650 PE=2 SV=2	0	92.68	25	8	58	7	492	56.8	7.81	306	69.1	8	5	metabolic process;response to stimulus		antioxidant activity;catalytic activity;metal ion binding	Pf00199, Pf06628	106358221		LOC106358221	A7	Glyoxylate and dicarboxylate metabolism; Carbon metabolism; Tryptophan metabolism; MAPK signaling pathway - plant; Biosynthesis of secondary metabolites; Peroxisome	6	0	6.31773e+07	6.03679e+07	5.48861e+07	4.9193e+07	5.96315e+07	6.03684e+07	High	High	High	High	High	High	1
High	Master Protein	A0A078H653	UDP-arabinopyranose mutase OS=Brassica napus OX=3708 GN=BnaC03g27900D PE=3 SV=1	0	92.343	37	10	62	10	359	41.1	5.85	264	87.7	10	7	metabolic process		catalytic activity	Pf03214	106388463	GSBRNA2T00055892001	LOC106388463	C3		0	0	3.95323e+07	4.47605e+07	3.39786e+07	2.8077e+07	3.32238e+07	3.42865e+07	High	High	High	High	High	High	1
High	Master Protein	A0A078IMJ8	BnaC07g47930D protein OS=Brassica napus OX=3708 GN=BnaC07g47930D PE=3 SV=1	0	92.109	29	8	55	4	310	35.7	9.29	245	85.48	8	7	metabolic process	ribosome	RNA binding;structural molecule activity	Pf00861, Pf14204		GSBRNA2T00096250001				0	0	8.27133e+06	8.72223e+06	7.92384e+06	8.06979e+06	9.26192e+06	9.55175e+06	High	High	High	High	High	High	1
High	Master Protein	A0A078GZ27	BnaA03g48640D protein OS=Brassica napus OX=3708 GN=BnaA03g48640D PE=4 SV=1	0	92.062	20	14	47	6	600	67.7	9.14	162	60.83	14	13	regulation of biological process	endoplasmic reticulum;membrane		Pf13166		GSBRNA2T00044278001				0	9	5.03925e+07	4.94118e+07	4.28177e+07	4.59649e+07	5.74776e+07	5.99998e+07	High	High	High	High	High	High	1
High	Master Protein	A0A078HYA5	BnaC02g09300D protein OS=Brassica napus OX=3708 GN=BnaC02g09300D PE=3 SV=1	0	91.972	21	11	45	3	717	80.9	8.81	208	66.99	11	8	metabolic process;regulation of biological process;response to stimulus;transport	cytoplasm	catalytic activity;nucleotide binding;RNA binding	Pf00004, Pf00025, Pf00071, Pf00910, Pf01057, Pf01078, Pf05496, Pf06068, Pf07724, Pf07726, Pf07728, Pf08477, Pf13191, Pf13207, Pf13401		GSBRNA2T00074567001				0	9	9.73505e+06	9.99307e+06	8.30171e+06	8.33384e+06	1.04421e+07	9.86789e+06	High	High	High	High	High	High	1
High	Master Protein	A0A078H6S5	BnaA01g13780D protein OS=Brassica napus OX=3708 GN=BnaA01g13780D PE=3 SV=1	0	91.92	20	14	66	5	625	67	4.92	216	71.95	14	13	cell organization and biogenesis;metabolic process		nucleotide binding;protein binding	Pf00012, Pf03980, Pf06406, Pf06723		GSBRNA2T00056306001				0	0	8.5644e+06	9.06302e+06	7.08792e+06	6.51787e+06	7.50422e+06	8.04369e+06	High	High	High	High	High	High	1
High	Master Protein	A0A078I9P7	BnaA08g01750D protein OS=Brassica napus OX=3708 GN=BnaA08g01750D PE=3 SV=1	0	91.707	23	10	50	1	502	54.1	6.4	219	52.94	10	9	metabolic process		catalytic activity;metal ion binding	Pf00675, Pf05193		GSBRNA2T00085748001				0	12	1.70277e+07	1.81843e+07	1.43869e+07	1.40307e+07	1.63683e+07	1.7769e+07	High	High	High	High	High	High	1
High	Master Protein	A0A078FNX7	BnaC03g48970D protein OS=Brassica napus OX=3708 GN=BnaC03g48970D PE=3 SV=1	0	91.635	38	7	62	2	248	27.9	4.89	279	101.65	7	7			protein binding	Pf00244	106418429	GSBRNA2T00079304001	LOC106418429	C3		0	5	3.2717e+07	3.12099e+07	2.8597e+07	3.32705e+07	3.53569e+07	3.90583e+07	High	High	High	High	High	High	1
High	Master Protein	A0A078IIH2	Oleosin OS=Brassica napus OX=3708 GN=BnaA02g29000D PE=3 SV=1	0	91.566	40	8	125	4	188	20	9.17	450	121.56	8	6		membrane		Pf01277		GSBRNA2T00093775001				0	0	1.56713e+07	1.66381e+07	1.62964e+07	2.09359e+07	2.17621e+07	2.25723e+07	High	High	High	High	High	High	1
High	Master Protein	A0A078F735	Transcription elongation factor spt6 OS=Brassica napus OX=3708 GN=BnaA07g25270D PE=3 SV=1	0	91.408	12	16	42	2	1594	179.6	5.12	173	46.68	16	16	metabolic process;regulation of biological process		DNA binding	Pf09371, Pf12836, Pf14633, Pf14635, Pf14639, Pf14878		GSBRNA2T00124443001				0	14	7.64709e+06	7.73872e+06	6.35752e+06	6.6273e+06	7.23266e+06	8.09744e+06	High	High	High	High	High	High	1
High	Master Protein	A0A078IR47	BnaA05g33430D protein OS=Brassica napus OX=3708 GN=BnaA05g33430D PE=3 SV=1	0	91.242	46	12	92	1	261	29.4	4.78	327	111.58	11	12			protein binding	Pf00244	106453223	GSBRNA2T00003647001	LOC106453223	A5		0	0	901250	961924	797115	678892	865419	941657	High	High	High	High	High	High	1
High	Master Protein	A0A078IB61	Malate dehydrogenase OS=Brassica napus OX=3708 GN=BnaCnng15110D PE=3 SV=1	0	90.878	24	7	43	1	470	50.1	9.2	219	39.8	7	5	metabolic process	membrane	catalytic activity	Pf00056, Pf01073, Pf02866		GSBRNA2T00087308001				0	6	6.13023e+07	6.35028e+07	4.6159e+07	5.20014e+07	6.07779e+07	6.85968e+07	High	High	High	High	High	High	1
High	Master Protein	A0A078IFI5	BnaA06g33590D protein OS=Brassica napus OX=3708 GN=BnaA06g33590D PE=3 SV=1	0	90.645	19	11	44	4	787	89.4	5.07	180	50.44	11	11	metabolic process;response to stimulus		nucleotide binding;protein binding	Pf00183		GSBRNA2T00088740001				0	7	1.03009e+07	1.12228e+07	8.17311e+06	9.03832e+06	9.6263e+06	1.08732e+07	High	High	High	High	High	High	1
High	Master Protein	A0A078H6W5	11S globulin OS=Brassica napus OX=3708 GN=BnaA09g50780D PE=3 SV=1	0	90.626	21	9	112	1	496	54.8	7.08	487	115.18	8	9				Pf00190, Pf07333		GSBRNA2T00052502001				0	0	7.25837e+06	8.11098e+06	6.97228e+06	7.7655e+06	8.41935e+06	9.2939e+06	High	High	High	High	High	High	1
High	Master Protein	A0A078GVL1	BnaCnng05840D protein OS=Brassica napus OX=3708 GN=BnaCnng05840D PE=3 SV=1	0	90.547	46	12	89	1	261	29.4	4.78	316	106.91	11	12			protein binding	Pf00244		GSBRNA2T00041333001				0	13	5.14468e+07	5.36744e+07	4.34485e+07	4.30848e+07	4.94477e+07	5.67955e+07	High	High	High	High	High	High	1
High	Master Protein	A0A078H8F8	BnaA09g41570D protein OS=Brassica napus OX=3708 GN=BnaA09g41570D PE=3 SV=1	0	90.543	23	8	81	4	515	53.9	5.68	348	95.05	8	7	metabolic process	cytoplasm	catalytic activity;metal ion binding	Pf00883, Pf02789		GSBRNA2T00057335001				0	0	5.76676e+06	6.02169e+06	4.67391e+06	4.87508e+06	6.08044e+06	6.80421e+06	High	High	High	High	High	High	1
High	Master Protein	A0A078H8V3	Annexin OS=Brassica napus OX=3708 GN=BnaC02g43450D PE=3 SV=1	0	89.957	39	11	74	6	316	36.1	6.55	257	79.18	11	9			metal ion binding	Pf00191	106380161	GSBRNA2T00055846001	LOC106380161	C3		0	0	2.19218e+07	2.37208e+07	1.51504e+07	1.65506e+07	1.91694e+07	2.12202e+07	High	High	High	High	High	High	1
High	Master Protein	A0A078HKT0	Pyruvate dehydrogenase E1 component subunit alpha OS=Brassica napus OX=3708 GN=BnaC08g46110D PE=4 SV=1	0	89.765	30	12	101	3	423	46.6	7.49	356	111.37	12	11	metabolic process		catalytic activity	Pf00676, Pf01765, Pf02775		GSBRNA2T00064060001				0	10	3.11654e+07	3.2945e+07	2.71754e+07	2.87344e+07	3.14017e+07	3.40847e+07	High	High	High	High	High	High	1
High	Master Protein	D1L8M3	ATP synthase subunit alpha OS=Brassica napus OX=3708 GN=atpA PE=3 SV=1	0	89.647	24	10	89	9	507	55.3	5.2	397	129.94	10	9	metabolic process;transport	membrane	catalytic activity;nucleotide binding;transporter activity	Pf00006, Pf00306, Pf02874, Pf09378	11542086		atpA		Metabolic pathways; Oxidative phosphorylation; Photosynthesis	3	0	3.18723e+07	3.42277e+07	2.74747e+07	2.71956e+07	3.3174e+07	3.43897e+07	High	High	High	High	High	High	1
High	Master Protein	A0A078GNT1	Sinigrinase OS=Brassica napus OX=3708 GN=BnaA09g26590D PE=3 SV=1	0	89.096	23	12	91	1	545	62.4	7.21	331	77.05	12	9	metabolic process		catalytic activity	Pf00232		GSBRNA2T00035009001				0	0	1.02714e+06	1.13619e+06	984115	1.02548e+06	1.12263e+06	1.21858e+06	High	High	High	High	High	High	1
High	Master Protein	A0A078IZP9	BnaA02g20240D protein (Fragment) OS=Brassica napus OX=3708 GN=BnaA02g20240D PE=3 SV=1	0	89.093	7	13	37	13	2449	266.9	7.12	162	52.06	13	13	regulation of biological process;response to stimulus		enzyme regulator activity;protein binding	Pf12074		GSBRNA2T00017872001				0	0	1.05505e+07	1.06317e+07	9.60766e+06	1.0123e+07	1.08303e+07	1.18382e+07	High	High	High	High	High	High	1
High	Master Protein	A0A078I2I8	Alanine--tRNA ligase OS=Brassica napus OX=3708 GN=BnaA08g02200D PE=3 SV=1	0	89.026	14	12	34	2	993	109.3	6.25	148	47.37	12	11	metabolic process	cytoplasm;mitochondrion	catalytic activity;metal ion binding;nucleotide binding;RNA binding	Pf01411, Pf02272, Pf07973		GSBRNA2T00081313001				0	0	2.266e+06	2.09918e+06	1.8519e+06	2.10358e+06	2.19638e+06	2.25955e+06	High	High	High	High	High	High	1
High	Master Protein	A0A078G1F2	Eukaryotic translation initiation factor 5B OS=Brassica napus OX=3708 GN=BnaC02g24310D PE=4 SV=1	0	89.001	12	13	40	2	1217	134.1	5.34	189	53.2	13	12			catalytic activity;nucleotide binding	Pf00009, Pf11987, Pf14578		GSBRNA2T00012410001				0	11	7.32959e+06	7.51464e+06	6.17871e+06	6.21881e+06	7.4744e+06	7.91216e+06	High	High	High	High	High	High	1
High	Master Protein	A0A078JUA4	BnaAnng29600D protein OS=Brassica napus OX=3708 GN=BnaAnng29600D PE=3 SV=1	0	88.93	38	9	50	2	253	28.7	4.79	242	61.71	9	7			protein binding	Pf00244		GSBRNA2T00083868001				0	0	2.22731e+06	2.30104e+06	1.78487e+06	1.88891e+06	2.26301e+06	2.34462e+06	High	High	High	High	High	High	1
High	Master Protein	A0A078J8R8	Malate dehydrogenase OS=Brassica napus OX=3708 GN=BnaA06g38600D PE=3 SV=1	0	88.193	29	7	36	1	400	42.1	8.34	196	39.8	7	5	metabolic process		catalytic activity	Pf00056, Pf01073, Pf02866		GSBRNA2T00033625001				0	0	426195	414427	366118	299767	360623	349218	High	High	High	High	High	High	1
High	Master Protein	A0A078J576	Aldehyde dehydrogenase (NAD(+)) OS=Brassica napus OX=3708 GN=BnaC03g78230D PE=3 SV=1	0	87.958	27	7	30	7	504	53.6	5.44	237	30.38	7	4	metabolic process		catalytic activity	Pf00171		GSBRNA2T00033883001				0	0	2.2709e+07	2.24469e+07	1.82599e+07	2.0317e+07	2.29854e+07	2.51803e+07	High	High	High	High	High	High	1
High	Master Protein	P33522	Cruciferin CRU4 OS=Brassica napus OX=3708 GN=CRU4 PE=1 SV=1	0	87.909	25	9	223	1	465	51.3	7.83	1314	132.52	9	6		endoplasmic reticulum		Pf00190, Pf07883	106370953		LOC106370953	A10		0	0	1.21727e+08	1.44654e+08	1.61371e+08	1.70955e+08	1.68026e+08	1.63463e+08	High	High	High	High	High	High	1
High	Master Protein	A0A078IJY5	Tubulin beta chain OS=Brassica napus OX=3708 GN=BnaA04g28540D PE=3 SV=1	0	87.777	25	9	112	4	449	50.6	4.83	445	116.54	9	7	cell organization and biogenesis	cytoplasm;cytoskeleton	catalytic activity;nucleotide binding;structural molecule activity	Pf00091, Pf03953, Pf10644	106389554; 106446933; 106446973	GSBRNA2T00003267001; GSBRNA2T00105212001	LOC106389554; LOC106446933; LOC106446973	A9; A4; C4	Phagosome	1	0	2.61908e+07	2.71383e+07	2.50685e+07	2.29465e+07	2.59892e+07	2.56926e+07	High	High	High	High	High	High	1
High	Master Protein	A0A078ITA5	BnaA03g57860D protein OS=Brassica napus OX=3708 GN=BnaA03g57860D PE=3 SV=1	0	87.547	27	8	65	1	326	37.4	9.23	252	81.6	8	8	metabolic process	ribosome	RNA binding;structural molecule activity	Pf00861, Pf14204		GSBRNA2T00006706001				0	0	1.66511e+06	1.632e+06	1.38836e+06	1.37974e+06	1.54777e+06	1.85053e+06	High	High	High	High	High	High	1
High	Master Protein	Q2F3K0	Oleosin OS=Brassica napus OX=3708 PE=3 SV=1	0	87.428	33	9	167	2	187	20.7	9.45	379	142.51	9	9		membrane		Pf01277, Pf11877	106442597		LOC106442597	A1		0	0	1.50161e+06	1.62885e+06	2.20931e+06	3.59056e+06	3.62386e+06	3.27586e+06	High	High	High	High	High	High	1
High	Master Protein	A0A078J4Z8	Protein disulfide-isomerase OS=Brassica napus OX=3708 GN=BnaC04g51940D PE=3 SV=1	0	87.413	30	12	57	12	361	39.5	6.32	200	75.05	12	12	cellular homeostasis;metabolic process;regulation of biological process	endoplasmic reticulum	antioxidant activity;catalytic activity	Pf00085, Pf00578, Pf07749, Pf13098, Pf13848, Pf13899, Pf13905	106396765	GSBRNA2T00022571001	LOC106396765	C4	Protein processing in endoplasmic reticulum	1	0	1.06359e+08	1.19681e+08	9.54902e+07	9.82948e+07	1.14946e+08	1.23599e+08	High	High	High	High	High	High	1
High	Master Protein	A0A078IVS9	BnaC06g43510D protein OS=Brassica napus OX=3708 GN=BnaC06g43510D PE=3 SV=1	0	87.361	27	8	87	8	388	41.7	5.52	351	111.82	8	7	metabolic process		catalytic activity	Pf00294	106348199	GSBRNA2T00017186001	LOC106348199	C2	Fructose and mannose metabolism; Metabolic pathways; Starch and sucrose metabolism; Amino sugar and nucleotide sugar metabolism	4	0	4.62472e+07	4.86225e+07	3.96009e+07	4.15216e+07	4.75615e+07	5.17975e+07	High	High	High	High	High	High	1
High	Master Protein	A0A078GFX0	[Acyl-carrier-protein] S-malonyltransferase OS=Brassica napus OX=3708 GN=BnaC03g16690D PE=4 SV=1	0	86.905	21	8	53	3	367	38.6	7.36	234	71.75	8	8	metabolic process		catalytic activity	Pf00698		GSBRNA2T00024543001				0	0	6.87703e+06	6.83426e+06	6.24565e+06	6.26091e+06	7.44171e+06	7.43792e+06	High	High	High	High	High	High	1
High	Master Protein	A0A078IG58	Transketolase OS=Brassica napus OX=3708 GN=BnaC04g22010D PE=3 SV=1	0	86.88	16	9	109	3	735	79.2	6.39	551	180.74	9	8	metabolic process		catalytic activity	Pf00456, Pf02775, Pf02779, Pf02780	106391893	GSBRNA2T00089365001	LOC106391893	C4	Carbon metabolism; Biosynthesis of amino acids; Carbon fixation in photosynthetic organisms; Pentose phosphate pathway; Biosynthesis of secondary metabolites; Metabolic pathways	6	0	2.68497e+07	2.71028e+07	2.49404e+07	2.40796e+07	2.94398e+07	3.06136e+07	High	High	High	High	High	High	1
High	Master Protein	A0A078HNW4	Transcription elongation factor spt6 OS=Brassica napus OX=3708 GN=BnaC06g27050D PE=3 SV=1	0	86.864	11	15	35	1	1596	179.7	5.15	150	42.51	15	15	metabolic process;regulation of biological process		DNA binding	Pf09371, Pf12836, Pf14633, Pf14635, Pf14639, Pf14878		GSBRNA2T00067523001				0	0	321238	361509	299896	296259	368748	384172	High	High	High	High	High	High	1
High	Master Protein	A0A078IS54	BnaA03g57870D protein OS=Brassica napus OX=3708 GN=BnaA03g57870D PE=3 SV=1	0	86.769	27	8	57	1	332	37.9	9.36	217	81.6	8	8	metabolic process	ribosome	RNA binding;structural molecule activity	Pf00861, Pf14204		GSBRNA2T00006707001				0	10	1.65177e+07	1.88906e+07	1.54091e+07	1.4086e+07	1.76066e+07	1.88727e+07	High	High	High	High	High	High	1
High	Master Protein	A0A078GLN7	2-isopropylmalate synthase OS=Brassica napus OX=3708 GN=BnaA06g12630D PE=3 SV=1	0	86.485	25	12	55	4	626	67.8	6.35	216	81.69	12	10	metabolic process		catalytic activity	Pf00682, Pf08502		GSBRNA2T00034807001				0	0	5.46765e+06	5.47211e+06	4.72385e+06	4.88521e+06	5.58106e+06	6.12543e+06	High	High	High	High	High	High	1
High	Master Protein	A0A078GP25	Poly [ADP-ribose] polymerase OS=Brassica napus OX=3708 GN=BnaC09g36510D PE=4 SV=1	0	86.257	18	14	34	14	808	90.9	5.33	164	48.71	14	13	metabolic process		catalytic activity	Pf00533, Pf00644, Pf05406, Pf08063		GSBRNA2T00036661001				0	0	7.90551e+06	8.03952e+06	7.07187e+06	8.55273e+06	9.34352e+06	1.00324e+07	High	High	High	High	High	High	1
High	Master Protein	A0A078H954	Glucose-6-phosphate isomerase OS=Brassica napus OX=3708 GN=BnaA01g13990D PE=3 SV=1	0	85.933	17	8	54	3	616	67	5.4	248	58.52	8	8	metabolic process		catalytic activity	Pf00342		GSBRNA2T00056331001				0	0	2.97152e+06	3.09104e+06	2.36473e+06	2.67624e+06	3.23373e+06	3.10065e+06	High	High	High	High	High	High	1
High	Master Protein	A0A078FFU6	Coatomer subunit beta' OS=Brassica napus OX=3708 GN=BnaA03g46120D PE=3 SV=1	0	85.913	14	11	47	5	927	104.4	4.89	182	60.78	11	10	transport	cytoplasm;Golgi;membrane	protein binding;structural molecule activity	Pf00400, Pf04053		GSBRNA2T00048884001				0	1	3.35537e+06	3.63237e+06	3.07557e+06	3.46956e+06	3.70241e+06	4.01548e+06	High	High	High	High	High	High	1
High	Master Protein	Q9FNT6	Long chain acyl-CoA synthetase OS=Brassica napus OX=3708 GN=acs6 PE=2 SV=1	0	85.525	11	7	31	7	693	76	6.68	171	49.48	7	7	metabolic process		catalytic activity	Pf00501	106372084		LOC106372084		Fatty acid degradation; Fatty acid biosynthesis; Peroxisome; Metabolic pathways; Fatty acid metabolism	5	0	1.82198e+07	1.82104e+07	1.47172e+07	1.52574e+07	1.87213e+07	2.08528e+07	High	High	High	High	High	High	1
High	Master Protein	A0A078IH32	BnaA08g11470D protein OS=Brassica napus OX=3708 GN=BnaA08g11470D PE=3 SV=1	0	85.483	22	6	31	6	461	50.4	7.03	166	53.6	6	5	metabolic process		catalytic activity	Pf00155	106361092; 106405750	GSBRNA2T00089477001; GSBRNA2T00040071001	LOC106361092; LOC106405750	C3; A6	Biosynthesis of amino acids; Metabolic pathways; Biosynthesis of secondary metabolites; Lysine biosynthesis	4	0	2.01418e+07	2.05452e+07	1.77363e+07	1.88163e+07	2.13615e+07	2.23708e+07	High	High	High	High	High	High	1
High	Master Protein	A0A078I4B0	BnaA05g28850D protein OS=Brassica napus OX=3708 GN=BnaA05g28850D PE=3 SV=1	0	85.446	22	7	46	4	406	44.6	10.24	203	55.5	7	7	metabolic process	ribosome	structural molecule activity	Pf00573, Pf14374		GSBRNA2T00080700001				0	4	2.51283e+07	2.41859e+07	2.20445e+07	2.16198e+07	2.53275e+07	2.56601e+07	High	High	High	High	High	High	1
High	Master Protein	A0A078IAL6	Coatomer subunit gamma OS=Brassica napus OX=3708 GN=BnaC03g66090D PE=3 SV=1	0	85.363	19	14	54	9	886	98.3	5.21	224	68.28	14	14	transport	cytoplasm;Golgi;membrane	structural molecule activity	Pf01602, Pf08752	106434464	GSBRNA2T00083587001	LOC106434464	C3		0	5	1.41654e+07	1.437e+07	1.27112e+07	1.41789e+07	1.64364e+07	1.76088e+07	High	High	High	High	High	High	1
High	Master Protein	A0A078G8H7	2-isopropylmalate synthase OS=Brassica napus OX=3708 GN=BnaA09g44550D PE=3 SV=1	0	85.316	29	15	51	7	627	68.1	6.7	190	61.22	15	12	metabolic process		catalytic activity	Pf00682, Pf08502		GSBRNA2T00016198001				0	8	2.23036e+07	2.21816e+07	1.87597e+07	1.95736e+07	2.29469e+07	2.43779e+07	High	High	High	High	High	High	1
High	Master Protein	A0A078GZX6	Succinate dehydrogenase [ubiquinone] flavoprotein subunit, mitochondrial OS=Brassica napus OX=3708 GN=BnaC07g16540D PE=3 SV=1	0	85.038	15	10	54	10	627	69	6.33	209	64.97	10	8	metabolic process;transport	membrane	catalytic activity;nucleotide binding	Pf00890, Pf02910	106390363	GSBRNA2T00046166001	LOC106390363	C7	Biosynthesis of secondary metabolites; Citrate cycle (TCA cycle); Carbon metabolism; Metabolic pathways; Oxidative phosphorylation	5	0	2.4946e+07	2.55391e+07	2.09206e+07	2.20564e+07	2.51238e+07	2.69428e+07	High	High	High	High	High	High	1
High	Master Protein	A0A078J5H8	BnaCnng32630D protein OS=Brassica napus OX=3708 GN=BnaCnng32630D PE=4 SV=1	0	84.922	12	10	36	1	971	106.7	6.39	153	54.35	10	9	metabolic process	cytoplasm	catalytic activity;nucleotide binding	Pf00288, Pf13528	106380439	GSBRNA2T00022891001	LOC106380439		Amino sugar and nucleotide sugar metabolism; Metabolic pathways	2	0	324795	318029	289696	353576	408213	434665	High	High	High	High	High	High	1
High	Master Protein	A0A078FUV8	Malate dehydrogenase OS=Brassica napus OX=3708 GN=BnaC05g02530D PE=3 SV=1	0	84.667	25	11	135	4	332	35.7	6.55	542	65.5	10	9	metabolic process		catalytic activity	Pf00056, Pf02866		GSBRNA2T00002760001				0	0	3.19836e+07	3.05069e+07	2.59235e+07	2.78694e+07	3.20224e+07	3.73626e+07	High	High	High	High	High	High	1
High	Master Protein	A0A078I8S4	Pyruvate dehydrogenase E1 component subunit beta OS=Brassica napus OX=3708 GN=BnaC03g16370D PE=4 SV=1	0	84.644	18	5	46	5	367	39.5	5.83	223	59.45	5	5	metabolic process	mitochondrion;organelle lumen	catalytic activity	Pf02779, Pf02780	106387520	GSBRNA2T00082751001	LOC106387520	C3	Biosynthesis of secondary metabolites; Citrate cycle (TCA cycle); Carbon metabolism; Metabolic pathways; Glycolysis / Gluconeogenesis; Pyruvate metabolism	6	0	1.52142e+07	1.56445e+07	1.27805e+07	1.31627e+07	1.56478e+07	1.62573e+07	High	High	High	High	High	High	1
High	Master Protein	A0A078GIV2	UDP-glucose 6-dehydrogenase OS=Brassica napus OX=3708 GN=BnaC09g42430D PE=3 SV=1	0	84.452	22	9	62	5	480	53	6.46	299	90.87	9	8	metabolic process		catalytic activity;nucleotide binding	Pf00984, Pf03720, Pf03721	106424732; 106424733	GSBRNA2T00035215001	LOC106424732; LOC106424733	C9	Ascorbate and aldarate metabolism; Amino sugar and nucleotide sugar metabolism; Metabolic pathways; Pentose and glucuronate interconversions	4	0	1.03937e+07	1.11833e+07	8.51707e+06	7.77419e+06	9.53738e+06	9.97364e+06	High	High	High	High	High	High	1
High	Master Protein	A0A078G0Q2	11S globulin OS=Brassica napus OX=3708 GN=BnaC05g02160D PE=3 SV=1	0	84.013	23	9	220	1	457	50.7	7.78	962	156.65	9	7				Pf00190, Pf07883		GSBRNA2T00002721001				0	9	3.09151e+08	3.64831e+08	3.10062e+08	4.15725e+08	4.23723e+08	4.19709e+08	High	High	High	High	High	High	1
High	Master Protein	A0A078I3L6	3-isopropylmalate dehydratase OS=Brassica napus OX=3708 GN=BnaA08g05070D PE=4 SV=1	0	83.979	23	7	43	2	504	54.5	7.71	230	37.14	7	6	metabolic process		catalytic activity	Pf00330	106433150	GSBRNA2T00077191001	LOC106433150	A8	Biosynthesis of secondary metabolites; Valine, leucine and isoleucine biosynthesis; 2-Oxocarboxylic acid metabolism; Biosynthesis of amino acids; C5-Branched dibasic acid metabolism; Metabolic pathways	6	6	1.47831e+07	1.53105e+07	1.20078e+07	1.34223e+07	1.6062e+07	1.72607e+07	High	High	High	High	High	High	1
High	Master Protein	A0A078FD14	BnaA03g00670D protein OS=Brassica napus OX=3708 GN=BnaA03g00670D PE=3 SV=1	0	83.974	20	6	47	1	392	43	10.14	241	71.25	6	6	metabolic process	ribosome	structural molecule activity	Pf00573, Pf14374		GSBRNA2T00049252001				0	3	5.07061e+06	5.36455e+06	4.75476e+06	4.32459e+06	5.64846e+06	5.43886e+06	High	High	High	High	High	High	1
High	Master Protein	A0A078GEK4	BnaC03g22220D protein OS=Brassica napus OX=3708 GN=BnaC03g22220D PE=4 SV=1	0	83.422	20	9	46	7	475	51.8	5.77	197	64.28	9	9			nucleotide binding	Pf00004, Pf06309		GSBRNA2T00028746001				0	2	1.00859e+07	9.81727e+06	8.26498e+06	9.00152e+06	1.03699e+07	1.0913e+07	High	High	High	High	High	High	1
High	Master Protein	A0A078H0J8	Importin subunit alpha OS=Brassica napus OX=3708 GN=BnaA01g17690D PE=3 SV=1	0	83.181	21	8	28	4	530	58.3	5.11	135	48.66	6	8	transport	cytoplasm;nucleus	protein binding;transporter activity	Pf00514, Pf01602, Pf01749, Pf02985, Pf13513, Pf13646	106446675	GSBRNA2T00051646001	LOC106446675	A1		0	4	5.29975e+06	5.18814e+06	4.2582e+06	5.17434e+06	5.76383e+06	6.24554e+06	High	High	High	High	High	High	1
High	Master Protein	A0A078J1M5	Acyl-coenzyme A oxidase OS=Brassica napus OX=3708 GN=BnaCnng35000D PE=3 SV=1	0	83.124	22	12	37	2	664	74.3	7.94	153	45.89	11	11	metabolic process		catalytic activity;nucleotide binding	Pf01756, Pf02770, Pf14749	106437075	GSBRNA2T00026158001	LOC106437075	C2	Biosynthesis of secondary metabolites; alpha-Linolenic acid metabolism; Fatty acid metabolism; Fatty acid degradation; Metabolic pathways; Biosynthesis of unsaturated fatty acids; Peroxisome	7	10	1.50313e+07	1.51227e+07	1.32104e+07	1.26642e+07	1.47668e+07	1.57695e+07	High	High	High	High	High	High	1
High	Master Protein	A0A078F507	CCT-eta OS=Brassica napus OX=3708 GN=BnaA05g27270D PE=3 SV=1	0	82.952	22	8	44	3	504	54.2	6.2	206	58.47	8	7	metabolic process	cytoplasm	nucleotide binding;protein binding	Pf00118		GSBRNA2T00000262001				0	5	2.73475e+07	2.786e+07	2.24574e+07	2.55688e+07	2.91694e+07	3.11564e+07	High	High	High	High	High	High	1
High	Master Protein	A0A078GJZ4	BnaC09g11740D protein OS=Brassica napus OX=3708 GN=BnaC09g11740D PE=4 SV=1	0	82.898	26	9	42	9	486	52.5	7.75	181	55.21	9	7	metabolic process		catalytic activity;nucleotide binding	Pf00070, Pf01266, Pf07992		GSBRNA2T00032806001				0	0	3.63243e+07	3.67816e+07	3.0071e+07	2.98166e+07	3.57016e+07	3.766e+07	High	High	High	High	High	High	1
High	Master Protein	A0A078FQR6	Pyruvate dehydrogenase E1 component subunit alpha OS=Brassica napus OX=3708 GN=BnaC05g00810D PE=4 SV=1	0	82.891	26	10	79	1	429	47.3	7.47	296	95.31	10	9	metabolic process		catalytic activity	Pf00676, Pf01765, Pf02775		GSBRNA2T00085388001				0	0	3.66715e+06	3.85092e+06	3.20104e+06	3.35663e+06	3.8569e+06	4.01377e+06	High	High	High	High	High	High	1
High	Master Protein	A0A078G6G8	BnaA08g25040D protein OS=Brassica napus OX=3708 GN=BnaA08g25040D PE=3 SV=1	0	82.787	18	7	64	1	526	56.6	5.59	312	89.13	7	7	metabolic process	membrane	catalytic activity	Pf00026, Pf03489, Pf05184, Pf14543		GSBRNA2T00015180001				0	0	242637	197831	222223	242997	229660	241881	High	High	High	High	High	High	1
High	Master Protein	Q7XB53	11S globulin (Fragment) OS=Brassica napus OX=3708 PE=1 SV=1	0	82.644	19	8	203	1	466	51.3	7.05	1032	147.86	8	7				Pf00190	106410435		LOC106410435	A9		0	1	8.42023e+07	1.03047e+08	1.03362e+08	1.66205e+08	1.67361e+08	1.54542e+08	High	High	High	High	High	High	1
High	Master Protein	A0A078I761	Eukaryotic translation initiation factor 5B OS=Brassica napus OX=3708 GN=BnaA02g17730D PE=4 SV=1	0	82.631	12	13	38	2	1147	126.2	5.78	178	52.43	13	11			catalytic activity;nucleotide binding	Pf00009, Pf11987, Pf14578		GSBRNA2T00082946001				0	0	247489	240986	211380	230090	265811	238756	High	High	High	High	High	High	1
High	Master Protein	A0A078H5V4	BnaA02g30470D protein OS=Brassica napus OX=3708 GN=BnaA02g30470D PE=3 SV=1	0	82.504	21	7	24	7	456	47.5	7.59	122	37.63	7	6	metabolic process		catalytic activity	Pf00108, Pf02803	106403192	GSBRNA2T00055454001	LOC106403192	A2	Fatty acid degradation; Valine, leucine and isoleucine degradation; alpha-Linolenic acid metabolism; Metabolic pathways; Biosynthesis of unsaturated fatty acids; Peroxisome; Biosynthesis of secondary metabolites; Fatty acid metabolism	8	0	23943745	2.37362e+07	2.3519e+07	2.1561e+07	2.57755e+07	2.81075e+07	High	High	High	High	High	High	1
High	Master Protein	T2C628	Phospholipase D OS=Brassica napus OX=3708 GN=PLD3 PE=2 SV=1	0	82.457	24	12	45	2	810	91.8	5.76	188	71.62	12	12	metabolic process	membrane	catalytic activity;metal ion binding;protein binding	Pf00168, Pf00614, Pf12357, Pf13091	106400840		LOC106400840	C5	Biosynthesis of secondary metabolites; Glycerophospholipid metabolism; Metabolic pathways; Endocytosis; Ether lipid metabolism	5	0	424187	459204	391097	380978	435640	462711	High	High	High	High	High	High	1
High	Master Protein	A0A078G6I2	Lactoylglutathione lyase OS=Brassica napus OX=3708 GN=BnaA08g25110D PE=3 SV=1	0	82.335	19	5	80	1	283	31.9	5.36	333	110.45	5	5			catalytic activity;metal ion binding	Pf00903, Pf12681, Pf13669	106362166	GSBRNA2T00015172001	LOC106362166	A8	Pyruvate metabolism	1	4	3.82239e+07	3.83724e+07	3.28654e+07	3.78338e+07	4.09045e+07	4.47144e+07	High	High	High	High	High	High	1
High	Master Protein	A0A078G2I6	Glycerophosphodiester phosphodiesterase OS=Brassica napus OX=3708 GN=BnaA05g20420D PE=4 SV=1	0	82.245	15	8	31	5	726	81.1	6.38	167	42.63	8	7	metabolic process		catalytic activity	Pf03009	106357490	GSBRNA2T00009308001	LOC106357490	A10		0	4	1.50832e+07	1.69328e+07	1.23683e+07	1.37147e+07	1.61012e+07	1.72046e+07	High	High	High	High	High	High	1
High	Master Protein	A0A078F8P7	Importin subunit alpha OS=Brassica napus OX=3708 GN=BnaC07g33450D PE=3 SV=1	0	82.169	16	7	40	1	535	58.8	5.24	231	65.87	6	7	transport	cytoplasm;nucleus	protein binding;transporter activity	Pf00514, Pf01602, Pf01749, Pf13513, Pf13646		GSBRNA2T00031389001				0	2	4.91927e+06	5.29045e+06	4.50266e+06	4.8699e+06	5.71089e+06	6.11454e+06	High	High	High	High	High	High	1
High	Master Protein	A0A078I1Z2	BnaA02g13970D protein OS=Brassica napus OX=3708 GN=BnaA02g13970D PE=3 SV=1	0	82.103	8	6	70	2	882	98.3	6.76	284	84.31	6	5	metabolic process		catalytic activity	Pf01055		GSBRNA2T00081032001				0	0	6.64269e+06	7.70018e+06	5.90072e+06	6.54462e+06	7.75506e+06	8.54057e+06	High	High	High	High	High	High	1
High	Master Protein	A0A078IL69	5-methyltetrahydropteroyltriglutamate--homocysteine S-methyltransferase OS=Brassica napus OX=3708 GN=BnaC05g48040D PE=3 SV=1	0	81.904	11	8	93	3	753	83.7	6.62	363	103.71	8	8	metabolic process		catalytic activity;metal ion binding	Pf01717, Pf08267		GSBRNA2T00097221001				0	0	6.49069e+07	6.3911e+07	5.24757e+07	5.26064e+07	6.09695e+07	6.23144e+07	High	High	High	High	High	High	1
High	Master Protein	A0A078H6R6	BnaC09g22180D protein OS=Brassica napus OX=3708 GN=BnaC09g22180D PE=3 SV=1	0	81.797	16	9	42	2	783	88.8	5.15	169	47.76	9	9	metabolic process;response to stimulus		nucleotide binding;protein binding	Pf00183		GSBRNA2T00053805001				0	0	1.4821e+06	1.71289e+06	1.17613e+06	1.27672e+06	1.52124e+06	1.6842e+06	High	High	High	High	High	High	1
High	Master Protein	A0A078H0E3	BnaC08g15160D protein OS=Brassica napus OX=3708 GN=BnaC08g15160D PE=3 SV=1	0	81.711	16	7	64	1	595	64.1	6.18	307	89.58	7	7	metabolic process	membrane	catalytic activity	Pf00026, Pf03489, Pf05184, Pf14543		GSBRNA2T00047351001				0	6	3.80675e+07	4.35787e+07	3.51226e+07	4.2741e+07	4.42427e+07	4.84423e+07	High	High	High	High	High	High	1
High	Master Protein	A0A078GAR7	BnaC01g39690D protein OS=Brassica napus OX=3708 GN=BnaC01g39690D PE=3 SV=1	0	81.604	17	13	48	5	804	91	5.49	169	56.44	13	12	metabolic process;response to stimulus		nucleotide binding;protein binding	Pf00183, Pf02518, Pf13589		GSBRNA2T00018522001				0	7	1.37749e+07	14116717	1.1334e+07	1.28296e+07	1.44496e+07	1.58501e+07	High	High	High	High	High	High	1
High	Master Protein	A0A078FDP4	Glucose-6-phosphate isomerase OS=Brassica napus OX=3708 GN=BnaA03g46830D PE=3 SV=1	0	81.585	20	9	55	4	613	66.8	5.6	233	66.28	9	9	metabolic process		catalytic activity	Pf00342		GSBRNA2T00048977001				0	5	1.4863e+07	1.5493e+07	1.33088e+07	1.37447e+07	1.49977e+07	1.65619e+07	High	High	High	High	High	High	1
High	Master Protein	A0A078IFB7	Transmembrane 9 superfamily member OS=Brassica napus OX=3708 GN=BnaA09g09910D PE=3 SV=1	0	81.295	10	5	38	5	657	74.4	7.59	175	57.16	5	5		membrane		Pf02990	106447124	GSBRNA2T00091606001	LOC106447124	A9		0	0	7.80295e+06	8.1877e+06	7.081e+06	7.05947e+06	8.63108e+06	9.01955e+06	High	High	High	High	High	High	1
High	Master Protein	A0A078H2E0	Succinate--CoA ligase [ADP-forming] subunit beta, mitochondrial OS=Brassica napus OX=3708 GN=BnaA07g00290D PE=3 SV=1	0	81.048	35	12	55	3	421	45.3	7.37	214	75.03	12	10	metabolic process	mitochondrion	catalytic activity;metal ion binding;nucleotide binding	Pf00549, Pf08442		GSBRNA2T00050760001				0	0	1.29386e+06	1.36618e+06	1.1267e+06	1.29385e+06	1.50263e+06	1.46344e+06	High	High	High	High	High	High	1
High	Master Protein	A0A078HGY9	UDP-glucose 6-dehydrogenase OS=Brassica napus OX=3708 GN=BnaC06g12620D PE=3 SV=1	0	80.967	22	9	53	5	480	53.1	5.83	264	84.32	9	8	metabolic process		catalytic activity;nucleotide binding	Pf00984, Pf03720, Pf03721	106406052	GSBRNA2T00063183001	LOC106406052	C6	Ascorbate and aldarate metabolism; Amino sugar and nucleotide sugar metabolism; Pentose and glucuronate interconversions; Metabolic pathways	4	4	2.77736e+07	3.00161e+07	2.50261e+07	2.37458e+07	2.73257e+07	2.89755e+07	High	High	High	High	High	High	1
High	Master Protein	A0A078H5B2	BnaA10g12420D protein OS=Brassica napus OX=3708 GN=BnaA10g12420D PE=3 SV=1	0	80.924	24	7	20	6	457	51.8	5.24	124	32.98	7	6		membrane		Pf01237		GSBRNA2T00053271001				0	2	8.13993e+06	8.6816e+06	7.38716e+06	7.71645e+06	8.90881e+06	9.40841e+06	High	High	High	High	High	High	1
High	Master Protein	A0A078J4S0	BnaAnng15790D protein OS=Brassica napus OX=3708 GN=BnaAnng15790D PE=4 SV=1	0	80.834	48	10	29	1	225	25.3	4.89	138	39.98	10	10	transport			Pf00638	106420149	GSBRNA2T00025500001	LOC106420149	C8		0	9	1.86409e+07	1.90453e+07	1.50967e+07	1.80209e+07	1.99193e+07	2.19403e+07	High	High	High	High	High	High	1
High	Master Protein	A0A078FW97	BnaA09g06900D protein OS=Brassica napus OX=3708 GN=BnaA09g06900D PE=3 SV=1	0	80.795	19	9	57	4	776	84	7.39	278	81.91	9	7	metabolic process		catalytic activity	Pf00933, Pf01915, Pf14310	106366244	GSBRNA2T00005788001	LOC106366244		Amino sugar and nucleotide sugar metabolism; Metabolic pathways	2	6	1.68255e+07	1.72516e+07	1.58059e+07	1.50861e+07	1.6801e+07	1.80147e+07	High	High	High	High	High	High	1
High	Master Protein	A0A078F627	BnaC08g45160D protein OS=Brassica napus OX=3708 GN=BnaC08g45160D PE=4 SV=1	0	80.442	49	10	31	1	225	25.2	4.82	137	38.18	10	10	transport			Pf00638		GSBRNA2T00031704001				0	0	14238.7	13435.9	11264.7	9085.57	10435.9	11269.9	High	High	High	High	High	High	1
High	Master Protein	A0A078FRX3	BnaA08g28710D protein OS=Brassica napus OX=3708 GN=BnaA08g28710D PE=4 SV=1	0	80.222	31	6	40	1	261	28	6.58	177	47.53	6	5	metabolic process		metal ion binding	Pf01789		GSBRNA2T00089770001				0	0	2.6947e+06	2.78573e+06	2.13727e+06	2.88673e+06	3.29574e+06	3.4411e+06	High	High	High	High	High	High	1
High	Master Protein	A0A078J2H4	Pectinesterase OS=Brassica napus OX=3708 GN=BnaCnng30140D PE=3 SV=1	0	80.133	26	8	53	1	517	56.3	8.62	380	60.16	8	5	cell organization and biogenesis;metabolic process;regulation of biological process		catalytic activity;enzyme regulator activity	Pf01095, Pf04043		GSBRNA2T00019458001				0	0	311826	410455	329413	387089	405541	444141	High	High	High	High	High	High	1
High	Master Protein	A0A078JTB5	BnaAnng35040D protein OS=Brassica napus OX=3708 GN=BnaAnng35040D PE=4 SV=1	0	80.063	36	13	33	13	297	32.3	5.73	129	44.72	13	12		membrane			106452107	GSBRNA2T00007519001	LOC106452107	A5		0	0	2.25487e+07	2.32363e+07	2.19687e+07	2.50251e+07	2.62819e+07	2.92662e+07	High	High	High	High	High	High	1
High	Master Protein	A0A078GSJ5	BnaA01g06850D protein OS=Brassica napus OX=3708 GN=BnaA01g06850D PE=4 SV=1	0	79.626	11	8	31	2	980	110	6.33	144	42.13	8	7	cell organization and biogenesis		protein binding	Pf00626, Pf02209		GSBRNA2T00039875001				0	0	57250.9	59358.7	55529.8	58875.2	57579.1	66576.2	High	High	High	High	High	High	1
High	Master Protein	A0A078IQH6	BnaAnng10840D protein OS=Brassica napus OX=3708 GN=BnaAnng10840D PE=4 SV=1	0	79.509	11	8	31	2	973	109.1	6.13	153	42.12	8	7	cell organization and biogenesis		protein binding	Pf00626, Pf02209, Pf15402		GSBRNA2T00003973001				0	6	4.98888e+06	5.27217e+06	4.2311e+06	4.32342e+06	5.10479e+06	5.5878e+06	High	High	High	High	High	High	1
High	Master Protein	A0A078IBD0	Proteasome subunit alpha type OS=Brassica napus OX=3708 GN=BnaA04g15540D PE=3 SV=1	0	79.411	44	9	43	9	249	27.3	6.55	168	53.72	9	7	metabolic process	cytoplasm;nucleus;proteasome	catalytic activity	Pf00227, Pf10584	106358451; 106396932	GSBRNA2T00118631001; GSBRNA2T00089005001	LOC106358451; LOC106396932	A7; C4	Proteasome	1	0	1.12358e+07	1.24284e+07	1.00732e+07	1.02744e+07	1.17456e+07	1.2567e+07	High	High	High	High	High	High	1
High	Master Protein	A0A078F5X4	Formate dehydrogenase, mitochondrial OS=Brassica napus OX=3708 GN=BnaC09g42760D PE=3 SV=1	0	79.402	26	10	52	10	383	42.2	7.56	224	52.06	10	9	metabolic process	mitochondrion	catalytic activity;nucleotide binding	Pf00389, Pf02826, Pf03720	106418386	GSBRNA2T00031641001	LOC106418386	C9	Carbon metabolism; Glyoxylate and dicarboxylate metabolism; Metabolic pathways	3	0	3.27572e+07	3.31681e+07	2.67716e+07	3.34818e+07	3.98885e+07	4.06445e+07	High	High	High	High	High	High	1
High	Master Protein	A0A078I2K9	40S ribosomal protein S8 OS=Brassica napus OX=3708 GN=BnaA02g04810D PE=3 SV=1	0	79.392	34	7	67	2	244	27.2	10.14	326	66.58	7	7	metabolic process	ribosome	structural molecule activity	Pf01201		GSBRNA2T00081375001				0	5	1.18005e+08	1.15312e+08	1.04514e+08	1.03328e+08	1.23587e+08	1.35229e+08	High	High	High	High	High	High	1
High	Master Protein	A0A078GA98	11S globulin OS=Brassica napus OX=3708 GN=BnaA06g36310D PE=3 SV=1	0	79.094	19	8	221	2	462	51.2	7.84	1075	154.35	8	6				Pf00190		GSBRNA2T00018778001				0	5	1.35829e+08	1.73126e+08	1.46183e+08	2.37081e+08	2.50429e+08	2.30946e+08	High	High	High	High	High	High	1
High	Master Protein	A0A078HR46	Coatomer subunit beta' OS=Brassica napus OX=3708 GN=BnaC06g05280D PE=3 SV=1	0	78.989	14	10	35	5	925	104.2	4.94	148	55.97	9	10	transport	cytoplasm;Golgi;membrane	protein binding;structural molecule activity	Pf00400, Pf04053		GSBRNA2T00069106001				0	2	4.02169e+06	3.94574e+06	3.58526e+06	3.78656e+06	4.25448e+06	4.48887e+06	High	High	High	High	High	High	1
High	Master Protein	P35480	Chaperonin CPN60, mitochondrial OS=Brassica napus OX=3708 PE=2 SV=1	0	78.962	22	11	51	2	587	62.3	8.13	184	51.78	11	9	metabolic process	cytoplasm;mitochondrion	nucleotide binding	Pf00118	106437789		LOC106437789	A3	RNA degradation	1	0	800079	922708	729262	747765	820703	964695	High	High	High	High	High	High	1
High	Master Protein	D1L8N4	Photosystem II CP43 reaction center protein OS=Brassica napus OX=3708 GN=psbC PE=3 SV=1	0	78.901	11	5	205	5	473	51.8	7.2	776	238.62	5	5	metabolic process	membrane	metal ion binding	Pf00421	11542068		psbC		Photosynthesis; Metabolic pathways	2	0	1.68383e+08	1.6386e+08	1.39955e+08	1.68593e+08	1.86661e+08	1.93724e+08	High	High	High	High	High	High	1
High	Master Protein	V9M3A3	Glutamine synthetase OS=Brassica napus OX=3708 GN=GLN1.3 PE=2 SV=1	0	78.735	35	8	45	3	354	38.6	6.87	174	47.64	8	6	metabolic process		catalytic activity;nucleotide binding	Pf00120, Pf03951	106439570		LOC106439570	A3	Nitrogen metabolism; Arginine biosynthesis; Glyoxylate and dicarboxylate metabolism; Biosynthesis of amino acids; Metabolic pathways; Alanine, aspartate and glutamate metabolism	6	5	2.80522e+07	2.86464e+07	2.62193e+07	2.31041e+07	2.60444e+07	2.64443e+07	High	High	High	High	High	High	1
High	Master Protein	A0A078I714	BnaA05g15080D protein OS=Brassica napus OX=3708 GN=BnaA05g15080D PE=3 SV=1	0	78.711	19	8	44	2	504	54.4	6.48	203	47.04	8	7	metabolic process		catalytic activity;metal ion binding	Pf00675, Pf05193	106451622; 106451624	GSBRNA2T00082394001	LOC106451622; LOC106451624	A5		0	0	1.31223e+06	1.35611e+06	1.08221e+06	1.0637e+06	1.16305e+06	1.27431e+06	High	High	High	High	High	High	1
High	Master Protein	A0A078GVU3	BnaC01g19310D protein OS=Brassica napus OX=3708 GN=BnaC01g19310D PE=3 SV=1	0	78.571	33	5	110	3	180	20.2	7.9	506	162.05	5	5				Pf00234	106445672	GSBRNA2T00042221001	LOC106445672	C1		0	0	1.50296e+07	1.43316e+07	1.64993e+07	1.70578e+07	1.89218e+07	2.08691e+07	High	High	High	High	High	High	1
High	Master Protein	A0A078HLZ9	26S proteasome non-ATPase regulatory subunit 2 homolog OS=Brassica napus OX=3708 GN=BnaC01g09980D PE=3 SV=1	0	78.557	15	13	57	4	892	97.7	5.19	167	56.89	13	13	regulation of biological process	proteasome	enzyme regulator activity	Pf01851		GSBRNA2T00065813001				0	0	6.26322e+06	6.33283e+06	5.90006e+06	6.15567e+06	6.7081e+06	7.24074e+06	High	High	High	High	High	High	1
High	Master Protein	A0A078GLU9	6-phosphogluconate dehydrogenase, decarboxylating OS=Brassica napus OX=3708 GN=BnaC09g11930D PE=3 SV=1	0	78.343	24	8	31	5	487	53.2	5.66	152	53.99	8	7	metabolic process		catalytic activity	Pf00393, Pf03446		GSBRNA2T00032829001				0	0	6.3378e+06	6.49337e+06	5.5546e+06	5.8342e+06	7.10329e+06	7.29281e+06	High	High	High	High	High	High	1
High	Master Protein	A0A078JW71	BnaCnng70910D protein OS=Brassica napus OX=3708 GN=BnaCnng70910D PE=4 SV=1	0	78.136	20	11	37	1	497	57.8	9.36	160	53.9	11	11						GSBRNA2T00010576001				0	0	274058	276382	232850	251403	284052	297542	High	High	High	High	High	High	1
High	Master Protein	A0A078FQL8	BnaC02g24950D protein OS=Brassica napus OX=3708 GN=BnaC02g24950D PE=3 SV=1	0	78.013	37	10	54	5	260	29.3	4.7	176	56.34	10	9			protein binding	Pf00244	106397868; 106418419	GSBRNA2T00084358001	LOC106397868; LOC106418419	A2; C9		0	0	404403	515381	476912	513334	449910	540441	High	High	High	High	High	High	1
High	Master Protein	A0A078FG04	BnaC06g14170D protein OS=Brassica napus OX=3708 GN=BnaC06g14170D PE=4 SV=1	0	77.817	29	10	28	9	434	46.5	5.88	134	32.36	10	9	cellular homeostasis;metabolic process;regulation of biological process		catalytic activity;nucleotide binding	Pf00070, Pf04820, Pf07992	106452428	GSBRNA2T00071341001	LOC106452428	C6	Metabolic pathways; Ascorbate and aldarate metabolism	2	1	2.53058e+07	2.65673e+07	2.36746e+07	2.14523e+07	2.63797e+07	2.65142e+07	High	High	High	High	High	High	1
High	Master Protein	A0A078F7E9	OMPdecase OS=Brassica napus OX=3708 GN=BnaC06g15260D PE=3 SV=1	0	77.768	17	6	34	2	470	51.4	6.64	159	55.68	6	5	metabolic process		catalytic activity	Pf00156, Pf00215		GSBRNA2T00124591001				0	4	2.77146e+07	2.53783e+07	2.09184e+07	2.30623e+07	2.5971e+07	2.65816e+07	High	High	High	High	High	High	1
High	Master Protein	A0A078FG65	Coatomer subunit beta OS=Brassica napus OX=3708 GN=BnaA03g51530D PE=4 SV=1	0	77.764	17	14	40	5	948	105.7	5.78	156	42.83	14	12	transport	cytoplasm;Golgi;membrane	structural molecule activity	Pf01602, Pf07718, Pf13646, Pf14806		GSBRNA2T00077726001				0	9	1.2842e+07	1.31876e+07	1.1204e+07	1.20139e+07	1.38254e+07	1.4934e+07	High	High	High	High	High	High	1
High	Master Protein	A0A078IAH0	Obg-like ATPase 1 OS=Brassica napus OX=3708 GN=BnaA08g05260D PE=3 SV=1	0	77.75	32	10	42	10	394	44.5	7.01	177	60.5	10	9		cytoplasm	catalytic activity;nucleotide binding	Pf00005, Pf01926, Pf02421, Pf06071		GSBRNA2T00086829001				0	0	1.67532e+07	1.77193e+07	1.47164e+07	1.51564e+07	1.69883e+07	1.88167e+07	High	High	High	High	High	High	1
High	Master Protein	A0A078HQ97	BnaA09g10630D protein OS=Brassica napus OX=3708 GN=BnaA09g10630D PE=4 SV=1	0	77.668	22	11	42	3	554	62.2	6.16	179	59.53	11	10			protein binding	Pf00515, Pf07719, Pf13414, Pf13424, Pf13432		GSBRNA2T00068623001				0	0	856997	860888	747850	840155	1.00486e+06	1.0585e+06	High	High	High	High	High	High	1
High	Master Protein	A0A078IZ96	BnaA09g52470D protein OS=Brassica napus OX=3708 GN=BnaA09g52470D PE=3 SV=1	0	77.582	32	6	56	1	249	28	4.89	234	87.46	6	6			protein binding	Pf00244	106441250	GSBRNA2T00014587001	LOC106441250	A2		0	0	684781	699977	590036	669972	723431	791257	High	High	High	High	High	High	1
High	Master Protein	A0A075FGI0	Phospholipase D (Fragment) OS=Brassica napus OX=3708 PE=2 SV=1	0	77.515	24	12	44	2	810	91.9	5.91	186	66.76	12	11	metabolic process	membrane	catalytic activity;metal ion binding;protein binding	Pf00168, Pf00614, Pf12357, Pf13091	106400840		LOC106400840	C5		0	12	1.829e+07	1.93192e+07	1.5848e+07	1.73112e+07	1.7832e+07	2.0935e+07	High	High	High	High	High	High	1
High	Master Protein	A0A0P0G2Y7	BnaA7.mtHSP70-1-like protein OS=Brassica napus OX=3708 PE=3 SV=1	0	77.364	8	9	38	1	1338	148	7.69	189	50.54	9	7	cell organization and biogenesis;metabolic process		nucleotide binding;protein binding	Pf00012, Pf06723, Pf12134						0	0	220765	175137	200276	161577	193751	210632	High	High	High	High	High	High	1
High	Master Protein	A0A078H5U8	BnaA02g30520D protein OS=Brassica napus OX=3708 GN=BnaA02g30520D PE=3 SV=1	0	77.276	24	11	24	11	613	69.3	6.25	118	32.43	11	9			metal ion binding	Pf05761		GSBRNA2T00055446001				0	0	9.63135e+06	9.91561e+06	7.85802e+06	8.73445e+06	9.93597e+06	1.13956e+07	High	High	High	High	High	High	1
High	Master Protein	V9M2V8	Glutamine synthetase OS=Brassica napus OX=3708 GN=GLN1.3 PE=2 SV=1	0	77.242	30	7	52	2	354	38.5	6.33	202	59.88	7	7	metabolic process		catalytic activity;nucleotide binding	Pf00120, Pf03951	106435967; 106452023	GSBRNA2T00101764001; GSBRNA2T00153866001	LOC106435967; LOC106452023	A6	Alanine, aspartate and glutamate metabolism; Biosynthesis of amino acids; Glyoxylate and dicarboxylate metabolism; Arginine biosynthesis; Nitrogen metabolism; Metabolic pathways	6	0	1.19732e+06	1.24609e+06	994528	1.02058e+06	1.17887e+06	1.26968e+06	High	High	High	High	High	High	1
High	Master Protein	A0A078GA48	Coatomer subunit beta' OS=Brassica napus OX=3708 GN=BnaC01g35560D PE=3 SV=1	0	77.232	14	11	43	6	988	111.2	4.92	168	53.02	11	9	transport	cytoplasm;Golgi;membrane	protein binding;structural molecule activity	Pf00400, Pf04053		GSBRNA2T00018207001				0	5	1.63252e+07	1.69178e+07	1.50374e+07	1.50637e+07	1.69659e+07	1.84803e+07	High	High	High	High	High	High	1
High	Master Protein	A0A078GQS1	BnaA05g31700D protein OS=Brassica napus OX=3708 GN=BnaA05g31700D PE=3 SV=1	0	77.045	32	11	40	1	424	47.4	5.03	174	49.48	11	10	metabolic process;regulation of biological process;response to stimulus	cytoplasm	catalytic activity;nucleotide binding;protein binding	Pf00004, Pf01078, Pf05496, Pf05673, Pf07724, Pf07726, Pf07728, Pf13191, Pf13401, Pf14532	106362024; 106401780	GSBRNA2T00038566001; GSBRNA2T00119980001	LOC106362024; LOC106401780	A5; C5	Proteasome	1	0	1.76858e+06	1.7716e+06	1.3883e+06	1.42575e+06	1.71868e+06	1.91225e+06	High	High	High	High	High	High	1
High	Master Protein	A0A078HPD4	BnaAnng05720D protein OS=Brassica napus OX=3708 GN=BnaAnng05720D PE=3 SV=1	0	76.958	36	9	43	1	246	27.7	6.28	202	67.78	8	8				Pf06884		GSBRNA2T00067903001				0	9	2.18739e+07	2.50174e+07	2.28515e+07	3.07314e+07	2.983e+07	2.89895e+07	High	High	High	High	High	High	1
High	Master Protein	A0A078GBB1	BnaC08g42630D protein OS=Brassica napus OX=3708 GN=BnaC08g42630D PE=4 SV=1	0	76.643	30	9	64	4	415	46.5	5.85	265	83.26	9	8	metabolic process		protein binding;RNA binding	Pf00043, Pf00647, Pf02798, Pf13409, Pf13410, Pf13417, Pf14497	106418372	GSBRNA2T00019298001	LOC106418372	C8		0	6	1.76698e+07	1.83213e+07	1.44236e+07	1.61663e+07	1.89648e+07	1.96641e+07	High	High	High	High	High	High	1
High	Master Protein	A0A078HKX6	(S)-2-hydroxy-acid oxidase OS=Brassica napus OX=3708 GN=BnaA01g29410D PE=3 SV=1	0	76.587	21	5	34	4	367	40.4	8.97	174	52.34	5	5	metabolic process		catalytic activity;nucleotide binding	Pf00478, Pf01070, Pf01645, Pf03060	106418144	GSBRNA2T00067280001	LOC106418144		Metabolic pathways; Peroxisome; Biosynthesis of secondary metabolites; Glyoxylate and dicarboxylate metabolism; Carbon metabolism	5	1	1.20532e+07	1.22386e+07	1.10215e+07	9.88084e+06	1.17651e+07	1.08021e+07	High	High	High	High	High	High	1
High	Master Protein	A0A078FRT2	BnaA08g28680D protein OS=Brassica napus OX=3708 GN=BnaA08g28680D PE=3 SV=1	0	76.519	26	9	49	9	379	42.4	5.68	177	69.21	9	9	metabolic process		catalytic activity	Pf00378, Pf13766		GSBRNA2T00089766001				0	0	2.2252e+07	2.39524e+07	2.00931e+07	2.02766e+07	2.28251e+07	2.50499e+07	High	High	High	High	High	High	1
High	Master Protein	A0A078HVC4	Adenosine kinase OS=Brassica napus OX=3708 GN=BnaA01g32050D PE=3 SV=1	0	76.488	25	7	34	4	344	37.7	5.45	177	54.91	7	6	metabolic process		catalytic activity	Pf00294		GSBRNA2T00072862001				0	3	1.45606e+07	1.39968e+07	1.14207e+07	1.24377e+07	1.38729e+07	1.51434e+07	High	High	High	High	High	High	1
High	Master Protein	A0A078G0H2	BnaAnng02470D protein OS=Brassica napus OX=3708 GN=BnaAnng02660D PE=3 SV=1	0	76.14	32	11	40	1	424	47.5	5.03	172	50.53	11	10	metabolic process;regulation of biological process;response to stimulus	cytoplasm	catalytic activity;nucleotide binding;protein binding	Pf00004, Pf01078, Pf05496, Pf05673, Pf07724, Pf07726, Pf07728, Pf13191, Pf13401, Pf14532		GSBRNA2T00005941001; GSBRNA2T00005967001				0	11	1.43115e+07	1.47184e+07	1.1356e+07	1.25034e+07	1.47812e+07	1.59443e+07	High	High	High	High	High	High	1
High	Master Protein	A0A078J7H4	BnaCnng34690D protein OS=Brassica napus OX=3708 GN=BnaCnng34690D PE=3 SV=1	0	76.111	36	9	42	1	246	27.7	6.28	160	72.14	7	8				Pf06884	106375368	GSBRNA2T00025880001	LOC106375368; BNACNNG34690D	C7		0	0	3.13204e+06	3.25003e+06	3.25632e+06	5940427	5.15693e+06	4.91676e+06	High	High	High	High	High	High	1
High	Master Protein	A0A078JLS2	BnaAnng27350D protein (Fragment) OS=Brassica napus OX=3708 GN=BnaAnng27350D PE=4 SV=1	0	75.755	19	12	41	2	666	72.9	5.27	159	52.62	12	12		membrane	metal ion binding;nucleotide binding	Pf00122, Pf00690, Pf00702, Pf12710, Pf13246		GSBRNA2T00074254001				0	0	2.07287e+06	2.10823e+06	1.87014e+06	2.07964e+06	2.34087e+06	2.7282e+06	High	High	High	High	High	High	1
High	Master Protein	A0A078GM81	Carbamoyl-phosphate synthase (glutamine-hydrolyzing) OS=Brassica napus OX=3708 GN=BnaA09g26580D PE=3 SV=1	0	75.642	10	12	37	12	1176	128.7	5.63	130	39.83	12	11	metabolic process		catalytic activity;metal ion binding;nucleotide binding	Pf00289, Pf02142, Pf02222, Pf02786, Pf02787, Pf07478, Pf08442, Pf08443, Pf13535, Pf15632		GSBRNA2T00035008001				0	0	1.59695e+07	1.57541e+07	1.39502e+07	1.39375e+07	1.69884e+07	1.84199e+07	High	High	High	High	High	High	1
High	Master Protein	A0A078IUB8	BnaC03g78020D protein OS=Brassica napus OX=3708 GN=BnaC03g78020D PE=3 SV=1	0	75.477	18	8	43	1	502	53.9	6.13	188	42.66	8	7	metabolic process		catalytic activity;metal ion binding	Pf00675, Pf05193		GSBRNA2T00010699001				0	0							High	High	High	High	High	High	1
High	Master Protein	A0A078H7S5	Malate dehydrogenase OS=Brassica napus OX=3708 GN=BnaA09g16400D PE=3 SV=1	0	75.344	28	13	80	2	332	35.5	6.55	291	52.46	12	9	metabolic process		catalytic activity	Pf00056, Pf02866		GSBRNA2T00053160001				0	11	1.26531e+08	1.34417e+08	1.11871e+08	1.16509e+08	1.36518e+08	1.42072e+08	High	High	High	High	High	High	1
High	Master Protein	A0A078FMW7	BnaA08g13550D protein OS=Brassica napus OX=3708 GN=BnaA08g13550D PE=3 SV=1	0	75.311	27	9	26	9	445	49.5	6.1	133	43.27	9	8	metabolic process	cytoplasm	catalytic activity;nucleotide binding;RNA binding	Pf00004, Pf00910, Pf05673, Pf07724, Pf07726, Pf07728, Pf13191, Pf13401		GSBRNA2T00078793001				0	0	8.13235e+06	7.8793e+06	6.6438e+06	7.07568e+06	8.429e+06	8.86912e+06	High	High	High	High	High	High	1
High	Master Protein	A0A078DAQ0	Tubulin beta chain OS=Brassica napus OX=3708 GN=BnaC03g75120D PE=3 SV=1	0	75.282	25	9	83	2	450	50.7	4.81	300	90.91	8	6	cell organization and biogenesis	cytoplasm;cytoskeleton	catalytic activity;nucleotide binding;structural molecule activity	Pf00091, Pf03953, Pf10644	106347558; 106347711; 106352755	GSBRNA2T00065335001; GSBRNA2T00109901001; GSBRNA2T00141471001; GSBRNA2T00144138001	LOC106347558; LOC106347711; LOC106352755	A6; C3	Phagosome	1	2	1.79098e+07	1.90511e+07	1.54778e+07	1.63273e+07	1.96729e+07	2.00992e+07	High	High	High	High	High	High	1
High	Master Protein	A0A078K3M7	BnaUnng05060D protein OS=Brassica napus OX=3708 GN=BnaUnng05060D PE=4 SV=1	0	75.229	46	6	73	2	171	16.4	5.66	349	42.32	6	4			RNA binding	Pf00076, Pf13893, Pf14259		GSBRNA2T00028107001				0	0	1.3453e+06	1.40173e+06	1.19753e+06	1.40584e+06	1.56348e+06	1.57053e+06	High	High	High	High	High	High	1
High	Master Protein	A0A078F6Q0	BnaA06g24520D protein OS=Brassica napus OX=3708 GN=BnaA06g24520D PE=3 SV=1	0	74.862	13	10	30	1	807	90.2	6.43	133	38.94	9	10	metabolic process		catalytic activity;metal ion binding	Pf01432		GSBRNA2T00000707001				0	5	1.60908e+06	1.78681e+06	1.52661e+06	1.50282e+06	1.75926e+06	1.86173e+06	High	High	High	High	High	High	1
High	Master Protein	A0A078G0C6	Pectinesterase OS=Brassica napus OX=3708 GN=BnaC04g04060D PE=3 SV=1	0	74.826	21	8	43	6	442	48.3	8.91	250	55.38	8	7	cell organization and biogenesis;metabolic process;regulation of biological process		catalytic activity;enzyme regulator activity	Pf01095, Pf04043		GSBRNA2T00006154001				0	2	2.13626e+07	2.41691e+07	1.63706e+07	1.48219e+07	1.62054e+07	1.87836e+07	High	High	High	High	High	High	1
High	Master Protein	A0A078I1Y7	Malate dehydrogenase OS=Brassica napus OX=3708 GN=BnaC09g17480D PE=3 SV=1	0	74.68	28	13	97	2	332	35.6	6.55	325	79.36	12	11	metabolic process		catalytic activity	Pf00056, Pf02866		GSBRNA2T00076925001				0	0	5.4754e+06	5.66196e+06	4.64566e+06	4.9903e+06	5.86751e+06	5.93454e+06	High	High	High	High	High	High	1
High	Master Protein	A0A078HQ29	40S ribosomal protein S3a OS=Brassica napus OX=3708 GN=BnaC03g33960D PE=3 SV=1	0	74.679	34	8	44	5	262	29.8	9.79	214	72.47	8	8	metabolic process	cytoplasm;ribosome	structural molecule activity	Pf01015	106388814	GSBRNA2T00071563001	LOC106388814	C3	Ribosome	1	4	9.51354e+06	9.61119e+06	8.36522e+06	8.2699e+06	1.01344e+07	1.11068e+07	High	High	High	High	High	High	1
High	Master Protein	A0A078GXN5	Lactoylglutathione lyase OS=Brassica napus OX=3708 GN=BnaC08g15100D PE=3 SV=1	0	74.44	19	5	65	1	283	31.8	5.36	290	91.59	5	5			catalytic activity;metal ion binding	Pf00903, Pf12681, Pf13669		GSBRNA2T00047345001				0	0	2.45162e+06	2.69318e+06	2.3366e+06	2.72163e+06	2.54399e+06	2.7637e+06	High	High	High	High	High	High	1
High	Master Protein	C3S7F2	Oleosin OS=Brassica napus OX=3708 GN=S4 PE=2 SV=1	0	74.352	30	6	68	2	210	22	9.55	282	81.93	6	6		membrane		Pf01277	106402820		LOC106402820	C6		0	0	2.95345e+07	2.96525e+07	3.71809e+07	3.54932e+07	3.64654e+07	3.52395e+07	High	High	High	High	High	High	1
High	Master Protein	A0A078IX48	BnaC04g54830D protein OS=Brassica napus OX=3708 GN=BnaC04g54830D PE=3 SV=1	0	74.339	15	12	69	5	923	103.3	8.63	262	74.85	12	10	regulation of biological process		protein binding	Pf02170, Pf02171, Pf08699		GSBRNA2T00019563001				0	0	6.98716e+06	6.64304e+06	5.68363e+06	6.25955e+06	7.16684e+06	7.75144e+06	High	High	High	High	High	High	1
High	Master Protein	A0A078IDN3	BnaA04g15560D protein OS=Brassica napus OX=3708 GN=BnaA04g15560D PE=3 SV=1	0	74.231	19	15	72	8	922	103	8.69	238	79.64	15	12	regulation of biological process		protein binding	Pf02170, Pf02171, Pf08699		GSBRNA2T00089007001				0	7	47269622	4.65517e+07	3.91031e+07	4.41306e+07	5.35823e+07	5.52911e+07	High	High	High	High	High	High	1
High	Master Protein	A0A078HP93	BnaC06g30160D protein OS=Brassica napus OX=3708 GN=BnaC06g30160D PE=3 SV=1	0	74.156	8	6	60	2	868	96.9	6.92	237	88.17	6	6	metabolic process		catalytic activity	Pf01055		GSBRNA2T00066277001				0	5	3.53918e+07	4.07041e+07	3.29199e+07	3.36232e+07	4.04502e+07	4.22735e+07	High	High	High	High	High	High	1
High	Master Protein	A0A078I1I6	Acyl-coenzyme A oxidase OS=Brassica napus OX=3708 GN=BnaA01g18160D PE=3 SV=1	0	73.803	19	11	37	1	664	74.3	8.06	133	48.72	10	11	metabolic process		catalytic activity;nucleotide binding	Pf00441, Pf01756, Pf02770, Pf14749		GSBRNA2T00075706001				0	0	1.03733e+06	1.10116e+06	886366	988688	1.75757e+06	1.1919e+06	High	High	High	High	High	High	1
High	Master Protein	U3MW26	Stearoyl-[acyl-carrier-protein] 9-desaturase OS=Brassica napus OX=3708 GN=DES5b PE=2 SV=1	0	73.627	31	12	75	8	393	44.7	6.18	275	90.39	12	8	metabolic process		catalytic activity;metal ion binding	Pf03405	106366808		LOC106366808		Fatty acid biosynthesis; Biosynthesis of unsaturated fatty acids; Fatty acid metabolism	3	4	1.54298e+08	1.64961e+08	1.30924e+08	1.40581e+08	1.54432e+08	1.7849e+08	High	High	High	High	High	High	1
High	Master Protein	A0A078FX41	BnaC01g26800D protein OS=Brassica napus OX=3708 GN=BnaC01g26800D PE=4 SV=1	0	73.503	28	6	49	6	284	30.9	8.02	241	87.25	6	6		membrane		Pf04536	106376613	GSBRNA2T00001732001	LOC106376613	C4		0	0	1.94414e+07	2.20532e+07	1.77832e+07	1.86373e+07	2.2292e+07	2.24921e+07	High	High	High	High	High	High	1
High	Master Protein	A0A078GWB5	Glycerophosphodiester phosphodiesterase (Fragment) OS=Brassica napus OX=3708 GN=BnaC05g32380D PE=4 SV=1	0	73.433	16	7	35	4	596	66.7	6.06	172	50	7	7	metabolic process		catalytic activity	Pf03009		GSBRNA2T00043041001				0	0	2.38217e+06	2.56766e+06	2.05291e+06	2.09844e+06	2.42402e+06	2.45895e+06	High	High	High	High	High	High	1
High	Master Protein	A0A078I347	6-phosphogluconate dehydrogenase, decarboxylating OS=Brassica napus OX=3708 GN=BnaCnng11100D PE=3 SV=1	0	73.37	22	8	38	1	487	53.3	5.92	171	45.84	8	8	metabolic process		catalytic activity	Pf00393, Pf03446	106446298	GSBRNA2T00080169001	LOC106446298		Metabolic pathways; Pentose phosphate pathway; Biosynthesis of secondary metabolites; Glutathione metabolism; Carbon metabolism	5	0	8038906	8.33071e+06	6823202	7543727	8.64147e+06	9.59176e+06	High	High	High	High	High	High	1
High	Master Protein	A0A078GVM9	BnaCnng06040D protein OS=Brassica napus OX=3708 GN=BnaCnng06040D PE=3 SV=1	0	73.246	20	8	34	8	436	47.5	6.3	133	44.83	8	8	metabolic process		catalytic activity	Pf01546, Pf07687		GSBRNA2T00041355001				0	0	2.09711e+07	2.27559e+07	1.81185e+07	1.99148e+07	2.24537e+07	2.60295e+07	High	High	High	High	High	High	1
High	Master Protein	A0A078GFG5	Amylomaltase OS=Brassica napus OX=3708 GN=BnaC04g01600D PE=3 SV=1	0	73.243	16	13	42	13	941	108	6.13	146	52.38	13	10	metabolic process		catalytic activity	Pf00686, Pf02446	106396022	GSBRNA2T00024311001	LOC106396022	C4	Metabolic pathways; Starch and sucrose metabolism	2	0	1.65761e+07	1.74179e+07	1.48613e+07	1.51705e+07	1.70977e+07	1.9971e+07	High	High	High	High	High	High	1
High	Master Protein	A0A078FG86	Citrulline--aspartate ligase OS=Brassica napus OX=3708 GN=BnaA03g46970D PE=3 SV=1	0	73.095	32	13	45	2	501	54.5	6.58	143	55.88	13	12	metabolic process		catalytic activity;nucleotide binding	Pf00764		GSBRNA2T00048994001				0	11	3.62458e+07	3.74353e+07	2.88608e+07	3.18255e+07	3.80715e+07	4.10051e+07	High	High	High	High	High	High	1
High	Master Protein	A0A078H7Q2	Beta-ketoacyl-[acyl-carrier-protein] synthase I OS=Brassica napus OX=3708 GN=BnaA06g36060D PE=3 SV=1	0	73.065	19	7	36	2	469	49.6	7.69	166	42.97	7	5	metabolic process		catalytic activity	Pf00109, Pf02801	106401779	GSBRNA2T00054708001	LOC106401779	A6	Metabolic pathways; Fatty acid metabolism; Fatty acid biosynthesis; Biotin metabolism	4	5	4.098e+07	4.31947e+07	3.85181e+07	3.57789e+07	4.44567e+07	4.28562e+07	High	High	High	High	High	High	1
High	Master Protein	A0A078GIG1	Seryl-tRNA synthetase OS=Brassica napus OX=3708 GN=BnaC02g39740D PE=4 SV=1	0	72.945	25	11	34	11	451	51.3	7.06	120	43.75	11	9	metabolic process	cytoplasm	catalytic activity;nucleotide binding	Pf00587, Pf02403		GSBRNA2T00028862001				0	0	1.19213e+07	1.17334e+07	1.02375e+07	1.11731e+07	1.25906e+07	1.36897e+07	High	High	High	High	High	High	1
High	Master Protein	C3S7G3	Oleosin OS=Brassica napus OX=3708 GN=S3 PE=2 SV=1	0	72.522	40	8	144	6	183	20	9.31	448	149.92	8	8		membrane		Pf01277	106361728	GSBRNA2T00049017001	LOC106361728	A3		0	0	5.90548e+07	7.18711e+07	8.4574e+07	1.01878e+08	1.02458e+08	9.89274e+07	High	High	High	High	High	High	1
High	Master Protein	A0A078FUB8	Adenosylhomocysteinase OS=Brassica napus OX=3708 GN=BnaA01g23510D PE=3 SV=1	0	72.446	17	7	114	2	508	55.8	5.87	293	145.42	7	7	metabolic process;transport		catalytic activity;nucleotide binding	Pf00670, Pf02254, Pf02826, Pf05221		GSBRNA2T00095912001; GSBRNA2T00002582001				0	0	3.28635e+06	3.34353e+06	2.6655e+06	2.52778e+06	2.91825e+06	3.36001e+06	High	High	High	High	High	High	1
High	Master Protein	A0A078JT18	BnaC06g41290D protein OS=Brassica napus OX=3708 GN=BnaC06g41290D PE=4 SV=1	0	72.403	21	8	26	3	524	58.5	5.17	112	30.31	7	7	cellular homeostasis;regulation of biological process		metal ion binding	Pf00085, Pf01216, Pf13098, Pf13848	106406302	GSBRNA2T00075945001	LOC106406302	C6	Protein processing in endoplasmic reticulum	1	6	3.89913e+06	3.96505e+06	3.13806e+06	3.26347e+06	3.69417e+06	3.81829e+06	High	High	High	High	High	High	1
High	Master Protein	A0A078FZE1	ATP-dependent 6-phosphofructokinase OS=Brassica napus OX=3708 GN=BnaA06g35220D PE=3 SV=1	0	72.352	25	10	38	10	444	48.9	6.43	153	40.56	10	9	metabolic process	cytoplasm	catalytic activity;metal ion binding;nucleotide binding	Pf00365	106401306	GSBRNA2T00001926001	LOC106401306	A6	Galactose metabolism; Carbon metabolism; Fructose and mannose metabolism; Biosynthesis of amino acids; Pentose phosphate pathway; Biosynthesis of secondary metabolites; Metabolic pathways; Glycolysis / Gluconeogenesis; RNA degradation	9	0	1.66168e+07	1.67845e+07	1.48246e+07	1.52468e+07	1.61843e+07	1.79609e+07	High	High	High	High	High	High	1
High	Master Protein	A0A078GD98	BnaC05g24360D protein OS=Brassica napus OX=3708 GN=BnaC05g24360D PE=3 SV=1	0	72.351	20	10	58	1	475	55.2	5.86	200	66.86	10	10	metabolic process;response to stimulus		nucleotide binding;protein binding	Pf00183		GSBRNA2T00019254001				0	1	1.82376e+06	1.74366e+06	1.62234e+06	1.56546e+06	1.767e+06	1.83738e+06	High	High	High	High	High	High	1
High	Master Protein	D8L1V9	Actin2.1 OS=Brassica napus OX=3708 PE=2 SV=1	0	72.259	35	9	91	4	377	41.8	5.49	378	125.37	9	8			nucleotide binding	Pf00022						0	0	2.48068e+06	2.55789e+06	2.18252e+06	2.28874e+06	2.59913e+06	2.91509e+06	High	High	High	High	High	High	1
High	Master Protein	A0A078FYE8	BnaA10g10070D protein OS=Brassica napus OX=3708 GN=BnaA10g10070D PE=4 SV=1	0	72.119	25	5	18	5	373	41.4	7.77	129	13.45	5	2				Pf03080, Pf14365		GSBRNA2T00095483001				0	0	4.12215e+06	4.35929e+06	3.23642e+06	4.77151e+06	5.10382e+06	5.78028e+06	High	High	High	High	High	High	1
High	Master Protein	A0A078HDC7	BnaC09g37640D protein OS=Brassica napus OX=3708 GN=BnaC09g37640D PE=3 SV=1	0	71.816	27	9	29	1	419	47.2	8.88	142	40.59	9	7	metabolic process;response to stimulus	cytoplasm	catalytic activity;nucleotide binding;RNA binding	Pf00004, Pf00910, Pf01057, Pf01078, Pf05496, Pf06068, Pf06414, Pf07724, Pf07726, Pf07728, Pf13191, Pf13207, Pf13401	106439479	GSBRNA2T00059351001	LOC106439479	C9	Proteasome	1	0	385627	400176	362152	253071	320156	390173	High	High	High	High	High	High	1
High	Master Protein	A0A078FMC9	BnaA08g14070D protein OS=Brassica napus OX=3708 GN=BnaA08g14070D PE=4 SV=1	0	71.641	18	11	38	8	622	70	9.06	140	50.91	11	9	regulation of biological process	endoplasmic reticulum;membrane		Pf13166		GSBRNA2T00078864001				0	0	1.34523e+07	1.35677e+07	1.17116e+07	1.42271e+07	1.79101e+07	1.7474e+07	High	High	High	High	High	High	1
High	Master Protein	A0A078JZQ8	BnaA02g36570D protein OS=Brassica napus OX=3708 GN=BnaA02g36570D PE=4 SV=1	0	71.565	19	11	37	1	497	57.8	9.41	153	51.17	11	11						GSBRNA2T00011744001				0	3	5.28745e+06	5.6141e+06	4.53679e+06	4.91487e+06	5.45858e+06	5.48964e+06	High	High	High	High	High	High	1
High	Master Protein	A0A078J7N1	BnaC07g50110D protein OS=Brassica napus OX=3708 GN=BnaC07g50110D PE=4 SV=1	0	71.373	13	10	41	3	869	96.8	6.3	171	56.94	10	10			nucleotide binding	Pf00012		GSBRNA2T00029985001				0	8	2.04467e+07	2.12304e+07	1.66543e+07	1.66806e+07	1.94975e+07	2.0365e+07	High	High	High	High	High	High	1
High	Master Protein	A0A078IR76	BnaA08g11640D protein OS=Brassica napus OX=3708 GN=BnaA08g11640D PE=3 SV=1	0	71.346	30	6	41	3	258	29	5.39	216	48.38	6	4	metabolic process		catalytic activity	Pf01596, Pf13578	106361053; 106361078	GSBRNA2T00004543001; GSBRNA2T00004433001	LOC106361053; LOC106361078	A8; C3	Phenylalanine metabolism; Metabolic pathways; Biosynthesis of secondary metabolites; Stilbenoid, diarylheptanoid and gingerol biosynthesis; Flavonoid biosynthesis; Phenylpropanoid biosynthesis	6	4	2.17897e+07	2.44221e+07	1.98557e+07	1.84553e+07	2.24256e+07	2.19988e+07	High	High	High	High	High	High	1
High	Master Protein	A0A078J612	N-acyl-L-amino-acid amidohydrolase OS=Brassica napus OX=3708 GN=BnaAnng17940D PE=3 SV=1	0	71.268	27	8	43	2	432	47.8	6.25	171	52.2	8	7	metabolic process	cytoplasm	catalytic activity	Pf01546, Pf07687		GSBRNA2T00034548001				0	7	2.16881e+07	2.37152e+07	1.96376e+07	1.96368e+07	2.63567e+07	2.37825e+07	High	High	High	High	High	High	1
High	Master Protein	A0A078GEJ9	26S proteasome non-ATPase regulatory subunit 1 homolog OS=Brassica napus OX=3708 GN=BnaC04g43310D PE=3 SV=1	0	71.263	11	10	44	10	1008	109.3	5.39	155	48.48	10	10	regulation of biological process	membrane;proteasome	enzyme regulator activity	Pf01851, Pf13646	106427681	GSBRNA2T00024153001	LOC106427681	C4	Proteasome	1	0	1.68824e+07	1.7083e+07	1.47895e+07	1.60599e+07	1.79893e+07	1.95164e+07	High	High	High	High	High	High	1
High	Master Protein	C3S7F8	Oleosin S3-1 OS=Brassica napus OX=3708 GN=S3 PE=2 SV=1	0	71.248	39	9	211	6	180	19.6	8.88	594	179.4	9	9		membrane		Pf01277	106361323		LOC106361323	A8		0	0	1.18321e+08	1.33641e+08	1.65077e+08	2.17539e+08	2.17428e+08	2.15412e+08	High	High	High	High	High	High	1
High	Master Protein	A0A078HTT5	Valyl-tRNA synthetase OS=Brassica napus OX=3708 GN=BnaC05g10820D PE=3 SV=1	0	71.246	13	11	33	3	1109	125.8	6.89	135	34.99	11	8	metabolic process;regulation of biological process	cytoplasm	catalytic activity;nucleotide binding	Pf00133, Pf08264, Pf09334, Pf13603		GSBRNA2T00072419001				0	0	1.26427e+06	1.31001e+06	1.06734e+06	1.22922e+06	1.34576e+06	1.36258e+06	High	High	High	High	High	High	1
High	Master Protein	A0A078IBF3	BnaA03g48490D protein OS=Brassica napus OX=3708 GN=BnaA03g48490D PE=3 SV=1	0	71.176	54	5	35	5	158	18.1	7.5	176	57.68	5	5				Pf00234		GSBRNA2T00085954001				0	0	7.42261e+06	8.57602e+06	7.02363e+06	1.29504e+07	14092075	1.36511e+07	High	High	High	High	High	High	1
High	Master Protein	A0A078I043	Geranylgeranyl reductase OS=Brassica napus OX=3708 GN=BnaC02g22900D PE=3 SV=1	0	70.896	24	9	35	9	466	51.8	8.98	144	49.97	9	8	metabolic process		catalytic activity;nucleotide binding	Pf01494	106430268	GSBRNA2T00074720001	LOC106430268	C2	Metabolic pathways; Porphyrin and chlorophyll metabolism; Biosynthesis of secondary metabolites; Terpenoid backbone biosynthesis	4	0	1.54771e+07	1.51566e+07	1.29647e+07	1.32626e+07	1.57248e+07	1.53566e+07	High	High	High	High	High	High	1
High	Master Protein	P18290	Photosystem II protein D1 OS=Brassica napus OX=3708 GN=psbA PE=3 SV=1	0	70.859	16	5	114	5	353	38.9	5.25	375	131.92	5	5	metabolic process;response to stimulus;transport	membrane	catalytic activity;metal ion binding	Pf00124						0	0	3.79858e+07	4.14574e+07	3.38773e+07	3.77863e+07	4.16851e+07	4.69202e+07	High	High	High	High	High	High	1
High	Master Protein	C3S7F3	Oleosin OS=Brassica napus OX=3708 GN=S4 PE=2 SV=1	0	70.756	29	6	48	2	212	22.2	9.55	193	59.09	6	6		membrane		Pf01277	106352688		LOC106352688	A2		0	1	7.7818e+06	7.79204e+06	9.76979e+06	1.3394e+07	1.21124e+07	1.25128e+07	High	High	High	High	High	High	1
High	Master Protein	A0A078FA24	BnaC08g45440D protein OS=Brassica napus OX=3708 GN=BnaC08g45440D PE=4 SV=1	0	70.738	12	12	42	2	1018	111.3	5.19	151	53.57	12	12		membrane	catalytic activity;metal ion binding;nucleotide binding	Pf00122, Pf00689, Pf00690, Pf00702, Pf08282, Pf12710, Pf13246		GSBRNA2T00031669001				0	10	1.56005e+07	1.6327e+07	1.29628e+07	1.39026e+07	1.62449e+07	1.8504e+07	High	High	High	High	High	High	1
High	Master Protein	A0A078HQ83	Alpha-galactosidase OS=Brassica napus OX=3708 GN=BnaAnng06130D PE=3 SV=1	0	70.642	20	6	45	5	414	46.4	7.94	177	45.47	6	6	metabolic process		catalytic activity	Pf02065, Pf10566		GSBRNA2T00071647001				0	2	1.70681e+07	1.79284e+07	1.41573e+07	1.61755e+07	1.91006e+07	1.95953e+07	High	High	High	High	High	High	1
High	Master Protein	A0A078IKN9	BnaCnng17800D protein OS=Brassica napus OX=3708 GN=BnaCnng17800D PE=3 SV=1	0	70.15	29	5	29	5	238	26.1	4.5	158	56.48	5	5	metabolic process		RNA binding	Pf00736		GSBRNA2T00093490001				0	0	5.61782e+06	6.17592e+06	4.98733e+06	5.33378e+06	6257327	6.60934e+06	High	High	High	High	High	High	1
High	Master Protein	A0A078GXH9	26S proteasome non-ATPase regulatory subunit 2 homolog OS=Brassica napus OX=3708 GN=BnaA03g49280D PE=3 SV=1	0	70.069	15	14	53	4	891	97.8	5.16	164	62.94	14	14	regulation of biological process	proteasome	enzyme regulator activity	Pf01851		GSBRNA2T00044368001				0	11	3.561e+07	3.58561e+07	3.10923e+07	3.23909e+07	3.72587e+07	4.10518e+07	High	High	High	High	High	High	1
High	Master Protein	A0A078GHJ2	BnaA08g14640D protein OS=Brassica napus OX=3708 GN=BnaA08g14640D PE=4 SV=1	0	70.046	21	4	37	4	295	32.4	4.73	174	67.83	4	4			RNA binding	Pf00076, Pf13893, Pf14259	106361316	GSBRNA2T00027327001	LOC106361316	A8		0	0	8.89646e+06	1.04691e+07	8.25368e+06	7.83815e+06	9.32954e+06	9.95125e+06	High	High	High	High	High	High	1
High	Master Protein	A0A078HFV5	BnaA07g04260D protein OS=Brassica napus OX=3708 GN=BnaA07g04260D PE=3 SV=1	0	70.028	30	6	21	6	319	35.4	4.77	108	34.01	6	6	metabolic process		catalytic activity;DNA binding;protein binding	Pf01000, Pf01193	106371538; 106445647	GSBRNA2T00062367001	LOC106371538; LOC106445647	A10; A4	Purine metabolism; RNA polymerase; Pyrimidine metabolism; Metabolic pathways	4	0	4.04183e+06	4.09331e+06	3.29848e+06	3.58849e+06	4.09112e+06	4.49109e+06	High	High	High	High	High	High	1
High	Master Protein	A0A078IM60	Oleosin OS=Brassica napus OX=3708 GN=BnaC04g32530D PE=3 SV=1	0	69.888	42	7	68	4	229	24.6	9.35	253	82.35	7	7		membrane		Pf01277		GSBRNA2T00095929001				0	1	6.26678e+07	6.58807e+07	7.25308e+07	9.25866e+07	9.27014e+07	9.49447e+07	High	High	High	High	High	High	1
High	Master Protein	A0A078JFT9	Glutathione transferase OS=Brassica napus OX=3708 GN=BnaCnng47740D PE=3 SV=1	0	69.831	25	4	39	4	213	24.3	6.02	217	68.28	4	4			protein binding	Pf00043, Pf02798, Pf13409, Pf13410, Pf13417	106401984; 106426568; 106426574	GSBRNA2T00046820001	LOC106401984; LOC106426568; LOC106426574	A5; C2	Glutathione metabolism	1	0	3.5686e+07	4.12713e+07	3.14536e+07	2.52033e+07	2.82741e+07	3.21819e+07	High	High	High	High	High	High	1
High	Master Protein	A0A078ISM9	Importin subunit alpha OS=Brassica napus OX=3708 GN=BnaC08g48070D PE=3 SV=1	0	69.802	13	6	31	1	534	58.8	5.14	167	52.44	5	6	transport	cytoplasm;nucleus	protein binding;transporter activity	Pf00514, Pf01749, Pf02985, Pf13513, Pf13646	106350364; 106415559	GSBRNA2T00004751001	LOC106350364; LOC106415559	C5; C8		0	0	1.86249e+06	1.88726e+06	1.62287e+06	1.88294e+06	1.99927e+06	2.01144e+06	High	High	High	High	High	High	1
High	Master Protein	A0A078H0Z9	Phosphoglycerate mutase (2,3-diphosphoglycerate-independent) OS=Brassica napus OX=3708 GN=BnaA08g26140D PE=3 SV=1	0	69.735	16	8	36	1	557	60.5	5.68	136	38.93	8	6	metabolic process	cytoplasm	catalytic activity;metal ion binding	Pf01676, Pf06415	106362381	GSBRNA2T00047139001	LOC106362381	A8	Carbon metabolism; Metabolic pathways; Glycolysis / Gluconeogenesis; Biosynthesis of amino acids; Biosynthesis of secondary metabolites; Glycine, serine and threonine metabolism	6	0	929411	766250	819430	858178	956139	860496	High	High	High	High	High	High	1
High	Master Protein	A0A078HYB5	BnaAnng07020D protein OS=Brassica napus OX=3708 GN=BnaAnng07020D PE=4 SV=1	0	69.71	9	12	47	5	1355	148.7	8.59	184	48.36	12	10		membrane		Pf00565, Pf00567		GSBRNA2T00075577001				0	0	560598	565430	458818	500171	574686	564092	High	High	High	High	High	High	1
High	Master Protein	A0A411FV72	Fructose-bisphosphate aldolase OS=Brassica napus OX=3708 PE=2 SV=1	0	69.511	35	10	55	7	358	38.5	7.3	202	47.19	10	8										0	0	4.50967e+07	4.26751e+07	3.5773e+07	4.02925e+07	4.30881e+07	4.72021e+07	High	High	High	High	High	High	1
High	Master Protein	A0A078FF90	BnaA05g11730D protein OS=Brassica napus OX=3708 GN=BnaA05g11730D PE=3 SV=1	0	69.362	16	9	61	2	712	76.5	6.05	264	74.25	9	8	metabolic process;response to stimulus	membrane	catalytic activity;metal ion binding;nucleotide binding	Pf00004, Pf01057, Pf01078, Pf01434, Pf05496, Pf06068, Pf06480, Pf07724, Pf07726, Pf07728, Pf13191, Pf13195, Pf13207, Pf13401		GSBRNA2T00048583001				0	7	1.37743e+07	1.50837e+07	1.23175e+07	1.26033e+07	1.49718e+07	1.47475e+07	High	High	High	High	High	High	1
High	Master Protein	A0A078JWZ2	BnaA06g38470D protein OS=Brassica napus OX=3708 GN=BnaA06g38470D PE=4 SV=1	0	69.321	57	7	39	7	167	17.9	4.37	174	40.25	7	5			metal ion binding	Pf00036, Pf13202, Pf13405, Pf13499, Pf13833		GSBRNA2T00096568001				0	0	9.64974e+06	1.00204e+07	7.89307e+06	7.84638e+06	8.96937e+06	9.82429e+06	High	High	High	High	High	High	1
High	Master Protein	A0A078GJ20	BnaC09g41780D protein OS=Brassica napus OX=3708 GN=BnaC09g41780D PE=3 SV=1	0	68.99	19	8	37	8	536	59.1	6.25	156	40.62	8	8	metabolic process	cytoplasm	nucleotide binding;protein binding	Pf00118		GSBRNA2T00035303001				0	0	3.28065e+07	3.59588e+07	2.96083e+07	3.08172e+07	3.56591e+07	3.47563e+07	High	High	High	High	High	High	1
High	Master Protein	A0A078GNF2	Peptidyl-prolyl cis-trans isomerase OS=Brassica napus OX=3708 GN=BnaC09g09060D PE=3 SV=1	0	68.809	38	4	34	4	171	18.4	8.15	190	41.2	4	3	metabolic process		catalytic activity	Pf00160	106347045	GSBRNA2T00035712001	LOC106347045	C2		0	0	7.29114e+06	7.61811e+06	5.46299e+06	7.18603e+06	8.68317e+06	8.98242e+06	High	High	High	High	High	High	1
High	Master Protein	A0A078GUB1	Transaldolase OS=Brassica napus OX=3708 GN=BnaC05g09650D PE=3 SV=1	0	68.732	16	6	44	6	471	50.8	8.79	171	56.24	6	6	metabolic process	cytoplasm	catalytic activity	Pf00923		GSBRNA2T00044601001				0	0	2.39223e+07	2.45186e+07	2.05637e+07	2.38688e+07	2.54519e+07	2.78428e+07	High	High	High	High	High	High	1
High	Master Protein	A0A078ILX3	BnaCnng21660D protein OS=Brassica napus OX=3708 GN=BnaCnng21660D PE=4 SV=1	0	68.417	28	4	18	3	272	29.7	6.89	103	37.97	4	4	metabolic process		catalytic activity	Pf01738, Pf02230, Pf05448, Pf12695, Pf12697	106427696	GSBRNA2T00004761001	LOC106427696	C4	Metabolic pathways; Biosynthesis of secondary metabolites	2	1	8.3725e+06	8.95186e+06	7.01059e+06	7.17571e+06	8.95077e+06	8.89624e+06	High	High	High	High	High	High	1
High	Master Protein	A0A078FDP6	BnaC05g04410D protein OS=Brassica napus OX=3708 GN=BnaC05g04410D PE=3 SV=1	0	68.176	16	9	61	4	692	73.8	6.43	255	71.9	9	7	metabolic process;response to stimulus	membrane	catalytic activity;metal ion binding;nucleotide binding	Pf00004, Pf01057, Pf01078, Pf01434, Pf01695, Pf05496, Pf06068, Pf06480, Pf07724, Pf07726, Pf07728, Pf13191, Pf13207, Pf13401	106400603	GSBRNA2T00032017001	LOC106400603	C5		0	0	7.96757e+06	8.94783e+06	6.25914e+06	7.22396e+06	8.17761e+06	8.77125e+06	High	High	High	High	High	High	1
High	Master Protein	A0A078HMH2	6-phosphogluconate dehydrogenase, decarboxylating OS=Brassica napus OX=3708 GN=BnaA04g11280D PE=3 SV=1	0	68.125	21	8	35	1	487	53.3	5.67	157	44.82	8	8	metabolic process		catalytic activity	Pf00393, Pf03446	106446309	GSBRNA2T00068501001	LOC106446309	A4		0	7	1.24821e+07	1.24608e+07	1.05144e+07	1.04825e+07	1.28857e+07	1.30641e+07	High	High	High	High	High	High	1
High	Master Protein	A0A078JVB3	Glutathione transferase OS=Brassica napus OX=3708 GN=BnaAnng37730D PE=3 SV=1	0	68.09	19	4	36	4	264	29.5	8.07	179	64.43	4	4			protein binding	Pf00043, Pf02798, Pf13409, Pf13410, Pf13417	106438339	GSBRNA2T00016745001	LOC106410572; LOC106438339	A3	Glutathione metabolism	1	0	1.02645e+07	1.08777e+07	8.98209e+06	9.12762e+06	1.09033e+07	1.09512e+07	High	High	High	High	High	High	1
High	Master Protein	A0A078GLG4	Malate dehydrogenase OS=Brassica napus OX=3708 GN=BnaC06g06220D PE=3 SV=1	0	68.012	18	6	74	1	343	35.9	8.1	311	94.24	6	5	metabolic process		catalytic activity	Pf00056, Pf01073, Pf02866		GSBRNA2T00033534001				0	0	7.23971e+06	7.65522e+06	5.62187e+06	6.07469e+06	7.47976e+06	7.48213e+06	High	High	High	High	High	High	1
High	Master Protein	Q39311	Aspartic protease OS=Brassica napus OX=3708 GN=BnaC08g41720D PE=3 SV=1	0	67.908	18	7	51	2	506	54.3	5.27	225	66	7	6	metabolic process		catalytic activity	Pf00026, Pf03489, Pf05184, Pf14543	106415098	GSBRNA2T00057065001	LOC106415098	C8		0	3	7.08285e+06	7.51069e+06	6.36267e+06	6.4251e+06	6.85746e+06	7.37636e+06	High	High	High	High	High	High	1
High	Master Protein	A0A078GJJ3	BnaA08g15420D protein OS=Brassica napus OX=3708 GN=BnaA08g15420D PE=3 SV=1	0	67.883	12	7	27	2	685	76.6	5.49	117	38.41	7	7	metabolic process		catalytic activity;metal ion binding	Pf00557, Pf01321		GSBRNA2T00027213001				0	0	553516	509911	464626	454612	548228	577210	High	High	High	High	High	High	1
High	Master Protein	A0A078GZI5	BnaA04g16090D protein OS=Brassica napus OX=3708 GN=BnaA04g16090D PE=4 SV=1	0	67.869	21	7	63	1	389	43.7	6.32	257	80.74	7	6	metabolic process		catalytic activity	Pf01370, Pf03435, Pf07993	106422390; 106446737	GSBRNA2T00045244001	LOC106422390; LOC106446737	A8; A4	Metabolic pathways; Amino sugar and nucleotide sugar metabolism	2	0							Not Found	Not Found	Not Found	Not Found	Not Found	Not Found	1
High	Master Protein	A0A078IZ74	Ubiquitinyl hydrolase 1 OS=Brassica napus OX=3708 GN=BnaA03g55410D PE=3 SV=1	0	67.865	10	14	46	1	1115	130.8	5.85	148	58.35	14	13	metabolic process		catalytic activity;protein binding	Pf00443, Pf00917, Pf12436, Pf13423, Pf14533		GSBRNA2T00017326001				0	0	1.0786e+06	1.07356e+06	834766	941009	1.09972e+06	1.16675e+06	High	High	High	High	High	High	1
High	Master Protein	A0A078FUU2	BnaC05g02380D protein OS=Brassica napus OX=3708 GN=BnaC05g02380D PE=3 SV=1	0	67.827	18	3	55	3	164	18.5	10.35	284	86	3	3	metabolic process	ribosome	RNA binding;structural molecule activity	Pf00203		GSBRNA2T00002744001				0	0	2.52802e+07	2.65227e+07	2.144e+07	2.61854e+07	3.17403e+07	3.35868e+07	High	High	High	High	High	High	1
High	Master Protein	A0A078H663	ATP:AMP phosphotransferase OS=Brassica napus OX=3708 GN=BnaC03g27800D PE=3 SV=1	0	67.285	37	9	58	8	245	27	7.8	193	66.09	9	9	metabolic process		catalytic activity;nucleotide binding	Pf00406, Pf05191, Pf13207	106388472	GSBRNA2T00055904001	LOC106388472	C3	Biosynthesis of secondary metabolites; Metabolic pathways; Purine metabolism; Thiamine metabolism	4	1	2.06473e+07	2.2169e+07	1.75413e+07	1.94651e+07	2.28106e+07	2.35821e+07	High	High	High	High	High	High	1
High	Master Protein	A0A078IJL7	BnaA03g47570D protein OS=Brassica napus OX=3708 GN=BnaA03g47570D PE=3 SV=1	0	67.216	28	8	26	4	313	33.1	10.08	113	36.45	8	8	metabolic process		catalytic activity;RNA binding	Pf01269, Pf13847	106444625	GSBRNA2T00096124001	LOC106444625	A3	Ribosome biogenesis in eukaryotes	1	0	6.18677e+06	6.59065e+06	4.63955e+06	5.14829e+06	6.38012e+06	6.75281e+06	High	High	High	High	High	High	1
High	Master Protein	A0A078IJ10	BnaC09g52200D protein OS=Brassica napus OX=3708 GN=BnaC09g52200D PE=4 SV=1	0	67.168	30	6	49	6	151	17.3	5.99	204	55.59	6	6	defense response;response to stimulus			Pf00407	106449265	GSBRNA2T00094122001	LOC106449265			0	0	2.48337e+07	2.56016e+07	2.04178e+07	2.17224e+07	2.56931e+07	2.6831e+07	High	High	High	High	High	High	1
High	Master Protein	A0A078IT30	40S ribosomal protein S7 OS=Brassica napus OX=3708 GN=BnaC01g41990D PE=3 SV=1	0	67.163	38	6	68	5	191	22.1	9.83	240	82.7	6	5	metabolic process	ribosome	structural molecule activity	Pf01251	106366814; 106387287	GSBRNA2T00013786001	LOC106366814; LOC106387287	A1	Ribosome	1	2	1.37081e+07	1.4717e+07	1.19324e+07	1.32485e+07	1.56038e+07	1.61956e+07	High	High	High	High	High	High	1
High	Master Protein	A0A078G6S3	Phosphoglycerate mutase (2,3-diphosphoglycerate-independent) OS=Brassica napus OX=3708 GN=BnaC08g13860D PE=3 SV=1	0	67.148	16	8	34	1	557	60.6	5.68	127	38.93	8	6	metabolic process	cytoplasm	catalytic activity;metal ion binding	Pf01676, Pf06415	106453134	GSBRNA2T00012859001	LOC106453134	C8	Biosynthesis of secondary metabolites; Biosynthesis of amino acids; Glycine, serine and threonine metabolism; Carbon metabolism; Metabolic pathways; Glycolysis / Gluconeogenesis	6	5	8.47707e+06	8.89106e+06	7.15457e+06	7.72453e+06	9.33938e+06	9.5739e+06	High	High	High	High	High	High	1
High	Master Protein	A0A078ILR5	BnaCnng19790D protein OS=Brassica napus OX=3708 GN=BnaCnng19790D PE=4 SV=1	0	67.035	27	8	58	3	413	46.4	5.71	210	76.39	8	8	metabolic process		protein binding;RNA binding	Pf00043, Pf00647, Pf02798, Pf13409, Pf13410, Pf13417, Pf14497	106401045	GSBRNA2T00097720001	LOC106401045	C5		0	0	6.89333e+06	6.07776e+06	5.41506e+06	5.42351e+06	6.53427e+06	6.30278e+06	High	High	High	High	High	High	1
High	Master Protein	A0A078I4P0	BnaCnng11970D protein OS=Brassica napus OX=3708 GN=BnaCnng11970D PE=4 SV=1	0	67.035	9	12	23	11	1730	191.7	5.71	111	28.87	12	9	regulation of biological process			Pf01369, Pf09324, Pf12783		GSBRNA2T00080876001				0	1	7.39775e+06	7.38925e+06	6.48673e+06	7.33855e+06	8.42555e+06	8.92874e+06	High	High	High	High	High	High	1
High	Master Protein	A0A078FLR3	OMPdecase OS=Brassica napus OX=3708 GN=BnaC04g26270D PE=3 SV=1	0	66.998	14	5	22	1	478	52.2	6.93	121	38.71	5	4	metabolic process		catalytic activity	Pf00156, Pf00215	106431382	GSBRNA2T00071100001	LOC106431382		Metabolic pathways; Pyrimidine metabolism	2	0	1.63175e+06	1.69514e+06	1.47111e+06	1.25298e+06	1.53406e+06	1.6803e+06	High	High	High	High	High	High	1
High	Master Protein	A0A078G355	BnaA09g04240D protein OS=Brassica napus OX=3708 GN=BnaA09g04240D PE=3 SV=1	0	66.988	11	10	28	6	1179	128.7	5.82	110	32.45	10	9	metabolic process		catalytic activity;nucleotide binding	Pf00686, Pf01326		GSBRNA2T00009518001				0	4	1.26426e+07	1.29853e+07	1.07658e+07	1.1882e+07	1.41692e+07	1.45305e+07	High	High	High	High	High	High	1
High	Master Protein	A0A078F1X0	BnaA05g26910D protein OS=Brassica napus OX=3708 GN=BnaA05g26910D PE=3 SV=1	0	66.985	31	8	73	1	377	41.6	5.48	313	99.06	8	8			nucleotide binding	Pf00022		GSBRNA2T00000222001				0	1							High	High	High	High	High	High	1
High	Master Protein	A0A078G2F1	BnaC05g13930D protein OS=Brassica napus OX=3708 GN=BnaC05g13930D PE=3 SV=1	0	66.667	18	12	37	3	543	60	5.4	124	39.02	12	11			catalytic activity;nucleotide binding	Pf00009, Pf03143, Pf03144		GSBRNA2T00006488001				0	9	1.24125e+07	1.2744e+07	1.1097e+07	1.05177e+07	1.19408e+07	1.27536e+07	High	High	High	High	High	High	1
High	Master Protein	A0A078HEE7	40S ribosomal protein S8 OS=Brassica napus OX=3708 GN=BnaC09g37460D PE=3 SV=1	0	66.438	31	6	67	2	258	29.3	10.36	313	63.63	6	6	metabolic process	ribosome	structural molecule activity	Pf01201		GSBRNA2T00059318001				0	0	3.21298e+06	3.07144e+06	2.91604e+06	3.52092e+06	4.12563e+06	4.11771e+06	High	High	High	High	High	High	1
High	Master Protein	A0A078IU35	ATP citrate synthase OS=Brassica napus OX=3708 GN=BnaA09g53260D PE=3 SV=1	0	66.297	23	8	51	7	423	46.7	5.43	176	63.12	8	8			catalytic activity;nucleotide binding	Pf08442		GSBRNA2T00014635001				0	1	3.95822e+07	3.99974e+07	3.56339e+07	4.14296e+07	4.54863e+07	5.08631e+07	High	High	High	High	High	High	1
High	Master Protein	A0A078FJ41	BnaC03g60490D protein OS=Brassica napus OX=3708 GN=BnaC03g60490D PE=4 SV=1	0	66.242	50	7	50	5	158	15.8	5.34	215	40.03	7	5			RNA binding	Pf00076, Pf13893, Pf14259		GSBRNA2T00061124001				0	0	1.55964e+07	1.62902e+07	1.35349e+07	1.42811e+07	1.67855e+07	1.72686e+07	High	High	High	High	High	High	1
High	Master Protein	A0A078JGH8	BnaAnng21080D protein OS=Brassica napus OX=3708 GN=BnaAnng21080D PE=3 SV=1	0	66.228	11	7	26	2	754	84.7	5.83	111	35.1	7	7	metabolic process		catalytic activity;metal ion binding	Pf00557, Pf01321		GSBRNA2T00048196001				0	5	1.70236e+07	1.86179e+07	1.43236e+07	1.55705e+07	1.78402e+07	1.914e+07	High	High	High	High	High	High	1
High	Master Protein	A0A078JG43	40S ribosomal protein S6 OS=Brassica napus OX=3708 GN=BnaA08g30710D PE=3 SV=1	0	66.034	19	6	56	2	250	28.4	10.61	242	74.18	6	6	metabolic process	ribosome	structural molecule activity	Pf01092	106424201; 106439129	GSBRNA2T00047943001	LOC106424201; LOC106439129	A8; C3	Ribosome	1	4	4.39752e+07	4.24631e+07	3.9586e+07	3.9591e+07	5.61033e+07	5.94744e+07	High	High	High	High	High	High	1
High	Master Protein	C3S7F0	Oleosin S1-2 OS=Brassica napus OX=3708 GN=S1 PE=1 SV=1	0	66.014	21	6	102	5	193	20.7	8.5	350	124.04	6	6		membrane		Pf01277, Pf05957	106388671		LOC106388671	C3		0	0	1.21883e+08	1.32375e+08	1.40881e+08	1.61552e+08	1.61277e+08	1.71284e+08	High	High	High	High	High	High	1
High	Master Protein	A0A078ILF2	Aspartokinase OS=Brassica napus OX=3708 GN=BnaC01g41040D PE=3 SV=1	0	65.97	11	9	28	8	922	100.3	7.31	107	34.34	9	9	metabolic process		catalytic activity;nucleotide binding	Pf00696, Pf00742, Pf01842, Pf03447, Pf13840	106365919	GSBRNA2T00004498001	LOC106365919	C1	Biosynthesis of secondary metabolites; Glycine, serine and threonine metabolism; Cysteine and methionine metabolism; Lysine biosynthesis; Biosynthesis of amino acids; Metabolic pathways; Monobactam biosynthesis	7	1	1.12896e+07	1.17045e+07	1.06163e+07	1.04913e+07	1.15136e+07	1.31876e+07	High	High	High	High	High	High	1
High	Master Protein	A0A078GUB6	Aspartate--tRNA ligase OS=Brassica napus OX=3708 GN=BnaA01g06010D PE=3 SV=1	0	65.914	17	8	23	6	549	61.6	6.62	117	36.43	8	8	metabolic process	cytoplasm	catalytic activity;nucleotide binding;RNA binding	Pf00152, Pf01336, Pf01409	106354716; 106383936	GSBRNA2T00039983001	LOC106354716; LOC106383936	A7; A1	Aminoacyl-tRNA biosynthesis	1	2	1.06975e+07	1.08915e+07	9.64182e+06	1.0726e+07	1.23846e+07	1.37758e+07	High	High	High	High	High	High	1
High	Master Protein	A0A078HW44	BnaA02g27980D protein OS=Brassica napus OX=3708 GN=BnaA02g27980D PE=4 SV=1	0	65.87	12	2	51	2	280	29.5	5.3	307	83.58	2	2	metabolic process		catalytic activity	Pf00890, Pf01266, Pf01946, Pf13450		GSBRNA2T00072297001				0	0	2.02621e+07	2.28298e+07	1.73065e+07	1.80647e+07	2.04033e+07	2.13755e+07	High	High	High	High	High	High	1
High	Master Protein	A0A078HW05	Pyruvate kinase OS=Brassica napus OX=3708 GN=BnaA06g22820D PE=3 SV=1	0	65.854	20	9	42	4	493	53.3	7.81	162	46.11	9	8	metabolic process		catalytic activity;metal ion binding	Pf00224, Pf02887		GSBRNA2T00073155001; GSBRNA2T00141638001				0	8	2.09565e+07	2.07041e+07	1.79792e+07	1.94907e+07	2.20146e+07	2.47228e+07	High	High	High	High	High	High	1
High	Master Protein	A0A078GBI0	Beta-amylase OS=Brassica napus OX=3708 GN=BnaA08g05660D PE=3 SV=1	0	65.844	27	9	31	5	498	56.2	5.35	162	52.86	9	7	metabolic process		catalytic activity	Pf01373	106360628	GSBRNA2T00021040001	LOC106360628	A8		0	4	1.69935e+07	1.74983e+07	1.39086e+07	1.23449e+07	1.51852e+07	1.5567e+07	High	High	High	High	High	High	1
High	Master Protein	A0A078H631	Calcium-transporting ATPase OS=Brassica napus OX=3708 GN=BnaC02g11860D PE=3 SV=1	0	65.755	10	10	30	1	1122	121.5	7.88	121	37.14	10	10	transport	membrane	catalytic activity;metal ion binding;nucleotide binding;protein binding;transporter activity	Pf00122, Pf00689, Pf00690, Pf00702, Pf08282, Pf12515, Pf12710, Pf13246, Pf14806		GSBRNA2T00053058001				0	10	1.10251e+07	11774786	1.03605e+07	9.63864e+06	1.13161e+07	1.23164e+07	High	High	High	High	High	High	1
High	Master Protein	A0A078HXD6	BnaA08g00080D protein OS=Brassica napus OX=3708 GN=BnaA08g00080D PE=3 SV=1	0	65.675	20	10	29	4	519	58.1	8.7	128	34.43	10	9				Pf01798, Pf08060, Pf08156	106354114	GSBRNA2T00074700001	LOC106354114	A8	Ribosome biogenesis in eukaryotes	1	7	1.86738e+07	1.96769e+07	1.58116e+07	1.70976e+07	2.24349e+07	2.34109e+07	High	High	High	High	High	High	1
High	Master Protein	A0A078I1T6	3'(2'),5'-bisphosphate nucleotidase OS=Brassica napus OX=3708 GN=BnaA06g23120D PE=3 SV=1	0	65.617	25	7	23	4	355	37.8	5.12	98	35.97	7	7	metabolic process		catalytic activity	Pf00459		GSBRNA2T00077276001				0	3	7.20126e+06	7.42756e+06	6.54456e+06	6.96311e+06	7.88681e+06	8.45303e+06	High	High	High	High	High	High	1
High	Master Protein	A0A078F7W2	BnaC02g19980D protein OS=Brassica napus OX=3708 GN=BnaC02g19980D PE=3 SV=1	0	65.586	19	7	30	7	381	43.3	6.06	125	31.35	7	7	metabolic process		catalytic activity	Pf00155, Pf04864		GSBRNA2T00030967001				0	0	1.22028e+07	1.25491e+07	9.24558e+06	1.03921e+07	1.1104e+07	1.25712e+07	High	High	High	High	High	High	1
High	Master Protein	A0A078ITD6	BnaC04g54290D protein OS=Brassica napus OX=3708 GN=BnaC04g54290D PE=3 SV=1	0	65.563	14	8	57	1	730	78	6.51	248	68.19	8	7	metabolic process;response to stimulus	membrane	catalytic activity;metal ion binding;nucleotide binding	Pf00004, Pf01057, Pf01078, Pf01434, Pf05496, Pf06068, Pf06480, Pf07724, Pf07726, Pf07728, Pf13191, Pf13195, Pf13207, Pf13401		GSBRNA2T00007599001				0	0	539246	611911	465011	481886	532765	508233	High	High	High	High	High	High	1
High	Master Protein	A0A078FP81	Coatomer subunit delta OS=Brassica napus OX=3708 GN=BnaC02g02500D PE=3 SV=1	0	65.529	17	8	30	8	570	62.7	6.57	128	42.51	8	8	transport	membrane		Pf00928		GSBRNA2T00078679001				0	0	1.545e+07	1.59046e+07	1.38371e+07	1.41989e+07	1.71411e+07	1.75615e+07	High	High	High	High	High	High	1
High	Master Protein	A0A078GCA4	S-(hydroxymethyl)glutathione dehydrogenase OS=Brassica napus OX=3708 GN=BnaA06g36450D PE=3 SV=1	0	65.516	19	5	41	5	379	40.7	6.95	179	50.43	5	5	metabolic process;transport		catalytic activity;metal ion binding	Pf00107, Pf02254, Pf08240, Pf13578	106410687	GSBRNA2T00018796001	LOC106410687	A9	Carbon metabolism; Tyrosine metabolism; Metabolic pathways; Fatty acid degradation; Biosynthesis of secondary metabolites; Glycolysis / Gluconeogenesis	6	0	2.78748e+07	2.87082e+07	2.49748e+07	2.53061e+07	2.9399e+07	3.31706e+07	High	High	High	High	High	High	1
High	Master Protein	A0A078JGT8	Phosphoglucomutase (alpha-D-glucose-1,6-bisphosphate-dependent) OS=Brassica napus OX=3708 GN=BnaCnng44490D PE=3 SV=1	0	65.387	16	9	28	9	629	68.5	5.73	105	40.89	9	9	metabolic process		catalytic activity;metal ion binding	Pf00408, Pf02878, Pf02879, Pf02880		GSBRNA2T00042494001				0	0	6.68384e+06	6.69836e+06	5.41934e+06	5.67027e+06	7.04354e+06	7.42815e+06	High	High	High	High	High	High	1
High	Master Protein	A0A078IPX9	Polyadenylate-binding protein OS=Brassica napus OX=3708 GN=BnaA08g11610D PE=3 SV=1	0	65.38	19	9	33	7	619	67.6	8.34	155	32.51	9	7		cytoplasm	catalytic activity;RNA binding	Pf00076, Pf00658, Pf08777, Pf12169, Pf13893, Pf14259		GSBRNA2T00004546001				0	1	1.62944e+07	1.64809e+07	1.34423e+07	1.48391e+07	1.70568e+07	1.8562e+07	High	High	High	High	High	High	1
High	Master Protein	A0A078IXL6	BnaC08g47290D protein OS=Brassica napus OX=3708 GN=BnaC08g47290D PE=3 SV=1	0	65.319	14	8	23	4	669	75	7.77	106	35.57	8	8	metabolic process	membrane	catalytic activity;metal ion binding;RNA binding	Pf01269, Pf03483		GSBRNA2T00013339001				0	4	9.99086e+06	1.03949e+07	8.15069e+06	8.61156e+06	9.39996e+06	1.10292e+07	High	High	High	High	High	High	1
High	Master Protein	A0A078GGM6	Inositol-3-phosphate synthase OS=Brassica napus OX=3708 GN=BnaA04g12720D PE=3 SV=1	0	65.307	17	7	32	5	510	56.2	5.55	146	44.06	7	6	metabolic process		catalytic activity	Pf01658, Pf07994		GSBRNA2T00032843001				0	3	8.9066e+06	9.94126e+06	8.19091e+06	8.73601e+06	9.76137e+06	1.04397e+07	High	High	High	High	High	High	1
High	Master Protein	A0A078GHE3	E1 ubiquitin-activating enzyme OS=Brassica napus OX=3708 GN=BnaC03g16630D PE=3 SV=1	0	65.281	9	8	30	1	1018	113.2	5.27	126	46.15	7	8	metabolic process		catalytic activity;nucleotide binding	Pf00899, Pf02134, Pf09358, Pf10585		GSBRNA2T00024554001				0	0	45961.9	63475.6	56460.6	46920.7	58845.6	58448.7	High	High	High	High	High	High	1
High	Master Protein	A0A078FFT7	Eukaryotic translation initiation factor 3 subunit A OS=Brassica napus OX=3708 GN=BnaC09g23910D PE=3 SV=1	0	65.138	10	13	37	6	967	112.3	9.11	109	42.61	13	13	cell organization and biogenesis;metabolic process;regulation of biological process	cytoplasm	protein binding;RNA binding	Pf01399	106446290	GSBRNA2T00071212001	LOC106446290	C9	RNA transport	1	7	1.30034e+07	1.40503e+07	1.16989e+07	1.24723e+07	1.41965e+07	1.57609e+07	High	High	High	High	High	High	1
High	Master Protein	A0A078ICD3	Endoglucanase OS=Brassica napus OX=3708 GN=BnaAnng09040D PE=3 SV=1	0	65.079	16	6	20	2	499	54.9	6.99	107	37.73	6	6	metabolic process	membrane	catalytic activity	Pf00759		GSBRNA2T00087564001				0	4	4.06475e+06	4.43417e+06	4.06457e+06	3.83989e+06	4.09481e+06	4.26815e+06	High	High	High	High	High	High	1
High	Master Protein	A0A078I1J8	Beta-ketoacyl-[acyl-carrier-protein] synthase I OS=Brassica napus OX=3708 GN=BnaA02g24400D PE=3 SV=1	0	64.827	18	6	29	1	472	50.1	7.9	139	36.45	6	5	metabolic process		catalytic activity	Pf00109, Pf02801	106411349	GSBRNA2T00079347001	LOC106411349	A2	Metabolic pathways; Fatty acid metabolism; Fatty acid biosynthesis; Biotin metabolism	4	0	3.70503e+06	3.64671e+06	3.64369e+06	5.4541e+06	7.14815e+06	7.20405e+06	High	High	High	High	High	High	1
High	Master Protein	A0A078IFI4	BnaC06g01990D protein OS=Brassica napus OX=3708 GN=BnaC06g01990D PE=3 SV=1	0	64.742	22	7	26	6	402	44	7.85	120	42.96	6	7			catalytic activity	Pf00291	106406306	GSBRNA2T00093548001	LOC106406306	C8		0	0	6.60312e+06	7.07943e+06	6.09648e+06	5.90258e+06	6.94185e+06	7.53106e+06	High	High	High	High	High	High	1
High	Master Protein	A0A078G1M1	BnaC05g14020D protein OS=Brassica napus OX=3708 GN=BnaC05g14020D PE=3 SV=1	0	64.704	11	12	27	12	1382	147.9	6.09	110	30.48	12	10	metabolic process		catalytic activity;metal ion binding;nucleotide binding	Pf01116, Pf03446, Pf07005, Pf14833		GSBRNA2T00006497001				0	0	1.17762e+07	1.2463e+07	1.01761e+07	9.41971e+06	11283003	1.22374e+07	High	High	High	High	High	High	1
High	Master Protein	Q93X64	Enoyl-[acyl-carrier protein] reductase OS=Brassica napus OX=3708 GN=enrB1 PE=2 SV=1	0	64.703	14	5	66	2	387	40.7	8.35	327	102.89	5	5	metabolic process		catalytic activity	Pf13561	106439777		LOC106439777	A3	Biotin metabolism; Fatty acid biosynthesis; Metabolic pathways; Fatty acid metabolism	4	3	2.01653e+07	2.13886e+07	1.74107e+07	1.79744e+07	2.11259e+07	2.12847e+07	High	High	High	High	High	High	1
High	Master Protein	A0A078H104	BnaA08g26240D protein OS=Brassica napus OX=3708 GN=BnaA08g26240D PE=4 SV=1	0	64.665	23	8	40	2	412	46.5	5.69	130	46.75	8	8	metabolic process		protein binding;RNA binding	Pf00043, Pf00647, Pf02798, Pf13409, Pf13410, Pf13417, Pf14497	106362367	GSBRNA2T00047149001	LOC106362367	A8		0	0	3.37367e+06	3.977e+06	3.25525e+06	2.80806e+06	3.246e+06	3.94504e+06	High	High	High	High	High	High	1
High	Master Protein	P27818	Acetolactate synthase 1, chloroplastic OS=Brassica napus OX=3708 PE=3 SV=1	0	64.662	15	8	32	8	655	71.2	6.61	131	48.9	8	8	metabolic process;response to stimulus		catalytic activity;metal ion binding;nucleotide binding	Pf00205, Pf02775, Pf02776	106366633; 106353715; 106353716; 106366634		LOC106366633; LOC106353715; LOC106353716; LOC106366634	C7	Valine, leucine and isoleucine biosynthesis; Metabolic pathways; Biosynthesis of secondary metabolites; Pantothenate and CoA biosynthesis; C5-Branched dibasic acid metabolism; Butanoate metabolism; Biosynthesis of amino acids; 2-Oxocarboxylic acid metabolism	8	0	8.03879e+06	8.6687e+06	7.25032e+06	7.57626e+06	8.58275e+06	9.31717e+06	High	High	High	High	High	High	1
High	Master Protein	A0A078FRJ6	Malate dehydrogenase OS=Brassica napus OX=3708 GN=BnaA08g27880D PE=3 SV=1	0	64.433	25	11	79	2	332	35.8	6.55	253	66.46	10	10	metabolic process		catalytic activity	Pf00056, Pf02866		GSBRNA2T00089674001				0	2	1.88182e+07	1.95302e+07	1.48786e+07	1.59637e+07	1.71056e+07	1.87923e+07	High	High	High	High	High	High	1
High	Master Protein	A0A078GD37	Coatomer subunit beta OS=Brassica napus OX=3708 GN=BnaA08g12450D PE=4 SV=1	0	64.426	15	11	32	2	948	105.9	5.9	128	35.01	11	9	transport	cytoplasm;Golgi;membrane	structural molecule activity	Pf01602, Pf07718, Pf13646, Pf14806		GSBRNA2T00021874001				0	0	1.45453e+06	1.57104e+06	1.34398e+06	1.44105e+06	1.68827e+06	1.7712e+06	High	High	High	High	High	High	1
High	Master Protein	A0A078H0L9	Pectinesterase OS=Brassica napus OX=3708 GN=BnaA04g24790D PE=3 SV=1	0	64.29	22	8	56	1	516	56.2	8.46	349	64.63	8	6	cell organization and biogenesis;metabolic process;regulation of biological process		catalytic activity;enzyme regulator activity	Pf01095, Pf04043		GSBRNA2T00045069001				0	7	3.30681e+07	3.55683e+07	2.98619e+07	2.79844e+07	2.98483e+07	3.23197e+07	High	High	High	High	High	High	1
High	Master Protein	A0A078IWY9	BnaC07g50300D protein OS=Brassica napus OX=3708 GN=BnaC07g50300D PE=4 SV=1	0	64.225	18	9	32	1	465	53.1	9.35	115	38.95	9	8	regulation of biological process	endoplasmic reticulum;membrane		Pf13166		GSBRNA2T00019426001				0	0	317601	374174	315293	345998	449809	485774	High	High	High	High	High	High	1
High	Master Protein	A0A078GP93	BnaA05g18500D protein OS=Brassica napus OX=3708 GN=BnaA05g18500D PE=3 SV=1	0	64.018	22	4	51	4	209	24.2	10.27	225	60.65	4	3	metabolic process	ribosome	RNA binding;structural molecule activity	Pf00416		GSBRNA2T00040217001				0	0	2.72302e+07	2.82239e+07	2.30241e+07	2.62214e+07	3.13105e+07	3.19947e+07	High	High	High	High	High	High	1
High	Master Protein	A0A078J373	BnaA06g40280D protein OS=Brassica napus OX=3708 GN=BnaA06g40280D PE=3 SV=1	0	64.014	13	18	44	7	1067	121.1	6.28	92	41.13	16	18			catalytic activity;motor activity;nucleotide binding	Pf00261, Pf01576, Pf02263, Pf02841, Pf07888, Pf09726, Pf11932, Pf12128		GSBRNA2T00023047001				0	12	1.9872e+07	2.1276e+07	1.64667e+07	1.70294e+07	2.00554e+07	2.1041e+07	High	High	High	High	High	High	1
High	Master Protein	A0A078G5F1	BnaC08g13770D protein OS=Brassica napus OX=3708 GN=BnaC08g13770D PE=4 SV=1	0	63.967	18	8	42	2	558	63	6.81	133	49	8	8	metabolic process	membrane	protein binding;RNA binding	Pf00043, Pf00647, Pf02798, Pf13409, Pf13410, Pf13417, Pf14497		GSBRNA2T00012869001				0	2	7.74083e+06	8.02127e+06	6.61599e+06	6.74585e+06	7.88269e+06	8.61438e+06	High	High	High	High	High	High	1
High	Master Protein	A0A078G305	BnaA09g03590D protein OS=Brassica napus OX=3708 GN=BnaA09g03590D PE=3 SV=1	0	63.965	11	4	20	4	535	58.9	9.01	124	39.66	4	4				Pf01798, Pf08060, Pf08156		GSBRNA2T00009438001				0	0	4.80843e+06	4.79529e+06	4.04981e+06	4.46141e+06	5.0691e+06	5.47577e+06	High	High	High	High	High	High	1
High	Master Protein	A0A078FS01	BnaA04g12000D protein OS=Brassica napus OX=3708 GN=BnaA04g12000D PE=3 SV=1	0	63.875	21	5	50	5	312	33.1	7.31	257	79.12	5	4	metabolic process		catalytic activity	Pf00121		GSBRNA2T00090276001				0	0	3.9236e+07	4.13582e+07	3.26439e+07	3.74369e+07	4.50843e+07	4.78023e+07	High	High	High	High	High	High	1
High	Master Protein	A0A078G9Q8	BnaA09g01080D protein OS=Brassica napus OX=3708 GN=BnaA09g01080D PE=3 SV=1	0	63.749	44	4	45	1	150	15.8	9.52	222	62.02	4	4	metabolic process			Pf02531		GSBRNA2T00018465001				0	0	649264	811460	500786	571407	659636	828747	High	High	High	High	High	High	1
High	Master Protein	A0A078H547	BnaA09g45410D protein OS=Brassica napus OX=3708 GN=BnaA09g45410D PE=3 SV=1	0	63.69	10	12	28	12	1458	159.2	5.5	116	34.45	11	11	transport		protein binding;structural molecule activity	Pf03177, Pf08801		GSBRNA2T00055146001				0	0	6.60244e+06	6.71606e+06	5.97452e+06	6.19185e+06	6.99916e+06	7.80434e+06	High	High	High	High	High	High	1
High	Master Protein	A0A078F164	BnaA05g13990D protein OS=Brassica napus OX=3708 GN=BnaA05g13990D PE=3 SV=1	0	63.647	19	7	69	5	412	46.7	5.68	251	70.22	7	6			catalytic activity;nucleotide binding	Pf00270, Pf00271	106346743	GSBRNA2T00125537001	LOC106346743	A8	RNA transport	1	2	3.9475e+07	3.97164e+07	3.29537e+07	3.53872e+07	4.17671e+07	4.62633e+07	High	High	High	High	High	High	1
High	Master Protein	A0A078GBV3	BnaC03g23220D protein OS=Brassica napus OX=3708 GN=BnaC03g23220D PE=3 SV=1	0	63.61	7	10	30	10	1589	173.2	6.95	116	34.94	10	10	metabolic process		catalytic activity	Pf00310, Pf01493, Pf01645, Pf04898		GSBRNA2T00019085001				0	0	6.3463e+06	6.0833e+06	5.42762e+06	5.68823e+06	6.71868e+06	6.92343e+06	High	High	High	High	High	High	1
High	Master Protein	A0A078JR60	Sulfate adenylyltransferase OS=Brassica napus OX=3708 GN=BnaCnng62800D PE=4 SV=1	0	63.537	24	10	38	3	462	51.2	6.81	145	43.96	10	8	metabolic process		catalytic activity	Pf01747, Pf14306		GSBRNA2T00086154001				0	8	1.40753e+07	1.45468e+07	1.21457e+07	1.3776e+07	1.60996e+07	1.70256e+07	High	High	High	High	High	High	1
High	Master Protein	A0A078FA16	BnaC05g04590D protein OS=Brassica napus OX=3708 GN=BnaC05g04590D PE=4 SV=1	0	63.495	30	6	34	1	263	28.2	7.33	144	36.05	6	4	metabolic process		metal ion binding	Pf01789	106400646	GSBRNA2T00032038001	LOC106400646	C5	Photosynthesis; Metabolic pathways	2	6	5.66774e+07	5.61638e+07	5.62552e+07	5.61411e+07	6.17566e+07	6.13211e+07	High	High	High	High	High	High	1
High	Master Protein	A0A078I644	BnaC01g30200D protein OS=Brassica napus OX=3708 GN=BnaC01g30200D PE=3 SV=1	0	63.444	15	8	36	1	605	64.6	6.8	127	44.71	8	8	metabolic process		catalytic activity;metal ion binding	Pf00920, Pf04023	106451505	GSBRNA2T00083772001	LOC106451505	C1	Valine, leucine and isoleucine biosynthesis; Biosynthesis of secondary metabolites; Metabolic pathways; Pantothenate and CoA biosynthesis; Biosynthesis of amino acids; 2-Oxocarboxylic acid metabolism	6	1	1.48987e+06	1.58792e+06	1.38187e+06	1.30534e+06	1.58988e+06	1.5654e+06	High	High	High	High	High	High	1
High	Master Protein	A0A078FDX8	BnaA03g00380D protein OS=Brassica napus OX=3708 GN=BnaA03g00380D PE=3 SV=1	0	63.443	23	6	24	6	309	33.2	5.95	108	29.22	6	5	metabolic process		catalytic activity	Pf01680, Pf05690		GSBRNA2T00049220001				0	0	2.15618e+07	2.43073e+07	1.76827e+07	1.76655e+07	2.06188e+07	2.48305e+07	High	High	High	High	High	High	1
High	Master Protein	O22502	Calreticulin OS=Brassica napus OX=3708 GN=Crt1 PE=2 SV=1	0	63.337	17	7	42	2	422	47.5	4.69	173	58.39	7	7	metabolic process	endoplasmic reticulum	metal ion binding;protein binding	Pf00262	106415836		LOC106415836	C5	Protein processing in endoplasmic reticulum; Phagosome	2	0	2.47598e+06	2.55916e+06	2.01361e+06	2.13236e+06	2.46375e+06	2.6467e+06	High	High	High	High	High	High	1
High	Master Protein	A0A078IT49	BnaA06g01660D protein OS=Brassica napus OX=3708 GN=BnaA06g01660D PE=4 SV=1	0	62.988	17	6	19	1	529	59	5.24	87	27.03	5	5	cellular homeostasis;regulation of biological process			Pf00085, Pf13098, Pf13848	106345739	GSBRNA2T00008259001	LOC106345739	A6	Protein processing in endoplasmic reticulum	1	0	226154	234185	191183	65582	66912.2	80830.9	High	High	High	High	High	High	1
High	Master Protein	A0A078J1N2	Malate dehydrogenase OS=Brassica napus OX=3708 GN=BnaCnng29330D PE=3 SV=1	0	62.901	26	7	64	2	341	35.7	8.27	243	79.67	7	5	metabolic process		catalytic activity	Pf00056, Pf01073, Pf02866		GSBRNA2T00017390001				0	4	2.50513e+07	2.70433e+07	2.10483e+07	2.11447e+07	2.61008e+07	2.71044e+07	High	High	High	High	High	High	1
High	Master Protein	A0A078J714	N-acyl-L-amino-acid amidohydrolase OS=Brassica napus OX=3708 GN=BnaCnng34250D PE=3 SV=1	0	62.88	22	7	18	1	447	49.6	6.54	111	27.31	7	6	metabolic process	cytoplasm	catalytic activity	Pf01546, Pf07687	106433265	GSBRNA2T00025556001	LOC106433265	C1		0	0	596525	694660	584852	753711	449467	738748	High	High	High	High	High	High	1
High	Master Protein	A0A078J3A4	40S ribosomal protein S8 (Fragment) OS=Brassica napus OX=3708 GN=BnaCnng36150D PE=3 SV=1	0	62.861	36	7	67	2	228	25.4	10.32	305	63.2	7	7	metabolic process	ribosome	structural molecule activity	Pf01201		GSBRNA2T00028539001				0	0	898219	799172	707506	735386	879284	930198	High	High	High	High	High	High	1
High	Master Protein	G4XUQ5	Phospholipase D (Fragment) OS=Brassica napus OX=3708 PE=2 SV=1	0	62.831	18	8	22	1	529	60.8	7.05	97	31.67	8	8			catalytic activity	Pf00614, Pf12357, Pf13091	111207705		LOC111207705	C7		0	1	704409	743054	689654	761741	782031	890071	High	High	High	High	High	High	1
High	Master Protein	A0A078IZA0	BnaCnng27520D protein OS=Brassica napus OX=3708 GN=BnaCnng27520D PE=3 SV=1	0	62.741	22	5	92	1	249	27.4	9.5	394	138.33	5	5	metabolic process	ribosome	RNA binding;structural molecule activity	Pf00189, Pf07650	106396573	GSBRNA2T00014595001	LOC106396573	C7	Ribosome	1	0	7.02841e+06	6.87318e+06	6.54954e+06	6.93219e+06	7.42518e+06	8.13337e+06	High	High	High	High	High	High	1
High	Master Protein	A0A078FZY3	Pyruvate decarboxylase OS=Brassica napus OX=3708 GN=BnaC09g31460D PE=3 SV=1	0	62.733	14	7	34	1	607	65.5	6.09	141	31.4	7	7			catalytic activity;metal ion binding	Pf00205, Pf02775, Pf02776	106411347	GSBRNA2T00009656001	LOC106411347	C7	Metabolic pathways; Biosynthesis of secondary metabolites; Glycolysis / Gluconeogenesis	3	0	2.11427e+06	2.26129e+06	2.06748e+06	1.64949e+06	1.93179e+06	1.98391e+06	High	High	High	High	High	High	1
High	Master Protein	A0A078HF78	BnaC03g61870D protein OS=Brassica napus OX=3708 GN=BnaC03g61870D PE=4 SV=1	0	62.707	12	6	64	2	577	64.7	5.45	361	79.78	4	6				Pf00190		GSBRNA2T00058495001				0	0	4.19601e+07	4.64718e+07	3.6466e+07	4.80377e+07	5.11434e+07	5.84323e+07	High	High	High	High	High	High	1
High	Master Protein	A0A078FY76	BnaA01g23200D protein OS=Brassica napus OX=3708 GN=BnaA01g23200D PE=3 SV=1	0	62.607	15	8	36	1	609	65	7.37	128	45.67	8	8	metabolic process		catalytic activity;metal ion binding	Pf00920, Pf04023		GSBRNA2T00002531001				0	0							High	High	High	High	High	High	1
High	Master Protein	A0A078G5D3	Dihydrolipoyllysine-residue succinyltransferase OS=Brassica napus OX=3708 GN=BnaC09g31840D PE=3 SV=1	0	62.466	19	8	37	1	464	50.2	9.04	156	43.1	8	8	metabolic process		catalytic activity	Pf00198, Pf00364, Pf01597, Pf13533	106353595; 106411033	GSBRNA2T00009710001	LOC106353595; LOC106411033	C9	Lysine degradation; Citrate cycle (TCA cycle); Carbon metabolism; Biosynthesis of secondary metabolites; Metabolic pathways	5	8	1.44814e+07	1.64869e+07	1.26817e+07	1.23443e+07	1.50461e+07	1.55746e+07	High	High	High	High	High	High	1
High	Master Protein	A0A078HT41	Proteasome subunit beta OS=Brassica napus OX=3708 GN=BnaA09g15380D PE=3 SV=1	0	62.458	37	6	28	1	245	27.5	6.7	117	36.79	6	6	metabolic process	cytoplasm;nucleus;proteasome	catalytic activity	Pf00227	106386515; 106386526	GSBRNA2T00073421001	LOC106386515; LOC106386526		Proteasome	1	7	1.30497e+07	1.41911e+07	1.08e+07	1.14192e+07	1.34755e+07	1.32409e+07	High	High	High	High	High	High	1
High	Master Protein	A0A078IQA0	H(+)-exporting diphosphatase OS=Brassica napus OX=3708 GN=BnaA09g56670D PE=3 SV=1	0	62.419	11	8	37	2	802	83.9	5.2	151	44.71	8	7	transport	membrane	catalytic activity;transporter activity	Pf03030		GSBRNA2T00010424001				0	0	299964	319352	304620	300792	339579	367335	High	High	High	High	High	High	1
High	Master Protein	A0A078GSU8	BnaA01g06220D protein OS=Brassica napus OX=3708 GN=BnaA01g06220D PE=3 SV=1	0	62.398	14	7	51	5	583	61.2	7.2	230	65	7	7	metabolic process	cytoplasm	catalytic activity;metal ion binding	Pf00883, Pf02789		GSBRNA2T00039956001				0	0	1.89844e+07	2.12317e+07	1.84348e+07	1.93497e+07	2.32125e+07	2.57414e+07	High	High	High	High	High	High	1
High	Master Protein	A0A078IY55	Protein disulfide-isomerase OS=Brassica napus OX=3708 GN=BnaA09g55010D PE=3 SV=1	0	62.334	17	8	33	8	579	64.2	4.83	156	43.76	8	6	cellular homeostasis;regulation of biological process	endoplasmic reticulum	catalytic activity	Pf00085, Pf13098, Pf13848, Pf13899		GSBRNA2T00020356001				0	0	1.00527e+07	1.08607e+07	7.8823e+06	8.28537e+06	1.03197e+07	1.07877e+07	High	High	High	High	High	High	1
High	Master Protein	A0A078I8W0	BnaC09g21470D protein OS=Brassica napus OX=3708 GN=BnaC09g21470D PE=3 SV=1	0	62.183	13	8	34	2	611	65.3	6.89	122	46.65	8	8	metabolic process		catalytic activity;metal ion binding	Pf00920, Pf04023	106452467	GSBRNA2T00082278001	LOC106452467	C7	Metabolic pathways; Biosynthesis of secondary metabolites; Pantothenate and CoA biosynthesis; Biosynthesis of amino acids; 2-Oxocarboxylic acid metabolism; Valine, leucine and isoleucine biosynthesis	6	6	1.59281e+07	1.58766e+07	1.35991e+07	1.33736e+07	1.52447e+07	1.66414e+07	High	High	High	High	High	High	1
High	Master Protein	A0A078HWL0	Delta(24)-sterol reductase OS=Brassica napus OX=3708 GN=BnaA01g25880D PE=4 SV=1	0	62.128	20	11	86	5	561	65.2	8.03	276	82.88	10	9	metabolic process	membrane	catalytic activity;nucleotide binding	Pf01565		GSBRNA2T00074419001				0	7	4.1004e+07	4.00547e+07	3.61297e+07	4.10089e+07	4.4606e+07	5.22712e+07	High	High	High	High	High	High	1
High	Master Protein	A0A078HX11	BnaA09g15970D protein OS=Brassica napus OX=3708 GN=BnaA09g15970D PE=3 SV=1	0	62.111	19	11	56	5	594	67.3	4.74	186	74.59	10	11	metabolic process	endoplasmic reticulum	metal ion binding;protein binding	Pf00262		GSBRNA2T00074633001				0	6	6.51094e+07	8.18119e+07	6.13157e+07	6.47063e+07	7.16941e+07	8.20348e+07	High	High	High	High	High	High	1
High	Master Protein	A0A078JI13	BnaAnng22050D protein OS=Brassica napus OX=3708 GN=BnaAnng22050D PE=4 SV=1	0	62.052	22	11	31	6	481	53.5	6.7	110	36.68	11	11	metabolic process		catalytic activity	Pf00155		GSBRNA2T00053330001				0	5	3.82965e+06	3.68999e+06	3.2519e+06	3.15785e+06	3.68154e+06	3.92167e+06	High	High	High	High	High	High	1
High	Master Protein	A0A078H392	BnaA02g34280D protein OS=Brassica napus OX=3708 GN=BnaA02g34280D PE=3 SV=1	0	62.039	14	8	46	3	778	83.5	7.55	223	59.2	8	6	metabolic process		catalytic activity	Pf00933, Pf01915, Pf14310		GSBRNA2T00047484001				0	0	3.16025e+06	3.20173e+06	2.63212e+06	2.53737e+06	2.8401e+06	3.05728e+06	High	High	High	High	High	High	1
High	Master Protein	A0A078JNV3	Serine hydroxymethyltransferase OS=Brassica napus OX=3708 GN=BnaCnng62500D PE=3 SV=1	0	62.037	18	7	47	2	471	51.7	7.47	220	62.39	7	5	metabolic process		catalytic activity	Pf00155, Pf00464		GSBRNA2T00084232001				0	5	3.15123e+07	3.16242e+07	2.36958e+07	2.80572e+07	3.42485e+07	3.38265e+07	High	High	High	High	High	High	1
High	Master Protein	Q949M3	3-oxoacyl-[acyl-carrier-protein] reductase 3, chloroplastic OS=Brassica napus OX=3708 GN=bkr3 PE=2 SV=1	0	61.983	29	8	45	4	315	33.1	9.44	169	57.85	8	7	metabolic process		catalytic activity;nucleotide binding	Pf00106, Pf08659, Pf13561	106401718	GSBRNA2T00142300001	LOC106401718	C5	Fatty acid biosynthesis; Biosynthesis of unsaturated fatty acids; Metabolic pathways; Biotin metabolism; Fatty acid metabolism	5	4	4.36722e+07	4.52819e+07	3.68547e+07	4.08315e+07	5.03772e+07	5.3545e+07	High	High	High	High	High	High	1
High	Master Protein	B8X355	LEA protein group 3 OS=Brassica napus OX=3708 GN=ECP63 PE=2 SV=1	0	61.948	19	10	28	7	398	43.5	5.82	105	32.75	9	10				Pf02987						0	4	8.37425e+06	8.85113e+06	8.37457e+06	9.49597e+06	1.03423e+07	1.10057e+07	High	High	High	High	High	High	1
High	Master Protein	A0A078HZ32	BnaC09g33780D protein OS=Brassica napus OX=3708 GN=BnaC09g33780D PE=3 SV=1	0	61.759	29	8	32	1	404	45.5	5.5	114	40.09	8	8	metabolic process;regulation of biological process;response to stimulus	cytoplasm	catalytic activity;nucleotide binding;RNA binding	Pf00004, Pf00006, Pf00910, Pf01057, Pf01078, Pf05496, Pf05673, Pf06068, Pf07724, Pf07726, Pf07728, Pf13191, Pf13401, Pf13521, Pf13604		GSBRNA2T00077412001				0	7	6.19346e+06	6.3947e+06	4.95496e+06	5.48839e+06	6.34291e+06	6.56993e+06	High	High	High	High	High	High	1
High	Master Protein	Q7XYW4	Seed specific protein Bn15D12A (Fragment) OS=Brassica napus OX=3708 PE=2 SV=1	0	61.717	48	6	67	2	157	17	8.12	299	83.82	6	5	regulation of biological process		enzyme regulator activity	Pf04043						0	4	1.92861e+08	2.22569e+08	2.09604e+08	2.15288e+08	2.53009e+08	2.74622e+08	High	High	High	High	High	High	1
High	Master Protein	A0A078HY73	Tubulin alpha chain OS=Brassica napus OX=3708 GN=BnaC02g09000D PE=3 SV=1	0	61.62	23	8	75	1	450	49.6	5.1	299	94.81	8	6	cell organization and biogenesis		catalytic activity;nucleotide binding;structural molecule activity	Pf00091, Pf03953	106380737; 106380740	GSBRNA2T00074535001; GSBRNA2T00074534001	LOC106380737; LOC106380740	C2	Phagosome	1	2	2.31274e+06	2404869	1.98508e+06	2.25973e+06	2.58797e+06	2.72817e+06	High	High	High	High	High	High	1
High	Master Protein	A0A078FU45	Fructose-bisphosphate aldolase OS=Brassica napus OX=3708 GN=BnaA04g12130D PE=3 SV=1	0	61.615	24	8	47	4	390	42.2	7.36	191	34.39	8	6	metabolic process		catalytic activity			GSBRNA2T00090258001				0	0	3.19071e+06	3.06796e+06	2.67582e+06	2.44554e+06	3.25204e+06	3.42483e+06	High	High	High	High	High	High	1
High	Master Protein	A0A078FK46	BnaC06g14130D protein OS=Brassica napus OX=3708 GN=BnaC06g14130D PE=3 SV=1	0	61.587	15	10	37	5	625	69.5	6.6	124	39.13	10	9		membrane	metal ion binding			GSBRNA2T00071350001				0	0	9.11725e+06	9.181e+06	8.33425e+06	9.44986e+06	9.74805e+06	1.20814e+07	High	High	High	High	High	High	1
High	Master Protein	A0A078GH13	BnaC03g17580D protein OS=Brassica napus OX=3708 GN=BnaC03g17580D PE=3 SV=1	0	61.559	22	5	100	1	249	27.3	9.5	405	143.02	5	5	metabolic process	ribosome	RNA binding;structural molecule activity	Pf00189, Pf07650		GSBRNA2T00024435001				0	5	1.05805e+08	1.04396e+08	9.54792e+07	9.94234e+07	1.19216e+08	1.2227e+08	High	High	High	High	High	High	1
High	Master Protein	A0A078HDS6	BnaA05g29880D protein OS=Brassica napus OX=3708 GN=BnaA05g29880D PE=3 SV=1	0	61.478	12	9	40	1	803	91.3	5.63	143	44.77	9	8	metabolic process;response to stimulus		nucleotide binding;protein binding	Pf00183, Pf02518, Pf13589		GSBRNA2T00059518001				0	0	2.16507e+06	2.03609e+06	2.00623e+06	2.08698e+06	2.19624e+06	2.46575e+06	High	High	High	High	High	High	1
High	Master Protein	A0A078IB26	3-isopropylmalate dehydratase OS=Brassica napus OX=3708 GN=BnaCnng15040D PE=4 SV=1	0	61.308	15	6	40	1	509	54.9	7.37	200	31.14	6	5	metabolic process		catalytic activity	Pf00330		GSBRNA2T00087256001				0	0	1.67753e+06	1.54914e+06	1.45044e+06	1450205	1644545	1.82367e+06	High	High	High	High	High	High	1
High	Master Protein	A0A078EBD9	BnaC05g09500D protein OS=Brassica napus OX=3708 GN=BnaC05g09500D PE=4 SV=1	0	61.302	45	7	31	3	148	16.5	4.94	122	29.87	7	5			metal ion binding	Pf00036, Pf13405, Pf13499, Pf13833	106376231; 106445592	GSBRNA2T00105453001; GSBRNA2T00044621001	LOC106376231; LOC106445592	A6; C5	Plant-pathogen interaction	1	5	1.19382e+07	1.23603e+07	1.00764e+07	1.08326e+07	1.29489e+07	1.41456e+07	High	High	High	High	High	High	1
High	Master Protein	A0A078FRZ0	Dihydrolipoyllysine-residue succinyltransferase OS=Brassica napus OX=3708 GN=BnaA10g09340D PE=3 SV=1	0	61.089	20	8	36	1	466	50.2	9.09	152	41.03	8	7	metabolic process		catalytic activity	Pf00198, Pf00364, Pf01597, Pf13533	106371324	GSBRNA2T00095389001	LOC106371324	A10	Metabolic pathways; Carbon metabolism; Biosynthesis of secondary metabolites; Citrate cycle (TCA cycle); Lysine degradation	5	0							High	High	High	High	High	High	1
High	Master Protein	A0A078GHE0	BnaA08g15140D protein OS=Brassica napus OX=3708 GN=BnaA08g15140D PE=3 SV=1	0	61.04	29	7	52	3	258	28	10.73	242	82.61	7	6	metabolic process	ribosome	RNA binding;structural molecule activity	Pf00181, Pf03947		GSBRNA2T00027251001				0	4	3.80041e+07	3.38445e+07	3.11058e+07	3.10755e+07	3.68473e+07	4.22528e+07	High	High	High	High	High	High	1
High	Master Protein	A0A078J5S9	BnaCnng35410D protein OS=Brassica napus OX=3708 GN=BnaCnng35410D PE=3 SV=1	0	60.875	25	6	21	4	276	29.3	8.7	101	29.47	6	5	transport	membrane	transporter activity	Pf01459	106386009; 106386011	GSBRNA2T00027539001	LOC106386009; LOC106386011			0	2	1.88619e+07	2.07218e+07	1.64853e+07	1.65576e+07	2.01803e+07	2.14129e+07	High	High	High	High	High	High	1
High	Master Protein	A0A078G7T4	Calcium-transporting ATPase OS=Brassica napus OX=3708 GN=BnaA02g08330D PE=3 SV=1	0	60.802	10	10	30	1	1070	115.7	7.61	112	35.39	10	10	transport	membrane	catalytic activity;metal ion binding;nucleotide binding;protein binding;transporter activity	Pf00122, Pf00689, Pf00690, Pf00702, Pf08282, Pf12515, Pf12710, Pf13246		GSBRNA2T00012883001				0	0	1.05891e+06	1.03247e+06	938270	859898	906620	1.10118e+06	High	High	High	High	High	High	1
High	Master Protein	A0A078FNT2	BnaC09g38180D protein OS=Brassica napus OX=3708 GN=BnaC09g38180D PE=3 SV=1	0	60.764	28	5	34	1	221	24	4.63	164	45.48	5	4	metabolic process		RNA binding	Pf00043, Pf00736		GSBRNA2T00078527001				0	0	8.68694e+06	8.05455e+06	8.59485e+06	6.90502e+06	8.40977e+06	8.45706e+06	High	High	High	High	High	High	1
High	Master Protein	A0A078HBT3	BnaA01g24650D protein OS=Brassica napus OX=3708 GN=BnaA01g24650D PE=4 SV=1	0	60.709	16	9	31	6	591	66.1	5.44	102	43.39	9	9	cellular component movement			Pf08317, Pf13851		GSBRNA2T00056265001				0	3	1.4359e+07	1.53501e+07	1.18542e+07	1.25887e+07	1.52475e+07	1.5407e+07	High	High	High	High	High	High	1
High	Master Protein	A0A078FUD5	BnaA02g05320D protein OS=Brassica napus OX=3708 GN=BnaC09g36740D PE=4 SV=1	0	60.555	44	8	46	1	149	16.8	4.27	241	67.13	7	7			metal ion binding	Pf00036, Pf08726, Pf13202, Pf13405, Pf13499, Pf13833, Pf14658	106365551; 106371686; 106384908; 106386973; 106421303; 106421304; 106435081	GSBRNA2T00147242001; GSBRNA2T00148898001; GSBRNA2T00001324001; GSBRNA2T00140886001; GSBRNA2T00094407001	LOC106365551; LOC106371686; LOC106384908; LOC106386973; LOC106421303; LOC106421304; LOC106435081	A9; A10; A2; C3; A3	MAPK signaling pathway - plant; Plant-pathogen interaction; Phosphatidylinositol signaling system	3	0	8.21604e+06	6.54742e+06	4.68233e+06	4.27583e+06	4.54624e+06	4.4748e+06	High	High	High	High	High	High	1
High	Master Protein	A0A078IPM5	BnaC01g41280D protein OS=Brassica napus OX=3708 GN=BnaC01g41280D PE=4 SV=1	0	60.529	7	11	23	10	1737	202	7.99	76	29.33	9	11	metabolic process	spliceosomal complex	protein binding;RNA binding	Pf01398, Pf08082, Pf08083, Pf08084, Pf10596, Pf10597, Pf12134		GSBRNA2T00004464001				0	1	5.70755e+06	5.57906e+06	4.91691e+06	5.09807e+06	6.24169e+06	6.51774e+06	High	High	High	High	High	High	1
High	Master Protein	A0A078ILZ0	BnaC03g45040D protein OS=Brassica napus OX=3708 GN=BnaC03g45040D PE=3 SV=1	0	60.338	14	5	54	2	382	40.3	8.46	263	80.44	5	5				Pf13561		GSBRNA2T00096653001				0	0	942994	1.12338e+06	839266	930907	1.0581e+06	1.02204e+06	High	High	High	High	High	High	1
High	Master Protein	A0A078I0K7	BnaC02g32980D protein OS=Brassica napus OX=3708 GN=BnaC02g32980D PE=4 SV=1	0	60.292	53	4	44	2	154	17	4.97	235	67.86	4	3	regulation of biological process		enzyme regulator activity	Pf04043		GSBRNA2T00076973001				0	0	1.21222e+07	1.39766e+07	1.24465e+07	1.35182e+07	1.98805e+07	1.78177e+07	High	High	High	High	High	High	1
High	Master Protein	A0A078GRJ1	BnaC09g28660D protein OS=Brassica napus OX=3708 GN=BnaC09g28660D PE=3 SV=1	0	60.061	14	9	79	3	705	81	5.05	291	92.13	8	8	metabolic process;response to stimulus		nucleotide binding;protein binding	Pf00183, Pf02518, Pf13589	106421473	GSBRNA2T00038672001	LOC106421473	C7	Protein processing in endoplasmic reticulum; Plant-pathogen interaction	2	0	2.46787e+07	2.92618e+07	2.10985e+07	2.20985e+07	2.26503e+07	2.83368e+07	High	High	High	High	High	High	1
High	Master Protein	A0A078IJ35	Polyadenylate-binding protein OS=Brassica napus OX=3708 GN=BnaA06g03080D PE=3 SV=1	0	60.038	18	10	25	9	653	70.8	7.81	107	29.62	10	6		cytoplasm	RNA binding	Pf00076, Pf00658, Pf13893, Pf14259		GSBRNA2T00098085001				0	1	9.13829e+06	8.84253e+06	7.54203e+06	7.19866e+06	8.68379e+06	9.04041e+06	High	High	High	High	High	High	1
High	Master Protein	A0A078G944	BnaC09g00220D protein OS=Brassica napus OX=3708 GN=BnaC09g00220D PE=3 SV=1	0	60.009	25	5	53	2	281	30.7	9.09	241	62.01	5	5	metabolic process			Pf02531		GSBRNA2T00018242001				0	6	7.43312e+07	8.02311e+07	6.57834e+07	6.47021e+07	7.51389e+07	8.20256e+07	High	High	High	High	High	High	1
High	Master Protein	A0A078J609	BnaC03g12460D protein OS=Brassica napus OX=3708 GN=BnaC03g12460D PE=3 SV=1	0	60.005	29	8	32	1	404	45.4	5.5	113	46.3	8	8	metabolic process;regulation of biological process;response to stimulus	cytoplasm	catalytic activity;nucleotide binding;RNA binding	Pf00004, Pf00006, Pf00910, Pf01057, Pf01078, Pf05496, Pf05673, Pf06068, Pf07724, Pf07726, Pf07728, Pf13191, Pf13401, Pf13521, Pf13604		GSBRNA2T00024849001				0	0	345209	370042	322561	348248	372848	407103	High	High	High	High	High	High	1
High	Master Protein	A0A078FIA9	Malate synthase OS=Brassica napus OX=3708 GN=BnaC02g02870D PE=3 SV=1	0	59.985	15	8	19	1	561	63.7	7.93	98	25.04	8	7	metabolic process		catalytic activity	Pf01274		GSBRNA2T00078724001				0	7	3.07923e+06	3.20248e+06	3.09272e+06	3.93352e+06	4.12544e+06	4.35959e+06	High	High	High	High	High	High	1
High	Master Protein	A0A078HKL0	BnaA07g02120D protein OS=Brassica napus OX=3708 GN=BnaA07g02120D PE=3 SV=1	0	59.912	32	7	53	3	235	25.4	10.64	248	77.92	7	7	metabolic process	ribosome	structural molecule activity	Pf00181, Pf03947		GSBRNA2T00065476001				0	0	6.08909e+06	5.92061e+06	5.61706e+06	5.67512e+06	6.1457e+06	6.50253e+06	High	High	High	High	High	High	1
High	Master Protein	A0A078J863	BnaC09g50980D protein OS=Brassica napus OX=3708 GN=BnaC09g50980D PE=3 SV=1	0	59.851	11	14	32	9	1217	139.6	5.4	102	35.63	14	13	metabolic process;transport		transporter activity	Pf01496, Pf04111, Pf12128		GSBRNA2T00030356001				0	5	6.41247e+06	6.87268e+06	5.43045e+06	5.69679e+06	6.58716e+06	6.70568e+06	High	High	High	High	High	High	1
High	Master Protein	A0A078G446	BnaA09g04300D protein OS=Brassica napus OX=3708 GN=BnaA09g04300D PE=4 SV=1	0	59.839	18	6	72	5	344	39.4	8.51	250	81.53	6	5			protein binding	Pf00917		GSBRNA2T00009525001				0	1	1.36691e+08	1.50077e+08	1.47074e+08	1.5712e+08	1.62369e+08	1.5507e+08	High	High	High	High	High	High	1
High	Master Protein	A0A078I9X3	BnaA07g10500D protein OS=Brassica napus OX=3708 GN=BnaA07g10500D PE=3 SV=1	0	59.826	49	9	25	7	260	29.1	4.79	117	27.14	9	7			protein binding	Pf00244	106358175	GSBRNA2T00085933001	LOC106358175	A7		0	1	2.74869e+06	2.91751e+06	2.19509e+06	2.48188e+06	2.75017e+06	2.96925e+06	High	High	High	High	High	High	1
High	Master Protein	A0A078GEC9	BnaC03g40860D protein OS=Brassica napus OX=3708 GN=BnaC03g40860D PE=3 SV=1	0	59.825	13	12	34	3	1074	119.9	5.49	128	43.07	12	10	metabolic process		catalytic activity;metal ion binding	Pf00675, Pf05193, Pf08367		GSBRNA2T00021401001				0	9	1.17592e+07	1.16317e+07	9.63592e+06	9.93537e+06	1.1458e+07	1.22089e+07	High	High	High	High	High	High	1
High	Master Protein	A0A078FMX6	Eukaryotic translation initiation factor 3 subunit I OS=Brassica napus OX=3708 GN=BnaA06g32100D PE=3 SV=1	0	59.758	30	8	33	2	344	38.1	6.71	135	26.15	8	5	cell organization and biogenesis;metabolic process;regulation of biological process	cytoplasm	protein binding;RNA binding	Pf00400		GSBRNA2T00078138001				0	7	1.25246e+07	1.3226e+07	1.06144e+07	1.10448e+07	1.3341e+07	1.35106e+07	High	High	High	High	High	High	1
High	Master Protein	A0A078FR19	BnaC09g40570D protein OS=Brassica napus OX=3708 GN=BnaC09g40570D PE=3 SV=1	0	59.742	13	6	37	2	570	60.9	6.16	181	61.86	6	5	metabolic process		catalytic activity;metal ion binding	Pf00205, Pf02552, Pf02775, Pf02776	106445973	GSBRNA2T00094846001	LOC106445973	C9	Peroxisome	1	0	5.72525e+06	5.88272e+06	4.49865e+06	5.85193e+06	6.86965e+06	6.5077e+06	High	High	High	High	High	High	1
High	Master Protein	A0A078IA69	BnaC01g22560D protein OS=Brassica napus OX=3708 GN=BnaC01g22560D PE=4 SV=1	0	59.669	20	5	35	4	404	45.8	6.64	142	47.5	5	5				Pf03080, Pf14365	106370758	GSBRNA2T00088221001	LOC106370758; BNAC01G22560D	C1		0	1	7.69345e+06	8.90175e+06	6.28785e+06	6.90356e+06	7.90236e+06	8.76427e+06	High	High	High	High	High	High	1
High	Master Protein	Q96538	Acyl-CoA synthetase OS=Brassica napus OX=3708 PE=2 SV=1	0	59.592	15	8	32	8	667	74.4	6.33	125	32.38	8	7	metabolic process		catalytic activity	Pf00501	106441492	GSBRNA2T00116198001	LOC106441492	C1	Fatty acid biosynthesis; Peroxisome; Metabolic pathways; Fatty acid metabolism; Fatty acid degradation	5	0	5.06206e+06	5.5347e+06	4.95198e+06	4.97467e+06	5.54788e+06	6.4706e+06	High	High	High	High	High	High	1
High	Master Protein	A0A078H970	Citrulline--aspartate ligase OS=Brassica napus OX=3708 GN=BnaA01g14190D PE=3 SV=1	0	59.573	29	12	45	1	499	54.3	6.71	128	53.03	12	11	metabolic process		catalytic activity;nucleotide binding	Pf00764		GSBRNA2T00056355001				0	0	3.66023e+06	3.48421e+06	3.01781e+06	3.13274e+06	3.54985e+06	3.85342e+06	High	High	High	High	High	High	1
High	Master Protein	A0A078J7G7	BnaCnng36560D protein OS=Brassica napus OX=3708 GN=BnaCnng36560D PE=4 SV=1	0	59.538	31	12	51	3	311	35.2	7.97	169	52.87	11	12					106418240	GSBRNA2T00029843001	LOC106418240; BNACNNG36560D	C9		0	10	2.18664e+07	2.55933e+07	2.40773e+07	2.18846e+07	2.51507e+07	2.64951e+07	High	High	High	High	High	High	1
High	Master Protein	A0A078IN27	Vacuolar proton pump subunit B OS=Brassica napus OX=3708 GN=BnaCnng20640D PE=3 SV=1	0	59.421	17	8	36	8	486	54	5.15	141	42.84	8	8	metabolic process;transport		catalytic activity;nucleotide binding;transporter activity	Pf00006, Pf00306, Pf02874	106347084	GSBRNA2T00003216001	LOC106347084	C5	Oxidative phosphorylation; Phagosome; Metabolic pathways	3	0	1.44632e+07	1.51379e+07	1.2529e+07	1.13216e+07	1.38168e+07	1.42515e+07	High	High	High	High	High	High	1
High	Master Protein	A0A078IA53	Peroxidase OS=Brassica napus OX=3708 GN=BnaA03g17000D PE=3 SV=1	0	59.341	22	5	35	5	330	37.1	6.96	192	57.91	5	4	metabolic process;response to stimulus	extracellular	antioxidant activity;catalytic activity;metal ion binding	Pf00141	106392662; 106441062	GSBRNA2T00086080001	LOC106392662; LOC106441062	A3	Biosynthesis of secondary metabolites; Metabolic pathways; Phenylpropanoid biosynthesis	3	0	5.83814e+06	5.93267e+06	4.69608e+06	5.20834e+06	5.88182e+06	6.02793e+06	High	High	High	High	High	High	1
High	Master Protein	A0A078H8M1	BnaCnng07570D protein OS=Brassica napus OX=3708 GN=BnaCnng07570D PE=3 SV=1	0	59.247	16	9	18	9	521	58.4	9.38	94	23.76	9	8	metabolic process		catalytic activity;RNA binding	Pf01472, Pf01509, Pf08068		GSBRNA2T00055310001				0	0	8.25781e+06	9.13072e+06	7.93837e+06	5.74044e+06	8.58404e+06	9.89332e+06	High	High	High	High	High	High	1
High	Master Protein	A0A078HUC8	BnaA01g32180D protein OS=Brassica napus OX=3708 GN=BnaA01g32180D PE=3 SV=1	0	59.028	20	6	34	3	391	43	10.2	166	56.04	6	5	metabolic process	ribosome	structural molecule activity	Pf00573, Pf14374		GSBRNA2T00072848001				0	0	3.44424e+06	3.31796e+06	3.03207e+06	2.80365e+06	3.401e+06	3.11893e+06	High	High	High	High	High	High	1
High	Master Protein	A0A078HAI0	BnaA02g06370D protein OS=Brassica napus OX=3708 GN=BnaC04g13200D PE=3 SV=1	0	59.018	18	6	53	6	428	47	9.09	281	104.87	6	6	metabolic process	cytoplasm	catalytic activity;nucleotide binding;RNA binding	Pf00009, Pf03143, Pf03144		GSBRNA2T00034600001; GSBRNA2T00056840001; GSBRNA2T00001459001; GSBRNA2T00048649001				0	0	6.93776e+07	7.01664e+07	6.20125e+07	6.07608e+07	7.57227e+07	7.81309e+07	High	High	High	High	High	High	1
High	Master Protein	A0A078I2B5	BnaAnng07540D protein OS=Brassica napus OX=3708 GN=BnaAnng07540D PE=3 SV=1	0	58.992	18	6	18	6	477	50	5.68	101	26.33	6	5		cytoplasm	catalytic activity;nucleotide binding	Pf00091, Pf12327		GSBRNA2T00077230001				0	0	2.98968e+06	2.92049e+06	2.40155e+06	2.5795e+06	3.0501e+06	3.19412e+06	High	High	High	High	High	High	1
High	Master Protein	A0A078I5U2	Coatomer subunit gamma OS=Brassica napus OX=3708 GN=BnaA07g03550D PE=3 SV=1	0	58.889	14	11	36	6	887	98.5	5.1	120	39.42	11	11	transport	cytoplasm;Golgi;membrane	structural molecule activity	Pf01602, Pf08752, Pf12717		GSBRNA2T00083433001				0	0	6.8026e+06	6.98544e+06	5.95148e+06	6.81797e+06	7.47391e+06	7.87965e+06	High	High	High	High	High	High	1
High	Master Protein	Q42623	Glutamine synthetase OS=Brassica napus OX=3708 GN=gln PE=2 SV=1	0	58.811	26	7	42	3	356	39.1	5.47	152	46.21	7	6	metabolic process		catalytic activity;nucleotide binding	Pf00120, Pf03951		GSBRNA2T00114519001				0	1	3.242e+06	3.62216e+06	2.77558e+06	2.68581e+06	3.40836e+06	3.60291e+06	High	High	High	High	High	High	1
High	Master Protein	D1L8U0	Photosystem I iron-sulfur center OS=Brassica napus OX=3708 GN=psaC PE=3 SV=1	0	58.81	63	5	21	5	81	9	7.08	96	28.63	5	5	metabolic process;transport	membrane	catalytic activity;metal ion binding	Pf00037, Pf12838, Pf13183, Pf13187, Pf13237, Pf14697	11542078		psaC		Metabolic pathways; Photosynthesis	2	0	5.62763e+06	5.74891e+06	4.8273e+06	5.69287e+06	5.87578e+06	7.32866e+06	High	High	High	High	High	High	1
High	Master Protein	A0A078FE18	Adenosine kinase OS=Brassica napus OX=3708 GN=BnaA03g00830D PE=3 SV=1	0	58.792	21	6	27	3	345	37.8	5.26	147	38.17	6	5	metabolic process		catalytic activity	Pf00294		GSBRNA2T00049270001				0	0	2.07164e+07	2.01014e+07	1.71051e+07	17568001	2.02088e+07	2.20375e+07	High	High	High	High	High	High	1
High	Master Protein	A0A078I0B7	BnaC06g01820D protein OS=Brassica napus OX=3708 GN=BnaC06g01820D PE=4 SV=1	0	58.761	16	9	35	1	774	86.9	5.36	119	33.84	9	7	metabolic process		catalytic activity;metal ion binding	Pf01433, Pf11940		GSBRNA2T00076328001				0	0	2.96894e+06	3.01888e+06	2.55958e+06	2.36169e+06	3.05119e+06	3.1992e+06	High	High	High	High	High	High	1
High	Master Protein	A0A078JTU5	BnaAnng29210D protein (Fragment) OS=Brassica napus OX=3708 GN=BnaAnng29210D PE=3 SV=1	0	58.74	21	8	35	4	477	52.3	6.8	142	36.5	8	6	metabolic process		catalytic activity;nucleotide binding	Pf00365		GSBRNA2T00082589001				0	4	1.23238e+07	1.25369e+07	9.75369e+06	9.36106e+06	1.13517e+07	1.16418e+07	High	High	High	High	High	High	1
High	Master Protein	A0A078FKC6	BnaA06g33370D protein OS=Brassica napus OX=3708 GN=BnaA06g33370D PE=4 SV=1	0	58.735	14	7	32	4	595	66.5	5.22	142	55.61	7	7			protein binding	Pf02985, Pf13646		GSBRNA2T00077992001				0	3	3.77012e+06	4.01191e+06	3.29742e+06	3.69089e+06	4.20604e+06	4.57036e+06	High	High	High	High	High	High	1
High	Master Protein	A0A078IDX6	BnaA04g15550D protein OS=Brassica napus OX=3708 GN=BnaA04g15550D PE=4 SV=1	0	58.677	37	8	29	1	179	20.5	4.83	145	34.97	7	7			metal ion binding;protein binding	Pf00036, Pf08726, Pf12763, Pf13202, Pf13405, Pf13499, Pf13833, Pf14658		GSBRNA2T00089006001				0	7	1.89543e+07	1.57181e+07	1.09135e+07	1.06086e+07	1.13833e+07	1.13362e+07	High	High	High	High	High	High	1
High	Master Protein	A0A078G608	BnaC06g01160D protein OS=Brassica napus OX=3708 GN=BnaC06g01160D PE=3 SV=1	0	58.671	23	6	30	3	392	42.4	5.1	158	35.93	6	5				Pf00079		GSBRNA2T00013235001				0	3	1.54612e+07	1.65405e+07	1.2311e+07	1.3676e+07	1.61652e+07	1.60629e+07	High	High	High	High	High	High	1
High	Master Protein	A0A078FAH6	Ubiquitin OS=Brassica napus OX=3708 GN=BnaA09g39760D PE=3 SV=1	0	58.664	36	5	179	1	157	17.7	9.8	712	226.09	5	4	metabolic process	ribosome	protein binding;structural molecule activity	Pf00240, Pf01599, Pf11976, Pf13019, Pf13881, Pf14560	106353312; 106368513; 106396774; 106452000	GSBRNA2T00053337001; GSBRNA2T00028961001; GSBRNA2T00049475001; GSBRNA2T00127087001; GSBRNA2T00156840001; GSBRNA2T00099088001	LOC106353312; LOC106368513; LOC106396774; LOC106452000	A7; A9; C4; C8	Ribosome	1	0	954465	940957	801455	931555	919203	1.09569e+06	High	High	High	High	High	High	1
High	Master Protein	A0A078K0U4	BnaAnng40430D protein (Fragment) OS=Brassica napus OX=3708 GN=BnaAnng40430D PE=4 SV=1	0	58.59	37	5	49	1	161	17.4	7.71	195	42.84	5	4	regulation of biological process		enzyme regulator activity	Pf04043		GSBRNA2T00026000001				0	0	2.17002e+06	2.48696e+06	1.82465e+06	2.95446e+06	3.34886e+06	4.33498e+06	High	High	High	High	High	High	1
High	Master Protein	C3S7F5	Oleosin S4-4 OS=Brassica napus OX=3708 GN=S4 PE=2 SV=1	0	58.56	20	5	64	2	220	23	9.11	264	80.47	5	5		membrane		Pf01277	106446163		LOC106446163	A4		0	0	6.6645e+07	6.66586e+07	7.39767e+07	8.81836e+07	8.92197e+07	8.88018e+07	High	High	High	High	High	High	1
High	Master Protein	A0A078FWM7	T-complex protein 1 subunit gamma OS=Brassica napus OX=3708 GN=BnaAnng03000D PE=3 SV=1	0	58.555	18	11	37	11	555	60.1	6.02	109	43.11	10	11	metabolic process	cytoplasm	nucleotide binding;protein binding	Pf00118		GSBRNA2T00006009001				0	0	3.46281e+07	3.4372e+07	2.76747e+07	3.32566e+07	3.55572e+07	4.08978e+07	High	High	High	High	High	High	1
High	Master Protein	A0A078HBL4	BnaA09g17790D protein OS=Brassica napus OX=3708 GN=BnaA09g17790D PE=3 SV=1	0	58.503	12	15	39	4	1075	121.9	6.84	95	41.1	14	15			catalytic activity;motor activity;nucleotide binding	Pf00261, Pf01576, Pf02263, Pf02463, Pf02841, Pf09726, Pf12718		GSBRNA2T00058027001				0	0	2.71863e+06	2.84993e+06	2.49534e+06	2.57979e+06	3.06533e+06	3.1886e+06	High	High	High	High	High	High	1
High	Master Protein	A0A078J598	Malate dehydrogenase OS=Brassica napus OX=3708 GN=BnaC03g78200D PE=3 SV=1	0	58.446	18	6	59	1	341	35.7	8.35	235	72.75	6	5	metabolic process		catalytic activity	Pf00056, Pf01073, Pf02866		GSBRNA2T00026045001				0	0	3.15004e+06	3.53257e+06	2.75551e+06	2.70276e+06	3.20546e+06	3.15678e+06	High	High	High	High	High	High	1
High	Master Protein	A0A078I9F5	Coatomer subunit beta' OS=Brassica napus OX=3708 GN=BnaC03g69270D PE=3 SV=1	0	58.278	8	6	29	1	955	108.2	4.89	119	43.59	5	6	transport	cytoplasm;Golgi;membrane	protein binding;structural molecule activity	Pf00400, Pf04053		GSBRNA2T00087608001				0	0	1.46476e+06	1.61926e+06	1.41045e+06	1.41529e+06	1.55636e+06	1.73117e+06	High	High	High	High	High	High	1
High	Master Protein	A0A078I806	BnaCnng13880D protein OS=Brassica napus OX=3708 GN=BnaCnng13880D PE=4 SV=1	0	58.167	36	8	46	8	240	27.6	8.53	134	54.44	8	8	development				106376931	GSBRNA2T00083568001	LOC106376931	C1		0	0	2.85319e+07	2.88832e+07	2.45018e+07	2.50849e+07	3.01278e+07	3.20312e+07	High	High	High	High	High	High	1
High	Master Protein	A0A078H6F7	Eukaryotic translation initiation factor 3 subunit I OS=Brassica napus OX=3708 GN=BnaA02g28950D PE=3 SV=1	0	58.005	31	8	33	2	330	36.4	6.8	143	20.3	8	3	cell organization and biogenesis;metabolic process;regulation of biological process	cytoplasm	protein binding;RNA binding	Pf00400		GSBRNA2T00056119001				0	0	455248	487564	434794	483087	516176	526515	High	High	High	High	High	High	1
High	Master Protein	A0A078HX00	40S ribosomal protein S3a OS=Brassica napus OX=3708 GN=BnaC05g47000D PE=3 SV=1	0	57.987	34	7	51	2	262	29.8	9.72	213	72.33	7	7	metabolic process	cytoplasm;ribosome	structural molecule activity	Pf01015	106427353; 106453081	GSBRNA2T00073883001; GSBRNA2T00097447001	LOC106427353; LOC106453081	C5; A5	Ribosome	1	1	4.94248e+06	4.97853e+06	4.9129e+06	4.70921e+06	5.80152e+06	6.3913e+06	High	High	High	High	High	High	1
High	Master Protein	A0A078J0K1	BnaCnng30450D protein OS=Brassica napus OX=3708 GN=BnaCnng30450D PE=3 SV=1	0	57.923	11	6	42	2	791	85.1	7.66	211	60.52	6	6	metabolic process		catalytic activity	Pf00933, Pf01915, Pf14310	106377238	GSBRNA2T00019633001	LOC106377238	C3	Metabolic pathways; Amino sugar and nucleotide sugar metabolism	2	0	521390	602990	495880	526779	558008	608814	High	High	High	High	High	High	1
High	Master Protein	A0A078GW05	BnaC01g19640D protein OS=Brassica napus OX=3708 GN=BnaC01g19640D PE=4 SV=1	0	57.915	26	6	60	6	250	27.5	6.06	252	69.67	6	6				Pf00310, Pf12481, Pf13537	106376105	GSBRNA2T00042281001	LOC106376105	C1		0	0	2.37677e+07	2.46471e+07	2.14027e+07	2.29908e+07	2.66106e+07	2.93671e+07	High	High	High	High	High	High	1
High	Master Protein	A0A078I3E7	BnaC02g32990D protein OS=Brassica napus OX=3708 GN=BnaC02g32990D PE=4 SV=1	0	57.906	39	4	58	1	154	17	5.31	277	69.63	4	3	regulation of biological process		enzyme regulator activity	Pf04043		GSBRNA2T00076974001				0	2	1.39035e+07	1.50197e+07	1.29591e+07	1.02291e+07	1.14879e+07	1.24641e+07	High	High	High	High	High	High	1
High	Master Protein	A0A078H8B7	Eukaryotic translation initiation factor 3 subunit B OS=Brassica napus OX=3708 GN=BnaA09g41220D PE=3 SV=1	0	57.888	15	7	33	3	714	82.1	5.39	137	39.07	7	7	cell organization and biogenesis;metabolic process;regulation of biological process	cytoplasm	protein binding;RNA binding	Pf00076, Pf04762, Pf08662	106368593	GSBRNA2T00057294001	LOC106368593	A9	RNA transport	1	4	5.97479e+06	6.52143e+06	5.08333e+06	5.23513e+06	5.71266e+06	6.77071e+06	High	High	High	High	High	High	1
High	Master Protein	A0A078HUS4	BnaC02g08760D protein OS=Brassica napus OX=3708 GN=BnaC02g08760D PE=3 SV=1	0	57.803	27	5	34	1	223	24.1	4.6	154	45.48	5	4	metabolic process		RNA binding	Pf00043, Pf00736, Pf13410	106380757	GSBRNA2T00074507001	LOC106380757	C2		0	0	2.71969e+06	2812961	2.45892e+06	2.36139e+06	2.92487e+06	2.58814e+06	High	High	High	High	High	High	1
High	Master Protein	A0A078F5E3	BnaA05g28220D protein OS=Brassica napus OX=3708 GN=BnaA05g28220D PE=3 SV=1	0	57.769	12	4	35	4	336	38	8.63	149	45.32	4	4	metabolic process	ribosome	catalytic activity;structural molecule activity	Pf00293, Pf00833		GSBRNA2T00000376001				0	0	1.28523e+07	1.43581e+07	1.06501e+07	1.26931e+07	1.6492e+07	1.7024e+07	High	High	High	High	High	High	1
High	Master Protein	A0A078H0N7	BnaA01g17140D protein OS=Brassica napus OX=3708 GN=BnaA01g17140D PE=4 SV=1	0	57.721	11	8	33	1	788	87.8	5.48	127	48.47	8	8			nucleotide binding	Pf00012		GSBRNA2T00051722001				0	0	676466	879752	720436	668127	741990	713558	High	High	High	High	High	High	1
High	Master Protein	A0A078GN07	Glyceraldehyde-3-phosphate dehydrogenase OS=Brassica napus OX=3708 GN=BnaA09g46780D PE=3 SV=1	0	57.719	20	6	55	3	399	42.6	7.71	262	69.3	6	5	metabolic process		catalytic activity;nucleotide binding	Pf00044, Pf02800		GSBRNA2T00035470001				0	2	1.92783e+07	2.09764e+07	1.60733e+07	1.69423e+07	1.86427e+07	2.25211e+07	High	High	High	High	High	High	1
High	Master Protein	P13244	Malate synthase, glyoxysomal OS=Brassica napus OX=3708 PE=2 SV=1	0	57.691	15	8	17	1	561	63.7	7.75	94	25.97	8	7	metabolic process		catalytic activity	Pf01274	106424075	GSBRNA2T00119622001	LOC106424075; LOC106425327	A2	Glyoxylate and dicarboxylate metabolism; Pyruvate metabolism; Biosynthesis of secondary metabolites; Metabolic pathways; Carbon metabolism	5	0	109304	106138	98205.1	129534	112473	133879	High	High	High	High	High	High	1
High	Master Protein	A0A078JKI9	Inositol-3-phosphate synthase (Fragment) OS=Brassica napus OX=3708 GN=BnaA01g34710D PE=3 SV=1	0	57.569	20	7	35	5	451	49.8	5.03	146	43.02	7	5	metabolic process		catalytic activity	Pf01658, Pf07994		GSBRNA2T00069156001				0	0	2.06197e+07	2.0746e+07	1.58887e+07	1.92605e+07	2.37946e+07	2.74882e+07	High	High	High	High	High	High	1
High	Master Protein	A0A078GZB3	BnaC04g27010D protein OS=Brassica napus OX=3708 GN=BnaC04g27010D PE=3 SV=1	0	57.551	31	8	55	3	377	41.7	5.39	216	72.19	8	7			nucleotide binding	Pf00022		GSBRNA2T00046318001				0	0	1.38157e+06	1.4444e+06	1.19546e+06	1.37707e+06	1.59181e+06	1.75187e+06	High	High	High	High	High	High	1
High	Master Protein	A0A078FJF0	Pyruvate kinase OS=Brassica napus OX=3708 GN=BnaC06g14360D PE=3 SV=1	0	57.45	16	6	37	6	527	57.4	7.27	168	45.72	6	5	metabolic process		catalytic activity;metal ion binding	Pf00224, Pf02887	106452438	GSBRNA2T00071317001	LOC106452438	C6	Biosynthesis of secondary metabolites; Biosynthesis of amino acids; Metabolic pathways; Pyruvate metabolism; Carbon metabolism; Purine metabolism; Glycolysis / Gluconeogenesis	7	0	1.13138e+07	1.14764e+07	9.70569e+06	1.05555e+07	1.1977e+07	1.29449e+07	High	High	High	High	High	High	1
High	Master Protein	A0A078J684	BnaCnng38880D protein OS=Brassica napus OX=3708 GN=BnaCnng38880D PE=2 SV=1	0	57.351	58	7	28	7	137	15.5	6.68	105	29.82	7	5				Pf00903, Pf12681	106419977	GSBRNA2T00034638001	BNAA09G49270D	A9		0	0	1.15606e+07	1.25775e+07	1.13357e+07	1.31069e+07	1.3715e+07	1.3584e+07	High	High	High	High	High	High	1
High	Master Protein	A0A078GX15	E1 ubiquitin-activating enzyme OS=Brassica napus OX=3708 GN=BnaA04g17280D PE=3 SV=1	0	57.208	9	8	32	2	1047	116.3	5.24	130	51.1	7	8	metabolic process		catalytic activity;nucleotide binding	Pf00899, Pf02134, Pf09358, Pf10585		GSBRNA2T00043477001				0	1	1.00903e+07	1.00337e+07	7.7851e+06	5.00802e+06	6.13602e+06	7.0718e+06	High	High	High	High	High	High	1
High	Master Protein	A0A078FER6	BnaA09g40100D protein OS=Brassica napus OX=3708 GN=BnaA09g40100D PE=4 SV=1	0	57.18	24	6	40	6	311	34.4	6.24	138	40.66	6	6				Pf13668	106420540	GSBRNA2T00049512001	LOC106420540	A9		0	0	2.55464e+07	3.32497e+07	2.44459e+07	2.34481e+07	2.98253e+07	2.83083e+07	High	High	High	High	High	High	1
High	Master Protein	A0A078HBF3	BnaA09g47450D protein OS=Brassica napus OX=3708 GN=BnaA09g47450D PE=3 SV=1	0	57.151	12	6	47	1	615	65.9	5.17	197	59.46	6	5	metabolic process	membrane	catalytic activity	Pf00026, Pf03489, Pf05184, Pf14543		GSBRNA2T00057373001				0	0	898123	968168	973088	1.01331e+06	1.12231e+06	1.15492e+06	High	High	High	High	High	High	1
High	Master Protein	A0A078HBM9	Sucrose-phosphate synthase OS=Brassica napus OX=3708 GN=BnaC09g37470D PE=3 SV=1	0	57.049	11	10	32	10	966	109.2	6.81	110	37.6	10	9	metabolic process		catalytic activity	Pf00534, Pf05116, Pf13524, Pf13692		GSBRNA2T00059319001				0	0	6.35881e+06	6.59062e+06	5.65779e+06	5.94115e+06	6.6964e+06	7.24394e+06	High	High	High	High	High	High	1
High	Master Protein	A0A078G7C3	BnaA06g37120D protein OS=Brassica napus OX=3708 GN=BnaA06g37120D PE=4 SV=1	0	56.895	15	9	19	9	783	85.8	4.97	80	25.79	7	9				Pf00226, Pf13355		GSBRNA2T00018877001				0	0	1.80949e+06	1.87087e+06	1.57952e+06	1.77941e+06	1.8652e+06	1.93832e+06	High	High	High	High	High	High	1
High	Master Protein	A0A078HZZ9	Proteasome subunit beta OS=Brassica napus OX=3708 GN=BnaA09g16030D PE=3 SV=1	0	56.755	38	6	22	1	245	27.5	6.42	92	28.62	6	6	metabolic process	cytoplasm;nucleus;proteasome	catalytic activity	Pf00227		GSBRNA2T00074642001				0	0	214452	203388	182441	179755	208695	261675	High	High	High	High	High	High	1
High	Master Protein	I7C3W2	Putative diaminopimelate decarboxylase OS=Brassica napus OX=3708 PE=3 SV=1	0	56.735	17	8	25	2	485	53.6	6.95	103	37.54	8	8	metabolic process		catalytic activity	Pf00278, Pf01168, Pf02784						0	0	470616	534100	418385	466945	606695	558376	High	High	High	High	High	High	1
High	Master Protein	A0A078J9U5	BnaA06g39060D protein OS=Brassica napus OX=3708 GN=BnaA06g39060D PE=3 SV=1	0	56.677	12	9	31	1	1088	121.9	6.02	104	29.63	9	7	metabolic process		catalytic activity;metal ion binding	Pf01433, Pf11940, Pf13485		GSBRNA2T00029747001				0	9	1.34441e+07	1.44747e+07	1.19619e+07	1.3385e+07	1.46666e+07	1.63187e+07	High	High	High	High	High	High	1
High	Master Protein	A0A078IUF6	BnaC09g54000D protein OS=Brassica napus OX=3708 GN=BnaC09g54000D PE=3 SV=1	0	56.639	15	10	32	2	736	81.6	5.91	112	41.86	9	10	metabolic process		catalytic activity;metal ion binding	Pf04551	106365752	GSBRNA2T00011113001	LOC106365752	C9	Terpenoid backbone biosynthesis; Metabolic pathways; Biosynthesis of secondary metabolites	3	8	7.30623e+06	7.30088e+06	6.0025e+06	6.31928e+06	7.49075e+06	7.76819e+06	High	High	High	High	High	High	1
High	Master Protein	A0A078F206	Ubiquitinyl hydrolase 1 OS=Brassica napus OX=3708 GN=BnaA05g27210D PE=3 SV=1	0	56.535	13	12	39	2	828	97.7	5.81	127	51.41	12	12	metabolic process		catalytic activity	Pf00443, Pf12436, Pf13423, Pf14533		GSBRNA2T00000253001				0	4	5.30188e+06	5.16977e+06	4.24241e+06	4.34449e+06	4.89605e+06	5.2406e+06	High	High	High	High	High	High	1
High	Master Protein	A0A078FZI4	BnaA09g08060D protein OS=Brassica napus OX=3708 GN=BnaA09g08060D PE=3 SV=1	0	56.482	17	8	39	8	440	47.5	7.56	136	51.25	8	8	metabolic process	cytoplasm	catalytic activity;metal ion binding	Pf00465, Pf01761, Pf13685		GSBRNA2T00005642001				0	0	3.0397e+07	3.08862e+07	2.66525e+07	2.55102e+07	3.10225e+07	3.25305e+07	High	High	High	High	High	High	1
High	Master Protein	A0A078JKZ0	Malate dehydrogenase OS=Brassica napus OX=3708 GN=BnaCnng55040D PE=3 SV=1	0	56.473	24	10	82	1	332	35.8	6.79	271	62.2	9	9	metabolic process		catalytic activity	Pf00056, Pf02866	106424310	GSBRNA2T00063599001	LOC106424310	C4	Metabolic pathways; Biosynthesis of secondary metabolites; Glyoxylate and dicarboxylate metabolism; Carbon metabolism; Carbon fixation in photosynthetic organisms; Cysteine and methionine metabolism; Citrate cycle (TCA cycle); Pyruvate metabolism	8	0	609389	625556	518149	591994	666593	678493	High	High	High	High	High	High	1
High	Master Protein	A0A078IF83	BnaC07g27420D protein OS=Brassica napus OX=3708 GN=BnaC07g27420D PE=4 SV=1	0	56.433	16	7	31	7	506	57.2	8.75	134	38.29	7	7	metabolic process		catalytic activity;nucleotide binding	Pf01073, Pf01370, Pf07993		GSBRNA2T00091532001				0	0	2.99355e+07	3.16607e+07	2.30316e+07	2.48892e+07	3.01879e+07	3.47229e+07	High	High	High	High	High	High	1
High	Master Protein	A0A078G5Y0	Phospholipase D OS=Brassica napus OX=3708 GN=BnaC01g35830D PE=3 SV=1	0	56.427	16	8	25	2	812	92	5.72	107	39.14	8	7	metabolic process	membrane	catalytic activity;metal ion binding;protein binding	Pf00168, Pf00614, Pf12357, Pf13091	106387492	GSBRNA2T00018169001	LOC106387492	C3	Metabolic pathways; Glycerophospholipid metabolism; Endocytosis; Ether lipid metabolism; Biosynthesis of secondary metabolites	5	0	481582	489340	392803	486606	525687	556715	High	High	High	High	High	High	1
High	Master Protein	A0A078GV44	Proteasome subunit alpha type OS=Brassica napus OX=3708 GN=BnaC07g32150D PE=3 SV=1	0	55.998	22	5	27	5	250	27.3	7.94	136	38.75	5	5	metabolic process	cytoplasm;nucleus;proteasome	catalytic activity	Pf00227, Pf10584	106440108	GSBRNA2T00041741001	LOC106440108	C7	Proteasome	1	0	1.07624e+07	1.23875e+07	9.88613e+06	8.93076e+06	1.14104e+07	1.24507e+07	High	High	High	High	High	High	1
High	Master Protein	A0A078FEM7	BnaC03g70960D protein OS=Brassica napus OX=3708 GN=BnaC03g70960D PE=4 SV=1	0	55.789	12	7	26	1	734	81.8	5.87	98	33.48	7	7	metabolic process		catalytic activity	Pf00326, Pf01738, Pf03283, Pf05448, Pf07859, Pf12695		GSBRNA2T00032470001				0	0	431116	420016	378631	469514	557184	578726	High	High	High	High	High	High	1
High	Master Protein	A0A078H1A8	BnaA10g13400D protein OS=Brassica napus OX=3708 GN=BnaA10g13400D PE=3 SV=1	0	55.757	13	9	30	1	741	82.2	6.21	106	39.97	8	9	metabolic process		catalytic activity;metal ion binding	Pf04551		GSBRNA2T00047845001				0	0	1.64966e+06	1.65951e+06	1.21675e+06	1.34831e+06	1.74701e+06	1.81704e+06	High	High	High	High	High	High	1
High	Master Protein	A0A078JI64	BnaCnng47180D protein OS=Brassica napus OX=3708 GN=BnaCnng47180D PE=3 SV=1	0	55.64	16	9	50	9	631	70	5.74	161	67.09	9	7		membrane	metal ion binding	Pf02225, Pf12662, Pf12947, Pf14670	106415524	GSBRNA2T00046597001	LOC106415524	C8		0	0	7.86869e+06	8.07409e+06	7.47202e+06	7.81943e+06	8.17531e+06	9.35799e+06	High	High	High	High	High	High	1
High	Master Protein	A0A078FL33	BnaA09g43480D protein OS=Brassica napus OX=3708 GN=BnaA09g43480D PE=3 SV=1	0	55.639	17	9	27	9	541	61.8	7.61	116	38.96	8	9		membrane	protein binding	Pf00168	106368802; 106376898; 106429454	GSBRNA2T00078293001	LOC106368802; LOC106376898; LOC106429454	A9; C1		0	0	8.89036e+06	8.67113e+06	8.15064e+06	8.01517e+06	9286392	9.8473e+06	High	High	High	High	High	High	1
High	Master Protein	A0A078HPM6	Delta-aminolevulinic acid dehydratase OS=Brassica napus OX=3708 GN=BnaA07g28250D PE=3 SV=1	0	55.396	24	8	33	8	426	46.4	7.37	126	40.75	8	6	metabolic process		catalytic activity;metal ion binding	Pf00490	106432555	GSBRNA2T00066545001	LOC106432555	A7	Porphyrin and chlorophyll metabolism; Metabolic pathways; Biosynthesis of secondary metabolites	3	0	1.96247e+07	2.09284e+07	1.67206e+07	1.68507e+07	1.96426e+07	1.95285e+07	High	High	High	High	High	High	1
High	Master Protein	A0A078H1E3	BnaC08g15540D protein OS=Brassica napus OX=3708 GN=BnaC08g15540D PE=4 SV=1	0	55.391	47	7	29	3	148	16.4	4.88	126	31.13	7	6			metal ion binding	Pf00036, Pf13405, Pf13499		GSBRNA2T00047412001				0	0	3.55725e+06	3.57864e+06	2.7186e+06	3.16737e+06	4.06094e+06	4.39476e+06	High	High	High	High	High	High	1
High	Master Protein	A0A078C6N9	40S ribosomal protein S3a OS=Brassica napus OX=3708 GN=BnaA03g52970D PE=3 SV=1	0	55.343	33	7	49	2	261	29.9	9.77	203	69.86	7	7	metabolic process	cytoplasm;ribosome	structural molecule activity	Pf01015		GSBRNA2T00100024001; GSBRNA2T00081784001				0	2	7.89785e+06	7.27044e+06	6.48667e+06	7.3819e+06	8.35201e+06	1.07782e+07	High	High	High	High	High	High	1
High	Master Protein	P27740	Napin-B OS=Brassica napus OX=3708 GN=NAPB PE=2 SV=1	0	55.337	30	5	79	1	178	20.1	7.62	361	110.48	5	5					106446307		LOC106446307	A1		0	1	7.69229e+07	8.49536e+07	8.27683e+07	7.40147e+07	8.76604e+07	9.76159e+07	High	High	High	High	High	High	1
High	Master Protein	A0A078EA13	BnaA02g10220D protein OS=Brassica napus OX=3708 GN=BnaA02g10220D PE=3 SV=1	0	55.289	40	3	20	1	134	15	5.16	103	42.5	3	3		membrane	metal ion binding	Pf00173	106380962; 106390655; 106390668	GSBRNA2T00041496001; GSBRNA2T00102341001	LOC106380962; LOC106390655; LOC106390668	C2; A2		0	0	3.58499e+06	3.99641e+06	3466363	3.06512e+06	3.75182e+06	3.96969e+06	High	High	High	High	High	High	1
High	Master Protein	A0A078J5J7	BnaA09g52180D protein OS=Brassica napus OX=3708 GN=BnaA09g52180D PE=3 SV=1	0	55.045	12	4	22	4	358	38.9	6.16	111	34.32	4	4	metabolic process;regulation of biological process		catalytic activity	Pf00112, Pf08127		GSBRNA2T00023283001				0	0	8.07247e+06	8.52029e+06	6.55327e+06	6.91313e+06	7.40748e+06	8.34617e+06	High	High	High	High	High	High	1
High	Master Protein	A0A078G7A3	BnaA06g36920D protein OS=Brassica napus OX=3708 GN=BnaA06g36920D PE=3 SV=1	0	54.937	23	8	34	7	460	50.5	5.81	150	39.27	7	6	metabolic process		catalytic activity	Pf00112, Pf00396, Pf08246		GSBRNA2T00018852001				0	1	2.87995e+07	3.03909e+07	2.50166e+07	2.40167e+07	2.68423e+07	3.05572e+07	High	High	High	High	High	High	1
High	Master Protein	A0A078IBV0	BnaC08g04620D protein OS=Brassica napus OX=3708 GN=BnaC08g04620D PE=4 SV=1	0	54.773	28	6	28	2	276	29.9	6.54	133	37.9	6	6				Pf00132	106405928	GSBRNA2T00087702001	LOC106405928	C8		0	5	7.14756e+06	7.2452e+06	5.91102e+06	6.05871e+06	6.7062e+06	7.53266e+06	High	High	High	High	High	High	1
High	Master Protein	A0A078GC31	Proteasome subunit alpha type OS=Brassica napus OX=3708 GN=BnaC02g25570D PE=3 SV=1	0	54.726	31	7	40	7	235	25.7	5.69	157	52.07	7	6	metabolic process	cytoplasm;nucleus;proteasome	catalytic activity	Pf00227, Pf10584	106381466; 106381527	GSBRNA2T00018693001; GSBRNA2T00036591001	LOC106381466; LOC106381527	C2; A2	Proteasome	1	0	3.08978e+07	3.3551e+07	2.6653e+07	2.63235e+07	3.33243e+07	3.34146e+07	High	High	High	High	High	High	1
High	Master Protein	A0A078IWZ6	CCT-eta OS=Brassica napus OX=3708 GN=BnaC03g73500D PE=3 SV=1	0	54.695	16	6	34	1	511	55	6.2	154	45.45	6	5	metabolic process	cytoplasm	nucleotide binding;protein binding	Pf00118		GSBRNA2T00011693001				0	0	7.94545e+06	8460191	5.8467e+06	6445690	8.09492e+06	8.68043e+06	High	High	High	High	High	High	1
High	Master Protein	A0A078G8K8	BnaA09g44720D protein OS=Brassica napus OX=3708 GN=BnaA09g44720D PE=3 SV=1	0	54.694	15	10	30	1	576	64	5.68	106	32.68	10	10			catalytic activity;nucleotide binding	Pf00009, Pf03143, Pf03144		GSBRNA2T00016220001				0	0	2.94905e+06	3.34786e+06	2585086	2.67093e+06	3.03552e+06	3.36956e+06	High	High	High	High	High	High	1
High	Master Protein	A0A078J386	BnaA10g28610D protein OS=Brassica napus OX=3708 GN=BnaA10g28610D PE=3 SV=1	0	54.584	20	5	25	2	392	42.4	5.22	142	30.87	5	4				Pf00079		GSBRNA2T00023065001				0	0	1.11949e+06	1.14738e+06	1.03592e+06	1.0691e+06	1.24771e+06	1.26561e+06	High	High	High	High	High	High	1
High	Master Protein	A0A078GTN8	BnaC02g36780D protein OS=Brassica napus OX=3708 GN=BnaC02g36780D PE=4 SV=1	0	54.493	18	4	23	4	307	33.6	6.29	121	38.67	4	4	metabolic process		metal ion binding	Pf02167, Pf13442		GSBRNA2T00040379001				0	0	9.70475e+06	1.04496e+07	8.93565e+06	8.91556e+06	9.71955e+06	1.02625e+07	High	High	High	High	High	High	1
High	Master Protein	A0A078G6S8	40S ribosomal protein S3a OS=Brassica napus OX=3708 GN=BnaA01g33400D PE=3 SV=1	0	54.432	26	6	43	1	261	29.8	9.74	184	62.74	6	6	metabolic process	cytoplasm;ribosome	structural molecule activity	Pf01015	106433407; 106445264	GSBRNA2T00015287001	LOC106433407; LOC106445264	A1	Ribosome	1	0	2.97273e+06	3142086	2.46798e+06	2.73865e+06	3.80503e+06	3521789	High	High	High	High	High	High	1
High	Master Protein	E1U691	Sulfate adenylyltransferase OS=Brassica napus OX=3708 PE=2 SV=1	0	54.395	20	8	33	1	465	51.9	8.41	127	37.67	8	7	metabolic process		catalytic activity	Pf01747, Pf14306	106369188		LOC106369188	C1	Sulfur metabolism; Selenocompound metabolism; Metabolic pathways; Purine metabolism; Monobactam biosynthesis	5	0	1.0497e+06	1.13885e+06	870907	902163	1.27254e+06	1.20914e+06	High	High	High	High	High	High	1
High	Master Protein	A0A078H2Z3	Calreticulin OS=Brassica napus OX=3708 GN=BnaCnng06700D PE=3 SV=1	0	54.314	19	8	38	3	422	47.9	4.53	126	44.69	8	8	metabolic process	endoplasmic reticulum	metal ion binding;protein binding	Pf00262	106453163	GSBRNA2T00051536001	LOC106453163	C8	Phagosome; Protein processing in endoplasmic reticulum	2	3	1.92964e+07	2.14617e+07	1.7377e+07	1.61815e+07	1.88167e+07	2.12538e+07	High	High	High	High	High	High	1
High	Master Protein	I7D138	Putative diaminopimelate decarboxylase OS=Brassica napus OX=3708 PE=3 SV=1	0	54.297	17	8	21	2	485	53.4	6.48	91	36.4	8	8	metabolic process		catalytic activity	Pf00278, Pf01168, Pf02784	106430932		LOC106430932	A10	Biosynthesis of secondary metabolites; Lysine biosynthesis; Biosynthesis of amino acids; Metabolic pathways	4	6	6.29387e+06	6.9766e+06	6.09699e+06	5.71246e+06	6.90698e+06	7.36356e+06	High	High	High	High	High	High	1
High	Master Protein	A0A078GMR2	V-type proton ATPase subunit C OS=Brassica napus OX=3708 GN=BnaA09g46810D PE=3 SV=1	0	54.278	13	9	31	1	614	70.5	6.87	105	40.09	8	9	transport		transporter activity	Pf03223		GSBRNA2T00035467001				0	8	1.55515e+07	1.57082e+07	1.29703e+07	1.27916e+07	1.58015e+07	1.76835e+07	High	High	High	High	High	High	1
High	Master Protein	A0A078JG29	BnaAnng20860D protein OS=Brassica napus OX=3708 GN=BnaAnng20860D PE=3 SV=1	0	54.275	12	9	27	1	711	79.6	5.57	99	32.37	8	9	metabolic process		catalytic activity;metal ion binding	Pf01432		GSBRNA2T00046974001				0	0	1.31965e+06	1388120	998308	1.12622e+06	1.36255e+06	1.43287e+06	High	High	High	High	High	High	1
High	Master Protein	A0A078J461	Adenylosuccinase OS=Brassica napus OX=3708 GN=BnaC01g40920D PE=3 SV=1	0	54.224	7	5	31	3	830	93	6.04	135	39.94	5	5	metabolic process;regulation of biological process	nucleus	catalytic activity;DNA binding	Pf00206, Pf00847, Pf08328		GSBRNA2T00030224001				0	2	8.4472e+06	8.89158e+06	7.67518e+06	7.57302e+06	8.76781e+06	9.4263e+06	High	High	High	High	High	High	1
High	Master Protein	A0A078FBT9	Anthocyanidin synthase OS=Brassica napus OX=3708 GN=BnaC01g14310D PE=2 SV=1	0	54.168	15	5	40	5	358	40.8	5.21	210	61.04	5	5	metabolic process		catalytic activity;metal ion binding	Pf03171, Pf14226	106375745	GSBRNA2T00048673001	LOC106375745	C1	Metabolic pathways; Biosynthesis of secondary metabolites; Flavonoid biosynthesis	3	0	1.34741e+07	1.30492e+07	1.09399e+07	1.3697e+07	1.63282e+07	1.69931e+07	High	High	High	High	High	High	1
High	Master Protein	A0A078HJU4	BnaC02g06410D protein OS=Brassica napus OX=3708 GN=BnaC02g06410D PE=3 SV=1	0	54.067	11	5	33	4	605	69	9.23	136	48.49	4	5	metabolic process	ribosome	structural molecule activity	Pf00561, Pf01251, Pf12146, Pf12695, Pf12697		GSBRNA2T00065415001				0	0	5.87693e+06	5.9084e+06	5.07324e+06	5.11725e+06	6.02553e+06	6.52942e+06	High	High	High	High	High	High	1
High	Master Protein	A0A078FFG3	BnaA09g17070D protein OS=Brassica napus OX=3708 GN=BnaA09g17070D PE=4 SV=1	0	53.96	29	10	42	1	301	33.8	7.97	149	44.05	9	10						GSBRNA2T00070957001				0	0	92558.8	115829	125031	75303	95584.1	113446	High	High	High	High	High	High	1
High	Master Protein	A0A078HV57	Calreticulin OS=Brassica napus OX=3708 GN=BnaA09g15400D PE=3 SV=1	0	53.956	22	9	51	4	423	48	4.6	180	71.62	8	8	metabolic process	endoplasmic reticulum	metal ion binding;protein binding	Pf00262	106386552	GSBRNA2T00073423001	LOC106386552	A9	Protein processing in endoplasmic reticulum; Phagosome	2	0	1.81547e+07	2.18542e+07	1.50625e+07	1.5716e+07	1.73268e+07	2.02966e+07	High	High	High	High	High	High	1
High	Master Protein	A0A078II13	BnaAnng10080D protein OS=Brassica napus OX=3708 GN=BnaAnng10080D PE=4 SV=1	0	53.842	19	7	42	4	343	37.9	6.39	164	59.89	7	7			protein binding	Pf01344, Pf07646, Pf09725, Pf13415, Pf13418, Pf13854, Pf13964		GSBRNA2T00092222001				0	3	7.4947e+07	8.26196e+07	7.13478e+07	7.37246e+07	8.05113e+07	8.02221e+07	High	High	High	High	High	High	1
High	Master Protein	A0A078GGE5	BnaA05g17460D protein OS=Brassica napus OX=3708 GN=BnaA05g17460D PE=3 SV=1	0	53.823	10	9	30	4	1086	120.3	9.28	122	41.95	9	9	regulation of biological process		protein binding	Pf02170, Pf02171, Pf08699, Pf12764		GSBRNA2T00023953001				0	5	8.79122e+06	9.20964e+06	7.93742e+06	7.9839e+06	9.50003e+06	1.09294e+07	High	High	High	High	High	High	1
High	Master Protein	A0A078HWZ7	Aspartate aminotransferase OS=Brassica napus OX=3708 GN=BnaC02g08820D PE=3 SV=1	0	53.776	15	7	49	6	405	44.1	7.61	217	51.23	7	7	metabolic process		catalytic activity	Pf00155	106380752	GSBRNA2T00074513001	LOC106380752	C2	Phenylalanine, tyrosine and tryptophan biosynthesis; Isoquinoline alkaloid biosynthesis; Biosynthesis of secondary metabolites; Arginine and proline metabolism; Tropane, piperidine and pyridine alkaloid biosynthesis; 2-Oxocarboxylic acid metabolism; Cysteine and methionine metabolism; Carbon metabolism; Alanine, aspartate and glutamate metabolism; Phenylalanine metabolism; Arginine biosynthesis; …	15	1	1.92828e+07	2.02179e+07	1.59164e+07	2.0085e+07	2.33654e+07	2.45957e+07	High	High	High	High	High	High	1
High	Master Protein	A0A078HGZ4	Prolyl endopeptidase OS=Brassica napus OX=3708 GN=BnaC06g03570D PE=3 SV=1	0	53.725	11	6	18	6	710	80.6	5.63	87	31.51	6	6	metabolic process		catalytic activity	Pf00326, Pf02897		GSBRNA2T00063382001				0	0	7.00361e+06	7.20016e+06	6.12856e+06	6.06636e+06	7.4527e+06	7.89598e+06	High	High	High	High	High	High	1
High	Master Protein	A0A078HN72	H(+)-exporting diphosphatase OS=Brassica napus OX=3708 GN=BnaC06g40530D PE=3 SV=1	0	53.518	9	8	39	2	769	80.6	5.12	147	48.06	8	8	transport	membrane	catalytic activity;transporter activity	Pf03030		GSBRNA2T00068861001				0	6	1.98023e+07	2.05577e+07	1.81309e+07	1.80866e+07	2.00149e+07	2.35411e+07	High	High	High	High	High	High	1
High	Master Protein	A0A078HP92	BnaA02g26890D protein OS=Brassica napus OX=3708 GN=BnaA02g26890D PE=4 SV=1	0	53.492	23	5	14	3	400	43.5	5.85	93	31.37	5	4		membrane	protein binding	Pf00400	106388843	GSBRNA2T00069569001	LOC106388843		Protein processing in endoplasmic reticulum	1	2	5.82054e+06	6.37998e+06	5.00882e+06	6.07707e+06	6.97406e+06	7.30961e+06	High	High	High	High	High	High	1
High	Master Protein	A0A078GUD1	Isopentenyl-diphosphate Delta-isomerase OS=Brassica napus OX=3708 GN=BnaCnng05930D PE=3 SV=1	0	53.479	22	5	25	1	278	31.8	6.44	122	36.55	5	5	metabolic process		catalytic activity	Pf00293		GSBRNA2T00041344001				0	0	52266.2	56680.7	43220.1	41159.8	49487.9	51233.7	High	High	High	High	High	High	1
High	Master Protein	A0A078HYV0	BnaA06g22960D protein OS=Brassica napus OX=3708 GN=BnaA06g22960D PE=3 SV=1	0	53.429	14	8	29	8	645	73	6.34	106	38.65	8	7	metabolic process		catalytic activity	Pf01055		GSBRNA2T00077257001				0	0	9.75595e+06	1.01406e+07	7.74431e+06	8.32724e+06	9.19151e+06	1.06212e+07	High	High	High	High	High	High	1
High	Master Protein	A0A078HJ60	60S ribosomal protein L13 OS=Brassica napus OX=3708 GN=BnaA06g19150D PE=3 SV=1	0	53.415	29	5	26	2	206	23.6	10.92	166	30.93	5	4	metabolic process	ribosome	structural molecule activity	Pf01294	106365518	GSBRNA2T00064890001	LOC106365518	A9	Ribosome	1	3	2.89683e+07	2.27605e+07	2.72886e+07	2.42712e+07	3.28786e+07	3.71319e+07	High	High	High	High	High	High	1
High	Master Protein	A0A078HWP8	Methylenetetrahydrofolate reductase OS=Brassica napus OX=3708 GN=BnaA09g38220D PE=3 SV=1	0	53.324	13	7	42	6	592	66.2	5.76	179	52.56	7	7	metabolic process	cytosol	catalytic activity	Pf02219	106368417	GSBRNA2T00072602001	LOC106368417	A9	Carbon metabolism; One carbon pool by folate; Metabolic pathways	3	0	1.31895e+07	1.38961e+07	1.16074e+07	1.10084e+07	1.20425e+07	1.36666e+07	High	High	High	High	High	High	1
High	Master Protein	A0A078DNQ5	ATP synthase subunit d, mitochondrial OS=Brassica napus OX=3708 GN=BnaA04g05550D PE=3 SV=1	0	53.309	40	8	53	8	168	19.6	5.02	197	66.65	8	8	metabolic process;transport	membrane;mitochondrion	transporter activity	Pf05873	106440060; 106445684; 106448516	GSBRNA2T00021744001; GSBRNA2T00151248001	LOC106440060; LOC106445684; LOC106448516	A3; A4; A1	Oxidative phosphorylation; Metabolic pathways	2	0	3.13725e+07	3.30171e+07	2.85328e+07	28253638	3.3581e+07	3.57176e+07	High	High	High	High	High	High	1
High	Master Protein	A0A078IFF3	BnaA02g30030D protein OS=Brassica napus OX=3708 GN=BnaA02g30030D PE=3 SV=1	0	53.256	29	6	47	6	403	41.3	6.25	262	59.4	6	4	metabolic process		catalytic activity	Pf00108, Pf00109, Pf02803	106374831	GSBRNA2T00091644001	LOC106374831	C1		0	0	1.06187e+07	1.08485e+07	9.04129e+06	1.17899e+07	1.24286e+07	1.35503e+07	High	High	High	High	High	High	1
High	Master Protein	A0A078H4R1	Elongation factor G, chloroplastic OS=Brassica napus OX=3708 GN=BnaC09g13110D PE=3 SV=1	0	53.201	9	4	14	1	775	85.2	5.92	96	30.85	4	4	metabolic process		catalytic activity;nucleotide binding;RNA binding	Pf00009, Pf00679, Pf01926, Pf03144, Pf03764, Pf14492	106399314	GSBRNA2T00050545001	LOC106399314	C9		0	3	2.50292e+06	2.80605e+06	2.11854e+06	2.2901e+06	2.77966e+06	2.86296e+06	High	High	High	High	High	High	1
High	Master Protein	A0A078I3G5	BnaA04g20380D protein OS=Brassica napus OX=3708 GN=BnaA04g20380D PE=4 SV=1	0	53.16	37	9	48	3	305	34.8	8.66	184	57.89	9	9	metabolic process		catalytic activity;nucleotide binding	Pf08031		GSBRNA2T00076999001				0	7	1.42489e+07	1.59257e+07	1.25964e+07	1.50589e+07	1.64471e+07	1.88659e+07	High	High	High	High	High	High	1
High	Master Protein	A0A078GCT9	Ubiquitin carboxyl-terminal hydrolase OS=Brassica napus OX=3708 GN=BnaA06g02150D PE=3 SV=1	0	53.062	19	7	28	2	481	54	6.34	131	40.87	7	7	metabolic process		catalytic activity;protein binding	Pf00240, Pf00443, Pf13423		GSBRNA2T00021218001				0	5	8.88304e+06	9.11466e+06	8.02737e+06	8.7166e+06	1.03722e+07	1.06917e+07	High	High	High	High	High	High	1
High	Master Protein	A0A078H5K1	BnaA02g08040D protein OS=Brassica napus OX=3708 GN=BnaA02g08040D PE=4 SV=1	0	52.974	12	8	21	8	770	84.2	8.19	84	30.56	8	8			protein binding;RNA binding	Pf02847, Pf02854		GSBRNA2T00052796001				0	0	6.2398e+06	6.86312e+06	5.94032e+06	6.86306e+06	7.33808e+06	7.3069e+06	High	High	High	High	High	High	1
High	Master Protein	A0A078H413	BnaA07g04390D protein OS=Brassica napus OX=3708 GN=BnaA07g04390D PE=3 SV=1	0	52.896	9	6	21	3	751	79.7	7.52	98	27.54	6	5	metabolic process		catalytic activity	Pf00082, Pf02225, Pf05922		GSBRNA2T00054277001				0	4	7.43812e+06	7.8368e+06	6.60419e+06	6.64424e+06	7.78021e+06	8.27087e+06	High	High	High	High	High	High	1
High	Master Protein	A0A078J7T6	NADH-cytochrome b5 reductase OS=Brassica napus OX=3708 GN=BnaAnng16000D PE=3 SV=1	0	52.859	36	7	20	2	281	31.4	8.13	91	34.87	7	7	metabolic process	membrane	catalytic activity	Pf00175, Pf00970, Pf08030		GSBRNA2T00025876001				0	0	5.1825e+06	5.52286e+06	4.86197e+06	5.21335e+06	5.95551e+06	6.37426e+06	High	High	High	High	High	High	1
High	Master Protein	A0A078GSE8	BnaA06g13760D protein OS=Brassica napus OX=3708 GN=BnaA06g13760D PE=3 SV=1	0	52.828	22	3	23	3	213	23.5	6.15	123	41.37	3	3			protein binding	Pf02798, Pf13409, Pf13410, Pf13417	106346950	GSBRNA2T00043017001	LOC106346950	A6		0	0	8.24595e+06	8.82786e+06	7.36031e+06	8.77945e+06	1.06381e+07	1.04426e+07	High	High	High	High	High	High	1
High	Master Protein	A0A078GII6	T-complex protein 1 subunit delta OS=Brassica napus OX=3708 GN=BnaC05g35160D PE=3 SV=1	0	52.727	18	8	21	8	533	57.4	7.44	80	29.19	8	8	metabolic process	cytoplasm	nucleotide binding;protein binding	Pf00118	106436251	GSBRNA2T00026691001	LOC106436251	C5		0	0	1.66637e+07	1.70099e+07	1.38392e+07	1.56938e+07	1.80277e+07	1.94048e+07	High	High	High	High	High	High	1
High	Master Protein	A0A078HYI0	BnaA08g00150D protein OS=Brassica napus OX=3708 GN=BnaA08g00150D PE=4 SV=1	0	52.724	14	8	28	2	730	81.5	5.88	98	33.26	8	8	metabolic process		catalytic activity;protein binding	Pf00326, Pf01738, Pf03283, Pf05448, Pf07859, Pf12695	106354106	GSBRNA2T00074686001	LOC106354106; BNAA08G00150D	A8		0	6	7.88043e+06	7887306	6.64975e+06	7.9209e+06	8.82946e+06	9.84521e+06	High	High	High	High	High	High	1
High	Master Protein	A0A078IJU5	Serine hydroxymethyltransferase OS=Brassica napus OX=3708 GN=BnaC03g61150D PE=3 SV=1	0	52.646	15	7	32	5	517	57.3	8.32	127	30.66	7	7	metabolic process		catalytic activity	Pf00155, Pf00464	106389757	GSBRNA2T00093575001	LOC106389757	C3	Biosynthesis of secondary metabolites; Glycine, serine and threonine metabolism; Glyoxylate and dicarboxylate metabolism; Carbon metabolism; Metabolic pathways; Cyanoamino acid metabolism; One carbon pool by folate; Biosynthesis of amino acids	8	0	7.74717e+06	7.21338e+06	5.85125e+06	7.79122e+06	9.48697e+06	9.30114e+06	High	High	High	High	High	High	1
High	Master Protein	A0A078G8E8	BnaA09g44120D protein OS=Brassica napus OX=3708 GN=BnaA09g44120D PE=3 SV=1	0	52.572	16	6	18	3	506	55.7	5.88	88	28.04	6	5		nucleus	protein binding	Pf00400, Pf12265		GSBRNA2T00016146001				0	0	1.54347e+06	1.6334e+06	1.41438e+06	1.45334e+06	1.54701e+06	1.89121e+06	High	High	High	High	High	High	1
High	Master Protein	A0A078J4Y4	ADP,ATP carrier protein OS=Brassica napus OX=3708 GN=BnaA07g38360D PE=3 SV=1	0	52.571	13	5	31	5	616	67.5	9.35	132	28.84	5	4	transport	membrane	nucleotide binding;transporter activity	Pf03219		GSBRNA2T00022545001				0	0	1.2028e+07	1.23988e+07	1.12288e+07	1.29719e+07	1.42854e+07	1.46607e+07	High	High	High	High	High	High	1
High	Master Protein	A0A078IH23	BnaA03g50850D protein OS=Brassica napus OX=3708 GN=BnaA03g50850D PE=3 SV=1	0	52.538	27	5	23	2	258	29	5.29	117	16.13	5	3	metabolic process		catalytic activity	Pf01596, Pf12847, Pf13578	106441142	GSBRNA2T00092687001	LOC106441142	A3		0	0	317754	342893	242676	281329	325087	379267	High	High	High	High	High	High	1
High	Master Protein	A0A078FY58	Pyruvate decarboxylase OS=Brassica napus OX=3708 GN=BnaA10g09270D PE=3 SV=1	0	52.531	14	7	34	1	607	65.5	6.09	136	29	7	7			catalytic activity;metal ion binding	Pf00205, Pf02775, Pf02776		GSBRNA2T00095381001				0	7	2.04069e+07	2.0574e+07	1.68764e+07	1.91688e+07	2.05395e+07	2.44025e+07	High	High	High	High	High	High	1
High	Master Protein	A0A078J6S7	BnaC05g49280D protein OS=Brassica napus OX=3708 GN=BnaC05g49280D PE=4 SV=1	0	52.521	12	5	28	1	611	67.7	7.64	114	59.15	4	5	metabolic process		catalytic activity	Pf00106, Pf01073, Pf01370, Pf02719, Pf04321, Pf07993, Pf13460, Pf13950		GSBRNA2T00028395001				0	0	756401	710130	614124	650896	730737	821892	High	High	High	High	High	High	1
High	Master Protein	A0A078J344	Glucose-1-phosphate adenylyltransferase OS=Brassica napus OX=3708 GN=BnaA06g40730D PE=3 SV=1	0	52.502	15	8	26	6	595	66.4	8	106	36.35	8	6	metabolic process		catalytic activity;nucleotide binding	Pf00483		GSBRNA2T00020056001				0	2	1.14651e+07	1.15305e+07	9.22569e+06	8.88792e+06	1.10707e+07	1.13057e+07	High	High	High	High	High	High	1
High	Master Protein	A0A078JJ77	BnaCnng55730D protein OS=Brassica napus OX=3708 GN=BnaCnng55730D PE=4 SV=1	0	52.457	24	5	24	1	276	29.9	6.54	117	35.35	5	5				Pf00132		GSBRNA2T00065231001				0	0	3669677	3.80706e+06	3.19775e+06	3.33969e+06	3.91292e+06	4.01021e+06	High	High	High	High	High	High	1
High	Master Protein	A0A078HJL2	BnaC04g31350D protein OS=Brassica napus OX=3708 GN=BnaC04g31350D PE=4 SV=1	0	52.454	12	7	20	7	647	73.3	5.83	73	25.88	7	5			DNA binding;metal ion binding;protein binding	Pf02892, Pf05699, Pf14372	106426558	GSBRNA2T00064836001	LOC106426558	C4		0	0	4.98976e+06	4.80072e+06	4.33324e+06	5.01208e+06	5.69477e+06	6.14699e+06	High	High	High	High	High	High	1
High	Master Protein	A0A078IH04	Citrate synthase OS=Brassica napus OX=3708 GN=BnaA09g55310D PE=3 SV=1	0	52.407	16	7	37	3	507	55.8	8.63	146	48.25	7	6	metabolic process		catalytic activity	Pf00285	106396466	GSBRNA2T00092644001	LOC106396466	A4	Carbon metabolism; Glyoxylate and dicarboxylate metabolism; 2-Oxocarboxylic acid metabolism; Biosynthesis of amino acids; Biosynthesis of secondary metabolites; Metabolic pathways; Citrate cycle (TCA cycle)	7	0	12370028	12730214	1.08417e+07	9.95693e+06	1.17395e+07	1.24057e+07	High	High	High	High	High	High	1
High	Master Protein	A0A078G5H7	BnaA09g44710D protein OS=Brassica napus OX=3708 GN=BnaA09g44710D PE=4 SV=1	0	52.301	16	4	25	2	250	26.9	6.8	168	47.55	4	4			protein binding	Pf00400		GSBRNA2T00016219001				0	2	1.70131e+07	1.7384e+07	1.50499e+07	1.4e+07	1.83728e+07	1.96056e+07	High	High	High	High	High	High	1
High	Master Protein	A0A078HBW2	BnaA01g13760D protein OS=Brassica napus OX=3708 GN=BnaA01g13760D PE=4 SV=1	0	52.254	10	7	20	7	824	93	6.05	96	32.59	7	7	metabolic process		protein binding;RNA binding	Pf00076, Pf05391, Pf14259		GSBRNA2T00056302001				0	0	4.96534e+06	5.47882e+06	4.44786e+06	5.06792e+06	5.76571e+06	6.59874e+06	High	High	High	High	High	High	1
High	Master Protein	A0A078JAA1	BnaCnng40790D protein OS=Brassica napus OX=3708 GN=BnaCnng40790D PE=4 SV=1	0	52.009	26	7	19	7	387	41.2	9.38	88	32.39	7	6				Pf00581	106377277	GSBRNA2T00037486001	LOC106377277	A8		0	0	5.63458e+06	5.72282e+06	5.01984e+06	5.28229e+06	6.29693e+06	6.50897e+06	High	High	High	High	High	High	1
High	Master Protein	A0A078IP83	BnaCnng19800D protein OS=Brassica napus OX=3708 GN=BnaCnng19800D PE=4 SV=1	0	51.835	32	6	24	4	217	24.1	6.6	109	43.74	5	6	regulation of biological process;response to stimulus		catalytic activity;nucleotide binding	Pf00025, Pf00071, Pf01926, Pf05783, Pf08477	106397030	GSBRNA2T00097721001	LOC106397030	C5	Endocytosis	1	2	1.39149e+07	1.4863e+07	1.16722e+07	1.38329e+07	1.7271e+07	1.78155e+07	High	High	High	High	High	High	1
High	Master Protein	Q7Y0H9	40S ribosomal protein S6 OS=Brassica napus OX=3708 GN=RPS6 PE=2 SV=1	0	51.819	14	5	38	1	249	28.2	10.59	192	55.31	5	5	metabolic process	ribosome	structural molecule activity	Pf01092	106373247		LOC106373247	A1	Ribosome	1	0	555282	477492	516496	495128	635852	776060	High	High	High	High	High	High	1
High	Master Protein	A0A078G0X7	Protein disulfide-isomerase OS=Brassica napus OX=3708 GN=BnaC05g03010D PE=3 SV=1	0	51.803	18	6	17	6	436	47.1	7.33	71	25.44	6	6	cellular homeostasis;regulation of biological process		catalytic activity	Pf00085, Pf13098, Pf13848, Pf13905		GSBRNA2T00002813001				0	0	5.00744e+06	5.28884e+06	4.45172e+06	4.26951e+06	5.00314e+06	5.02893e+06	High	High	High	High	High	High	1
High	Master Protein	A0A078G265	V-type proton ATPase subunit C OS=Brassica napus OX=3708 GN=BnaC05g09300D PE=3 SV=1	0	51.756	21	9	31	2	377	42.8	5.54	97	39.07	8	9	transport		transporter activity	Pf03223	106401476	GSBRNA2T00008972001	LOC106401476	C5	Oxidative phosphorylation; Phagosome; Metabolic pathways	3	0	1.50882e+06	1.38336e+06	1.26668e+06	1.00595e+06	1.1965e+06	1.30934e+06	High	High	High	High	High	High	1
High	Master Protein	A0A078HDY6	BnaA06g10080D protein OS=Brassica napus OX=3708 GN=BnaA06g10080D PE=4 SV=1	0	51.731	18	7	35	2	389	42.8	8.13	131	52.61	7	7	metabolic process		catalytic activity;metal ion binding	Pf00174, Pf03404		GSBRNA2T00062240001				0	5	1.70076e+07	1.82825e+07	1.56747e+07	1.52569e+07	1.82382e+07	1.82109e+07	High	High	High	High	High	High	1
High	Master Protein	A0A078G3M9	V-type proton ATPase subunit C OS=Brassica napus OX=3708 GN=BnaA08g24550D PE=3 SV=1	0	51.712	21	9	31	1	376	42.7	5.67	100	39.41	8	9	transport		transporter activity	Pf03223		GSBRNA2T00015241001				0	0							High	High	High	High	High	High	1
High	Master Protein	A0A078H6S6	tRNA (guanine-N(7)-)-methyltransferase non-catalytic subunit OS=Brassica napus OX=3708 GN=BnaA09g50980D PE=3 SV=1	0	51.678	6	6	16	1	1149	125.2	6.42	73	26.74	6	6	metabolic process	nucleus	catalytic activity;metal ion binding;nucleotide binding;protein binding	Pf00289, Pf00364, Pf00400, Pf02222, Pf02785, Pf02786, Pf07478, Pf08443, Pf12700, Pf13533, Pf13535, Pf15632		GSBRNA2T00052478001				0	5	8.43421e+06	8.96788e+06	7.18609e+06	7.31907e+06	8.56596e+06	9.11495e+06	High	High	High	High	High	High	1
High	Master Protein	T2C548	Phospholipase D OS=Brassica napus OX=3708 GN=PLD4 PE=2 SV=1	0	51.627	15	9	25	3	812	91.9	5.63	104	32	9	8	metabolic process	membrane	catalytic activity;metal ion binding;protein binding	Pf00168, Pf00614, Pf12357, Pf13091	106349653		LOC106349653	A1	Biosynthesis of secondary metabolites; Metabolic pathways; Glycerophospholipid metabolism; Endocytosis; Ether lipid metabolism	5	2	9.05731e+06	9.47451e+06	7.25749e+06	8.73279e+06	1.04148e+07	1.1799e+07	High	High	High	High	High	High	1
High	Master Protein	A0A078GIU2	Prolyl-tRNA synthetase OS=Brassica napus OX=3708 GN=BnaC06g18340D PE=3 SV=1	0	51.557	21	8	31	4	540	61.8	7.09	131	45.02	8	6	metabolic process	cytoplasm	catalytic activity;nucleotide binding	Pf00587, Pf03129, Pf09180		GSBRNA2T00028951001				0	4	6.89738e+06	7.31378e+06	6.04646e+06	6.38707e+06	7.8956e+06	8.11127e+06	High	High	High	High	High	High	1
High	Master Protein	A0A078JAY3	BnaC01g42220D protein OS=Brassica napus OX=3708 GN=BnaC01g42220D PE=4 SV=1	0	51.553	34	6	23	6	200	23	5.19	93	29.34	6	5			metal ion binding	Pf00036, Pf13202, Pf13405, Pf13499, Pf13833		GSBRNA2T00037567001				0	0	2.34662e+06	2.40593e+06	1.91866e+06	2.0514e+06	2.38528e+06	2.48995e+06	High	High	High	High	High	High	1
High	Master Protein	A0A078G3Y7	Glutathione synthetase OS=Brassica napus OX=3708 GN=BnaA09g03700D PE=3 SV=1	0	51.544	18	7	24	7	458	51.6	6.2	99	35.28	7	6	metabolic process		catalytic activity;metal ion binding;nucleotide binding;protein binding	Pf03199, Pf03917		GSBRNA2T00009449001				0	0	5.35704e+06	5.3609e+06	4.24595e+06	4.38186e+06	5.42701e+06	5.52568e+06	High	High	High	High	High	High	1
High	Master Protein	A0A078GKT6	BnaA08g07930D protein OS=Brassica napus OX=3708 GN=BnaA08g07930D PE=4 SV=1	0	51.537	40	6	181	2	154	17.2	5.69	707	223.57	6	4			protein binding	Pf00240, Pf11976, Pf13019, Pf13881, Pf14560	106400214; 106415199	GSBRNA2T00061675001; GSBRNA2T00037002001	LOC106400214; LOC106415199	A8; C8		0	4	8.5222e+07	8.8788e+07	8.15177e+07	8.61016e+07	9.98724e+07	1.11128e+08	High	High	High	High	High	High	1
High	Master Protein	A0A078J7L7	BnaA10g29280D protein OS=Brassica napus OX=3708 GN=BnaA10g29280D PE=3 SV=1	0	51.535	32	4	24	3	188	21.5	6.96	127	33.07	4	3	transport		transporter activity	Pf00061, Pf08212	106371578	GSBRNA2T00037502001	LOC106371578	A10		0	1	1.06243e+07	1.17094e+07	1.07902e+07	1.09814e+07	1.18574e+07	1.23845e+07	High	High	High	High	High	High	1
High	Master Protein	A0A078I4W4	BnaA02g04260D protein OS=Brassica napus OX=3708 GN=BnaA02g04260D PE=3 SV=1	0	51.495	27	5	34	1	224	24.1	4.63	150	45.48	5	4	metabolic process		RNA binding	Pf00043, Pf00736, Pf13410	106425797	GSBRNA2T00081077001	LOC106425797	A2		0	4	4.17498e+07	4.2088e+07	3.63308e+07	3.76395e+07	4.05166e+07	4.50484e+07	High	High	High	High	High	High	1
High	Master Protein	A0A078GCD4	BnaC03g57320D protein OS=Brassica napus OX=3708 GN=BnaC03g57320D PE=4 SV=1	0	51.488	17	9	28	9	600	67.8	8.54	111	44.8	9	9	metabolic process	membrane	catalytic activity;nucleotide binding	Pf01565, Pf04030		GSBRNA2T00024727001				0	0	6.98298e+06	7.52414e+06	5.88273e+06	5.97322e+06	7.05261e+06	7428667	High	High	High	High	High	High	1
High	Master Protein	A0A078HUC7	BnaA08g20540D protein OS=Brassica napus OX=3708 GN=BnaA08g20540D PE=4 SV=1	0	51.393	18	9	28	1	478	52.8	6.58	107	33.99	9	8	metabolic process		catalytic activity	Pf00155	106434229	GSBRNA2T00073054001	LOC106434229	C8	Biosynthesis of secondary metabolites; Alanine, aspartate and glutamate metabolism; Biosynthesis of amino acids; Carbon fixation in photosynthetic organisms; Arginine biosynthesis; Glyoxylate and dicarboxylate metabolism; Glycine, serine and threonine metabolism; Carbon metabolism; 2-Oxocarboxylic acid metabolism; Metabolic pathways	10	3	1.32843e+07	1.23821e+07	1.06403e+07	1.06793e+07	1.14073e+07	1.30502e+07	High	High	High	High	High	High	1
High	Master Protein	A0A078JK01	BnaA10g30270D protein OS=Brassica napus OX=3708 GN=BnaA10g30270D PE=3 SV=1	0	51.2	10	8	27	6	1019	113.3	5.52	105	35.74	8	8	metabolic process		catalytic activity;nucleotide binding	Pf00899, Pf02134, Pf09358, Pf10585		GSBRNA2T00066925001				0	0	9.28905e+06	1.0128e+07	8.38112e+06	9.83977e+06	1.05689e+07	1.1607e+07	High	High	High	High	High	High	1
High	Master Protein	A0A078FEF1	BnaA03g01600D protein OS=Brassica napus OX=3708 GN=BnaA03g01600D PE=4 SV=1	0	51.102	14	7	17	7	558	62.2	5.16	68	29.02	7	7				Pf12222		GSBRNA2T00049369001				0	0	4.7871e+06	5.3422e+06	4.48795e+06	4.66133e+06	5.48836e+06	5.48763e+06	High	High	High	High	High	High	1
High	Master Protein	A0A078HQR8	BnaC06g40590D protein OS=Brassica napus OX=3708 GN=BnaC06g40590D PE=4 SV=1	0	51.099	12	10	22	3	971	110.5	8.43	82	27.41	10	10			protein binding	Pf00515, Pf07719, Pf12569, Pf13371, Pf13414, Pf13432		GSBRNA2T00068870001				0	0	3.84212e+06	3.70465e+06	3.45804e+06	3.51718e+06	3.86869e+06	4.1747e+06	High	High	High	High	High	High	1
High	Master Protein	A0A078G0P4	BnaA01g26230D protein OS=Brassica napus OX=3708 GN=BnaA01g26230D PE=3 SV=1	0	51.089	11	11	30	2	1140	127.5	5.49	112	34.54	11	9	metabolic process		catalytic activity;metal ion binding	Pf00675, Pf05193, Pf08367		GSBRNA2T00005618001				0	0	636826	711665	576719	633740	690448	754232	High	High	High	High	High	High	1
High	Master Protein	A0A078IJ78	BnaC06g42190D protein OS=Brassica napus OX=3708 GN=BnaC06g42190D PE=3 SV=1	0	51.053	14	7	30	6	598	67.7	5.8	120	30.91	7	7			protein binding	Pf02020		GSBRNA2T00098237001				0	1	1.09997e+07	1.22034e+07	9.38547e+06	1.01535e+07	1.12061e+07	1.38382e+07	High	High	High	High	High	High	1
High	Master Protein	A0A078HVZ2	Cysteine synthase OS=Brassica napus OX=3708 GN=BnaC05g46930D PE=3 SV=1	0	50.99	26	6	27	6	321	33.9	5.22	109	31.77	6	5	metabolic process		catalytic activity	Pf00291		GSBRNA2T00073891001				0	0	4.67312e+07	4.88987e+07	3.92449e+07	3.02848e+07	3.32352e+07	3.65086e+07	High	High	High	High	High	High	1
High	Master Protein	A0A078CSQ4	Guanosine nucleotide diphosphate dissociation inhibitor OS=Brassica napus OX=3708 GN=GDI1 PE=2 SV=1	0	50.955	16	6	39	1	444	49.6	6.06	145	49.29	6	5	metabolic process;regulation of biological process;response to stimulus;transport		catalytic activity;enzyme regulator activity	Pf00996	106396076	GSBRNA2T00132610001	LOC106396076	A5		0	0	5.08243e+06	5.38848e+06	3.71712e+06	4.22375e+06	5.30383e+06	5.48341e+06	High	High	High	High	High	High	1	Acetyl [N-Term]
High	Master Protein	P01090	Napin-2 OS=Brassica napus OX=3708 PE=2 SV=2	0	50.862	30	5	104	1	178	20.1	6.87	363	128.39	5	5					106391998		LOC106391998	C1		0	5	5.01121e+07	5.54205e+07	5.34363e+07	6.10168e+07	7.26387e+07	7.56406e+07	High	High	High	High	High	High	1
High	Master Protein	A0A078F4A0	BnaA06g15400D protein OS=Brassica napus OX=3708 GN=BnaA06g15400D PE=4 SV=1	0	50.856	19	10	27	10	667	73.9	7.71	118	23.24	10	6				Pf07676		GSBRNA2T00125488001				0	0	2.34907e+07	2.5525e+07	1.86658e+07	1.75624e+07	2.09767e+07	2.16589e+07	High	High	High	High	High	High	1
High	Master Protein	A0A078JJT8	BnaC02g46730D protein OS=Brassica napus OX=3708 GN=BnaC02g46730D PE=4 SV=1	0	50.732	14	8	24	6	554	62.9	6.18	88	31.33	8	8			protein binding	Pf00515, Pf07719, Pf13414, Pf13424, Pf13431, Pf13432		GSBRNA2T00046922001				0	0	2.75515e+06	2.70138e+06	2.39856e+06	2.36393e+06	2.76019e+06	2717867	High	High	High	High	High	High	1
High	Master Protein	A0A078HJV7	Formyltetrahydrofolate synthetase OS=Brassica napus OX=3708 GN=BnaC06g03660D PE=3 SV=1	0	50.715	14	8	26	8	633	67.7	7.01	105	38.77	8	8	metabolic process		catalytic activity;nucleotide binding	Pf01268		GSBRNA2T00063367001				0	0	5.43078e+06	5.78499e+06	4.67823e+06	4.60496e+06	5.68189e+06	5.81913e+06	High	High	High	High	High	High	1
High	Master Protein	A0A078IYX5	BnaC09g41420D protein OS=Brassica napus OX=3708 GN=BnaC09g41420D PE=3 SV=1	0	50.696	17	4	13	4	348	38.4	5.07	78	22.59	4	4	metabolic process		catalytic activity	Pf03214	106372223	GSBRNA2T00017046001	LOC106372223	C9	Amino sugar and nucleotide sugar metabolism	1	0	2.27414e+06	2.42725e+06	1.85299e+06	2.29918e+06	2.5925e+06	2.82469e+06	High	High	High	High	High	High	1
High	Master Protein	A0A078IGW6	Serine hydroxymethyltransferase OS=Brassica napus OX=3708 GN=BnaCnng17010D PE=3 SV=1	0	50.683	18	8	35	6	509	56.5	8.48	126	34.3	8	8	metabolic process		catalytic activity	Pf00155, Pf00464, Pf01212	106401847	GSBRNA2T00092583001	LOC106401847		Biosynthesis of secondary metabolites; One carbon pool by folate; Biosynthesis of amino acids; Glyoxylate and dicarboxylate metabolism; Glycine, serine and threonine metabolism; Carbon metabolism; Metabolic pathways; Cyanoamino acid metabolism	8	2	1.19879e+07	1.16457e+07	9.50819e+06	1.1322e+07	1.33392e+07	1.39945e+07	High	High	High	High	High	High	1
High	Master Protein	X2GCS5	CPK5-2.1 OS=Brassica napus OX=3708 GN=CPK5-2.1 PE=2 SV=1	0	50.672	13	7	24	3	544	61.1	5.68	92	39.2	7	6	metabolic process	membrane	catalytic activity;metal ion binding;nucleotide binding	Pf00036, Pf00069, Pf06293, Pf07714, Pf13202, Pf13405, Pf13499, Pf13833, Pf14531	106375257	GSBRNA2T00130916001	LOC106375257	C1	Plant-pathogen interaction	1	4	1.91582e+06	2.04288e+06	1.69216e+06	2.01501e+06	2.25301e+06	2.3254e+06	High	High	High	High	High	High	1
High	Master Protein	A0A078III1	BnaA09g39240D protein OS=Brassica napus OX=3708 GN=BnaA09g39240D PE=3 SV=1	0	50.648	13	4	29	1	471	51.5	6.65	135	44.65	4	4	metabolic process		catalytic activity	Pf00295, Pf12708, Pf13229		GSBRNA2T00091999001				0	0	1.46574e+06	1.56113e+06	1.23779e+06	1.23897e+06	1.37729e+06	1.44967e+06	High	High	High	High	High	High	1
High	Master Protein	A0A078JTE2	BnaAnng31280D protein OS=Brassica napus OX=3708 GN=BnaAnng31280D PE=3 SV=1	0	50.636	10	7	23	5	779	89.3	9.06	77	32.22	6	7		membrane	protein binding	Pf00168, Pf08372		GSBRNA2T00091805001				0	2	1.1244e+07	1.13856e+07	9.24143e+06	1.05118e+07	1.24901e+07	1.38538e+07	High	High	High	High	High	High	1
High	Master Protein	A0A078JF82	Coproporphyrinogen oxidase OS=Brassica napus OX=3708 GN=BnaCnng43160D PE=3 SV=1	0	50.615	23	8	31	4	393	44.6	6.99	106	31.67	7	7	metabolic process		catalytic activity	Pf01218		GSBRNA2T00040907001				0	4	2.86159e+07	2.79907e+07	2.51632e+07	2.5897e+07	2.8734e+07	3.21349e+07	High	High	High	High	High	High	1
High	Master Protein	A0A078G7H0	BnaA08g25580D protein OS=Brassica napus OX=3708 GN=BnaA08g25580D PE=3 SV=1	0	50.6	6	7	16	3	1372	153.9	6.38	73	24.51	7	7	metabolic process		catalytic activity;nucleotide binding	Pf01326		GSBRNA2T00015115001				0	0	1.20408e+06	1.17678e+06	997003	964160	1.09991e+06	1.15725e+06	High	High	High	High	High	High	1
High	Master Protein	A0A078F439	60S ribosomal protein L13 OS=Brassica napus OX=3708 GN=BnaA06g16250D PE=3 SV=1	0	50.549	26	4	24	1	206	23.6	10.92	138	30.15	4	3	metabolic process	ribosome	structural molecule activity	Pf01294	106347447	GSBRNA2T00125376001	LOC106347447	A6	Ribosome	1	0	1.10457e+06	1.07247e+06	1.041e+06	1.09995e+06	1.25285e+06	1.2896e+06	High	High	High	High	High	High	1
High	Master Protein	A0A078HZT2	BnaA09g31220D protein OS=Brassica napus OX=3708 GN=BnaA09g31220D PE=4 SV=1	0	50.488	18	9	27	1	478	53	6.7	103	33.99	9	8	metabolic process		catalytic activity	Pf00155	106440992	GSBRNA2T00079579001; GSBRNA2T00119372001	LOC106440992	A9	Carbon fixation in photosynthetic organisms; Arginine biosynthesis; Biosynthesis of secondary metabolites; Glyoxylate and dicarboxylate metabolism; Glycine, serine and threonine metabolism; Carbon metabolism; 2-Oxocarboxylic acid metabolism; Metabolic pathways; Alanine, aspartate and glutamate metabolism; Biosynthesis of amino acids	10	0	500569	463112	355463	405905	500770	573588	High	High	High	High	High	High	1
High	Master Protein	A0A078JAK4	BnaC04g55510D protein OS=Brassica napus OX=3708 GN=BnaC04g55510D PE=3 SV=1	0	50.291	28	7	21	1	292	33.1	5.33	110	30.74	7	7	transport		protein binding	Pf13424, Pf14938		GSBRNA2T00037630001				0	0	653178	707808	517156	556414	731984	768443	High	High	High	High	High	High	1
High	Master Protein	A0A078FR27	BnaA08g28500D protein OS=Brassica napus OX=3708 GN=BnaA08g28500D PE=3 SV=1	0	50.29	14	8	26	2	833	93	5.99	98	29.41	8	7			catalytic activity;nucleotide binding	Pf00009, Pf00679, Pf03144, Pf03764, Pf14492		GSBRNA2T00089743001				0	6	3.23275e+06	3.43042e+06	2.82828e+06	2.95107e+06	3.36777e+06	3.55358e+06	High	High	High	High	High	High	1
High	Master Protein	A0A078HK27	Alanine--glyoxylate transaminase OS=Brassica napus OX=3708 GN=BnaA09g08290D PE=3 SV=1	0	50.29	16	4	23	4	401	44.1	8.28	168	42.5	4	3			catalytic activity	Pf00266	106366360; 106396365	GSBRNA2T00063691001	LOC106366360; LOC106396365	A9; C4	Biosynthesis of secondary metabolites; Glyoxylate and dicarboxylate metabolism; Peroxisome; Carbon metabolism; Metabolic pathways; Alanine, aspartate and glutamate metabolism; Glycine, serine and threonine metabolism	7	0	6.55342e+06	6.76373e+06	5.80218e+06	6.26084e+06	7.12288e+06	7.40945e+06	High	High	High	High	High	High	1
High	Master Protein	A0A078FJJ5	Peptidylprolyl isomerase OS=Brassica napus OX=3708 GN=BnaC04g26680D PE=4 SV=1	0	50.279	14	7	17	4	642	72.8	5.8	74	17.81	7	6	cell differentiation;metabolic process	membrane	catalytic activity;protein binding	Pf00254, Pf13414, Pf13424, Pf13432, Pf14559		GSBRNA2T00071033001				0	4	2.41588e+06	2.3677e+06	1.91382e+06	2.30967e+06	2.45701e+06	2.68425e+06	High	High	High	High	High	High	1
High	Master Protein	A0A078F501	BnaA06g15390D protein OS=Brassica napus OX=3708 GN=BnaA06g15390D PE=4 SV=1	0	50.254	16	10	35	10	704	77.6	8.76	132	38.22	10	9	metabolic process		protein binding	Pf00930, Pf07676		GSBRNA2T00125489001				0	0	3.91126e+07	4.24703e+07	3.1447e+07	3.23992e+07	3.85512e+07	4.0473e+07	High	High	High	High	High	High	1
High	Master Protein	A0A078FEM2	Prolyl-tRNA synthetase OS=Brassica napus OX=3708 GN=BnaA09g39700D PE=3 SV=1	0	50.244	18	7	27	3	559	63.7	6.51	118	41.7	7	5	metabolic process	cytoplasm	catalytic activity;nucleotide binding	Pf00587, Pf03129, Pf09180		GSBRNA2T00049468001				0	0	1.43703e+07	1.4227e+07	1.28675e+07	1.30177e+07	1.52525e+07	1.54511e+07	High	High	High	High	High	High	1
High	Master Protein	A0A078JC50	BnaC03g76410D protein OS=Brassica napus OX=3708 GN=BnaC03g76410D PE=4 SV=1	0	50.21	19	9	30	1	493	56.4	8.37	109	34.31	9	8	transport		protein binding;structural molecule activity	Pf00400, Pf06957		GSBRNA2T00034381001				0	1	1.47295e+06	1.26553e+06	1.25979e+06	1.53861e+06	1.50063e+06	1.72814e+06	High	High	High	High	High	High	1
High	Master Protein	A0A078HH05	BnaA02g19750D protein OS=Brassica napus OX=3708 GN=BnaA02g19750D PE=4 SV=1	0	50.179	13	11	24	4	898	102.2	7.77	83	28.89	11	11			protein binding	Pf00515, Pf07719, Pf12569, Pf13371, Pf13414, Pf13432		GSBRNA2T00064229001				0	7	1.01796e+07	9.44775e+06	8.16565e+06	9.04744e+06	1.04246e+07	1.10173e+07	High	High	High	High	High	High	1
High	Master Protein	A0A078J4C5	BnaA08g20300D protein OS=Brassica napus OX=3708 GN=BnaA08g20300D PE=3 SV=1	0	50.172	12	5	39	2	537	58.6	7.33	143	51.29	5	5	metabolic process		catalytic activity	Pf00171		GSBRNA2T00020791001				0	0	696098	750470	628787	618214	658022	744224	High	High	High	High	High	High	1
High	Master Protein	A0A078FZ28	BnaC09g30560D protein OS=Brassica napus OX=3708 GN=BnaC09g30560D PE=3 SV=1	0	50.109	18	5	29	3	364	40	5.45	122	29.76	5	4	metabolic process		catalytic activity;protein binding	Pf00891, Pf05891, Pf08100, Pf12847, Pf13489	106383915	GSBRNA2T00002874001	LOC106383915	C4		0	0	2.59229e+06	2.52065e+06	2.2442e+06	3.4564e+06	4.03231e+06	4.61319e+06	High	High	High	High	High	High	1
High	Master Protein	A0A078IR54	Proteasome subunit alpha type OS=Brassica napus OX=3708 GN=BnaA09g15700D PE=3 SV=1	0	50.064	32	7	36	7	275	29.9	5.2	148	40.41	7	7	metabolic process	cytoplasm;nucleus;proteasome	catalytic activity	Pf00227, Pf10584		GSBRNA2T00006807001				0	0	1.62238e+07	1.72854e+07	1.3473e+07	1.53828e+07	1.67318e+07	1.82561e+07	High	High	High	High	High	High	1
High	Master Protein	Q39344	Brassica napus napB napin OS=Brassica napus OX=3708 PE=3 SV=1	0	49.939	30	5	107	1	178	20.2	7.61	387	141.76	5	5					106391998		LOC106391998	C1		0	0	1.4001e+07	1.47589e+07	1.26166e+07	9.05811e+06	1.11845e+07	1.196e+07	High	High	High	High	High	High	1
High	Master Protein	A0A078GF28	BnaC03g17470D protein OS=Brassica napus OX=3708 GN=BnaC03g17470D PE=3 SV=1	0	49.93	31	7	25	2	325	35.2	5.48	102	31.07	7	6	metabolic process		catalytic activity	Pf00294	106437745; 106445702	GSBRNA2T00142082001; GSBRNA2T00024448001	LOC106437745; LOC106445702	A3; C3	Starch and sucrose metabolism; Amino sugar and nucleotide sugar metabolism; Metabolic pathways; Fructose and mannose metabolism	4	5	1.47232e+07	1.46984e+07	1.19757e+07	1.28505e+07	1.56972e+07	1.55551e+07	High	High	High	High	High	High	1
High	Master Protein	A0A078H3I4	Ubiquitin carboxyl-terminal hydrolase OS=Brassica napus OX=3708 GN=BnaC03g41700D PE=3 SV=1	0	49.658	12	9	34	6	797	88.6	5.25	115	40.65	9	9	metabolic process		catalytic activity;metal ion binding;protein binding	Pf00443, Pf00627, Pf02148, Pf13423	106389274; 106389348	GSBRNA2T00051961001	LOC106389274; LOC106389348	C3		0	3	1.92669e+07	1.9474e+07	1.67507e+07	1.75982e+07	1.97401e+07	2.14715e+07	High	High	High	High	High	High	1
High	Master Protein	A0A078H673	BnaC03g27700D protein OS=Brassica napus OX=3708 GN=BnaC03g27700D PE=3 SV=1	0	49.639	17	5	23	5	361	40.6	6.05	110	31.41	5	5	metabolic process		catalytic activity	Pf00112, Pf03051, Pf08246		GSBRNA2T00055918001				0	0	1.56408e+07	1.61202e+07	1.14559e+07	8.61075e+06	9.35854e+06	1.07719e+07	High	High	High	High	High	High	1
High	Master Protein	A0A078JS18	Cysteine synthase OS=Brassica napus OX=3708 GN=BnaAnng27260D PE=3 SV=1	0	49.637	31	8	30	3	322	33.9	5.59	102	17.99	8	6	metabolic process		catalytic activity	Pf00291	106360617	GSBRNA2T00074219001	LOC106360617	A8	Cysteine and methionine metabolism; Biosynthesis of secondary metabolites; Biosynthesis of amino acids; Sulfur metabolism; Metabolic pathways; Carbon metabolism	6	7	6.60982e+07	6.74635e+07	5.51457e+07	5.6875e+07	7.10421e+07	6.70396e+07	High	High	High	High	High	High	1
High	Master Protein	A0A078F1H1	Glutamine amidotransferase OS=Brassica napus OX=3708 GN=BnaC09g12810D PE=3 SV=1	0	49.553	18	8	17	3	535	59.3	6.6	69	24.83	8	7	metabolic process		catalytic activity;nucleotide binding	Pf00117, Pf00733, Pf00958, Pf03054, Pf07722		GSBRNA2T00000003001				0	5	7.01357e+06	7.26684e+06	5.79074e+06	6.19815e+06	7.99813e+06	8.29851e+06	High	High	High	High	High	High	1
High	Master Protein	A0A078FGC8	BnaAnng02090D protein OS=Brassica napus OX=3708 GN=BnaAnng02090D PE=3 SV=1	0	49.548	24	7	43	3	261	29.8	4.83	130	45.88	7	6			protein binding	Pf00244	106432579	GSBRNA2T00060932001	LOC106432579	A9		0	1	9.69803e+06	9.83386e+06	7.91101e+06	9.15588e+06	1.0089e+07	1.11614e+07	High	High	High	High	High	High	1
High	Master Protein	A0A078GJA7	Delta(24)-sterol reductase OS=Brassica napus OX=3708 GN=BnaA05g19350D PE=4 SV=1	0	49.546	20	9	76	3	561	65.1	7.81	259	66.71	9	7	metabolic process	membrane	catalytic activity;nucleotide binding	Pf01565	106425138	GSBRNA2T00026945001; GSBRNA2T00029467001	LOC106425138	C5	Biosynthesis of secondary metabolites; Steroid biosynthesis; Metabolic pathways	3	0	2.75415e+06	2.92604e+06	2.319e+06	2.59253e+06	2.84204e+06	3.17594e+06	High	High	High	High	High	High	1
High	Master Protein	A0A076U3R7	Guanosine nucleotide diphosphate dissociation inhibitor OS=Brassica napus OX=3708 GN=GDI1 PE=2 SV=1	0	49.483	16	6	38	1	444	49.5	6.06	141	50.12	6	5	metabolic process;regulation of biological process;response to stimulus;transport		catalytic activity;enzyme regulator activity	Pf00996	106396325	GSBRNA2T00002228001	LOC106396325	C4		0	7	1.98786e+07	1.99193e+07	1.56252e+07	1.80704e+07	2.0816e+07	2.47302e+07	High	High	High	High	High	High	1	Acetyl [N-Term]
High	Master Protein	A0A078J1Z8	BnaAnng14520D protein OS=Brassica napus OX=3708 GN=BnaAnng14520D PE=3 SV=1	0	49.48	5	3	22	1	760	79.7	6.76	120	35.51	3	3	metabolic process		catalytic activity	Pf00082, Pf05922	106358297	GSBRNA2T00022217001	LOC106358297	A7		0	0	2.6911e+06	3.04025e+06	2.26716e+06	2.4617e+06	2.7777e+06	2.75747e+06	High	High	High	High	High	High	1
High	Master Protein	A0A078FIV1	BnaA10g06850D protein OS=Brassica napus OX=3708 GN=BnaA10g06850D PE=3 SV=1	0	49.311	35	3	20	1	156	17.7	5.25	111	41.74	3	3		membrane	metal ion binding	Pf00173		GSBRNA2T00078997001				0	2	8.70479e+06	8.60731e+06	7.60871e+06	7.5791e+06	8.5483e+06	8.47459e+06	High	High	High	High	High	High	1
High	Master Protein	A0A078G370	BnaC04g11470D protein OS=Brassica napus OX=3708 GN=BnaC04g11470D PE=3 SV=1	0	49.177	14	5	42	5	463	48.6	8.21	186	50.76	5	4	metabolic process		catalytic activity	Pf00108, Pf02803		GSBRNA2T00009021001				0	0	9.67758e+06	9.87286e+06	9.22331e+06	9.3948e+06	9.34379e+06	1.04217e+07	High	High	High	High	High	High	1
High	Master Protein	A0A078IDE0	Lysine--tRNA ligase OS=Brassica napus OX=3708 GN=BnaAnng09530D PE=3 SV=1	0	49.117	9	5	36	5	618	70	6.11	131	54.58	5	5	metabolic process	cytoplasm	catalytic activity;nucleotide binding;RNA binding	Pf00152, Pf01336, Pf01409	106351199	GSBRNA2T00088440001	LOC106351199	A1	Aminoacyl-tRNA biosynthesis	1	0	6.8462e+06	6.6237e+06	5.70766e+06	6.07298e+06	6.86766e+06	7.5009e+06	High	High	High	High	High	High	1
High	Master Protein	A0A078K2G4	Methionine adenosyltransferase OS=Brassica napus OX=3708 GN=BnaCnng75920D PE=3 SV=1	0	49.023	28	8	27	5	365	39.9	5.97	115	30.86	8	6	metabolic process		catalytic activity;nucleotide binding	Pf00438, Pf02772, Pf02773		GSBRNA2T00023699001; GSBRNA2T00018367001				0	3	1.5655e+07	1.63255e+07	1.38692e+07	1.25045e+07	1.62076e+07	1.65231e+07	High	High	High	High	High	High	1
High	Master Protein	A0A078G5S4	40S ribosomal protein SA OS=Brassica napus OX=3708 GN=BnaC04g36490D PE=3 SV=1	0	48.941	16	4	27	4	292	32.1	5.25	99	25.52	4	3	cell organization and biogenesis;metabolic process	cytoplasm;ribosome	structural molecule activity	Pf00318	106446640	GSBRNA2T00012237001	LOC106446640	C4	Ribosome	1	0	1.24307e+07	1.31587e+07	1.218e+07	1.1733e+07	1.39194e+07	1.54336e+07	High	High	High	High	High	High	1
High	Master Protein	A0A078HW55	BnaA01g05530D protein OS=Brassica napus OX=3708 GN=BnaA01g05530D PE=4 SV=1	0	48.926	21	7	20	7	369	41.3	8.43	90	22.25	7	7			nucleotide binding	Pf01926, Pf02421, Pf02824	106352938; 106439041	GSBRNA2T00075136001; GSBRNA2T00073977001	LOC106352938; LOC106439041	A1; C1		0	0	5.31038e+06	5.47898e+06	4.43473e+06	5.12252e+06	5.85582e+06	6.41274e+06	High	High	High	High	High	High	1
High	Master Protein	A0A078I6C5	BnaA05g29380D protein OS=Brassica napus OX=3708 GN=BnaA05g29380D PE=4 SV=1	0	48.89	10	7	19	7	873	96.4	4.75	93	18.17	7	6	transport	nucleus	protein binding;transporter activity	Pf03810, Pf13513		GSBRNA2T00080644001				0	0	3.76455e+06	3.90572e+06	3.21421e+06	3.46171e+06	3.793e+06	4.39361e+06	High	High	High	High	High	High	1
High	Master Protein	A0A078H8T5	BnaA01g19300D protein OS=Brassica napus OX=3708 GN=BnaA01g19300D PE=3 SV=1	0	48.888	18	8	34	4	393	43.2	6.7	115	45.95	8	8				Pf00557		GSBRNA2T00054031001				0	4	4.30939e+07	4.12635e+07	3.59225e+07	3.52294e+07	4.2388e+07	4.59115e+07	High	High	High	High	High	High	1
High	Master Protein	A0A078HDR3	BnaA01g27710D protein OS=Brassica napus OX=3708 GN=BnaA01g27710D PE=3 SV=1	0	48.786	42	6	30	3	168	19	4.73	127	41.41	6	6				Pf00838	106390833	GSBRNA2T00057548001	LOC106390833	A1		0	3	2.12672e+07	2.32931e+07	1.58949e+07	1.76093e+07	2.07829e+07	2.43656e+07	High	High	High	High	High	High	1
High	Master Protein	A0A078IS09	BnaAnng11560D protein OS=Brassica napus OX=3708 GN=BnaAnng11560D PE=3 SV=1	0	48.542	20	5	65	5	274	30.2	5.67	248	99.48	4	5	metabolic process		catalytic activity	Pf04199	106453151	GSBRNA2T00007442001	LOC106453151	A1		0	0	4.29831e+07	4.62367e+07	3.57488e+07	3.91267e+07	4.793e+07	5.14449e+07	High	High	High	High	High	High	1
High	Master Protein	A0A078IXE4	Oxoglutarate dehydrogenase (succinyl-transferring) OS=Brassica napus OX=3708 GN=BnaA07g37870D PE=3 SV=1	0	48.46	9	8	26	4	899	102.1	6.8	94	36.12	8	7	metabolic process		catalytic activity	Pf00676, Pf02779		GSBRNA2T00011249001				0	0	753055	733981	710137	677537	698605	835262	High	High	High	High	High	High	1
High	Master Protein	A0A078JDA6	BnaC03g74920D protein OS=Brassica napus OX=3708 GN=BnaC03g74920D PE=3 SV=1	0	48.411	5	6	20	6	1192	129.5	6.05	83	29.11	6	6	transport	cytoplasm	metal ion binding	Pf00626, Pf01541, Pf04810, Pf04811, Pf04815, Pf08033		GSBRNA2T00036225001				0	0	5.80214e+06	5.84147e+06	4.81263e+06	5.19103e+06	6.30367e+06	6.42238e+06	High	High	High	High	High	High	1
High	Master Protein	A0A078GK30	Peroxidase OS=Brassica napus OX=3708 GN=BnaA04g12860D PE=3 SV=1	0	48.322	26	8	27	3	329	36.7	6.79	106	35.55	8	7	metabolic process;regulation of biological process;response to stimulus	extracellular	antioxidant activity;catalytic activity;metal ion binding	Pf00141, Pf08689		GSBRNA2T00032859001				0	6	8.68471e+06	8.25291e+06	7.17884e+06	1.00136e+07	1.0719e+07	1.23134e+07	High	High	High	High	High	High	1
High	Master Protein	X2D378	Calcium-dependent protein kinase 4.1 OS=Brassica napus OX=3708 GN=CPK4.1 PE=2 SV=1	0	48.272	15	7	32	4	500	56.3	5.33	119	38.24	7	7	metabolic process	membrane	catalytic activity;metal ion binding;nucleotide binding	Pf00036, Pf00069, Pf06293, Pf07714, Pf13202, Pf13405, Pf13499, Pf13833, Pf14531	106438489		LOC106438489	A3	Plant-pathogen interaction	1	3	8.98242e+06	9.12826e+06	8.00185e+06	8.08537e+06	8.7267e+06	9.93608e+06	High	High	High	High	High	High	1
High	Master Protein	A0A078F5N0	Pyruvate, phosphate dikinase OS=Brassica napus OX=3708 GN=BnaC07g33060D PE=3 SV=1	0	48.234	10	8	23	4	955	103.9	5.96	89	32.47	8	7	metabolic process		catalytic activity;metal ion binding;nucleotide binding	Pf00391, Pf01326, Pf02896	106400973; 106445812	GSBRNA2T00031454001	LOC106400973; LOC106445812	C1; A3	Pyruvate metabolism; Carbon fixation in photosynthetic organisms; Carbon metabolism; Metabolic pathways	4	4	5.29761e+06	5.56348e+06	4.54268e+06	4.91267e+06	5.81497e+06	6.03112e+06	High	High	High	High	High	High	1
High	Master Protein	A0A078GYM2	BnaC04g31650D protein OS=Brassica napus OX=3708 GN=BnaC04g31650D PE=4 SV=1	0	48.223	28	7	39	7	314	35.8	4.7	117	42.41	7	7						GSBRNA2T00044890001				0	0	8.44952e+06	9.00371e+06	7.99138e+06	6.9717e+06	8.23795e+06	9.80391e+06	High	High	High	High	High	High	1
High	Master Protein	A0A078CLN7	BnaA01g26560D protein OS=Brassica napus OX=3708 GN=BnaA01g26560D PE=3 SV=1	0	48.216	41	3	29	3	112	12.2	9.69	149	36.5	3	2	metabolic process	ribosome	structural molecule activity	Pf01248	106346897; 106375222; 106375223; 106389228; 106390283; 106439544; 106446832; 106451933	GSBRNA2T00045519001; GSBRNA2T00137447001; GSBRNA2T00005567001; GSBRNA2T00124028001; GSBRNA2T00107610001; GSBRNA2T00153986001	LOC106346897; LOC106375222; LOC106375223; LOC106389228; LOC106390283; LOC106439544; LOC106446832; LOC106451933	A1; A9; C3; C1; A3; A5	Ribosome	1	0	2.67668e+07	2.85639e+07	2.65435e+07	2.35463e+07	2.79373e+07	2.83714e+07	High	High	High	High	High	High	1
High	Master Protein	Q96342	Myrosinase-binding protein (Fragment) OS=Brassica napus OX=3708 PE=2 SV=1	0	48.136	18	7	52	2	331	35.6	6.19	222	57.46	6	6				Pf01419						0	0	531559	480845	441924	891267	1.07096e+06	924581	High	High	High	High	High	High	1
High	Master Protein	A0A078IE36	BnaC05g18900D protein OS=Brassica napus OX=3708 GN=BnaC05g18900D PE=3 SV=1	0	48.118	13	6	31	3	544	59.2	8	125	45.61	6	6	metabolic process		catalytic activity	Pf00171		GSBRNA2T00087854001				0	2	3.13578e+06	3.39279e+06	2.64212e+06	2.52736e+06	2.98755e+06	3.16599e+06	High	High	High	High	High	High	1
High	Master Protein	Q43718	Acyl-[acyl-carrier-protein] hydrolase OS=Brassica napus OX=3708 GN=FatA PE=2 SV=1	0	47.939	31	8	21	8	366	42	7.17	108	23.95	8	5	metabolic process		catalytic activity	Pf01643	106436191; 106427991	GSBRNA2T00037963001	LOC106436191; LOC106427991	C4	Fatty acid biosynthesis	1	0	1.20469e+07	1.22363e+07	1.06805e+07	1.13535e+07	1.30579e+07	1.39987e+07	High	High	High	High	High	High	1
High	Master Protein	A0A078FEJ4	BnaA09g39830D protein OS=Brassica napus OX=3708 GN=BnaA09g39830D PE=4 SV=1	0	47.758	8	6	29	6	1197	129.5	6.09	120	36.48	6	6		membrane		Pf05738, Pf13620		GSBRNA2T00049482001				0	0	3.38171e+06	3.21972e+06	3.13493e+06	3.08052e+06	3.30284e+06	3.47889e+06	High	High	High	High	High	High	1
High	Master Protein	A0A078GBK2	Thioredoxin reductase OS=Brassica napus OX=3708 GN=BnaC04g02020D PE=3 SV=1	0	47.744	15	7	15	3	543	59.9	8.05	67	20.93	6	6	cellular homeostasis;metabolic process;regulation of biological process;response to stimulus	cytoplasm	antioxidant activity;catalytic activity	Pf00070, Pf00085, Pf07992, Pf13098		GSBRNA2T00024250001				0	4	3.51317e+06	3.53583e+06	3.11634e+06	3.38577e+06	4.00276e+06	4.41125e+06	High	High	High	High	High	High	1
High	Master Protein	A0A078JFX0	BnaC08g49000D protein OS=Brassica napus OX=3708 GN=BnaC08g49000D PE=3 SV=1	0	47.707	13	4	25	1	472	51.3	6.16	126	39.3	4	4	metabolic process		catalytic activity	Pf00295, Pf12708, Pf13229	106415822	GSBRNA2T00045683001	LOC106415822	C8		0	3	5.02361e+06	5.13349e+06	4.82832e+06	3.3948e+06	3.69699e+06	4.24402e+06	High	High	High	High	High	High	1
High	Master Protein	A0A078IRM7	Adenylosuccinate synthetase, chloroplastic OS=Brassica napus OX=3708 GN=BnaC04g55430D PE=3 SV=1	0	47.68	18	11	35	4	491	53.2	7.25	105	35.27	11	10	metabolic process	cytoplasm	catalytic activity;metal ion binding;nucleotide binding	Pf00709	106396855	GSBRNA2T00004899001	LOC106396855	C7	Metabolic pathways; Purine metabolism; Alanine, aspartate and glutamate metabolism	3	7	4.21209e+07	4.53803e+07	3.57228e+07	3.62775e+07	4.1181e+07	4.27674e+07	High	High	High	High	High	High	1
High	Master Protein	A0A078G7B9	Phosphotransferase OS=Brassica napus OX=3708 GN=BnaC06g01220D PE=3 SV=1	0	47.666	18	6	14	6	496	54.2	6.33	62	22.13	5	5	cellular homeostasis;metabolic process		catalytic activity;enzyme regulator activity;nucleotide binding	Pf00349, Pf03727		GSBRNA2T00013250001				0	0	6.3276e+06	6.43809e+06	5.19173e+06	5.54901e+06	6.27188e+06	6.86704e+06	High	High	High	High	High	High	1
High	Master Protein	A0A078HKQ0	NADH-cytochrome b5 reductase OS=Brassica napus OX=3708 GN=BnaA10g17010D PE=3 SV=1	0	47.618	36	7	15	2	281	31.3	7.84	73	25.03	7	6	metabolic process	membrane	catalytic activity	Pf00175, Pf00970	106387746	GSBRNA2T00065900001	LOC106387746	A7	Amino sugar and nucleotide sugar metabolism	1	5	9.2643e+06	9.65096e+06	7.75521e+06	8.99159e+06	9.52254e+06	1.11421e+07	High	High	High	High	High	High	1
High	Master Protein	A0A078F4F5	BnaA05g13430D protein OS=Brassica napus OX=3708 GN=BnaA05g13430D PE=4 SV=1	0	47.616	34	4	37	2	146	16.6	6.68	160	51.52	4	4				Pf00179	106411865	GSBRNA2T00125606001	LOC106411865	A5		0	4	7.20614e+06	6.81158e+06	5.24718e+06	6.07849e+06	7.12153e+06	7.46688e+06	High	High	High	High	High	High	1
High	Master Protein	A0A078FJC0	BnaA07g37750D protein OS=Brassica napus OX=3708 GN=BnaC06g14610D PE=3 SV=1	0	47.543	34	5	43	1	166	18	8.97	234	41.62	5	5	metabolic process	ribosome	structural molecule activity	Pf00298, Pf03946	106352830; 106433960; 106441066; 106452453	GSBRNA2T00019935001; GSBRNA2T00071279001; GSBRNA2T00007705001	LOC106352830; LOC106433960; LOC106441066; LOC106452453	A7; C6; C3	Ribosome	1	0	4.18855e+06	4.12377e+06	3.47463e+06	3.80111e+06	4.53184e+06	4.80858e+06	High	High	High	High	High	High	1
High	Master Protein	A0A078I868	Eukaryotic translation initiation factor 3 subunit B OS=Brassica napus OX=3708 GN=BnaA04g14660D PE=3 SV=1	0	47.521	11	5	20	1	714	82	5.27	95	29.92	5	5	cell organization and biogenesis;metabolic process;regulation of biological process	cytoplasm	protein binding;RNA binding	Pf00076, Pf04762, Pf08662		GSBRNA2T00082328001				0	0	751449	767517	626804	688549	749453	824937	High	High	High	High	High	High	1
High	Master Protein	A0A078HTG4	BnaC06g02150D protein OS=Brassica napus OX=3708 GN=BnaC06g02150D PE=4 SV=1	0	47.5	25	5	16	5	191	19.9	11.18	86	22.68	5	5	regulation of biological process	chromosome;nucleus	DNA binding			GSBRNA2T00071433001				0	0	641062	658792	620858	730979	825187	950170	High	High	High	High	High	High	1
High	Master Protein	A0A078JE46	BnaCnng45560D protein OS=Brassica napus OX=3708 GN=BnaCnng45560D PE=3 SV=1	0	47.474	26	9	32	9	381	41.2	5.41	120	28.29	9	5	metabolic process		catalytic activity	Pf00378, Pf13766		GSBRNA2T00043877001				0	0	2.90765e+07	3.0761e+07	2.60983e+07	2.56305e+07	2.93251e+07	3.143e+07	High	High	High	High	High	High	1
High	Master Protein	A0A078IIL3	Leucyl-tRNA synthetase OS=Brassica napus OX=3708 GN=BnaCnng19820D PE=3 SV=1	0	47.462	10	8	17	2	1055	119.3	6.09	80	26.57	8	7	metabolic process;regulation of biological process	cytoplasm	catalytic activity;nucleotide binding	Pf00133, Pf01406, Pf08264, Pf09334		GSBRNA2T00097723001				0	0	891719	900601	692982	806906	906068	983990	High	High	High	High	High	High	1
High	Master Protein	A0A078GHI2	BnaC05g33010D protein OS=Brassica napus OX=3708 GN=BnaC05g33010D PE=4 SV=1	0	47.402	12	6	33	4	408	46	5.99	119	46.15	6	6			catalytic activity;DNA binding;nucleotide binding	Pf00270, Pf00271, Pf04851		GSBRNA2T00026979001				0	0	4.08603e+06	4.35436e+06	3.63532e+06	3.89119e+06	4.6237e+06	4.73234e+06	High	High	High	High	High	High	1
High	Master Protein	Q39336	Guanine nucleotide-binding protein subunit beta-like protein OS=Brassica napus OX=3708 GN=GB1 PE=2 SV=1	0	47.325	9	2	23	1	327	35.7	7.9	157	48.69	2	2		ribosome	protein binding	Pf00400						0	0	5.64526e+06	5.77248e+06	4122064	4.17595e+06	5.13133e+06	5672515	High	High	High	High	High	High	1
High	Master Protein	A0A078FXS5	Serine/threonine-protein phosphatase OS=Brassica napus OX=3708 GN=BnaC03g30360D PE=3 SV=1	0	47.246	11	8	27	7	886	96.8	6.48	93	31.99	8	7	metabolic process;regulation of biological process;response to stimulus		catalytic activity;protein binding	Pf00149, Pf13415, Pf13418		GSBRNA2T00002332001				0	1	3.55235e+06	3.83561e+06	3.16856e+06	3.25168e+06	3.80232e+06	3.93905e+06	High	High	High	High	High	High	1
High	Master Protein	A0A078I9U2	Elongation factor G, chloroplastic OS=Brassica napus OX=3708 GN=BnaA09g12770D PE=3 SV=1	0	47.241	9	4	12	1	775	85.2	5.92	85	27.94	4	4	metabolic process		catalytic activity;nucleotide binding;RNA binding	Pf00009, Pf00679, Pf01926, Pf03144, Pf03764, Pf14492		GSBRNA2T00086390001				0	0	914089	961741	817783	949620	986268	1.04683e+06	High	High	High	High	High	High	1
High	Master Protein	A0A078I0Y5	BnaC05g48370D protein OS=Brassica napus OX=3708 GN=BnaC05g48370D PE=3 SV=1	0	47.196	3	13	25	13	5076	563.5	5.96	68	23.25	13	11			metal ion binding;protein binding	Pf00569, Pf02207, Pf13764		GSBRNA2T00076274001				0	0	9.01378e+06	9.12648e+06	7.87913e+06	8.27748e+06	9.51238e+06	1.09585e+07	High	High	High	High	High	High	1
High	Master Protein	A0A078G858	BnaC09g47360D protein OS=Brassica napus OX=3708 GN=BnaC09g47360D PE=3 SV=1	0	47.184	18	5	22	5	336	38.3	5.72	108	35.8	5	5	metabolic process		catalytic activity;metal ion binding	Pf03171, Pf14226		GSBRNA2T00016009001				0	0	1.17148e+07	1.15493e+07	9.80031e+06	1.112e+07	1.29449e+07	1.3487e+07	High	High	High	High	High	High	1
High	Master Protein	A0A078J8M1	Tryptophanyl-tRNA synthetase OS=Brassica napus OX=3708 GN=BnaC03g73230D PE=3 SV=1	0	47.144	17	6	18	6	408	46.1	6.48	84	23.53	6	6	metabolic process	cytoplasm	catalytic activity;nucleotide binding	Pf00579		GSBRNA2T00039151001				0	0	6.5335e+06	7.13284e+06	5.14009e+06	5.729e+06	6.66029e+06	7.30868e+06	High	High	High	High	High	High	1
High	Master Protein	G3DR86	Carotenoid cleavage dioxygenase OS=Brassica napus OX=3708 GN=CDD1 PE=2 SV=1	0	47.123	17	8	16	8	534	60.3	6.04	70	18.57	8	5	metabolic process		catalytic activity;metal ion binding	Pf03055	106444914; 106444915		LOC106444914; LOC106444915	A4		0	0	9.74556e+06	1.02486e+07	8.63748e+06	9.08772e+06	9.79987e+06	1.05287e+07	High	High	High	High	High	High	1
High	Master Protein	A0A078INM4	Isopentenyl-diphosphate Delta-isomerase OS=Brassica napus OX=3708 GN=BnaA05g33360D PE=3 SV=1	0	47.095	19	5	25	1	284	32.4	6.46	118	35.04	5	5	metabolic process		catalytic activity	Pf00293	106453216	GSBRNA2T00003640001	LOC106453216	A5	Terpenoid backbone biosynthesis; Metabolic pathways; Biosynthesis of secondary metabolites	3	4	2.02693e+07	2.16422e+07	1.69651e+07	1.84989e+07	2.19043e+07	2.33704e+07	High	High	High	High	High	High	1
High	Master Protein	A0A078HVR6	BnaA08g03260D protein OS=Brassica napus OX=3708 GN=BnaA08g03260D PE=3 SV=1	0	47.087	9	8	26	3	1044	115.8	9.31	99	40	8	8	regulation of biological process		protein binding	Pf02170, Pf02171, Pf08699, Pf12764		GSBRNA2T00073753001				0	0	1198935	1.23049e+06	1.0504e+06	1.12268e+06	1.31142e+06	1391717	High	High	High	High	High	High	1
High	Master Protein	A0A078GI82	Sinigrinase OS=Brassica napus OX=3708 GN=BnaC02g40090D PE=3 SV=1	0	46.962	24	4	27	1	203	23.6	7.49	136	34.65	4	4	metabolic process		catalytic activity	Pf00232		GSBRNA2T00028813001				0	0	2.26849e+06	2.27863e+06	1.8746e+06	2.07257e+06	2.22296e+06	2.47315e+06	High	High	High	High	High	High	1
High	Master Protein	A0A078FRU6	BnaA08g28880D protein OS=Brassica napus OX=3708 GN=BnaA08g28880D PE=4 SV=1	0	46.941	30	7	22	1	224	25.2	4.86	85	26.8	7	7	transport			Pf00638		GSBRNA2T00089789001				0	0	664801	693974	569463	679288	772557	807820	High	High	High	High	High	High	1
High	Master Protein	E1VD28	Coniferaldehyde/sinapaldehyde dehydrogenase OS=Brassica napus OX=3708 GN=REF1_II PE=3 SV=1	0	46.898	15	8	25	1	501	54.2	6.48	79	32.43	8	8	metabolic process		catalytic activity	Pf00171	106361783; 106361781; 106361782	GSBRNA2T00154907001	LOC106361783; LOC106361781; LOC106361782	A3	Phenylpropanoid biosynthesis	1	0	243579	242057	185900	203532	244308	247219	High	High	High	High	High	High	1
High	Master Protein	A0A078FSB3	3-oxoacyl-[acyl-carrier-protein] reductase OS=Brassica napus OX=3708 GN=BnaA07g09030D PE=3 SV=1	0	46.7	24	7	34	2	321	33.8	8.79	113	38.18	7	6	metabolic process		catalytic activity;nucleotide binding	Pf00106, Pf08659, Pf13561		GSBRNA2T00089961001				0	2	2.22394e+07	2.07427e+07	1.91628e+07	1.9321e+07	2.40434e+07	2.41786e+07	High	High	High	High	High	High	1
High	Master Protein	Q43124	Proliferating cell nuclear antigen OS=Brassica napus OX=3708 PE=2 SV=1	0	46.663	28	6	25	3	263	29.1	4.77	99	32.3	6	6	metabolic process;regulation of biological process	nucleus	DNA binding;enzyme regulator activity	Pf00705, Pf02747	106420145	GSBRNA2T00122168001; GSBRNA2T00031690001	LOC106420145	C8	Mismatch repair; DNA replication; Base excision repair; Nucleotide excision repair	4	4	1.30417e+07	1.39019e+07	1.04381e+07	1.191e+07	1.28829e+07	1.52171e+07	High	High	High	High	High	High	1
High	Master Protein	A0A078GXC5	BnaC01g19300D protein OS=Brassica napus OX=3708 GN=BnaC01g19300D PE=3 SV=1	0	46.537	31	5	82	2	172	19.4	6.86	291	110.43	5	5				Pf00234		GSBRNA2T00042217001				0	0	4.07227e+06	4.217e+06	4.15512e+06	4.92412e+06	5.8452e+06	6.42015e+06	High	High	High	High	High	High	1
High	Master Protein	A0A078FZR3	BnaC05g02700D protein OS=Brassica napus OX=3708 GN=BnaC05g02700D PE=3 SV=1	0	46.522	5	7	27	7	1338	147.1	6.35	100	38.68	7	7	metabolic process		catalytic activity;metal ion binding;nucleotide binding	Pf00111, Pf00941, Pf01315, Pf01799, Pf02738, Pf03450	106402186	GSBRNA2T00002777001	LOC106402186	C5	Biosynthesis of secondary metabolites; Carotenoid biosynthesis; Metabolic pathways	3	0	1.1053e+07	1.16491e+07	9.85937e+06	1.1445e+07	1.33461e+07	1.47889e+07	High	High	High	High	High	High	1
High	Master Protein	A0A078FS66	Beta-galactosidase OS=Brassica napus OX=3708 GN=BnaC04g15750D PE=3 SV=1	0	46.512	11	6	21	6	844	92	8.27	95	28.26	6	6	metabolic process		catalytic activity	Pf01301, Pf02140, Pf02449		GSBRNA2T00089988001				0	0	2.91858e+06	3.24902e+06	2.80763e+06	2.8359e+06	3.34819e+06	3.39954e+06	High	High	High	High	High	High	1
High	Master Protein	A0A078ILE6	Citrate synthase OS=Brassica napus OX=3708 GN=BnaC04g52580D PE=3 SV=1	0	46.428	15	7	31	3	510	56.2	7.4	127	43.65	7	6	metabolic process		catalytic activity	Pf00285	106361772	GSBRNA2T00097545001	LOC106361772	C4		0	4	2.21127e+07	2.00589e+07	1.61966e+07	1.67915e+07	2.07307e+07	2.33164e+07	High	High	High	High	High	High	1
High	Master Protein	A0A078IPH5	BnaA03g56040D protein OS=Brassica napus OX=3708 GN=BnaA03g56040D PE=3 SV=1	0	46.42	22	4	20	3	253	26.8	8.16	77	30.64	4	4	metabolic process;regulation of biological process	cytoplasm	metal ion binding;nucleotide binding	Pf00166		GSBRNA2T00004316001				0	1	2.74075e+06	2.84001e+06	2.22292e+06	2.54299e+06	3.44212e+06	3.34149e+06	High	High	High	High	High	High	1
High	Master Protein	A0A078HXL2	BnaA08g20850D protein OS=Brassica napus OX=3708 GN=BnaA08g20850D PE=3 SV=1	0	46.363	34	6	34	4	259	29.1	4.75	116	44.94	5	6			protein binding	Pf00244	106434236; 106434237	GSBRNA2T00073092001	LOC106434236; LOC106434237			0	0	2.49755e+06	2.59208e+06	2.11141e+06	2.0598e+06	2.43562e+06	2.48672e+06	High	High	High	High	High	High	1
High	Master Protein	A0A078FSJ5	Glucose-1-phosphate adenylyltransferase OS=Brassica napus OX=3708 GN=BnaA04g12270D PE=3 SV=1	0	46.344	14	6	34	4	520	57.8	7.37	122	45.24	6	6	metabolic process		catalytic activity;nucleotide binding	Pf00483		GSBRNA2T00090244001				0	0	4.13569e+06	4.3369e+06	3.77645e+06	3.74926e+06	4.23692e+06	4.26555e+06	High	High	High	High	High	High	1
High	Master Protein	A0A078IH07	BnaA03g50940D protein OS=Brassica napus OX=3708 GN=BnaA03g50940D PE=3 SV=1	0	46.309	17	4	27	4	259	28.5	6.54	110	38.24	4	4	metabolic process		catalytic activity	Pf04199	106393997; 106441136	GSBRNA2T00092696001	LOC106393997; LOC106441136	A3		0	0	1.59231e+07	1.72642e+07	1.31606e+07	1.44854e+07	1.70972e+07	1.75282e+07	High	High	High	High	High	High	1
High	Master Protein	A0A078H3L3	Tubulin beta chain OS=Brassica napus OX=3708 GN=BnaC03g63960D PE=3 SV=1	0	46.26	20	7	38	1	446	50	4.78	97	48.48	6	5	cell organization and biogenesis	cytoplasm;cytoskeleton	catalytic activity;nucleotide binding;structural molecule activity	Pf00091, Pf03953, Pf10644		GSBRNA2T00047657001				0	0	317789	332080	287466	298972	444086	366489	High	High	High	High	High	High	1
High	Master Protein	A0A078GR90	Isoleucyl-tRNA synthetase OS=Brassica napus OX=3708 GN=BnaUnng00270D PE=3 SV=1	0	46.244	9	9	26	8	1175	134	6.38	94	34.3	8	9	metabolic process;regulation of biological process	cytoplasm	catalytic activity;nucleotide binding;RNA binding	Pf00133, Pf08264, Pf09334		GSBRNA2T00038454001				0	1	1.11065e+07	1.09197e+07	9.52446e+06	1.04303e+07	1.18995e+07	1.26955e+07	High	High	High	High	High	High	1
High	Master Protein	A0A078IQ70	Sinigrinase OS=Brassica napus OX=3708 GN=BnaA08g31350D PE=3 SV=1	0	46.223	15	8	53	7	531	60.9	8.65	178	38.61	8	6	metabolic process		catalytic activity	Pf00232		GSBRNA2T00004725001				0	0	2.77593e+07	3.04509e+07	3.13695e+07	3.39613e+07	3.17763e+07	3.2682e+07	High	High	High	High	High	High	1
High	Master Protein	A0A078HMC1	BnaA07g28280D protein OS=Brassica napus OX=3708 GN=BnaA07g28280D PE=3 SV=1	0	46.173	21	6	44	2	220	24.8	10.58	144	41.67	6	6	metabolic process	ribosome	structural molecule activity	Pf00252	106406321; 106432562	GSBRNA2T00066548001	LOC106406321; LOC106432562	C6; A7	Ribosome	1	5	2.32262e+07	2.87454e+07	2.42375e+07	2.70438e+07	2.99816e+07	3.42167e+07	High	High	High	High	High	High	1
High	Master Protein	A0A078GX05	BnaAnng03490D protein OS=Brassica napus OX=3708 GN=BnaAnng03490D PE=4 SV=1	0	45.857	12	5	14	2	534	60.1	8	78	24.54	5	5	metabolic process		catalytic activity	Pf00355, Pf08417		GSBRNA2T00043538001				0	4	2.69685e+06	2.84161e+06	2.49937e+06	2.54985e+06	2.77613e+06	3.19472e+06	High	High	High	High	High	High	1
High	Master Protein	Q43744	Malate dehydrogenase, mitochondrial OS=Brassica napus OX=3708 GN=MDH PE=2 SV=1	0	45.829	14	4	35	1	341	35.7	8.68	160	35.11	4	3	metabolic process	mitochondrion;organelle lumen	catalytic activity	Pf00056, Pf01073, Pf02866	106360426		LOC106360426	A8	Carbon metabolism; Cysteine and methionine metabolism; Carbon fixation in photosynthetic organisms; Citrate cycle (TCA cycle); Pyruvate metabolism; Biosynthesis of secondary metabolites; Metabolic pathways; Glyoxylate and dicarboxylate metabolism	8	0	7.93342e+06	7.99181e+06	6538323	6.72432e+06	8012189	8.49645e+06	High	High	High	High	High	High	1
High	Master Protein	A0A078F3D4	60S acidic ribosomal protein P0 OS=Brassica napus OX=3708 GN=BnaC03g36170D PE=3 SV=1	0	45.815	13	4	31	4	323	34.3	5.15	142	36.28	4	3		ribosome		Pf00428, Pf00466		GSBRNA2T00125104001				0	0	6.87659e+07	7.62367e+07	7.18257e+07	6.70576e+07	8.02921e+07	8.90776e+07	High	High	High	High	High	High	1
High	Master Protein	A0A078H0V5	ATP citrate synthase OS=Brassica napus OX=3708 GN=BnaA08g26420D PE=3 SV=1	0	45.772	24	7	27	6	424	46.8	5.4	107	40.42	7	7			catalytic activity;nucleotide binding	Pf08442	106362359	GSBRNA2T00047173001	LOC106362359	A8	Metabolic pathways; Biosynthesis of secondary metabolites; Citrate cycle (TCA cycle)	3	0	2.83252e+06	2.92587e+06	2.48216e+06	2.79427e+06	3.02258e+06	3.22174e+06	High	High	High	High	High	High	1
High	Master Protein	A0A078GHD7	BnaA05g14760D protein OS=Brassica napus OX=3708 GN=BnaA05g14760D PE=3 SV=1	0	45.737	11	9	25	3	1010	112.7	9.47	85	30.62	9	8	regulation of biological process		protein binding	Pf02170, Pf02171, Pf08699		GSBRNA2T00033337001				0	6	4.06817e+06	4.10733e+06	3.46238e+06	3.6528e+06	4.64843e+06	4.43537e+06	High	High	High	High	High	High	1
High	Master Protein	A0A078FEM0	Glucose-6-phosphate 1-dehydrogenase OS=Brassica napus OX=3708 GN=BnaC06g13190D PE=3 SV=1	0	45.511	21	11	42	8	532	60.8	6.25	130	40.56	11	9	metabolic process		catalytic activity;nucleotide binding	Pf00479, Pf02781		GSBRNA2T00049904001				0	3	2.1245e+07	2.03154e+07	1.71806e+07	2.11483e+07	2.37786e+07	2.6497e+07	High	High	High	High	High	High	1
High	Master Protein	A0A078J090	Dolichyl-diphosphooligosaccharide--protein glycosyltransferase subunit 2 OS=Brassica napus OX=3708 GN=BnaA03g58520D PE=3 SV=1	0	45.493	7	4	35	4	698	75.1	7.06	151	39.94	4	4	metabolic process	membrane		Pf05817		GSBRNA2T00023648001				0	0	1.14528e+07	1.15589e+07	9.90969e+06	1.02718e+07	1.1569e+07	1.26992e+07	High	High	High	High	High	High	1
High	Master Protein	A0A078HM31	BnaA10g17340D protein OS=Brassica napus OX=3708 GN=BnaA10g17340D PE=3 SV=1	0	45.469	13	6	21	2	573	61.2	6.16	114	34.36	6	5	metabolic process		catalytic activity;metal ion binding	Pf00205, Pf02552, Pf02775, Pf02776		GSBRNA2T00065860001				0	4	5.65555e+06	6.10905e+06	4.89131e+06	7.48261e+06	8.16231e+06	8.37035e+06	High	High	High	High	High	High	1
High	Master Protein	A5GZU5	Cinnamate 4-hydroxylase isoform 1 OS=Brassica napus OX=3708 GN=C4H PE=2 SV=1	0	45.443	12	6	22	2	505	57.7	9.06	85	23.02	6	6	metabolic process		catalytic activity;metal ion binding	Pf00067	106446415	GSBRNA2T00113432001	LOC106446415		Metabolic pathways; Phenylpropanoid biosynthesis; Ubiquinone and other terpenoid-quinone biosynthesis; Stilbenoid, diarylheptanoid and gingerol biosynthesis; Flavonoid biosynthesis; Biosynthesis of secondary metabolites; Phenylalanine metabolism	7	0	677673	708260	606154	671781	732891	806962	High	High	High	High	High	High	1
High	Master Protein	A0A078H8B6	BnaC03g27790D protein OS=Brassica napus OX=3708 GN=BnaC03g27790D PE=3 SV=1	0	45.402	13	6	36	6	478	52.5	6.6	145	47.96	6	6	metabolic process		catalytic activity;metal ion binding	Pf02127, Pf05343		GSBRNA2T00055905001				0	0	1.44599e+07	1.47872e+07	1.2351e+07	1.38381e+07	1.44737e+07	1.67432e+07	High	High	High	High	High	High	1
High	Master Protein	A0A078CJJ5	BnaC04g27310D protein OS=Brassica napus OX=3708 GN=BnaC04g27310D PE=3 SV=1	0	45.34	34	5	29	1	166	18	8.97	112	36.33	5	5	metabolic process	ribosome	structural molecule activity	Pf00298, Pf03946	106371444	GSBRNA2T00126533001; GSBRNA2T00046365001	LOC106371444	C4	Ribosome	1	4	1.13533e+07	1.26731e+07	1.02641e+07	9.7555e+06	1.22793e+07	1.19014e+07	High	High	High	High	High	High	1
High	Master Protein	A0A078IH14	D-3-phosphoglycerate dehydrogenase OS=Brassica napus OX=3708 GN=BnaA03g50990D PE=3 SV=1	0	45.327	15	8	27	4	598	62.7	6.68	101	30.95	8	7	metabolic process		catalytic activity;nucleotide binding	Pf00389, Pf00670, Pf01842, Pf02826, Pf05221, Pf13478	106393967; 106441132	GSBRNA2T00092701001	LOC106393967; LOC106441132	A3	Biosynthesis of amino acids; Glycine, serine and threonine metabolism; Carbon metabolism; Metabolic pathways	4	4	2.366e+07	2.39291e+07	1.89901e+07	2.06868e+07	2.39361e+07	2.52676e+07	High	High	High	High	High	High	1
High	Master Protein	A0A078HU21	Methionine aminopeptidase 2 OS=Brassica napus OX=3708 GN=BnaA09g38240D PE=3 SV=1	0	45.285	17	7	22	7	440	49.1	6.28	84	32.02	7	7	metabolic process	cytoplasm	catalytic activity;metal ion binding	Pf00557	106368418	GSBRNA2T00072600001	LOC106368418	A9		0	0	5.96202e+06	6.27416e+06	4.89692e+06	5.47241e+06	6.07913e+06	6.68562e+06	High	High	High	High	High	High	1
High	Master Protein	A0A078G3T3	Arogenate dehydratase OS=Brassica napus OX=3708 GN=BnaC05g08770D PE=3 SV=1	0	45.268	10	5	22	4	724	80.6	7.55	92	31.28	3	5	metabolic process		catalytic activity;metal ion binding	Pf00800, Pf00903, Pf01842, Pf12681, Pf13669		GSBRNA2T00008904001				0	1	3.51277e+06	3.98071e+06	3.3556e+06	3.91109e+06	4.38543e+06	4.67885e+06	High	High	High	High	High	High	1
High	Master Protein	A0A078J638	Photosystem II stability/assembly factor OS=Brassica napus OX=3708 GN=BnaC07g49760D PE=3 SV=1	0	45.237	13	4	28	4	401	43.7	7.33	145	41.18	4	4			protein binding	Pf14870	106377287	GSBRNA2T00034575001	LOC106377287	C3		0	0	2.51688e+06	2.58972e+06	2.15953e+06	2.33494e+06	2.99194e+06	2.77111e+06	High	High	High	High	High	High	1
High	Master Protein	A0A078G360	Dihydrolipoyl dehydrogenase OS=Brassica napus OX=3708 GN=BnaC06g01550D PE=3 SV=1	0	45.225	17	6	19	6	507	53.9	7.27	82	27.1	6	5	cellular homeostasis;metabolic process;regulation of biological process		catalytic activity;nucleotide binding	Pf00070, Pf01134, Pf02852, Pf07992, Pf12831		GSBRNA2T00013308001				0	0	2.14294e+07	2.603e+07	1.95053e+07	2.21559e+07	2.76842e+07	3.11179e+07	High	High	High	High	High	High	1
High	Master Protein	A0A078JQC0	Glucose-1-phosphate adenylyltransferase OS=Brassica napus OX=3708 GN=BnaCnng59960D PE=3 SV=1	0	45.165	15	5	23	2	511	56.1	6.74	108	39.46	5	5	metabolic process		catalytic activity;nucleotide binding	Pf00483, Pf12804	106348979	GSBRNA2T00076549001	LOC106348979	C7	Biosynthesis of secondary metabolites; Starch and sucrose metabolism; Metabolic pathways; Amino sugar and nucleotide sugar metabolism	4	0	1.97271e+06	2.06353e+06	1.67119e+06	1.96219e+06	2.12994e+06	2.34556e+06	High	High	High	High	High	High	1
High	Master Protein	A0A078GR11	BnaA02g25010D protein OS=Brassica napus OX=3708 GN=BnaA02g25010D PE=4 SV=1	0	45.138	15	6	24	1	394	43.4	8.47	101	41.02	6	6	metabolic process		catalytic activity;metal ion binding	Pf00174, Pf03404		GSBRNA2T00041690001				0	0	97946.9	100528	94172.4	86486.7	79190.9	81713.8	High	High	High	High	High	High	1
High	Master Protein	A0A078G2H1	BnaC04g04870D protein OS=Brassica napus OX=3708 GN=BnaC04g04870D PE=3 SV=1	0	45.091	14	6	31	3	342	38.6	5.12	109	39.16	6	6	metabolic process		RNA binding	Pf00575, Pf07541		GSBRNA2T00006045001				0	3	1.53387e+07	1.54904e+07	1.281e+07	1.36487e+07	1.60557e+07	1.76522e+07	High	High	High	High	High	High	1
High	Master Protein	P93657	L-ascorbate peroxidase OS=Brassica napus OX=3708 GN=APX PE=2 SV=1	0	45.073	26	6	55	3	250	27.6	6.07	170	64.36	6	6	metabolic process;response to stimulus		antioxidant activity;catalytic activity	Pf00141						0	3	5.47914e+07	5.52631e+07	4.42712e+07	4.94459e+07	5.55015e+07	6.23946e+07	High	High	High	High	High	High	1
High	Master Protein	A0A078HCY2	BnaA04g15330D protein OS=Brassica napus OX=3708 GN=BnaA04g15330D PE=3 SV=1	0	44.981	11	7	19	3	715	76.8	8.62	82	30.75	7	7	metabolic process	membrane	catalytic activity;nucleotide binding	Pf00004, Pf01434		GSBRNA2T00058280001				0	4	4.95959e+06	5.21283e+06	4.29123e+06	4.49888e+06	5.49342e+06	5.59315e+06	High	High	High	High	High	High	1
High	Master Protein	Q6R1M8	Putative proteasome 20S beta1.1 subunit (Fragment) OS=Brassica napus OX=3708 PE=2 SV=1	0	44.947	29	5	33	5	172	18.6	8.1	134	42.48	5	5	metabolic process	proteasome	catalytic activity	Pf00227	106390042		LOC106390042	C3		0	0	8.85075e+06	9.50995e+06	7.59141e+06	8.02511e+06	9.17806e+06	1.00503e+07	High	High	High	High	High	High	1
High	Master Protein	A0A078FRC0	BnaA07g08470D protein OS=Brassica napus OX=3708 GN=BnaA07g08470D PE=4 SV=1	0	44.866	13	8	19	8	755	85.2	6.21	82	25.88	8	8	metabolic process		catalytic activity;nucleotide binding	Pf00579		GSBRNA2T00089889001				0	0	9.62758e+06	9.11073e+06	8.15929e+06	9.05771e+06	1.0933e+07	1.17447e+07	High	High	High	High	High	High	1
High	Master Protein	A0A078F495	Protein disulfide-isomerase OS=Brassica napus OX=3708 GN=BnaA06g15500D PE=3 SV=1	0	44.82	16	8	60	4	498	55.5	5.35	186	69.4	8	7	cellular homeostasis;regulation of biological process	endoplasmic reticulum	catalytic activity	Pf00085, Pf13098, Pf13848, Pf13899, Pf13905		GSBRNA2T00125477001				0	0	2.39511e+07	2.48347e+07	2.03505e+07	2.05985e+07	2.39251e+07	2.47603e+07	High	High	High	High	High	High	1
High	Master Protein	A0A078FZ46	BnaC07g04280D protein OS=Brassica napus OX=3708 GN=BnaC07g04280D PE=3 SV=1	0	44.784	7	4	16	1	737	78.4	7.71	78	20.25	4	3	metabolic process		catalytic activity	Pf00082, Pf02225, Pf05922		GSBRNA2T00002480001				0	0	726885	789475	638975	642051	1.08468e+06	780631	High	High	High	High	High	High	1
High	Master Protein	A0A078G853	Pyruvate kinase OS=Brassica napus OX=3708 GN=BnaC09g47410D PE=3 SV=1	0	44.778	12	6	36	1	510	54.9	6.13	131	36.7	6	5	metabolic process		catalytic activity;metal ion binding	Pf00224, Pf02887		GSBRNA2T00016004001				0	0	114061	121722	79394.2	102487	267096	113766	High	High	High	High	High	High	1
High	Master Protein	A0A078JWG1	Glutathione reductase OS=Brassica napus OX=3708 GN=BnaAnng31940D PE=3 SV=1	0	44.772	14	8	15	8	562	60.5	7.94	61	22.13	7	6	cellular homeostasis;metabolic process;regulation of biological process		antioxidant activity;catalytic activity;nucleotide binding	Pf00070, Pf02852, Pf07992, Pf13434		GSBRNA2T00093382001				0	0	6.05647e+06	6.95192e+06	5.59636e+06	5.38587e+06	6.297e+06	6.79361e+06	High	High	High	High	High	High	1
High	Master Protein	A0A078J890	BnaC06g40890D protein OS=Brassica napus OX=3708 GN=BnaC06g40890D PE=4 SV=1	0	44.633	15	9	25	7	511	54.7	5.21	84	30.09	9	8			RNA binding	Pf00076, Pf13893, Pf14259		GSBRNA2T00027871001				0	2	1.48539e+07	1.55644e+07	1.30202e+07	1.2352e+07	1.56268e+07	1.65585e+07	High	High	High	High	High	High	1
High	Master Protein	Q84TK5	Glutamate-1-semialdehyde 2,1-aminomutase OS=Brassica napus OX=3708 GN=Gsa PE=2 SV=1	0	44.619	16	7	31	7	473	50.3	6.65	142	29.47	7	4	metabolic process		catalytic activity	Pf00202	106366203	GSBRNA2T00094580001	LOC106366203	A9	Porphyrin and chlorophyll metabolism; Metabolic pathways; Biosynthesis of secondary metabolites	3	0	2.45903e+07	2.50153e+07	2.0471e+07	2.03059e+07	2.45165e+07	2.6377e+07	High	High	High	High	High	High	1
High	Master Protein	A0A078FVA0	BnaC09g41110D protein OS=Brassica napus OX=3708 GN=BnaC09g41110D PE=4 SV=1	0	44.588	11	8	20	7	816	92.1	5	77	24.03	8	8					106387690	GSBRNA2T00094919001	LOC106387690	C9		0	1	8.85027e+06	9.49878e+06	7.95381e+06	7.93513e+06	9.1269e+06	9.80563e+06	High	High	High	High	High	High	1
High	Master Protein	A0A078FU03	Glutaredoxin-dependent peroxiredoxin OS=Brassica napus OX=3708 GN=BnaA02g12330D PE=3 SV=1	0	44.512	31	3	32	3	162	17.4	5.35	166	64.94	3	3	cellular homeostasis;metabolic process;regulation of biological process		antioxidant activity;catalytic activity	Pf00578, Pf08534	106381333	GSBRNA2T00090984001	LOC106381333	A2		0	0	1.92742e+07	2.01513e+07	1.54254e+07	1.76649e+07	2.22312e+07	2.262e+07	High	High	High	High	High	High	1
High	Master Protein	A0A078HBJ4	BnaA09g47750D protein OS=Brassica napus OX=3708 GN=BnaA09g47750D PE=3 SV=1	0	44.502	6	7	18	3	1380	154.6	5.99	70	23.99	7	7	metabolic process		catalytic activity;nucleotide binding	Pf01326		GSBRNA2T00057410001				0	4	3.88525e+06	3.99877e+06	3.10868e+06	3.43807e+06	4.01374e+06	4.12466e+06	High	High	High	High	High	High	1
High	Master Protein	A0A078JJQ6	Trehalase (Fragment) OS=Brassica napus OX=3708 GN=BnaA01g35070D PE=3 SV=1	0	44.494	11	5	19	5	566	64.4	6.24	88	36.24	5	5	metabolic process	membrane	catalytic activity	Pf01204		GSBRNA2T00055555001				0	0	6.59345e+06	6.9629e+06	5.23726e+06	5.24343e+06	5.58566e+06	6.56412e+06	High	High	High	High	High	High	1
High	Master Protein	A0A078FAC5	BnaC08g44690D protein OS=Brassica napus OX=3708 GN=BnaC08g44690D PE=3 SV=1	0	44.479	10	7	22	1	989	110.7	5.11	89	26.92	7	6			catalytic activity;nucleotide binding	Pf00009, Pf00679, Pf03144, Pf03764, Pf14492		GSBRNA2T00031758001				0	0	1.24151e+06	1.36116e+06	1121286	1172041	1.28924e+06	1.42543e+06	High	High	High	High	High	High	1
High	Master Protein	A0A078H4I7	Asparagine--tRNA ligase OS=Brassica napus OX=3708 GN=BnaA10g10830D PE=3 SV=1	0	44.458	15	9	25	1	575	63.5	5.31	87	38.4	8	8	metabolic process	cytoplasm	catalytic activity;nucleotide binding	Pf00152, Pf01336	106371467	GSBRNA2T00052825001	LOC106371467	A10	Aminoacyl-tRNA biosynthesis	1	8	1.66877e+07	1.78643e+07	1.30412e+07	1.42134e+07	1.56845e+07	1.78544e+07	High	High	High	High	High	High	1
High	Master Protein	A0A078FFG2	BnaC03g14320D protein OS=Brassica napus OX=3708 GN=BnaC03g14320D PE=3 SV=1	0	44.447	14	7	25	2	644	72	5.14	96	33.56	7	7	cell organization and biogenesis		protein binding	Pf03999		GSBRNA2T00060861001				0	5	1.37015e+07	1.4213e+07	1.24972e+07	1.18171e+07	1.42552e+07	1.50058e+07	High	High	High	High	High	High	1
High	Master Protein	A0A078G4P6	BnaA09g03140D protein OS=Brassica napus OX=3708 GN=BnaA09g03140D PE=3 SV=1	0	44.444	38	3	15	3	140	15.1	4.88	93	27.36	3	3			metal ion binding	Pf00173	106363980	GSBRNA2T00009741001	LOC106363980	A9		0	0	3.60695e+06	3.78664e+06	3.66959e+06	3.55663e+06	3.88164e+06	4.18997e+06	High	High	High	High	High	High	1
High	Master Protein	A0A078IAU6	BnaA10g03690D protein OS=Brassica napus OX=3708 GN=BnaA10g03690D PE=3 SV=1	0	44.42	30	6	32	5	241	27.2	6.21	113	36.21	6	5				Pf06884	106371182	GSBRNA2T00087085001	LOC106371182; BNAA10G03690D	A10		0	1	1.13877e+07	1.42669e+07	1.34142e+07	1.90773e+07	1.82751e+07	1.71922e+07	High	High	High	High	High	High	1
High	Master Protein	A0A078JRD8	BnaCnng57230D protein OS=Brassica napus OX=3708 GN=BnaCnng57230D PE=4 SV=1	0	44.417	16	6	22	6	446	49.5	5.68	94	34.54	6	6				Pf13360		GSBRNA2T00068390001				0	0	4.35942e+06	5.0467e+06	4.82988e+06	5.03252e+06	4.75817e+06	5.80171e+06	High	High	High	High	High	High	1
High	Master Protein	A0A078FA89	BnaC03g54740D protein OS=Brassica napus OX=3708 GN=BnaC03g54740D PE=4 SV=1	0	44.416	12	7	23	7	622	70	6.47	83	27.93	7	7	metabolic process		catalytic activity;protein binding	Pf00160	106396902	GSBRNA2T00000629001	LOC106396902	C4		0	0	3.10213e+06	2.99463e+06	2.4279e+06	2.88446e+06	3.39528e+06	3.57507e+06	High	High	High	High	High	High	1
High	Master Protein	Q93X65	Enoyl-[acyl-carrier protein] reductase OS=Brassica napus OX=3708 GN=enrA2 PE=2 SV=1	0	44.382	14	5	29	3	386	40.9	9.25	128	46.2	5	5	metabolic process		catalytic activity	Pf13561	106357744		LOC106357744	A7	Fatty acid metabolism; Metabolic pathways; Fatty acid biosynthesis; Biotin metabolism	4	0	2.93417e+06	3.11991e+06	2.56745e+06	2.5752e+06	3.1864e+06	3.0344e+06	High	High	High	High	High	High	1
High	Master Protein	A0A078IJI1	BnaCnng18640D protein OS=Brassica napus OX=3708 GN=BnaCnng18640D PE=4 SV=1	0	44.329	18	7	23	7	475	51	6.19	101	27.99	6	6				Pf12708	106365935	GSBRNA2T00095819001	LOC106365935	C1		0	0	1.34761e+07	1.44036e+07	1.08864e+07	1.14266e+07	1.39832e+07	1.56666e+07	High	High	High	High	High	High	1
High	Master Protein	A0A078JWC6	Beta-amylase OS=Brassica napus OX=3708 GN=BnaCnng71190D PE=3 SV=1	0	44.252	51	5	16	1	165	18.6	5.57	90	29.29	5	4	metabolic process		catalytic activity	Pf01373		GSBRNA2T00010967001				0	0	406421	531189	405155	496023	490392	508177	High	High	High	High	High	High	1
High	Master Protein	A0A078IMG6	BnaA01g30830D protein OS=Brassica napus OX=3708 GN=BnaA01g30830D PE=4 SV=1	0	44.251	13	3	22	2	325	36	8.87	151	22.98	3	2			protein binding	Pf08263, Pf13855	106351771	GSBRNA2T00097000001	LOC106351771	A1		0	1	9.17819e+06	1.00665e+07	7.8229e+06	7.8204e+06	9.496e+06	9.85057e+06	High	High	High	High	High	High	1
High	Master Protein	A0A078J1W2	Proteasome subunit beta OS=Brassica napus OX=3708 GN=BnaA05g35410D PE=3 SV=1	0	44.25	26	5	18	3	225	24.8	6.93	71	23.69	5	4	metabolic process	cytoplasm;nucleus;proteasome	catalytic activity	Pf00227		GSBRNA2T00020601001				0	2	1.84992e+07	2.18938e+07	1.54285e+07	1.70707e+07	1.99577e+07	2.25879e+07	High	High	High	High	High	High	1
High	Master Protein	A0A078IG77	BnaA07g24130D protein OS=Brassica napus OX=3708 GN=BnaA07g24130D PE=3 SV=1	0	44.187	26	5	39	1	184	20.5	10.51	136	40.33	5	5	metabolic process	ribosome	structural molecule activity	Pf00252		GSBRNA2T00089404001				0	0	1.29748e+06	1.22612e+06	1.05736e+06	1.01928e+06	1.03111e+06	1427364	High	High	High	High	High	High	1
High	Master Protein	A0A078HZ96	BnaC04g22320D protein OS=Brassica napus OX=3708 GN=BnaC04g22320D PE=4 SV=1	0	44.084	7	8	18	8	1588	172.8	7.66	68	20.2	7	8			protein binding;RNA binding	Pf02847, Pf02854		GSBRNA2T00075197001				0	0	6.44899e+06	6.44206e+06	6.17632e+06	6.69807e+06	7.63223e+06	8.40726e+06	High	High	High	High	High	High	1
High	Master Protein	A0A078GB81	BnaA06g36640D protein OS=Brassica napus OX=3708 GN=BnaA06g36640D PE=4 SV=1	0	44.043	15	6	23	6	483	52.4	5.57	77	30.46	6	6	metabolic process		catalytic activity	Pf01546, Pf04389		GSBRNA2T00018818001				0	0	1.08887e+07	1.10319e+07	9.25158e+06	9.97053e+06	1.16699e+07	1.18123e+07	High	High	High	High	High	High	1
High	Master Protein	E1VD27	Coniferaldehyde/sinapaldehyde dehydrogenase OS=Brassica napus OX=3708 GN=REF1_I PE=3 SV=1	0	44.012	15	8	24	1	501	54.3	6.55	77	29.75	8	7	metabolic process		catalytic activity	Pf00171	111204574	GSBRNA2T00158293001	LOC111204574	C3		0	7	5.00434e+06	5.69482e+06	4.78976e+06	4.50541e+06	5.07798e+06	5.75043e+06	High	High	High	High	High	High	1
High	Master Protein	A0A078I782	BnaA03g17040D protein OS=Brassica napus OX=3708 GN=BnaA03g17040D PE=3 SV=1	0	43.925	34	5	40	1	166	18	8.97	123	81.09	5	5	metabolic process	ribosome	structural molecule activity	Pf00298, Pf03946	106391505; 106392722; 106447395	GSBRNA2T00086085001; GSBRNA2T00098471001	LOC106391505; LOC106392722; LOC106447395	A4; A3	Ribosome	1	0	2.93969e+06	3.06498e+06	2.37858e+06	2.80641e+06	3.17976e+06	3.34712e+06	High	High	High	High	High	High	1
High	Master Protein	A0A078JX92	Phosphoglycerate kinase OS=Brassica napus OX=3708 GN=BnaC02g46710D PE=3 SV=1	0	43.893	15	5	58	3	401	42.2	5.53	335	85.46	5	5	metabolic process		catalytic activity;nucleotide binding	Pf00162		GSBRNA2T00097384001				0	0	1.58544e+07	1.53657e+07	1.11265e+07	1.37127e+07	1.64536e+07	1.76089e+07	High	High	High	High	High	High	1
High	Master Protein	A0A078H151	Dihydrolipoyllysine-residue succinyltransferase OS=Brassica napus OX=3708 GN=BnaC08g15120D PE=3 SV=1	0	43.863	18	7	23	6	481	52.3	9.19	80	31.41	7	7	metabolic process		catalytic activity	Pf00198, Pf00364, Pf13533		GSBRNA2T00047347001				0	0	3.92969e+06	4.08684e+06	3.38806e+06	3.53613e+06	4.14565e+06	4.41713e+06	High	High	High	High	High	High	1
High	Master Protein	A0A078IFB3	BnaA09g09860D protein OS=Brassica napus OX=3708 GN=BnaA09g09860D PE=3 SV=1	0	43.858	18	7	18	4	503	55.4	5.99	82	26.19	7	6		nucleus	protein binding	Pf00400, Pf12265		GSBRNA2T00091601001				0	3	1.46615e+07	1.55464e+07	1.249e+07	1.31064e+07	1.60015e+07	1.78029e+07	High	High	High	High	High	High	1
High	Master Protein	A0A078G407	BnaC04g11660D protein OS=Brassica napus OX=3708 GN=BnaC04g11660D PE=3 SV=1	0	43.728	16	5	27	5	325	35.3	9.04	103	33.6	5	5	metabolic process;transport		catalytic activity;transporter activity	Pf00231	106396222	GSBRNA2T00008991001	LOC106396222	C4	Oxidative phosphorylation; Metabolic pathways	2	0	1.57543e+07	1.55455e+07	1.2403e+07	1.27241e+07	1.53855e+07	1.74681e+07	High	High	High	High	High	High	1
High	Master Protein	A0A078J765	BnaA10g30470D protein OS=Brassica napus OX=3708 GN=BnaA10g30470D PE=4 SV=1	0	43.651	26	10	19	10	390	45	7.55	69	18.33	10	8	transport			Pf00787, Pf09325		GSBRNA2T00029601001				0	0	5.99246e+06	6.43777e+06	5.29078e+06	5.60339e+06	6.36929e+06	6.64549e+06	High	High	High	High	High	High	1
High	Master Protein	A0A078FH19	BnaA06g32030D protein OS=Brassica napus OX=3708 GN=BnaA06g32030D PE=4 SV=1	0	43.607	10	6	12	6	919	102	4.94	62	21.52	6	6	cell organization and biogenesis;regulation of biological process;transport	cytoplasm;Golgi;membrane	protein binding;transporter activity	Pf00769, Pf04869, Pf04871, Pf05557, Pf08317, Pf08614, Pf09730		GSBRNA2T00078145001				0	0	3.61318e+06	4.16544e+06	3.37674e+06	3.49302e+06	4.09213e+06	4.42738e+06	High	High	High	High	High	High	1
High	Master Protein	A0A078JMS6	Proteasome subunit beta OS=Brassica napus OX=3708 GN=BnaCnng60490D PE=3 SV=1	0	43.583	33	5	18	1	245	27.6	6.8	75	22.72	5	5	metabolic process	cytoplasm;nucleus;proteasome	catalytic activity	Pf00227		GSBRNA2T00077646001				0	0	162478	190282	153466	165392	180138	180694	High	High	High	High	High	High	1
High	Master Protein	A0A078FZN7	BnaC08g04470D protein OS=Brassica napus OX=3708 GN=BnaC08g04470D PE=4 SV=1	0	43.568	31	7	21	6	260	28.3	8.75	82	20.47	7	5				Pf14290		GSBRNA2T00002151001				0	1	1.08193e+07	1.11509e+07	8.70379e+06	9.31549e+06	1.07531e+07	1.16071e+07	High	High	High	High	High	High	1
High	Master Protein	A0A078GPA2	Phenylalanyl-tRNA synthetase beta subunit OS=Brassica napus OX=3708 GN=BnaC09g41850D PE=3 SV=1	0	43.54	15	7	22	7	471	52.8	5.91	84	31.16	7	7	metabolic process	cytoplasm	catalytic activity;metal ion binding;nucleotide binding;RNA binding	Pf03483, Pf03484		GSBRNA2T00035289001				0	0	1.08892e+07	1.13523e+07	9.31523e+06	9.39176e+06	1.00713e+07	1.187e+07	High	High	High	High	High	High	1
High	Master Protein	A0A078IZS6	BnaA03g12510D protein OS=Brassica napus OX=3708 GN=BnaA03g12510D PE=3 SV=1	0	43.496	34	6	17	6	170	19.2	4.83	82	23.89	6	6	metabolic process	membrane	catalytic activity	Pf04716		GSBRNA2T00017890001				0	0	5.46858e+06	6.23854e+06	4.95512e+06	5.41192e+06	6.31257e+06	6.77608e+06	High	High	High	High	High	High	1
High	Master Protein	A0A078IRK8	BnaA07g37840D protein OS=Brassica napus OX=3708 GN=BnaA07g37840D PE=3 SV=1	0	43.463	13	2	42	2	201	22.2	6.84	204	68.92	2	2	metabolic process		catalytic activity	Pf00121		GSBRNA2T00011246001				0	0	3.79539e+07	3.9426e+07	2.92483e+07	3.15817e+07	3.79396e+07	4.21806e+07	High	High	High	High	High	High	1
High	Master Protein	A0A078HMF5	Transmembrane 9 superfamily member OS=Brassica napus OX=3708 GN=BnaA04g07300D PE=3 SV=1	0	43.437	4	2	19	2	689	78.1	6.79	121	37.01	2	2	transport	membrane	transporter activity	Pf00654, Pf02990		GSBRNA2T00068462001				0	0	4.13785e+06	3.82312e+06	3.51761e+06	3.60618e+06	4.23442e+06	4.43599e+06	High	High	High	High	High	High	1
High	Master Protein	A0A078F9H9	BnaA05g26690D protein OS=Brassica napus OX=3708 GN=BnaA05g26690D PE=4 SV=1	0	43.398	23	3	26	2	204	22	4.49	117	46.78	3	3				Pf00627, Pf01849	106452386	GSBRNA2T00000194001	LOC106452386	A3		0	1	1.72922e+07	1.86338e+07	1.51777e+07	1.51509e+07	1.73471e+07	1.61086e+07	High	High	High	High	High	High	1
High	Master Protein	A0A078H4S9	Asparagine--tRNA ligase OS=Brassica napus OX=3708 GN=BnaC09g33230D PE=3 SV=1	0	43.316	15	9	25	1	575	63.6	5.26	85	36.38	8	8	metabolic process	cytoplasm	catalytic activity;nucleotide binding	Pf00152, Pf01336	106432830	GSBRNA2T00053005001	LOC106432830	C9	Aminoacyl-tRNA biosynthesis	1	0	303818	286804	284933	296203	271649	354365	High	High	High	High	High	High	1
High	Master Protein	A0A078FRN4	Pre-mRNA-processing factor 19 OS=Brassica napus OX=3708 GN=BnaA05g10230D PE=3 SV=1	0	43.304	16	5	20	2	525	56.6	6.02	68	30.65	5	5	metabolic process		catalytic activity;metal ion binding;protein binding	Pf00400, Pf04564, Pf08606, Pf11789	106367476	GSBRNA2T00095226001	LOC106367476	A5	Ubiquitin mediated proteolysis; Spliceosome	2	0	1.36587e+06	1.4039e+06	1.21164e+06	1.21778e+06	1.55436e+06	1.44015e+06	High	High	High	High	High	High	1
High	Master Protein	A0A078HFK7	L-ascorbate peroxidase OS=Brassica napus OX=3708 GN=BnaAnng04450D PE=3 SV=1	0	43.282	30	7	19	7	355	38.9	7.24	72	23.95	7	6	metabolic process;response to stimulus		antioxidant activity;catalytic activity	Pf00141		GSBRNA2T00060092001				0	0	1.0542e+07	1.06781e+07	8.79457e+06	9.04425e+06	1.13194e+07	1.16386e+07	High	High	High	High	High	High	1
High	Master Protein	A0A078F6A8	BnaC04g19410D protein OS=Brassica napus OX=3708 GN=BnaC04g19410D PE=3 SV=1	0	43.221	11	4	37	1	511	55.4	7.15	152	52.33	4	4	metabolic process		catalytic activity	Pf00026, Pf03489, Pf05184, Pf14543		GSBRNA2T00000450001				0	0	71944.6	76117.9	62552.6	63606.7	70085.9	75038.3	High	High	High	High	High	High	1
High	Master Protein	A0A078FGS0	BnaA03g00990D protein OS=Brassica napus OX=3708 GN=BnaA03g00990D PE=4 SV=1	0	43.218	10	4	16	3	435	47	5.17	63	26.19	4	4	metabolic process		catalytic activity;nucleotide binding	Pf00070, Pf07992	106428595	GSBRNA2T00049292001	LOC106428595	A3	Ascorbate and aldarate metabolism; Metabolic pathways	2	0	5.85451e+06	6.28922e+06	4.78918e+06	5.27971e+06	6.23523e+06	6.43275e+06	High	High	High	High	High	High	1
High	Master Protein	A0A078GF24	BnaA04g05360D protein OS=Brassica napus OX=3708 GN=BnaA04g05360D PE=4 SV=1	0	43.212	25	3	33	1	146	16.6	7.02	148	47.04	3	3				Pf00179	106445164	GSBRNA2T00021772001	LOC106445164	A4		0	0	317753	287486	253920	284266	315898	316330	High	High	High	High	High	High	1
High	Master Protein	A0A078CLT5	BnaA09g16170D protein OS=Brassica napus OX=3708 GN=BnaA09g16170D PE=3 SV=1	0	43.186	17	7	35	6	359	41	10.02	102	41.26	7	6	metabolic process	ribosome	structural molecule activity	Pf00297		GSBRNA2T00128690001; GSBRNA2T00006720001				0	1	6.43692e+07	6.75178e+07	6.29535e+07	5.9822e+07	7.59293e+07	9.11227e+07	High	High	High	High	High	High	1
High	Master Protein	A0A078IMF3	BnaCnng20150D protein OS=Brassica napus OX=3708 GN=BnaCnng20150D PE=4 SV=1	0	43.08	12	5	17	5	440	49.9	5.82	70	25.22	5	5			nucleotide binding	Pf00270, Pf00271		GSBRNA2T00098284001				0	0	4.06659e+07	4.1365e+07	3.81062e+07	3.88983e+07	4.85527e+07	4.96723e+07	High	High	High	High	High	High	1
High	Master Protein	A0A078IAM6	BnaC05g50520D protein OS=Brassica napus OX=3708 GN=BnaC05g50520D PE=4 SV=1	0	43.071	14	8	19	2	651	72.4	6.01	68	22.12	8	7	metabolic process	cytoplasm	catalytic activity;nucleotide binding	Pf01411		GSBRNA2T00083616001				0	0	225244	241851	234768	224436	466600	249017	High	High	High	High	High	High	1
High	Master Protein	A0A078JJ88	BnaCnng46950D protein OS=Brassica napus OX=3708 GN=BnaCnng46950D PE=3 SV=1	0	43.037	22	4	17	1	258	28.6	6.13	87	35.29	4	4	metabolic process		catalytic activity	Pf00753	106452711; 106452712	GSBRNA2T00045784001	LOC106452711; LOC106452712	C5	Pyruvate metabolism	1	0	705654	727481	510268	721173	823122	877333	High	High	High	High	High	High	1
High	Master Protein	A0A078H7D4	BnaC01g21930D protein OS=Brassica napus OX=3708 GN=BnaC01g21930D PE=4 SV=1	0	43.013	11	7	17	2	820	92.4	6.57	66	24.77	7	6		membrane				GSBRNA2T00056528001				0	0	734158	738648	596279	679307	783465	764645	High	High	High	High	High	High	1
High	Master Protein	A0A078FMN3	Dihydrolipoamide acetyltransferase component of pyruvate dehydrogenase complex OS=Brassica napus OX=3708 GN=BnaA06g33300D PE=3 SV=1	0	43.005	14	5	44	5	477	49.6	8.94	155	47.48	5	3	metabolic process		catalytic activity	Pf00198, Pf00364, Pf02817	106349412	GSBRNA2T00078001001	LOC106349412	A6	Carbon metabolism; Glycolysis / Gluconeogenesis; Metabolic pathways; Pyruvate metabolism; Biosynthesis of secondary metabolites; Citrate cycle (TCA cycle)	6	0	2.33782e+07	2.51706e+07	2.08046e+07	2.04678e+07	2.47473e+07	2.42875e+07	High	High	High	High	High	High	1
High	Master Protein	A0A078G4C1	Vesicle-fusing ATPase OS=Brassica napus OX=3708 GN=BnaC03g30040D PE=3 SV=1	0	42.939	13	8	26	7	714	78.7	6.34	92	23.23	8	6			catalytic activity;nucleotide binding;RNA binding	Pf00004, Pf00910, Pf01057, Pf01078, Pf02359, Pf02933, Pf06068, Pf07724, Pf07728, Pf09848, Pf13401		GSBRNA2T00015661001				0	1	2.84001e+07	2.97638e+07	2.23325e+07	2.40083e+07	3.00414e+07	2.97466e+07	High	High	High	High	High	High	1
High	Master Protein	A0A078F7Z7	BnaC02g20230D protein OS=Brassica napus OX=3708 GN=BnaC02g20230D PE=3 SV=1	0	42.908	13	6	16	5	593	65.3	8.82	77	22	6	4	regulation of biological process			Pf06905, Pf10151		GSBRNA2T00031018001				0	1	8.3001e+06	7.96861e+06	6.64741e+06	7.49988e+06	8.71454e+06	9.47382e+06	High	High	High	High	High	High	1
High	Master Protein	A0A078JSK5	BnaAnng30320D protein OS=Brassica napus OX=3708 GN=BnaAnng30320D PE=3 SV=1	0	42.871	21	6	32	4	301	33.7	6.35	103	27.55	6	6	metabolic process		catalytic activity	Pf00248		GSBRNA2T00087378001				0	2	1.09804e+07	1.1588e+07	9.211e+06	1.06942e+07	1.28813e+07	1.40847e+07	High	High	High	High	High	High	1
High	Master Protein	A0A078IY29	Ubiquitinyl hydrolase 1 OS=Brassica napus OX=3708 GN=BnaC03g73540D PE=3 SV=1	0	42.863	9	9	24	3	1111	129.6	5.67	78	31.17	9	8	metabolic process		catalytic activity;protein binding	Pf00443, Pf00917, Pf12436, Pf13423, Pf14533		GSBRNA2T00011702001				0	0	1.0458e+06	1.09811e+06	856086	983061	1.0401e+06	1.19862e+06	High	High	High	High	High	High	1
High	Master Protein	A0A078F657	BnaA05g28080D protein OS=Brassica napus OX=3708 GN=BnaA05g28080D PE=3 SV=1	0	42.789	22	4	15	1	258	28.7	6.58	78	32.55	4	4	metabolic process		catalytic activity	Pf00753	106452633	GSBRNA2T00000361001	LOC106452633	A5	Pyruvate metabolism	1	3	5.36556e+06	4.81096e+06	4.32114e+06	5.14268e+06	6.26486e+06	6.73312e+06	High	High	High	High	High	High	1
High	Master Protein	A0A078I4I1	Guanosine nucleotide diphosphate dissociation inhibitor OS=Brassica napus OX=3708 GN=BnaC04g22610D PE=3 SV=1	0	42.788	14	5	36	1	444	49.6	5.74	133	48.49	5	4	metabolic process;regulation of biological process;response to stimulus;transport		catalytic activity;enzyme regulator activity	Pf00996	106396818	GSBRNA2T00082699001	LOC106396818	C4		0	0	693053	691033	574809	570289	679842	786751	High	High	High	High	High	High	1	Acetyl [N-Term]
High	Master Protein	A0A078F7R4	BnaC03g71040D protein OS=Brassica napus OX=3708 GN=BnaC03g71040D PE=3 SV=1	0	42.788	17	7	18	1	513	57.6	8.88	71	18.3	7	7				Pf01798, Pf08060, Pf08156		GSBRNA2T00032460001				0	0	365262	384412	336639	280459	370573	423571	High	High	High	High	High	High	1
High	Master Protein	A0A078C5F6	BnaA09g35930D protein OS=Brassica napus OX=3708 GN=BnaA09g35930D PE=4 SV=1	0	42.699	33	4	21	3	129	14.2	6.38	102	34.61	3	4			catalytic activity	Pf01230, Pf11969	106367984; 106367987	GSBRNA2T00037081001; GSBRNA2T00155949001	LOC106367984; LOC106367987	C8		0	1	6.54261e+06	6.81273e+06	5.81002e+06	5.98916e+06	7.22877e+06	7.38338e+06	High	High	High	High	High	High	1
High	Master Protein	A0A078GT01	Aminopeptidase OS=Brassica napus OX=3708 GN=BnaC03g66770D PE=3 SV=1	0	42.676	8	6	29	1	875	98.2	5.2	118	30.76	6	6	metabolic process		catalytic activity;metal ion binding	Pf01433, Pf11838, Pf13485		GSBRNA2T00040025001				0	0	58611	70390.5	49764	64344.8	61476.8	74677.7	High	High	High	High	High	High	1
High	Master Protein	A0A078HM58	GrpE protein homolog OS=Brassica napus OX=3708 GN=BnaA10g17040D PE=3 SV=1	0	42.668	27	7	20	3	320	34.9	4.58	74	25.28	7	7	metabolic process;regulation of biological process	mitochondrion;organelle lumen	enzyme regulator activity;nucleotide binding;protein binding	Pf01025	106387744	GSBRNA2T00065897001	LOC106387744	A10		0	4	7.86819e+06	8.66838e+06	6.61974e+06	6.66167e+06	7.80036e+06	8.56707e+06	High	High	High	High	High	High	1
High	Master Protein	A0A078JIF1	BnaCnng47600D protein OS=Brassica napus OX=3708 GN=BnaCnng47600D PE=3 SV=1	0	42.613	18	6	33	6	421	46.4	6.32	144	40.44	5	5	metabolic process;response to stimulus		metal ion binding;nucleotide binding;protein binding	Pf00226, Pf00684, Pf01556	106421341; 106421362	GSBRNA2T00046786001	LOC106421341; LOC106421362		Protein processing in endoplasmic reticulum	1	0	7.63436e+06	8.75968e+06	7.38891e+06	6.76777e+06	8.86148e+06	9.11203e+06	High	High	High	High	High	High	1
High	Master Protein	A0A078FEN2	BnaC07g15930D protein OS=Brassica napus OX=3708 GN=BnaC07g15930D PE=3 SV=1	0	42.553	7	4	19	2	760	79.9	6.71	95	26.24	4	3	metabolic process		catalytic activity	Pf00082, Pf05922	106390308; 106390316	GSBRNA2T00070481001	LOC106390308; LOC106390316	C7		0	3	5.24929e+06	5.57058e+06	4.57366e+06	4.18184e+06	4.64664e+06	4.6809e+06	High	High	High	High	High	High	1
High	Master Protein	Q05966	Glycine-rich RNA-binding protein 10 OS=Brassica napus OX=3708 GN=GRP10 PE=2 SV=1	0	42.43	41	7	35	3	169	16.3	5.68	138	30.87	7	5			RNA binding	Pf00076, Pf13893, Pf14259	106438956; 106438942		LOC106438956; LOC106438942	C1		0	4	9.64224e+06	1.0009e+07	8.5888e+06	8.23106e+06	9.4435e+06	1.02479e+07	High	High	High	High	High	High	1
High	Master Protein	A0A078JXL0	BnaCnng72890D protein (Fragment) OS=Brassica napus OX=3708 GN=BnaCnng72890D PE=4 SV=1	0	42.31	12	5	20	5	382	40.4	4.89	89	24.6	5	5			protein binding	Pf00515, Pf13371, Pf13414, Pf13424, Pf13432, Pf14559		GSBRNA2T00014896001				0	0	1.9407e+07	2.24331e+07	1.71204e+07	1.70072e+07	1.99914e+07	2.15067e+07	High	High	High	High	High	High	1
High	Master Protein	A0A078FFX9	BnaC03g13000D protein OS=Brassica napus OX=3708 GN=BnaC03g13000D PE=4 SV=1	0	42.277	7	5	15	5	919	102.8	5.29	65	22.3	5	5	cell organization and biogenesis		protein binding	Pf00626, Pf02209		GSBRNA2T00060708001				0	0	2.13732e+06	2.23253e+06	1.8289e+06	2.04306e+06	2.20915e+06	2.2706e+06	High	High	High	High	High	High	1
High	Master Protein	A0A078IB90	ATP:AMP phosphotransferase OS=Brassica napus OX=3708 GN=BnaCnng15820D PE=3 SV=1	0	42.135	20	4	31	1	240	26.4	7.42	137	39.96	4	4	metabolic process		catalytic activity;nucleotide binding	Pf00406, Pf05191, Pf06414, Pf13207	106409159	GSBRNA2T00088937001	LOC106409159	C7	Biosynthesis of secondary metabolites; Metabolic pathways; Purine metabolism; Thiamine metabolism	4	0	1.0541e+06	1.09028e+06	927458	1.03411e+06	1.19044e+06	1.28073e+06	High	High	High	High	High	High	1
High	Master Protein	A0A078IYG6	BnaCnng31750D protein OS=Brassica napus OX=3708 GN=BnaCnng31750D PE=3 SV=1	0	42.125	23	5	21	2	240	26.7	7.11	89	29.4	5	5		membrane		Pf00635	106432130	GSBRNA2T00020725001	LOC106432130	C6		0	0	5.67214e+06	5.76761e+06	5.0757e+06	5.73851e+06	6.65347e+06	6.90474e+06	High	High	High	High	High	High	1
High	Master Protein	A0A078FNK6	Procollagen-proline 4-dioxygenase OS=Brassica napus OX=3708 GN=BnaC09g38980D PE=3 SV=1	0	42.078	20	5	19	3	299	33.1	7.14	84	25.52	5	5	metabolic process		catalytic activity;metal ion binding	Pf01549, Pf03171, Pf13640		GSBRNA2T00078407001				0	2	4.36245e+06	4.66683e+06	4.07373e+06	3.74504e+06	4.54085e+06	5.00249e+06	High	High	High	High	High	High	1
High	Master Protein	A0A078FKP2	Protein transport protein SEC23 OS=Brassica napus OX=3708 GN=BnaC04g29030D PE=3 SV=1	0	42.068	12	7	23	1	736	81.1	5.92	102	22.83	7	5	transport	cytoplasm	metal ion binding	Pf00626, Pf04810, Pf04811, Pf04815, Pf08033		GSBRNA2T00070313001				0	0	5.3821e+06	5.84786e+06	5.76344e+06	4.22375e+06	5.47598e+06	5.59655e+06	High	High	High	High	High	High	1
High	Master Protein	A0A078G4X5	Glutamyl-tRNA synthetase OS=Brassica napus OX=3708 GN=BnaA09g04160D PE=3 SV=1	0	42.009	13	10	31	10	721	81.4	7.65	81	19.99	10	9	metabolic process	cytoplasm	catalytic activity;nucleotide binding	Pf00749, Pf01406, Pf03950, Pf13410, Pf14497		GSBRNA2T00009509001				0	0	9.72875e+06	9.74825e+06	8.49426e+06	8.65718e+06	9.5509e+06	1.10506e+07	High	High	High	High	High	High	1
High	Master Protein	A0A078JDU9	Procollagen-proline 4-dioxygenase OS=Brassica napus OX=3708 GN=BnaAnng18690D PE=3 SV=1	0	41.979	20	5	15	5	316	35.5	6.29	67	17.91	5	5	metabolic process		catalytic activity;metal ion binding	Pf01549, Pf03171, Pf13640		GSBRNA2T00038040001				0	0	5.62837e+06	5.40549e+06	4.11969e+06	3.37432e+06	3.64226e+06	4.36328e+06	High	High	High	High	High	High	1
High	Master Protein	A0A078HGH7	tRNA (guanine-N(7)-)-methyltransferase non-catalytic subunit OS=Brassica napus OX=3708 GN=BnaC08g45780D PE=3 SV=1	0	41.892	6	6	14	1	1145	124.9	6.57	62	19.78	6	6	metabolic process	nucleus	catalytic activity;metal ion binding;nucleotide binding;protein binding	Pf00289, Pf00364, Pf00400, Pf02222, Pf02785, Pf02786, Pf07478, Pf08443, Pf13437, Pf13533, Pf13535, Pf15632		GSBRNA2T00064018001				0	0	119713	122937	108465	107056	105577	127203	High	High	High	High	High	High	1
High	Master Protein	A0A078IK98	Serine hydroxymethyltransferase OS=Brassica napus OX=3708 GN=BnaCnng19300D PE=3 SV=1	0	41.866	19	6	37	1	434	47.4	6.84	161	42.95	6	4	metabolic process		catalytic activity	Pf00155, Pf00464		GSBRNA2T00096661001; GSBRNA2T00111262001				0	0	2.98338e+06	3.0305e+06	2482097	2.51447e+06	3.1937e+06	3.47474e+06	High	High	High	High	High	High	1
High	Master Protein	A0A078GFM5	Citrate synthase OS=Brassica napus OX=3708 GN=BnaC04g49560D PE=3 SV=1	0	41.846	13	5	19	3	475	52.7	6.99	77	30.54	4	5	metabolic process		catalytic activity	Pf00285		GSBRNA2T00022038001				0	2	5.60014e+06	5.56581e+06	4.80637e+06	5.44043e+06	6.27853e+06	6.86146e+06	High	High	High	High	High	High	1
High	Master Protein	A0A078I0G4	BnaA02g29970D protein OS=Brassica napus OX=3708 GN=BnaA02g29970D PE=3 SV=1	0	41.834	7	4	23	3	688	73.3	6.71	104	30.44	4	4	metabolic process		catalytic activity	Pf00082, Pf05922		GSBRNA2T00080049001				0	0	6.51278e+06	6.98388e+06	5.09624e+06	4.6796e+06	5.3996e+06	5.89864e+06	High	High	High	High	High	High	1
High	Master Protein	A0A078FMU6	Threonine synthase OS=Brassica napus OX=3708 GN=BnaA08g13300D PE=3 SV=1	0	41.797	12	5	30	3	525	57.8	7.12	148	35.49	5	4	metabolic process			Pf00291		GSBRNA2T00078762001				0	0	2.69032e+06	2.76274e+06	2.45671e+06	2.48883e+06	2.99393e+06	2.88421e+06	High	High	High	High	High	High	1
High	Master Protein	A0A078H5C1	UDP-glucuronate decarboxylase OS=Brassica napus OX=3708 GN=BnaA02g07140D PE=3 SV=1	0	41.797	19	7	43	2	342	38.5	8.21	136	43.52	7	7	metabolic process		catalytic activity	Pf01073, Pf01370, Pf02719, Pf04321, Pf07993	106361841	GSBRNA2T00052692001	LOC106361841	A3	Amino sugar and nucleotide sugar metabolism; Metabolic pathways	2	7	2.57863e+07	2.59285e+07	1.75468e+07	1.97396e+07	2.3574e+07	2.56631e+07	High	High	High	High	High	High	1
High	Master Protein	A0A078HPT8	Protein ROOT HAIR DEFECTIVE 3 homolog OS=Brassica napus OX=3708 GN=BnaAnng05450D PE=3 SV=1	0	41.732	7	7	26	6	831	93.3	6.18	77	23.39	7	7		endoplasmic reticulum;membrane	catalytic activity;nucleotide binding	Pf00350, Pf01926, Pf02263, Pf05879	106386382	GSBRNA2T00067875001	LOC106386382	A6		0	1	8.1518e+06	7.89461e+06	7.09722e+06	7.59197e+06	8.11219e+06	8.6099e+06	High	High	High	High	High	High	1
High	Master Protein	A0A078HIS1	BnaC02g31440D protein OS=Brassica napus OX=3708 GN=BnaC02g31440D PE=4 SV=1	0	41.686	21	4	47	2	195	21.6	6.58	199	36.64	4	3			nucleotide binding	Pf00012		GSBRNA2T00062537001				0	0	2.07522e+06	2.1812e+06	1.5469e+06	1.61323e+06	1.92997e+06	2.16631e+06	High	High	High	High	High	High	1
High	Master Protein	A0A078I4H2	Alpha-galactosidase OS=Brassica napus OX=3708 GN=BnaC02g01160D PE=3 SV=1	0	41.679	20	7	16	3	394	44.1	8.65	69	20.62	7	7	metabolic process		catalytic activity	Pf02065		GSBRNA2T00080770001				0	4	5.36024e+06	5.59749e+06	4.76564e+06	5.17551e+06	5.47432e+06	6.12764e+06	High	High	High	High	High	High	1
High	Master Protein	A0A078JB60	BnaA01g36890D protein OS=Brassica napus OX=3708 GN=BnaA01g36890D PE=4 SV=1	0	41.655	10	5	13	1	632	68.2	5.66	68	20.31	5	5	metabolic process	membrane	catalytic activity;nucleotide binding;protein binding	Pf00069, Pf07714, Pf08263, Pf12799, Pf13855	106347387	GSBRNA2T00033635001	LOC106347387	A1		0	4	3.38764e+06	3.56422e+06	2.94901e+06	3.34064e+06	4.22993e+06	3.99544e+06	High	High	High	High	High	High	1
High	Master Protein	A0A078J8P4	BnaC03g76380D protein OS=Brassica napus OX=3708 GN=BnaC03g76380D PE=4 SV=1	0	41.647	13	5	28	2	331	35.3	9.61	112	32.66	5	4	metabolic process		catalytic activity	Pf01019		GSBRNA2T00034376001				0	3	1.88835e+07	1.84225e+07	1.58022e+07	1.75166e+07	20381190	2.16089e+07	High	High	High	High	High	High	1
High	Master Protein	A0A078IBF2	Ubiquitin carboxyl-terminal hydrolase OS=Brassica napus OX=3708 GN=BnaA08g01820D PE=3 SV=1	0	41.611	14	6	26	1	483	54	6.09	112	35.86	6	6	metabolic process		catalytic activity;protein binding	Pf00240, Pf00443, Pf13423		GSBRNA2T00085758001				0	0	803788	805588	677940	687493	819991	819817	High	High	High	High	High	High	1
High	Master Protein	A0A078GR87	Glutaredoxin-dependent peroxiredoxin OS=Brassica napus OX=3708 GN=BnaA05g31230D PE=3 SV=1	0	41.556	25	4	18	4	201	21.5	8.88	95	27.66	4	4	cellular homeostasis;metabolic process;regulation of biological process		antioxidant activity;catalytic activity	Pf00578, Pf01123, Pf08534		GSBRNA2T00038509001				0	0	1.42851e+07	1.50985e+07	1.18269e+07	1.35615e+07	1.62815e+07	1.58748e+07	High	High	High	High	High	High	1
High	Master Protein	A0A078J995	BnaCnng42590D protein OS=Brassica napus OX=3708 GN=BnaCnng42590D PE=3 SV=1	0	41.481	30	6	18	5	276	29.3	8.72	87	23.42	6	4	transport	membrane	transporter activity	Pf01459		GSBRNA2T00039614001				0	0	1.15768e+07	1.27403e+07	1.0339e+07	1.089e+07	1.26162e+07	1.28793e+07	High	High	High	High	High	High	1
High	Master Protein	A0A078FGJ5	Protein transport protein SEC23 OS=Brassica napus OX=3708 GN=BnaC03g59930D PE=3 SV=1	0	41.401	12	7	23	1	737	81.1	6.09	103	23.59	7	5	transport	cytoplasm	metal ion binding	Pf00626, Pf04810, Pf04811, Pf04815, Pf08033		GSBRNA2T00061044001				0	7	2.4902e+07	2.50267e+07	2.20223e+07	1.96224e+07	2.45639e+07	2.61408e+07	High	High	High	High	High	High	1
High	Master Protein	A0A4Y5L990	Chalcone synthase (Fragment) OS=Brassica napus OX=3708 GN=Chs PE=3 SV=1	0	41.23	12	4	29	2	394	42.9	6.42	108	41.49	4	3										0	0	1.06176e+06	1.09967e+06	981176	1.07849e+06	1.2025e+06	1.21827e+06	High	High	High	High	High	High	1
High	Master Protein	H6VMY9	Chloroplast MPBQ/MSBQ methyltransferase OS=Brassica napus OX=3708 GN=BnaX.VTE3.b PE=3 SV=1	0	41.221	12	3	24	3	339	37.9	9.01	132	46.33	3	3	metabolic process		catalytic activity	Pf01209, Pf08241, Pf08242, Pf12847, Pf13489, Pf13649, Pf13847	106410579	GSBRNA2T00132145001	LOC106410579		Biosynthesis of secondary metabolites; Ubiquinone and other terpenoid-quinone biosynthesis; Metabolic pathways	3	0	6.63882e+06	6.71425e+06	5.90051e+06	6.2949e+06	6.79462e+06	7.44139e+06	High	High	High	High	High	High	1
High	Master Protein	A0A078J6H2	Chorismate synthase OS=Brassica napus OX=3708 GN=BnaA05g36390D PE=3 SV=1	0	41.189	15	7	25	1	438	47.4	8.1	114	26.74	7	6	metabolic process		catalytic activity	Pf01264		GSBRNA2T00028132001				0	0	2.20445e+06	2.32684e+06	2.02489e+06	1703309	1.99362e+06	2.18446e+06	High	High	High	High	High	High	1
High	Master Protein	A0A078GJV0	BnaA03g59920D protein OS=Brassica napus OX=3708 GN=BnaA03g59920D PE=3 SV=1	0	41.151	12	4	26	3	511	55.3	7.31	129	35.18	4	3	metabolic process		catalytic activity	Pf00026, Pf03489, Pf05184, Pf14543		GSBRNA2T00028653001				0	0	378479	388987	346063	162017	183906	175897	High	High	High	High	High	High	1
High	Master Protein	A0A078G4K6	BnaC09g31680D protein OS=Brassica napus OX=3708 GN=BnaC09g31680D PE=3 SV=1	0	41.147	16	7	23	1	585	65.2	5.12	84	30.72	7	6	cell organization and biogenesis		protein binding	Pf03999		GSBRNA2T00009690001				0	1	1.29486e+06	1.36839e+06	1.14983e+06	1.17129e+06	1.3032e+06	1.45362e+06	High	High	High	High	High	High	1
High	Master Protein	A0A078JQ94	BnaCnng55470D protein OS=Brassica napus OX=3708 GN=BnaCnng55470D PE=4 SV=1	0	41.098	11	5	13	1	583	63.2	5.55	67	19.86	5	5	metabolic process	membrane	catalytic activity;nucleotide binding;protein binding	Pf00069, Pf07714, Pf12799, Pf13855		GSBRNA2T00064460001				0	0							High	High	High	High	High	High	1
High	Master Protein	A0A078IAG3	BnaA05g20600D protein OS=Brassica napus OX=3708 GN=BnaA05g20600D PE=3 SV=1	0	40.96	15	4	22	4	365	39.3	5.67	87	32.21	4	4	metabolic process		catalytic activity;metal ion binding	Pf00107, Pf08240	106428381	GSBRNA2T00083364001	LOC106428381	A5	Metabolic pathways; Biosynthesis of secondary metabolites; Phenylpropanoid biosynthesis	3	0	1.03836e+07	9.99646e+06	8.68937e+06	9.28228e+06	1.02962e+07	1.09082e+07	High	High	High	High	High	High	1
High	Master Protein	A0A078GX50	Carboxypeptidase OS=Brassica napus OX=3708 GN=BnaC03g55150D PE=3 SV=1	0	40.945	15	7	24	7	509	56.9	5.71	74	26.08	7	7	metabolic process		catalytic activity	Pf00450	106425067	GSBRNA2T00047067001	LOC106425067			0	0	3.94394e+06	4.09493e+06	3.75066e+06	3.87888e+06	4.11255e+06	4.75441e+06	High	High	High	High	High	High	1
High	Master Protein	A0A078FL57	Alpha-mannosidase OS=Brassica napus OX=3708 GN=BnaA06g32690D PE=3 SV=1	0	40.909	9	8	23	8	1021	115.2	6.25	84	25.41	8	7	metabolic process		catalytic activity;metal ion binding	Pf01074, Pf07748, Pf09261		GSBRNA2T00078074001				0	0	8.67938e+06	9.28633e+06	7.43645e+06	7.65174e+06	8.83151e+06	9.3903e+06	High	High	High	High	High	High	1
High	Master Protein	A0A078FR95	BnaC04g48400D protein OS=Brassica napus OX=3708 GN=BnaC04g48400D PE=4 SV=1	0	40.869	13	7	17	3	612	66.4	7.88	67	21.32	7	7			catalytic activity;DNA binding;nucleotide binding	Pf00270, Pf00271, Pf04851	106391721	GSBRNA2T00084725001	LOC106391721	C4		0	4	7.78906e+06	8.11416e+06	5.91957e+06	6.5877e+06	8.82582e+06	9.06004e+06	High	High	High	High	High	High	1
High	Master Protein	A0A078GVS3	Imidazole glycerol phosphate synthase hisHF OS=Brassica napus OX=3708 GN=BnaC01g19110D PE=3 SV=1	0	40.866	17	10	29	2	586	63.6	6.76	91	26.62	10	10	metabolic process	cytoplasm	catalytic activity	Pf00117, Pf00977, Pf01174, Pf02548, Pf07685		GSBRNA2T00042195001				0	8	2.03389e+07	2.2293e+07	1.90144e+07	1.8304e+07	2.10846e+07	2.32187e+07	High	High	High	High	High	High	1
High	Master Protein	A0A078IG54	BnaA02g28150D protein OS=Brassica napus OX=3708 GN=BnaA02g28150D PE=3 SV=1	0	40.854	15	4	41	1	368	39.6	8.76	195	42.75	4	3	metabolic process		catalytic activity	Pf00044, Pf02800		GSBRNA2T00092181001				0	0	2.33268e+06	2.28115e+06	2.07678e+06	2.28745e+06	2.80732e+06	2.7865e+06	High	High	High	High	High	High	1
High	Master Protein	Q949M2	3-oxoacyl-[acyl-carrier-protein] reductase 4 (Fragment) OS=Brassica napus OX=3708 GN=bkr4 PE=2 SV=1	0	40.852	22	6	32	1	254	26.6	5.85	92	37.52	5	6	metabolic process		catalytic activity;metal ion binding;nucleotide binding	Pf00106, Pf08659, Pf13561	106425465		LOC106425465	C7		0	0							High	High	High	High	High	High	1
High	Master Protein	A0A078JQX9	Profilin OS=Brassica napus OX=3708 GN=BnaA01g34880D PE=3 SV=1	0	40.831	41	3	39	2	131	14.2	4.82	153	44.32	3	3		cytoplasm;cytoskeleton	protein binding	Pf00235		GSBRNA2T00080383001				0	0	1.62689e+06	1.78023e+06	1.40976e+06	1.45262e+06	1.68948e+06	1.79572e+06	High	High	High	High	High	High	1
High	Master Protein	A0A078H1S8	Dolichyl-diphosphooligosaccharide--protein glycosyltransferase 48 kDa subunit OS=Brassica napus OX=3708 GN=BnaC07g16630D PE=3 SV=1	0	40.819	11	4	27	4	437	48.6	6.54	138	38.12	4	4	cell organization and biogenesis;metabolic process	endoplasmic reticulum;membrane	catalytic activity	Pf02084, Pf03345	106390371	GSBRNA2T00046179001	LOC106390371	C7	Metabolic pathways; N-Glycan biosynthesis; Protein processing in endoplasmic reticulum	3	0	3.93597e+07	4.27956e+07	3.52385e+07	3.72736e+07	4.22048e+07	4.16661e+07	High	High	High	High	High	High	1
High	Master Protein	A0A078FDJ2	BnaA09g39570D protein OS=Brassica napus OX=3708 GN=BnaA09g39570D PE=4 SV=1	0	40.758	7	9	23	9	1258	142	7.17	75	29.01	9	8				Pf14566		GSBRNA2T00049453001				0	0	1.16834e+07	1.20342e+07	1.06337e+07	1.0474e+07	1.16412e+07	1.24488e+07	High	High	High	High	High	High	1
High	Master Protein	A0A078G1A9	BnaC01g24000D protein OS=Brassica napus OX=3708 GN=BnaC01g24000D PE=4 SV=1	0	40.715	10	4	12	1	572	64.3	7.68	71	20.65	4	4	metabolic process		catalytic activity	Pf00355, Pf08417		GSBRNA2T00012313001				0	0	131396	176545	146896	125559	167112	176371	High	High	High	High	High	High	1
High	Master Protein	A0A078H395	Acetyltransferase component of pyruvate dehydrogenase complex OS=Brassica napus OX=3708 GN=BnaC06g07040D PE=3 SV=1	0	40.647	13	6	40	1	555	60.1	6.99	156	34.67	6	5	metabolic process	organelle lumen	catalytic activity	Pf00198, Pf00364, Pf02817		GSBRNA2T00053717001				0	0	1.13049e+06	1.12792e+06	953880	1.08064e+06	1.25149e+06	1.23798e+06	High	High	High	High	High	High	1
High	Master Protein	A0A078G8J6	Pectinesterase OS=Brassica napus OX=3708 GN=BnaA08g25320D PE=4 SV=1	0	40.6	22	6	19	5	350	38.7	8.94	68	28.07	5	6	cell organization and biogenesis		catalytic activity	Pf01095	106360224	GSBRNA2T00015147001	LOC106360224	A8	Metabolic pathways; Pentose and glucuronate interconversions	2	1	4.11557e+06	4.42572e+06	3.47218e+06	5.59149e+06	6.33321e+06	7.10633e+06	High	High	High	High	High	High	1
High	Master Protein	A0A078INM1	BnaC05g47950D protein OS=Brassica napus OX=3708 GN=BnaC05g47950D PE=4 SV=1	0	40.593	28	3	12	3	159	17.6	7.37	73	23	3	3	response to stimulus			Pf00582		GSBRNA2T00097263001				0	0	5.32265e+06	6.18039e+06	4.41748e+06	5.52828e+06	6.40795e+06	7.38252e+06	High	High	High	High	High	High	1
High	Master Protein	A0A078GTB8	BnaA07g04630D protein OS=Brassica napus OX=3708 GN=BnaA07g04630D PE=4 SV=1	0	40.538	15	7	20	7	530	60.1	5.97	73	24.01	7	6		membrane				GSBRNA2T00038720001				0	0	4.63133e+06	4.89671e+06	4.58157e+06	5.00738e+06	5.08353e+06	5.78576e+06	High	High	High	High	High	High	1
High	Master Protein	A0A078FB92	BnaA07g28360D protein OS=Brassica napus OX=3708 GN=BnaC06g30890D PE=4 SV=1	0	40.535	26	7	22	6	286	31.3	5.43	74	23.91	7	6		membrane		Pf01145	106405664; 106432564	GSBRNA2T00066558001; GSBRNA2T00049791001	LOC106405664; LOC106432564	C6; A7		0	1	1.77316e+07	1.75191e+07	1.57022e+07	1.60925e+07	1.88547e+07	1.9647e+07	High	High	High	High	High	High	1
High	Master Protein	A0A078JBG8	BnaC03g76330D protein OS=Brassica napus OX=3708 GN=BnaC03g76330D PE=3 SV=1	0	40.482	10	6	15	6	648	69.8	5.3	60	19.84	6	5		cytoplasm;membrane;mitochondrion	protein binding;structural molecule activity	Pf00038, Pf00769, Pf09731		GSBRNA2T00039302001				0	0	6.12612e+06	6.38458e+06	5.23423e+06	5.34871e+06	6.38569e+06	6.55756e+06	High	High	High	High	High	High	1
High	Master Protein	A0A078HY18	Ferredoxin--NADP reductase, chloroplastic OS=Brassica napus OX=3708 GN=BnaC07g14870D PE=3 SV=1	0	40.446	18	7	25	7	364	40.6	8.65	102	26.47	7	6	metabolic process		catalytic activity	Pf00175, Pf00667, Pf00970		GSBRNA2T00076633001				0	0	1.87349e+07	1.88708e+07	1.5017e+07	1.4245e+07	1.80933e+07	1.85362e+07	High	High	High	High	High	High	1
High	Master Protein	A0A078ITJ6	BnaCnng22210D protein OS=Brassica napus OX=3708 GN=BnaCnng22210D PE=4 SV=1	0	40.401	23	5	9	3	399	43.4	5.67	62	17.59	5	4		membrane	protein binding	Pf00400	106428036	GSBRNA2T00006824001	LOC106428036	C4	Protein processing in endoplasmic reticulum	1	0	655152	777347	626345	664493	783953	812635	High	High	High	High	High	High	1
High	Master Protein	A0A078GNY9	Pectin acetylesterase OS=Brassica napus OX=3708 GN=BnaA02g23870D PE=3 SV=1	0	40.39	17	5	13	3	391	42.2	8.51	54	19.93	5	4	cell organization and biogenesis	extracellular;membrane	catalytic activity	Pf03283	106437682	GSBRNA2T00035145001	LOC106437682	A2		0	2	8.69641e+06	9.42411e+06	7.92401e+06	8.09097e+06	8.99501e+06	9.0946e+06	High	High	High	High	High	High	1
High	Master Protein	A0A078ITJ0	Eukaryotic translation initiation factor 3 subunit G OS=Brassica napus OX=3708 GN=BnaCnng24840D PE=3 SV=1	0	40.386	27	6	17	6	294	32.4	8.7	71	16.63	6	4	cell organization and biogenesis;metabolic process;regulation of biological process	cytoplasm	RNA binding	Pf00076, Pf12353, Pf13893, Pf14259	106366897	GSBRNA2T00010442001	LOC106366897	C3	RNA transport	1	0	6.36956e+06	6.29895e+06	5.24142e+06	6.04189e+06	7.38572e+06	7.07633e+06	High	High	High	High	High	High	1
High	Master Protein	A0A078IP91	Chlorophyll a-b binding protein, chloroplastic OS=Brassica napus OX=3708 GN=BnaA09g56570D PE=3 SV=1	0	40.374	14	4	66	4	259	27.7	8.82	253	67.08	4	4	metabolic process	membrane		Pf00504		GSBRNA2T00008021001				0	0	1.58815e+07	1.73741e+07	1.90418e+07	2.15059e+07	2.33884e+07	2.60906e+07	High	High	High	High	High	High	1
High	Master Protein	A0A078F8K3	BnaA02g26510D protein OS=Brassica napus OX=3708 GN=BnaA02g26510D PE=3 SV=1	0	40.337	6	7	15	3	1217	134.3	6.06	57	21.19	7	7				Pf08623		GSBRNA2T00030821001				0	0	786620	797699	687611	806135	991458	1.04537e+06	High	High	High	High	High	High	1
High	Master Protein	A0A078H372	26S proteasome non-ATPase regulatory subunit 2 homolog OS=Brassica napus OX=3708 GN=BnaA07g00430D PE=3 SV=1	0	40.316	10	9	31	1	856	94.2	5.21	91	30.14	9	9	regulation of biological process	proteasome	enzyme regulator activity			GSBRNA2T00050742001				0	0							High	High	High	High	High	High	1
High	Master Protein	A0A078F9S0	Ubiquitin-like modifier-activating enzyme 5 OS=Brassica napus OX=3708 GN=BnaC05g03440D PE=3 SV=1	0	40.316	16	5	14	3	429	46.7	4.7	75	21.62	5	5			catalytic activity	Pf00899		GSBRNA2T00031903001				0	0	1.72641e+06	1.78872e+06	1.43273e+06	1.69798e+06	1.97253e+06	2.01205e+06	High	High	High	High	High	High	1
High	Master Protein	A0A078JKM2	Signal peptidase I OS=Brassica napus OX=3708 GN=BnaA06g01890D PE=3 SV=1	0	40.294	28	5	28	5	180	20	7.12	96	25.99	5	4	metabolic process	membrane	catalytic activity	Pf00717	106402543; 106447414; 106447432	GSBRNA2T00050986001; GSBRNA2T00069077001	LOC106402543; LOC106447414; LOC106447432	C6; A6	Protein export	1	0	8.93562e+06	9.70893e+06	8.12665e+06	8.9995e+06	1.02328e+07	1.09851e+07	High	High	High	High	High	High	1
High	Master Protein	A0A078FK85	Cellulase OS=Brassica napus OX=3708 GN=BnaC02g23570D PE=3 SV=1	0	40.153	12	5	16	1	422	46.4	7.47	71	23.7	5	5	metabolic process	membrane	catalytic activity	Pf00759		GSBRNA2T00077890001				0	0							High	High	High	High	High	High	1
High	Master Protein	A5GZU7	BnaA04g17570D protein OS=Brassica napus OX=3708 GN=C4H PE=2 SV=1	0	40.139	13	7	20	3	505	57.7	9.07	71	22.67	7	7	metabolic process		catalytic activity;metal ion binding	Pf00067	106348398	GSBRNA2T00043434001	LOC106348398	A6	Ubiquinone and other terpenoid-quinone biosynthesis; Metabolic pathways; Phenylpropanoid biosynthesis; Stilbenoid, diarylheptanoid and gingerol biosynthesis; Flavonoid biosynthesis; Biosynthesis of secondary metabolites; Phenylalanine metabolism	7	5	9.7049e+06	9.8727e+06	8.67398e+06	9.03449e+06	1.00038e+07	1.11947e+07	High	High	High	High	High	High	1
High	Master Protein	A0A078G9Q7	BnaA09g45030D protein OS=Brassica napus OX=3708 GN=BnaA09g45030D PE=4 SV=1	0	40.134	19	9	29	2	547	59.9	6.61	85	34.5	9	8	metabolic process		catalytic activity	Pf00155	106434914	GSBRNA2T00016260001	LOC106434914	A9	2-Oxocarboxylic acid metabolism; Arginine biosynthesis; Metabolic pathways; Carbon metabolism; Carbon fixation in photosynthetic organisms; Alanine, aspartate and glutamate metabolism; Biosynthesis of amino acids	7	0	4.47289e+06	4128405	3.34253e+06	3.7415e+06	4.91614e+06	4.96358e+06	High	High	High	High	High	High	1
High	Master Protein	A0A1P7XNA7	Flavanone 3-hydroxylase OS=Brassica napus OX=3708 GN=F3H PE=2 SV=1	0	40.126	22	6	34	1	358	40.2	5.54	116	48.14	6	5	metabolic process		catalytic activity;metal ion binding	Pf03171, Pf14226	106367722		LOC106367722	C8		0	5	1.31035e+07	1.35327e+07	1.16858e+07	1.22344e+07	1.39924e+07	1.49563e+07	High	High	High	High	High	High	1
High	Master Protein	A0A078GHH0	Acetyltransferase component of pyruvate dehydrogenase complex OS=Brassica napus OX=3708 GN=BnaA06g00560D PE=3 SV=1	0	40.112	14	7	41	2	555	60	6.87	151	36.42	7	6	metabolic process	organelle lumen	catalytic activity	Pf00198, Pf00364, Pf02817		GSBRNA2T00024590001				0	6	8.12237e+06	8.13867e+06	6.80289e+06	7.67804e+06	9.08163e+06	9.01617e+06	High	High	High	High	High	High	1
High	Master Protein	A0A078FD93	Gamma-ECS OS=Brassica napus OX=3708 GN=BnaA03g45730D PE=3 SV=1	0	40.079	14	8	30	2	517	57.9	6.8	85	23.65	8	6	metabolic process		catalytic activity	Pf04107		GSBRNA2T00048827001				0	7	1.29444e+07	1.36048e+07	1.0311e+07	1.20162e+07	1.32803e+07	1.42928e+07	High	High	High	High	High	High	1
High	Master Protein	A0A078GCX3	Dihydrolipoamide acetyltransferase component of pyruvate dehydrogenase complex OS=Brassica napus OX=3708 GN=BnaA04g05600D PE=3 SV=1	0	40.051	9	5	17	5	689	74.5	5.9	71	20.95	5	5	metabolic process		catalytic activity	Pf00198, Pf00364, Pf02817		GSBRNA2T00021738001				0	0	3.75498e+06	4.06395e+06	3.37109e+06	3.4181e+06	4.34824e+06	4.36555e+06	High	High	High	High	High	High	1
High	Master Protein	A0A078H1K3	AICAR transformylase OS=Brassica napus OX=3708 GN=BnaA05g08860D PE=3 SV=1	0	40.032	13	7	26	7	591	64.3	7.52	78	27.66	7	7	metabolic process		catalytic activity	Pf01808, Pf02142		GSBRNA2T00050271001				0	0	8.84154e+06	8.93718e+06	7.64145e+06	8.058e+06	8.85409e+06	9.94008e+06	High	High	High	High	High	High	1
High	Master Protein	A0A078G9R6	Clathrin light chain OS=Brassica napus OX=3708 GN=BnaA04g05890D PE=3 SV=1	0	40.019	30	7	21	7	256	28.8	5.87	71	25.2	7	7	transport	membrane	structural molecule activity	Pf01086	106445655	GSBRNA2T00021703001	LOC106445655	A4		0	0	2.65007e+07	2.80742e+07	2.44133e+07	2.5453e+07	2.85406e+07	2.94266e+07	High	High	High	High	High	High	1
High	Master Protein	A0A078GM66	BnaC09g42470D protein OS=Brassica napus OX=3708 GN=BnaC09g42470D PE=3 SV=1	0	39.961	9	8	22	8	1026	115.9	5.76	80	27.65	8	8	metabolic process		catalytic activity	Pf04564, Pf10408		GSBRNA2T00035211001				0	0	2.21038e+06	2.37027e+06	2.02724e+06	2.17078e+06	2.38629e+06	2.59841e+06	High	High	High	High	High	High	1
High	Master Protein	A0A078HKL5	Imidazole glycerol phosphate synthase hisHF OS=Brassica napus OX=3708 GN=BnaC04g31470D PE=3 SV=1	0	39.95	18	10	30	2	584	63.5	6.29	89	32.02	10	10	metabolic process	cytoplasm	catalytic activity	Pf00117, Pf00977, Pf01174, Pf02548, Pf07685		GSBRNA2T00064819001				0	0	819963	778431	665306	628462	807216	819276	High	High	High	High	High	High	1
High	Master Protein	A0A078FCV5	BnaC04g12350D protein OS=Brassica napus OX=3708 GN=BnaC04g12350D PE=3 SV=1	0	39.916	13	6	16	6	490	56.8	8.95	69	16.73	6	5	metabolic process	membrane	catalytic activity;metal ion binding	Pf00067	106440494	GSBRNA2T00061224001	LOC106440494	C4	Diterpenoid biosynthesis; Biosynthesis of secondary metabolites; Metabolic pathways	3	0	5.45817e+06	5.97193e+06	5.40762e+06	5.79821e+06	7.11848e+06	7.26217e+06	High	High	High	High	High	High	1
High	Master Protein	Q8L588	Cysteine proteinase OS=Brassica napus OX=3708 GN=CysP1 PE=2 SV=1	0	39.911	17	5	59	5	343	37.6	8.69	221	57.54	5	4	metabolic process		catalytic activity	Pf00112, Pf08246	106436362	GSBRNA2T00128547001	LOC106436362	C8		0	0	2.57144e+08	2.62956e+08	2.10026e+08	1.84498e+08	2.24789e+08	2.31707e+08	High	High	High	High	High	High	1
High	Master Protein	A0A078I7D4	Aminopeptidase OS=Brassica napus OX=3708 GN=BnaA08g11910D PE=3 SV=1	0	39.911	7	6	29	1	835	93.8	5.1	113	27.91	6	6	metabolic process		catalytic activity;metal ion binding	Pf01433, Pf11838, Pf13485		GSBRNA2T00081279001				0	6	1.30505e+07	1.33959e+07	1.16102e+07	1.11646e+07	1.328e+07	1.62297e+07	High	High	High	High	High	High	1
High	Master Protein	A0A078J9Q1	UDP-arabinopyranose mutase OS=Brassica napus OX=3708 GN=BnaAnng16810D PE=3 SV=1	0	39.905	14	4	20	2	357	40.5	5.92	104	19.15	4	3	metabolic process		catalytic activity	Pf03214		GSBRNA2T00029634001				0	2	3.57733e+06	3.5775e+06	3.07692e+06	3.37595e+06	3.59825e+06	4.11927e+06	High	High	High	High	High	High	1
High	Master Protein	A0A078HA16	BnaA01g14420D protein OS=Brassica napus OX=3708 GN=BnaA01g14420D PE=4 SV=1	0	39.894	22	6	18	6	313	33.8	7.87	69	24.87	6	5	metabolic process		catalytic activity	Pf06325, Pf07109, Pf08241, Pf08242, Pf12847, Pf13489, Pf13649, Pf13847	106442518	GSBRNA2T00056378001	LOC106442518	A1	Porphyrin and chlorophyll metabolism; Metabolic pathways; Biosynthesis of secondary metabolites	3	0	4.38337e+06	4.84012e+06	3.75212e+06	3.97969e+06	4.55318e+06	5.04207e+06	High	High	High	High	High	High	1
High	Master Protein	A0A078IAH7	Transmembrane 9 superfamily member OS=Brassica napus OX=3708 GN=BnaA01g23150D PE=3 SV=1	0	39.892	8	5	28	1	575	65.6	7.62	94	29.54	5	5		membrane		Pf02990		GSBRNA2T00083400001				0	0	1.91231e+06	2.55896e+06	2.00479e+06	2.79164e+06	2.36165e+06	3.22572e+06	High	High	High	High	High	High	1
High	Master Protein	A0A068F6Z0	Polyadenylate-binding protein OS=Brassica napus OX=3708 GN=PABP8 PE=3 SV=1	0	39.876	10	5	16	3	606	66.3	6.83	80	26.81	5	5		cytoplasm	RNA binding	Pf00076, Pf00658, Pf08777, Pf13893, Pf14259	106358331		LOC106358331	A1		0	0	2.18879e+06	2.18073e+06	1.81907e+06	1.70502e+06	2.03759e+06	2.11366e+06	High	High	High	High	High	High	1
High	Master Protein	A0A078FXI3	BnaC04g03350D protein OS=Brassica napus OX=3708 GN=BnaC04g03350D PE=3 SV=1	0	39.757	27	7	36	3	242	28	9.95	119	26.04	7	6				Pf00327, Pf08079	106396077; 106396671; 106396918	GSBRNA2T00002227001	LOC106396077; LOC106396671; LOC106396918	A5; C4	Ribosome	1	4	3.38576e+07	3.30866e+07	3.48629e+07	3.52411e+07	4.06354e+07	4.58081e+07	High	High	High	High	High	High	1
High	Master Protein	A0A078IH98	BnaA09g00250D protein OS=Brassica napus OX=3708 GN=BnaA09g00250D PE=4 SV=1	0	39.733	11	6	27	6	461	48.5	5.22	88	32.1	6	5						GSBRNA2T00091196001				0	0	4.41409e+07	4.90037e+07	3.93228e+07	4.39122e+07	5.31234e+07	5.45215e+07	High	High	High	High	High	High	1
High	Master Protein	P93063	BnaA06g01430D protein OS=Brassica napus OX=3708 GN=BnaA06g01430D PE=2 SV=1	0	39.715	14	4	13	4	383	42.6	7.23	63	20.25	4	4			catalytic activity	Pf00657	106345818	GSBRNA2T00003346001	LOC106345818	A6		0	0	3.38281e+06	3.68913e+06	2.7555e+06	4.23669e+06	5.19403e+06	5.27428e+06	High	High	High	High	High	High	1
High	Master Protein	O49809	Glyoxysomal fatty acid beta-oxidation multifunctional protein MFP-a OS=Brassica napus OX=3708 PE=2 SV=2	0	39.708	11	6	20	1	725	79	9.06	77	23.14	6	6	metabolic process		catalytic activity	Pf00378, Pf00725, Pf02737	106389027		LOC106389027	A3	Biosynthesis of secondary metabolites; Fatty acid degradation; Fatty acid metabolism; Metabolic pathways; alpha-Linolenic acid metabolism	5	0	665240	610138	591421	557691	638679	665773	High	High	High	High	High	High	1
High	Master Protein	A0A078F8H1	3-hydroxyacyl-CoA dehydrogenase OS=Brassica napus OX=3708 GN=BnaC03g34950D PE=3 SV=1	0	39.697	11	6	18	1	726	79.1	9.14	69	21.24	6	6	metabolic process		catalytic activity	Pf00378, Pf00725, Pf02737		GSBRNA2T00125276001				0	5	6.9012e+06	6.89549e+06	6.79566e+06	6.29663e+06	6.98081e+06	7.53315e+06	High	High	High	High	High	High	1
High	Master Protein	A0A078FMF2	Neutral ceramidase OS=Brassica napus OX=3708 GN=BnaA08g28940D PE=3 SV=1	0	39.607	14	10	22	7	781	87.5	8.18	59	23	10	10				Pf04734		GSBRNA2T00089797001				0	3	4.86033e+06	4.84101e+06	4.55245e+06	4.92021e+06	5.16832e+06	5.53309e+06	High	High	High	High	High	High	1
High	Master Protein	A0A078I9M1	BnaC05g18910D protein OS=Brassica napus OX=3708 GN=BnaC05g18910D PE=3 SV=1	0	39.599	23	5	15	4	346	37.8	4.93	74	20.41	5	4	metabolic process		catalytic activity	Pf01564, Pf05175, Pf05430, Pf13578, Pf13659		GSBRNA2T00087855001				0	1	4.10478e+06	4.25228e+06	3.61199e+06	3.67944e+06	4.19187e+06	4.48611e+06	High	High	High	High	High	High	1
High	Master Protein	A0A078K3Z1	Histone H2B OS=Brassica napus OX=3708 GN=BnaCnng77830D PE=3 SV=1	0	39.513	27	5	41	2	153	16.5	10.02	127	27.14	5	4		chromosome;nucleus	DNA binding;protein binding	Pf00125		GSBRNA2T00029937001				0	5	9.45066e+07	1.01885e+08	8.62838e+07	8.41582e+07	9.80503e+07	1.09082e+08	High	High	High	High	High	High	1
High	Master Protein	A0A078JP05	BnaCnng55070D protein OS=Brassica napus OX=3708 GN=BnaCnng55070D PE=4 SV=1	0	39.51	33	4	17	3	129	14.1	6.38	77	28.06	3	4			catalytic activity	Pf01230, Pf11969		GSBRNA2T00126207001; GSBRNA2T00063616001				0	0	4.17911e+06	4.45451e+06	3.68476e+06	4.55026e+06	5.71909e+06	5.40635e+06	High	High	High	High	High	High	1
High	Master Protein	A0A078ILF0	N-acetyl-glutamate semialdehyde dehydrogenase OS=Brassica napus OX=3708 GN=BnaC09g51280D PE=3 SV=1	0	39.405	13	4	17	4	394	43.4	8.47	81	17.41	4	3	metabolic process	cytoplasm	catalytic activity;nucleotide binding;protein binding	Pf01118, Pf02774	106358554	GSBRNA2T00094037001	LOC106358554	C9	2-Oxocarboxylic acid metabolism; Biosynthesis of amino acids; Arginine biosynthesis; Biosynthesis of secondary metabolites; Metabolic pathways	5	0	2.59132e+06	2.89578e+06	2.17948e+06	2.32804e+06	2.97225e+06	2.84541e+06	High	High	High	High	High	High	1
High	Master Protein	A0A078JRA5	BnaAnng25690D protein OS=Brassica napus OX=3708 GN=BnaAnng25690D PE=3 SV=1	0	39.393	34	3	38	2	90	10	5.5	150	44.17	3	3				Pf00887	106367157	GSBRNA2T00068322001	LOC106367157	A9		0	2	8.65898e+06	8.26285e+06	1.06418e+07	1.18404e+07	1.35131e+07	1.62268e+07	High	High	High	High	High	High	1
High	Master Protein	A0A078IIT4	Dihydrothymine dehydrogenase OS=Brassica napus OX=3708 GN=BnaC01g34640D PE=3 SV=1	0	39.307	19	7	20	7	424	46.7	6.38	80	22.46	7	6	metabolic process	cytoplasm	catalytic activity	Pf01180		GSBRNA2T00093888001				0	0	1.06081e+07	1.10866e+07	9.04107e+06	1.02643e+07	1.20913e+07	1.34545e+07	High	High	High	High	High	High	1
High	Master Protein	A0A078I1H0	BnaC05g47280D protein OS=Brassica napus OX=3708 GN=BnaC05g47280D PE=3 SV=1	0	39.272	25	3	52	2	140	15	10.36	205	68.42	3	2	metabolic process	ribosome	structural molecule activity	Pf00238		GSBRNA2T00075660001				0	2	4.13083e+07	3.75802e+07	3.14968e+07	3.712e+07	4.02132e+07	4.86386e+07	High	High	High	High	High	High	1
High	Master Protein	A0A078I001	BnaAnng07140D protein OS=Brassica napus OX=3708 GN=BnaAnng07140D PE=4 SV=1	0	39.247	22	4	18	2	262	28.9	5.26	76	30.22	4	4				Pf00504		GSBRNA2T00076665001				0	2	4.41728e+06	4.53942e+06	4.20447e+06	4.01579e+06	5.19185e+06	5.1773e+06	High	High	High	High	High	High	1
High	Master Protein	X2C3V9	BnaA09g05220D protein OS=Brassica napus OX=3708 GN=CPK12.1 PE=2 SV=1	0	39.221	11	4	15	2	486	54.9	5.47	74	25.03	4	4	metabolic process	membrane	catalytic activity;metal ion binding;nucleotide binding	Pf00036, Pf00069, Pf06293, Pf07714, Pf13202, Pf13405, Pf13499, Pf13833, Pf14531	106366044	GSBRNA2T00094747001	LOC106366044	A1	Plant-pathogen interaction	1	0	238470	264791	227984	251183	259122	298451	High	High	High	High	High	High	1
High	Master Protein	A0A078HB62	Histidine--tRNA ligase OS=Brassica napus OX=3708 GN=BnaA01g32910D PE=3 SV=1	0	39.136	7	7	24	7	856	93.8	6.09	70	28.42	7	7	metabolic process	cytoplasm	catalytic activity;nucleotide binding	Pf00587, Pf03129, Pf13393		GSBRNA2T00057269001				0	0	8.00851e+06	8.35008e+06	7.72492e+06	7.12044e+06	7.94447e+06	8.59252e+06	High	High	High	High	High	High	1
High	Master Protein	A0A078GM99	BnaC09g42220D protein OS=Brassica napus OX=3708 GN=BnaC09g42220D PE=4 SV=1	0	39.072	15	4	28	2	335	38	6.11	116	29.3	4	3	metabolic process		catalytic activity	Pf03214		GSBRNA2T00035240001				0	0	4.58831e+06	4.66189e+06	3.84699e+06	3.91733e+06	4.3659e+06	4.81396e+06	High	High	High	High	High	High	1
High	Master Protein	A0A078IJJ1	BnaA09g55270D protein OS=Brassica napus OX=3708 GN=BnaA09g55270D PE=3 SV=1	0	39.066	22	4	20	4	202	22.4	9.61	95	29.24	4	4	transport		catalytic activity;transporter activity	Pf01813		GSBRNA2T00092639001				0	0	1.01092e+07	1.13884e+07	8.89253e+06	8.12612e+06	9.91956e+06	9.97906e+06	High	High	High	High	High	High	1
High	Master Protein	A0A078II14	BnaCnng17680D protein OS=Brassica napus OX=3708 GN=BnaCnng17680D PE=4 SV=1	0	39.034	20	9	19	9	558	60.5	6.07	64	17.19	9	6			protein binding	Pf00400		GSBRNA2T00093466001				0	0	8.93341e+06	8.96075e+06	7.09309e+06	7.66845e+06	9.02766e+06	1.00383e+07	High	High	High	High	High	High	1
High	Master Protein	A0A078FRK5	Histone H2B OS=Brassica napus OX=3708 GN=BnaC04g15480D PE=3 SV=1	0	39.022	37	5	32	2	148	16.2	10.02	110	18.83	5	4		chromosome;nucleus	DNA binding;protein binding	Pf00125	106406561	GSBRNA2T00090046001	LOC106406561	C6		0	0							High	High	High	High	High	High	1
High	Master Protein	A0A078J0V4	BnaC04g51960D protein OS=Brassica napus OX=3708 GN=BnaC04g51960D PE=4 SV=1	0	38.964	8	5	24	2	939	104.2	6.28	96	22.02	5	4	metabolic process		catalytic activity	Pf00326, Pf01738, Pf12695	106404478	GSBRNA2T00016784001	LOC106404478	C4		0	4	2.73817e+06	2.89577e+06	2.41338e+06	2.54896e+06	2.78556e+06	3.0957e+06	High	High	High	High	High	High	1
High	Master Protein	A0A078FUA8	Sucrose synthase OS=Brassica napus OX=3708 GN=BnaC09g37040D PE=3 SV=1	0	38.953	12	9	27	8	805	92.2	6.11	81	33.7	9	9	metabolic process		catalytic activity	Pf00534, Pf00862, Pf01012, Pf13524	106376588	GSBRNA2T00094365001	LOC106376588		Metabolic pathways; Starch and sucrose metabolism	2	1	1.32907e+07	1.41955e+07	1.14049e+07	1.04686e+07	1.28773e+07	1.39354e+07	High	High	High	High	High	High	1
High	Master Protein	A0A078HM48	3-isopropylmalate dehydrogenase OS=Brassica napus OX=3708 GN=BnaC02g22980D PE=3 SV=1	0	38.928	17	6	19	2	406	43.4	6.71	69	26.94	6	5	metabolic process	cytoplasm	catalytic activity;metal ion binding;nucleotide binding	Pf00180		GSBRNA2T00066419001				0	4	2.85259e+07	2.98664e+07	2.32053e+07	2.62959e+07	3.02682e+07	3.23663e+07	High	High	High	High	High	High	1
High	Master Protein	P17333	Napin OS=Brassica napus OX=3708 GN=NAP1 PE=2 SV=1	0	38.862	22	4	49	1	180	20.3	7.25	188	68.95	4	4					106444749		LOC106444749	A1		0	0	2.61805e+06	2.64452e+06	2.70385e+06	3.42808e+06	3.93325e+06	4.1117e+06	High	High	High	High	High	High	1
High	Master Protein	A0A078G2G2	Shikimate dehydrogenase OS=Brassica napus OX=3708 GN=BnaAnng03180D PE=3 SV=1	0	38.847	11	6	24	4	596	64.9	6.55	73	28.3	6	5	metabolic process		catalytic activity;nucleotide binding	Pf01487, Pf01488, Pf08501		GSBRNA2T00006032001				0	2	9.66702e+06	9.61338e+06	8.13539e+06	8.36342e+06	1.00152e+07	1.09217e+07	High	High	High	High	High	High	1
High	Master Protein	A0A078HSR8	BnaC05g43270D protein OS=Brassica napus OX=3708 GN=BnaC05g43270D PE=4 SV=1	0	38.81	30	7	18	2	266	29.8	5.31	61	21.96	7	6		membrane	protein binding	Pf05739		GSBRNA2T00073237001				0	5	5.945e+06	5.9864e+06	5.19632e+06	5.43683e+06	6.151e+06	6.68932e+06	High	High	High	High	High	High	1
High	Master Protein	P10352	Acyl carrier protein, chloroplastic OS=Brassica napus OX=3708 GN=ACL1.A1 PE=2 SV=2	0	38.766	21	2	24	2	134	14.6	5.15	126	45.28	2	2	metabolic process			Pf00550, Pf14573	106453012		LOC106453012	C5		0	0	2.36781e+07	2.40383e+07	1.9146e+07	1.33845e+07	1.65387e+07	1.70466e+07	High	High	High	High	High	High	1
High	Master Protein	A0A078JK10	BnaA07g38730D protein OS=Brassica napus OX=3708 GN=BnaA07g38730D PE=3 SV=1	0	38.755	8	7	19	6	772	87.8	5.15	55	24.79	7	6	cellular component movement;metabolic process;transport		transporter activity	Pf01496, Pf03962, Pf04111, Pf13851		GSBRNA2T00066952001				0	1	7.93603e+06	8.82588e+06	7.11881e+06	7.21639e+06	7.91398e+06	9.41915e+06	High	High	High	High	High	High	1
High	Master Protein	A0A078FII3	Asparagine--tRNA ligase OS=Brassica napus OX=3708 GN=BnaC03g13340D PE=3 SV=1	0	38.717	10	5	17	3	575	63.8	5.68	75	28.87	5	5	metabolic process	cytoplasm	catalytic activity;nucleotide binding	Pf00152, Pf00458, Pf01336		GSBRNA2T00060748001				0	0	4.18466e+06	4.21053e+06	3.32991e+06	2.78614e+06	3.32355e+06	3.50201e+06	High	High	High	High	High	High	1
High	Master Protein	A0A078IA58	BnaCnng13700D protein OS=Brassica napus OX=3708 GN=BnaCnng13700D PE=4 SV=1	0	38.681	4	7	18	1	2154	230.8	5.36	63	20.29	7	5			protein binding	Pf00168, Pf00514		GSBRNA2T00083526001				0	6	1.71664e+06	1.72632e+06	1.48815e+06	1.60423e+06	1.86625e+06	1.96857e+06	High	High	High	High	High	High	1
High	Master Protein	A0S5Z6	Flavanone 3-hydroxylase 1 OS=Brassica napus OX=3708 GN=F3H-1 PE=2 SV=1	0	38.654	22	6	34	1	358	40.1	5.64	117	48.27	6	5	metabolic process		catalytic activity;metal ion binding	Pf03171, Pf14226	106367722; 111197703	GSBRNA2T00129251001	LOC106367722; LOC111197703	C8; A9		0	0	629816	660704	558914	623565	716320	735469	High	High	High	High	High	High	1
High	Master Protein	A0A078J542	BnaA05g35220D protein OS=Brassica napus OX=3708 GN=BnaA05g35220D PE=4 SV=1	0	38.547	16	3	14	2	239	25.9	5.97	74	23.1	3	3	metabolic process		catalytic activity	Pf01738, Pf02230, Pf05448, Pf12695, Pf12697		GSBRNA2T00033790001				0	0	2.84085e+06	3.04978e+06	2.58685e+06	3.03209e+06	3.21298e+06	3.45017e+06	High	High	High	High	High	High	1
High	Master Protein	A0A078JIC8	BnaC02g48400D protein OS=Brassica napus OX=3708 GN=BnaC02g48400D PE=3 SV=1	0	38.523	6	6	16	2	1315	144.8	5.71	53	19.28	5	5	metabolic process;regulation of biological process;response to stimulus		catalytic activity;nucleotide binding	Pf00072, Pf00686, Pf01326		GSBRNA2T00044235001				0	0	89330.7	108852	87483.2	88652.6	105369	118497	High	High	High	High	High	High	1
High	Master Protein	A0A078GCU5	BnaC03g22980D protein OS=Brassica napus OX=3708 GN=BnaC03g22980D PE=3 SV=1	0	38.52	19	6	20	3	354	40.1	9.1	75	25.19	6	6	metabolic process		catalytic activity;metal ion binding	Pf00067		GSBRNA2T00019050001				0	0	3.1848e+06	3.25305e+06	2.61736e+06	2.73305e+06	2.86299e+06	3.00533e+06	High	High	High	High	High	High	1
High	Master Protein	A0A078GX75	BnaC05g31880D protein OS=Brassica napus OX=3708 GN=BnaC05g31880D PE=2 SV=1	0	38.516	8	3	27	1	466	51.7	6.37	102	37.77	3	3	metabolic process		catalytic activity	Pf01650	106399280	GSBRNA2T00043692001	LOC106399280	C5		0	2	1.45221e+07	1.64762e+07	1.07683e+07	1.01057e+07	1.26914e+07	1.41339e+07	High	High	High	High	High	High	1
High	Master Protein	A0A078HHK6	Malic enzyme OS=Brassica napus OX=3708 GN=BnaA09g08320D PE=3 SV=1	0	38.482	10	6	26	6	618	69	5.95	96	29.54	6	6	metabolic process		catalytic activity;metal ion binding;nucleotide binding	Pf00390, Pf03949	106366363	GSBRNA2T00063694001	LOC106366363	A9	Pyruvate metabolism; Carbon fixation in photosynthetic organisms; Carbon metabolism; Metabolic pathways	4	0	1.07648e+07	1.13452e+07	8.96303e+06	1.07528e+07	1.24108e+07	1.38272e+07	High	High	High	High	High	High	1
High	Master Protein	A0A078J3I9	BnaC04g52130D protein OS=Brassica napus OX=3708 GN=BnaC04g52130D PE=3 SV=1	0	38.371	7	7	26	7	971	108.4	5.74	92	30.67	7	5	transport	nucleus	protein binding	Pf03378, Pf03810, Pf08389, Pf08506		GSBRNA2T00020215001				0	0	6.87704e+06	6.27665e+06	5.90132e+06	5.98293e+06	7.17448e+06	8.01474e+06	High	High	High	High	High	High	1
High	Master Protein	A0A078GCU6	BnaA04g05950D protein OS=Brassica napus OX=3708 GN=BnaA04g05950D PE=3 SV=1	0	38.36	15	6	24	6	439	47.9	8.29	92	31.28	6	4	metabolic process		catalytic activity;nucleotide binding	Pf00441, Pf02770, Pf02771	106445649	GSBRNA2T00021694001	LOC106445649	A4	Biosynthesis of secondary metabolites; alpha-Linolenic acid metabolism; Fatty acid metabolism; Fatty acid degradation; Metabolic pathways; Biosynthesis of unsaturated fatty acids; Peroxisome	7	0	2.93989e+07	3.03705e+07	2.57636e+07	2.45758e+07	29840038	3.10932e+07	High	High	High	High	High	High	1
High	Master Protein	A0A078IK69	BnaA09g54850D protein OS=Brassica napus OX=3708 GN=BnaA09g54850D PE=4 SV=1	0	38.296	19	3	12	3	297	33.6	6.4	75	25.55	3	3			protein binding	Pf13409, Pf13410, Pf13417	106415040	GSBRNA2T00003472001	LOC106415040	A9	Glutathione metabolism	1	0	828013	882745	715468	814377	934208	943002	High	High	High	High	High	High	1
High	Master Protein	A0A078G1F3	Peroxidase OS=Brassica napus OX=3708 GN=BnaC01g31810D PE=3 SV=1	0	38.276	21	6	40	6	329	36	9.42	143	44.8	6	4	metabolic process;response to stimulus	extracellular	antioxidant activity;catalytic activity;metal ion binding	Pf00141		GSBRNA2T00006656001				0	0	4.77034e+07	5.08979e+07	4.5065e+07	3.40371e+07	4.0572e+07	4.18812e+07	High	High	High	High	High	High	1
High	Master Protein	A0A078I1V3	BnaC09g50550D protein OS=Brassica napus OX=3708 GN=BnaC09g50550D PE=4 SV=1	0	38.226	21	6	24	2	338	36.4	6.28	90	23.37	6	6			RNA binding	Pf00013, Pf13014	106433128	GSBRNA2T00080907001	LOC106433128	C9		0	5	1.38112e+07	1.39918e+07	1.14237e+07	1.26354e+07	1.48147e+07	1.57966e+07	High	High	High	High	High	High	1	Acetyl [N-Term]
High	Master Protein	A0A078FQR2	BnaA08g27700D protein OS=Brassica napus OX=3708 GN=BnaA08g27700D PE=4 SV=1	0	38.178	7	5	21	2	807	89.8	5.08	80	29.61	5	5	metabolic process	nucleus	protein binding	Pf05843		GSBRNA2T00089656001				0	0	6.11209e+06	6.03264e+06	4.91653e+06	5.87253e+06	6.48042e+06	6.78542e+06	High	High	High	High	High	High	1
High	Master Protein	A0A078IV21	BnaA09g56450D protein OS=Brassica napus OX=3708 GN=BnaA09g56450D PE=4 SV=1	0	38.162	8	6	12	5	990	109.6	7.85	59	16.9	6	5	metabolic process	membrane	catalytic activity;metal ion binding;nucleotide binding	Pf00069, Pf07714, Pf08488, Pf12260, Pf13947		GSBRNA2T00008007001				0	1	1.79096e+06	1.96317e+06	1.59816e+06	1.66707e+06	1.9682e+06	2.0125e+06	High	High	High	High	High	High	1
High	Master Protein	M4J9S1	Alcohol dehydrogenase OS=Brassica napus OX=3708 PE=3 SV=1	0	38.093	16	5	18	5	379	41.1	6.42	69	26.3	5	5	metabolic process		catalytic activity;metal ion binding	Pf00107, Pf08240	106392161		LOC106392161	C6		0	0	2.80319e+07	3.37014e+07	2.50526e+07	2.88317e+07	3.33006e+07	3.68059e+07	High	High	High	High	High	High	1
High	Master Protein	A0A078IC98	BnaC05g13450D protein OS=Brassica napus OX=3708 GN=BnaC05g13450D PE=4 SV=1	0	38.054	18	9	31	2	540	59.5	6.7	89	31.44	9	8	metabolic process		catalytic activity	Pf00155	106447239	GSBRNA2T00091180001	LOC106447239	C5	Carbon fixation in photosynthetic organisms; Biosynthesis of amino acids; Alanine, aspartate and glutamate metabolism; 2-Oxocarboxylic acid metabolism; Metabolic pathways; Arginine biosynthesis; Carbon metabolism	7	8	2.63448e+07	2.46804e+07	2.25893e+07	2.20036e+07	2.46196e+07	2.73261e+07	High	High	High	High	High	High	1
High	Master Protein	A0A078IKV9	BnaA03g47440D protein OS=Brassica napus OX=3708 GN=BnaA03g47440D PE=4 SV=1	0	38.019	11	5	11	3	633	69.6	5.91	57	17.03	5	4				Pf07910		GSBRNA2T00093625001				0	2	1.29534e+06	1.30948e+06	1.12197e+06	1.20435e+06	1.3878e+06	1.51747e+06	High	High	High	High	High	High	1
High	Master Protein	A0A078HSI1	ATP:AMP phosphotransferase OS=Brassica napus OX=3708 GN=BnaA06g22680D PE=3 SV=1	0	37.993	19	4	29	1	240	26.4	8.12	129	34.74	4	4	metabolic process		catalytic activity;nucleotide binding	Pf00406, Pf05191, Pf06414, Pf13207		GSBRNA2T00073134001				0	2	2.82916e+06	2.7978e+06	2.41122e+06	2.6378e+06	2.82269e+06	3.23417e+06	High	High	High	High	High	High	1
High	Master Protein	Q84JL9	NAD-dependent isocitrate dehydrogenase beta subunit OS=Brassica napus OX=3708 PE=2 SV=1	0	37.97	16	5	12	5	367	39.7	8.4	54	15.88	5	4	metabolic process		catalytic activity	Pf00180	106421820		LOC106421820	C7		0	0	670956	649643	507644	637738	767271	787360	High	High	High	High	High	High	1
High	Master Protein	A0A078J785	Phosphoribulokinase OS=Brassica napus OX=3708 GN=BnaA09g54020D PE=3 SV=1	0	37.955	16	6	34	6	397	44.4	5.77	128	30.6	6	5	metabolic process		catalytic activity;nucleotide binding	Pf00485	106435161	GSBRNA2T00025724001	LOC106435161	A9	Carbon metabolism; Metabolic pathways; Carbon fixation in photosynthetic organisms	3	0	2.2082e+07	2.36287e+07	1.99137e+07	1.96193e+07	2.2374e+07	2.39662e+07	High	High	High	High	High	High	1
High	Master Protein	A0A078H525	Coproporphyrinogen oxidase OS=Brassica napus OX=3708 GN=BnaA09g50920D PE=3 SV=1	0	37.923	23	7	24	3	386	43.9	6.71	66	32.54	6	7	metabolic process		catalytic activity	Pf01218		GSBRNA2T00052485001				0	0	5.41262e+06	5.5693e+06	4.48021e+06	4.60121e+06	5.44227e+06	5.73399e+06	High	High	High	High	High	High	1
High	Master Protein	A0A078JXJ1	BnaCnng67200D protein (Fragment) OS=Brassica napus OX=3708 GN=BnaCnng67200D PE=4 SV=1	0	37.902	15	6	13	6	552	62	5.59	74	18.1	6	5	metabolic process		catalytic activity	Pf00128, Pf02922		GSBRNA2T00097325001				0	0	2.87077e+06	3.06359e+06	2.29553e+06	2.58679e+06	2.84767e+06	3.37498e+06	High	High	High	High	High	High	1
High	Master Protein	A0A078H905	Sulfurtransferase OS=Brassica napus OX=3708 GN=BnaC05g12550D PE=4 SV=1	0	37.881	18	6	12	5	379	41.6	7.52	56	16.4	6	4			catalytic activity	Pf00581	106367455	GSBRNA2T00054161001	LOC106367455	C7	Metabolic pathways; Sulfur relay system; Sulfur metabolism; Cysteine and methionine metabolism	4	1	4.20663e+06	4.00495e+06	3.73003e+06	3.8267e+06	4.47344e+06	4.39629e+06	High	High	High	High	High	High	1
High	Master Protein	A0A078IEF0	Acetohydroxy-acid reductoisomerase OS=Brassica napus OX=3708 GN=BnaA09g55140D PE=3 SV=1	0	37.855	22	7	45	7	356	37.7	7.9	157	34.11	7	5	metabolic process		catalytic activity	Pf01450, Pf07991		GSBRNA2T00092625001				0	0	7.39806e+07	7.39844e+07	6.38201e+07	6.72602e+07	7.45106e+07	8.85192e+07	High	High	High	High	High	High	1
High	Master Protein	A0A078J1P7	BnaC06g41790D protein OS=Brassica napus OX=3708 GN=BnaC06g41790D PE=3 SV=1	0	37.767	9	8	23	2	1035	114.3	9.5	71	26.59	8	7	regulation of biological process		protein binding	Pf02170, Pf02171, Pf08699		GSBRNA2T00017472001				0	0	1.2138e+06	1.34759e+06	1.09044e+06	1.08706e+06	1.28284e+06	1.35241e+06	High	High	High	High	High	High	1
High	Master Protein	A0A078H6W6	BnaA01g14180D protein OS=Brassica napus OX=3708 GN=BnaA01g14180D PE=4 SV=1	0	37.684	24	8	25	3	387	44.1	5.57	94	34.36	8	7	regulation of biological process		enzyme regulator activity;protein binding	Pf01399, Pf10602	106442360	GSBRNA2T00056354001	LOC106442360	A1	Proteasome	1	5	1.09826e+07	1.16121e+07	9.66661e+06	10752116	1.21153e+07	1.31603e+07	High	High	High	High	High	High	1
High	Master Protein	A0A078HS60	Transmembrane 9 superfamily member OS=Brassica napus OX=3708 GN=BnaC02g00060D PE=3 SV=1	0	37.665	7	4	19	3	642	73.8	7.59	95	32.47	4	3		membrane		Pf02990		GSBRNA2T00069049001				0	0	3.42962e+06	3.6881e+06	3.09763e+06	2.90464e+06	3.7252e+06	3.67503e+06	High	High	High	High	High	High	1
High	Master Protein	A0A078HDW9	BnaA06g09730D protein OS=Brassica napus OX=3708 GN=BnaA06g09730D PE=3 SV=1	0	37.647	44	4	24	4	98	10.8	8.44	112	34.61	4	4	metabolic process	cytoplasm	nucleotide binding	Pf00166	106377058; 106377059; 106377060	GSBRNA2T00062196001	LOC106377058; LOC106377059; LOC106377060	A6		0	0	4.52352e+06	4594759	3.67074e+06	4.24574e+06	4.71703e+06	5.18329e+06	High	High	High	High	High	High	1
High	Master Protein	A0A078FU28	Chorismate synthase OS=Brassica napus OX=3708 GN=BnaA08g02980D PE=3 SV=1	0	37.628	14	7	21	1	441	47.7	8.28	95	26.07	7	6	metabolic process		catalytic activity	Pf01264	106360510	GSBRNA2T00091037001	LOC106360510	A8	Biosynthesis of amino acids; Metabolic pathways; Biosynthesis of secondary metabolites; Phenylalanine, tyrosine and tryptophan biosynthesis	4	7	5.09257e+06	5.22942e+06	4.23884e+06	4.41256e+06	4.96413e+06	5.09681e+06	High	High	High	High	High	High	1
High	Master Protein	A0A078JSG6	BnaC08g48460D protein OS=Brassica napus OX=3708 GN=BnaC08g48460D PE=4 SV=1	0	37.611	13	6	16	3	514	55.3	5.94	68	20.7	6	5	metabolic process		catalytic activity	Pf00501, Pf13193		GSBRNA2T00087007001				0	3	2.5236e+06	2.56205e+06	2.18164e+06	2.54551e+06	3.06385e+06	3.2887e+06	High	High	High	High	High	High	1
High	Master Protein	A0A078FXH9	Methylenetetrahydrofolate reductase OS=Brassica napus OX=3708 GN=BnaC04g03400D PE=3 SV=1	0	37.608	11	7	27	6	594	66.5	5.57	90	28.26	7	6	metabolic process		catalytic activity	Pf02219		GSBRNA2T00002219001				0	1	3.34058e+07	3.75539e+07	3.06928e+07	2.67083e+07	3.05444e+07	3.40057e+07	High	High	High	High	High	High	1
High	Master Protein	A0A078F3M1	BnaA03g18340D protein OS=Brassica napus OX=3708 GN=BnaA03g18340D PE=4 SV=1	0	37.43	23	6	19	6	326	36.3	6.37	92	28.27	6	5				Pf14200		GSBRNA2T00124791001				0	0	8.64634e+06	9.05159e+06	7114954	7.28707e+06	8.60146e+06	9.04211e+06	High	High	High	High	High	High	1
High	Master Protein	A0A078FE65	BnaCnng03040D protein OS=Brassica napus OX=3708 GN=BnaCnng03040D PE=4 SV=1	0	37.415	11	5	14	5	484	53.5	6.33	53	20.15	5	5			protein binding	Pf00226, Pf13414, Pf13432	106411304	GSBRNA2T00032317001	LOC106411304		Protein processing in endoplasmic reticulum	1	0	6.23732e+06	6.62966e+06	5.20198e+06	5.86141e+06	6.8061e+06	7.12018e+06	High	High	High	High	High	High	1
High	Master Protein	A0A078IBE5	BnaA07g10470D protein OS=Brassica napus OX=3708 GN=BnaA07g10470D PE=4 SV=1	0	37.398	31	5	14	2	185	20.4	4.28	69	20.46	5	4		mitochondrion	catalytic activity;transporter activity	Pf02297	106358170	GSBRNA2T00085937001	LOC106358170	A7	Metabolic pathways; Oxidative phosphorylation	2	3	6.32443e+06	6.43424e+06	5.63671e+06	5.69132e+06	6.52195e+06	7.08486e+06	High	High	High	High	High	High	1
High	Master Protein	A0A078J4G0	BnaCnng31920D protein OS=Brassica napus OX=3708 GN=BnaCnng31920D PE=4 SV=1	0	37.372	11	5	15	5	559	62	5.26	58	19.76	5	5		cytoplasm	protein binding	Pf00787, Pf03114, Pf09325	106376286	GSBRNA2T00020928001	LOC106376286	C9		0	0	5.67117e+06	5.79654e+06	5.23446e+06	5.46747e+06	6.23844e+06	6.7127e+06	High	High	High	High	High	High	1
High	Master Protein	A0A078FRW6	Tryptophan synthase OS=Brassica napus OX=3708 GN=BnaA10g09090D PE=3 SV=1	0	37.353	17	7	24	3	465	50.5	6.9	85	27.67	6	6	metabolic process		catalytic activity	Pf00291		GSBRNA2T00095360001				0	4	6.74917e+06	7.28008e+06	5.95098e+06	6.04395e+06	7.19606e+06	7.23642e+06	High	High	High	High	High	High	1
High	Master Protein	A0A078HAN4	Alkaline/neutral invertase OS=Brassica napus OX=3708 GN=BnaA09g41790D PE=3 SV=1	0	37.317	12	6	19	5	568	64.7	6.54	79	24.09	6	6			catalytic activity	Pf12899		GSBRNA2T00057365001				0	1	6.88928e+06	6.51687e+06	5.92487e+06	6.47476e+06	6.73691e+06	7.59703e+06	High	High	High	High	High	High	1
High	Master Protein	A0A078FVH6	BnaC06g00020D protein OS=Brassica napus OX=3708 GN=BnaC06g00020D PE=3 SV=1	0	37.246	11	10	19	10	885	99.7	5.74	55	19.77	9	10	transport			Pf04129, Pf09763, Pf15277	106406023	GSBRNA2T00095058001	LOC106406023	C6		0	0	2.9597e+06	3.3564e+06	2.83993e+06	3.15299e+06	3.38233e+06	3.80716e+06	High	High	High	High	High	High	1
High	Master Protein	A0A078F1S8	Sinigrinase OS=Brassica napus OX=3708 GN=BnaA07g24400D PE=3 SV=1	0	37.215	14	8	38	5	538	61.5	8.72	134	30.21	8	5	metabolic process		catalytic activity	Pf00232		GSBRNA2T00124323001				0	1	2.44711e+07	2.6295e+07	2.5449e+07	3.08563e+07	2.94686e+07	3.111e+07	High	High	High	High	High	High	1
High	Master Protein	A0A078F4Z4	BnaA05g27170D protein OS=Brassica napus OX=3708 GN=BnaA05g27170D PE=4 SV=1	0	37.193	25	4	22	4	200	21.4	5.97	95	29.51	4	3	response to stimulus			Pf00582		GSBRNA2T00000249001; GSBRNA2T00088422001				0	0	4.33314e+06	4.77926e+06	3.89901e+06	4.12148e+06	5.64239e+06	5.5698e+06	High	High	High	High	High	High	1
High	Master Protein	A0A078G1Y5	Pre-mRNA-processing factor 19 OS=Brassica napus OX=3708 GN=BnaC04g11150D PE=3 SV=1	0	37.172	14	5	15	2	609	65.9	6.95	59	22.44	5	5	metabolic process		catalytic activity;metal ion binding;protein binding	Pf00400, Pf08606, Pf11789		GSBRNA2T00009080001				0	3	1.63685e+06	1.61157e+06	1.4059e+06	1.3385e+06	1.61301e+06	1.68568e+06	High	High	High	High	High	High	1
High	Master Protein	A0A078J5J3	Sinigrinase OS=Brassica napus OX=3708 GN=BnaC01g43700D PE=3 SV=1	0	37.062	13	6	20	6	528	60.2	6.87	60	23.23	6	6	metabolic process		catalytic activity	Pf00232		GSBRNA2T00027371001				0	0	3.78481e+06	4.06584e+06	4.07106e+06	4.65598e+06	4.51167e+06	4.96255e+06	High	High	High	High	High	High	1
High	Master Protein	A0A078I5M1	BnaC07g24760D protein OS=Brassica napus OX=3708 GN=BnaC07g24760D PE=3 SV=1	0	37.047	22	4	24	4	191	20	6.21	102	30.28	4	4	metabolic process	ribosome	structural molecule activity	Pf00542		GSBRNA2T00080135001				0	0	2.29298e+07	2.46115e+07	2.13302e+07	2.11821e+07	2.9758e+07	2.97186e+07	High	High	High	High	High	High	1
High	Master Protein	A0A078GCF0	BnaA06g36950D protein OS=Brassica napus OX=3708 GN=BnaA06g36950D PE=3 SV=1	0	37.013	20	8	28	1	399	44.7	8.18	71	28.76	8	7	metabolic process;regulation of biological process;response to stimulus	cytoplasm	catalytic activity;nucleotide binding;protein binding;RNA binding	Pf00004, Pf00006, Pf00158, Pf00910, Pf01057, Pf01078, Pf05496, Pf06068, Pf07724, Pf07726, Pf07728, Pf13191, Pf13401	106349542	GSBRNA2T00018857001	LOC106349542	A6	Proteasome	1	8	8.12474e+06	8.2506e+06	6.85852e+06	6.97505e+06	8.47846e+06	9.02097e+06	High	High	High	High	High	High	1
High	Master Protein	A0A078IKQ3	Aspartokinase OS=Brassica napus OX=3708 GN=BnaCnng21170D PE=3 SV=1	0	36.946	11	8	20	7	911	99	7.21	54	15.93	8	6	metabolic process		catalytic activity;nucleotide binding	Pf00696, Pf00742, Pf01842, Pf03447, Pf13840	106366709	GSBRNA2T00003861001	LOC106366709		Biosynthesis of amino acids; Lysine biosynthesis; Metabolic pathways; Monobactam biosynthesis; Glycine, serine and threonine metabolism; Biosynthesis of secondary metabolites; Cysteine and methionine metabolism	7	0	8.38076e+06	8.06976e+06	7.09388e+06	8.00017e+06	8.83972e+06	9.8266e+06	High	High	High	High	High	High	1
High	Master Protein	A0A078F3C1	Glutamate decarboxylase OS=Brassica napus OX=3708 GN=BnaA07g25530D PE=3 SV=1	0	36.929	13	5	22	2	494	56.1	5.63	102	30.62	5	5	metabolic process		catalytic activity	Pf00266, Pf00282		GSBRNA2T00124474001				0	3	3.67024e+06	3.90622e+06	3.5985e+06	4.13162e+06	4.56241e+06	4.70046e+06	High	High	High	High	High	High	1
High	Master Protein	A0A078GJA9	Dirigent protein OS=Brassica napus OX=3708 GN=BnaA02g21790D PE=3 SV=1	0	36.901	20	2	10	2	187	21.2	8.38	57	18.22	2	2		extracellular	catalytic activity	Pf03018		GSBRNA2T00029336001				0	0	1.07076e+06	1.12638e+06	1.00334e+06	1.02131e+06	1.13541e+06	1.12593e+06	High	High	High	High	High	High	1
High	Master Protein	A0A078HD66	BnaA01g30930D protein OS=Brassica napus OX=3708 GN=BnaA01g30930D PE=4 SV=1	0	36.886	7	7	17	7	1187	131.7	5.44	61	18.7	7	6		nucleus	protein binding	Pf03178, Pf10433		GSBRNA2T00060302001				0	0	3.48928e+06	3.58242e+06	2.95929e+06	3.38636e+06	3.74017e+06	4.14626e+06	High	High	High	High	High	High	1
High	Master Protein	A0A078D4W3	BnaC03g40740D protein OS=Brassica napus OX=3708 GN=BnaC03g40740D PE=3 SV=1	0	36.855	16	4	15	4	353	40.5	5.97	58	23.22	4	4	metabolic process		catalytic activity;metal ion binding	Pf03171, Pf14226	106381238; 106381239; 106451894	GSBRNA2T00137433001; GSBRNA2T00021427001	LOC106381238; LOC106381239; LOC106451894	C3; A2		0	0	1.06365e+06	1.09072e+06	966725	1.24767e+06	1.32683e+06	1.51298e+06	High	High	High	High	High	High	1
High	Master Protein	A0A078IAU5	BnaA02g32800D protein OS=Brassica napus OX=3708 GN=BnaA02g32800D PE=3 SV=1	0	36.812	7	7	15	7	1177	130.5	8.56	60	13.98	7	6	transport	membrane	catalytic activity;metal ion binding;nucleotide binding;transporter activity	Pf00122, Pf13246		GSBRNA2T00086450001				0	0	5.25224e+06	5.46168e+06	4.77926e+06	5.21944e+06	5.91481e+06	6.36203e+06	High	High	High	High	High	High	1
High	Master Protein	A0A078GIL3	BnaC02g30020D protein OS=Brassica napus OX=3708 GN=BnaC02g30020D PE=3 SV=1	0	36.787	20	8	28	1	399	44.8	7.87	72	28.59	8	7	metabolic process;regulation of biological process;response to stimulus	cytoplasm	catalytic activity;nucleotide binding;protein binding;RNA binding	Pf00004, Pf00006, Pf00158, Pf00910, Pf01057, Pf01078, Pf05496, Pf06068, Pf07724, Pf07726, Pf07728, Pf13191, Pf13401		GSBRNA2T00029207001				0	0							High	High	High	High	High	High	1
High	Master Protein	A0A078GEM2	BnaC04g02110D protein OS=Brassica napus OX=3708 GN=BnaC04g02110D PE=4 SV=1	0	36.782	10	7	15	3	973	107.1	5.21	78	18.44	7	4	cell organization and biogenesis		protein binding	Pf00626, Pf02209	106396172	GSBRNA2T00024238001	LOC106396172	C4		0	3	944823	979214	772771	863098	990376	1.05956e+06	High	High	High	High	High	High	1
High	Master Protein	A0A078HC11	BnaA04g15300D protein OS=Brassica napus OX=3708 GN=BnaA04g15300D PE=4 SV=1	0	36.698	19	5	24	3	339	35.8	6.71	77	30.18	5	5			RNA binding	Pf00013, Pf07650, Pf13014		GSBRNA2T00058283001				0	2	3.16124e+06	3.27918e+06	2.62813e+06	2.73182e+06	3.20183e+06	3.46315e+06	High	High	High	High	High	High	1
High	Master Protein	A0A078HJ58	BnaA04g19620D protein OS=Brassica napus OX=3708 GN=BnaA04g19620D PE=4 SV=1	0	36.694	13	4	19	4	321	35.6	6.68	82	29.04	4	4	metabolic process		catalytic activity	Pf01073, Pf01370, Pf02719, Pf07993, Pf08659, Pf13460		GSBRNA2T00064606001				0	0	6.19931e+06	6.79168e+06	5725717	6.29855e+06	7.01051e+06	7.87705e+06	High	High	High	High	High	High	1
High	Master Protein	A0A078GRD8	BnaA05g31780D protein OS=Brassica napus OX=3708 GN=BnaA05g31780D PE=3 SV=1	0	36.653	11	7	24	2	666	73	5.3	81	26.99	7	6			protein binding	Pf00887, Pf01344, Pf07646, Pf13415, Pf13418, Pf13854, Pf13964		GSBRNA2T00038575001				0	5	4.24247e+06	4.11591e+06	3.39566e+06	3.37971e+06	4.08324e+06	4.17582e+06	High	High	High	High	High	High	1
High	Master Protein	A0A078CXX6	BnaA09g45430D protein OS=Brassica napus OX=3708 GN=BnaA09g45430D PE=3 SV=1	0	36.617	13	7	20	1	614	68.7	7.78	59	27.18	7	7			catalytic activity;nucleotide binding	Pf00350, Pf01031, Pf02212	106415953; 106434674	GSBRNA2T00055149001; GSBRNA2T00136595001	LOC106415953; LOC106434674	C8; A9		0	5	4.45831e+06	4.32788e+06	3.87493e+06	3.91791e+06	4.6818e+06	4.78218e+06	High	High	High	High	High	High	1
High	Master Protein	A0A078I607	Glutamine amidotransferase OS=Brassica napus OX=3708 GN=BnaA09g12410D PE=3 SV=1	0	36.61	13	6	14	1	530	58.9	6.57	53	20.68	6	6	metabolic process		catalytic activity;nucleotide binding	Pf00117, Pf00733, Pf00958, Pf03054		GSBRNA2T00081839001				0	0	1081322	1.08981e+06	885903	870425	1013806	986892	High	High	High	High	High	High	1
High	Master Protein	A0A078HA77	BnaA04g14820D protein OS=Brassica napus OX=3708 GN=BnaA04g14820D PE=3 SV=1	0	36.564	15	4	12	1	291	32.7	7.21	54	19.44	4	4				Pf01875		GSBRNA2T00058341001				0	0	2.09869e+06	1.8758e+06	1446116	1.73967e+06	2.0184e+06	2.24903e+06	High	High	High	High	High	High	1
High	Master Protein	A0A078F8Q4	BnaA06g15930D protein OS=Brassica napus OX=3708 GN=BnaA06g15930D PE=4 SV=1	0	36.554	25	7	29	5	289	32.2	10.2	106	32.24	7	6			RNA binding	Pf00076, Pf13893, Pf14259		GSBRNA2T00125424001				0	2	1.18909e+07	1.29209e+07	1.07714e+07	9.63505e+06	1.17262e+07	1.37438e+07	High	High	High	High	High	High	1
High	Master Protein	G4XUQ6	Phospholipase D (Fragment) OS=Brassica napus OX=3708 PE=2 SV=1	0	36.499	10	5	15	1	529	60.5	7.03	58	19.07	5	5			catalytic activity	Pf00614, Pf12357, Pf13091	106351615		LOC106351615	C1		0	0							High	High	High	High	High	High	1
High	Master Protein	A0A078FUH4	BnaA08g02800D protein OS=Brassica napus OX=3708 GN=BnaA08g02800D PE=4 SV=1	0	36.468	24	4	19	4	206	23.1	5.2	89	30.16	4	4	regulation of biological process;response to stimulus		catalytic activity;nucleotide binding	Pf00025, Pf00071, Pf01926, Pf04670, Pf08477	106434799; 106434800	GSBRNA2T00091078001	LOC106434799; LOC106434800	A8		0	0	1.18423e+07	1.32137e+07	1.08769e+07	1.1128e+07	1.23472e+07	1.28768e+07	High	High	High	High	High	High	1
High	Master Protein	A0A078FXM1	Cysteine synthase OS=Brassica napus OX=3708 GN=BnaC04g03050D PE=3 SV=1	0	36.467	14	4	21	2	392	41.6	7.96	81	30.14	4	3	metabolic process		catalytic activity	Pf00291	106447111	GSBRNA2T00002261001	LOC106447111	C4	Sulfur metabolism; Metabolic pathways; Carbon metabolism; Biosynthesis of secondary metabolites; Cysteine and methionine metabolism; Biosynthesis of amino acids	6	2	6.33571e+06	6.95075e+06	5.30506e+06	6.73932e+06	7.47477e+06	7.48803e+06	High	High	High	High	High	High	1
High	Master Protein	A0A078GUE4	Inositol-1-monophosphatase OS=Brassica napus OX=3708 GN=BnaCnng06030D PE=3 SV=1	0	36.458	15	5	14	5	271	29	5.25	58	18.58	5	5	metabolic process		catalytic activity;metal ion binding	Pf00459		GSBRNA2T00041354001				0	0	1.51057e+07	1.65754e+07	1.23909e+07	12913951	1.5348e+07	1.56496e+07	High	High	High	High	High	High	1
High	Master Protein	A0A078HZI0	BnaA05g26050D protein OS=Brassica napus OX=3708 GN=BnaA05g26050D PE=3 SV=1	0	36.429	8	9	17	2	1239	134.8	6.07	56	14.29	9	8			protein binding	Pf00400		GSBRNA2T00079411001				0	7	6.49775e+06	6.83841e+06	6.03201e+06	6.19481e+06	7.01372e+06	7.70173e+06	High	High	High	High	High	High	1
High	Master Protein	A0A078JJL2	BnaC02g47720D protein OS=Brassica napus OX=3708 GN=BnaC02g47720D PE=4 SV=1	0	36.397	13	4	11	4	306	33.8	6.77	65	12.84	4	3				Pf00226		GSBRNA2T00055482001				0	0	3.62e+06	4.02878e+06	3.24697e+06	3.41713e+06	3.92124e+06	4.31532e+06	High	High	High	High	High	High	1
High	Master Protein	A0A078H9M1	BnaC01g21820D protein OS=Brassica napus OX=3708 GN=BnaC01g21820D PE=3 SV=1	0	36.391	5	10	22	10	1888	213	6.2	61	23.67	10	10	regulation of biological process;response to stimulus			Pf06920, Pf14429		GSBRNA2T00056544001				0	0	1860210	1.95633e+06	1.72161e+06	1.91345e+06	2.05798e+06	2.23104e+06	High	High	High	High	High	High	1
[truncated: 4,085 more rows]

## Sheet: Quantified_Proteins
Accession	Ratio	p_value	adjust_p_value	Description
[truncated: 4,638 more rows]

## Sheet: Differentially_Accumulated_Prot
Accession	Ratio (HOCL/LOCL)	p_value	adjust_p_value	Description
[truncated: 342 more rows]
