# Supplementary material for: Tandem Mass Tag-Based Quantitative Proteomics Reveals Implication of a Late Embryogenesis Abundant Protein (BnLEA57) in Seed Oil Accumulation in Brassica napus L
Source: Front Plant Sci. 2022 Jun 2;13:907244. doi: 10.3389/fpls.2022.907244 (PMC9201403; doi:10.3389/fpls.2022.907244)
Supplement: Supplementary Table 2 — Functional protein groups identified by GO enrichment analysis of DAPs between HOCL and LOCL seed proteome. [file Table_2.XLSX]

## Sheet: GO_BP_total_differenitally
ID	Description	GeneRatio	BgRatio	pvalue	p.adjust	qvalue	geneID	Count
GO:0044255	cellular lipid metabolic process	19/185	147/2916	0.00191369	0.289924	0.288061	A0A078E790/A0A078FHD7/A0A078FQL5/A0A078FXF0/A0A078G4T7/A0A078GDQ4/A0A078HJT1/A0A078HL12/A0A078HM31/A0A078HTG3/A0A078HTK0/A0A078HX24/A0A078I1J8/A0A078IU40/A0A078JFC7/A0A0K0K5D2/G4WXD9/P10352/Q8GV01	19
GO:0008610	lipid biosynthetic process	17/185	116/2916	0.000810733	0.289924	0.288061	A0A078E790/A0A078FHD7/A0A078FXF0/A0A078G4T7/A0A078GDQ4/A0A078HJT1/A0A078HL12/A0A078HTG3/A0A078HTK0/A0A078HX24/A0A078I1J8/A0A078IU40/A0A078JFC7/A0A0K0K5D2/G4WXD9/P10352/Q8GV01	17
GO:0042545	cell wall modification	5/185	15/2916	0.00173354	0.289924	0.288061	A0A078G0C6/A0A078G8J6/A0A078G8U0/A0A078GRZ7/A0A078HRF0	5
GO:0045490	pectin catabolic process	5/185	15/2916	0.00173354	0.289924	0.288061	A0A078G0C6/A0A078G8J6/A0A078G8U0/A0A078GRZ7/A0A078HRF0	5
GO:0015979	photosynthesis	11/185	71/2916	0.00443935	0.320064	0.318007	A0A075M3Q5/A0A078F3B2/A0A078HMF9/A0A078HR87/A0A078IAV5/A0A078IFG6/A0A078J8I6/A0A078JXE7/A0A078JZM9/D1L8Q5/Q71SX0	11
GO:0000272	polysaccharide catabolic process	7/185	32/2916	0.00319565	0.320064	0.318007	A0A078G0C6/A0A078G8J6/A0A078G8U0/A0A078GBI0/A0A078GRZ7/A0A078HRF0/A0A078ITV4	7
GO:0008299	isoprenoid biosynthetic process	6/185	26/2916	0.00475343	0.320064	0.318007	A0A078FXF0/A0A078HL12/A0A078HTK0/A0A078IU40/A0A078JFC7/A0A0K0K5D2	6
GO:0010393	galacturonan metabolic process	5/185	18/2916	0.00423046	0.320064	0.318007	A0A078G0C6/A0A078G8J6/A0A078G8U0/A0A078GRZ7/A0A078HRF0	5
GO:0045488	pectin metabolic process	5/185	18/2916	0.00423046	0.320064	0.318007	A0A078G0C6/A0A078G8J6/A0A078G8U0/A0A078GRZ7/A0A078HRF0	5
GO:0006720	isoprenoid metabolic process	6/185	27/2916	0.00579576	0.351223	0.348966	A0A078FXF0/A0A078HL12/A0A078HTK0/A0A078IU40/A0A078JFC7/A0A0K0K5D2	6
GO:0050896	response to stimulus	33/185	346/2916	0.00892057	0.401475	0.398894	A0A078F3B2/A0A078F5L1/A0A078F5L4/A0A078F5R0/A0A078FDM3/A0A078FL38/A0A078FSR3/A0A078G1F3/A0A078G998/A0A078GK30/A0A078GLK2/A0A078GX15/A0A078GYL8/A0A078HG51/A0A078HHH4/A0A078HL12/A0A078HT58/A0A078HTD5/A0A078HTP0/A0A078I2X6/A0A078IH01/A0A078IIH2/A0A078IQJ7/A0A078ISG2/A0A078IT49/A0A078IWH8/A0A078J8I6/A0A078JBL3/A0A078JFT9/A0A078JRE3/A0A078JZ92/A0A078K329/Q2MD61	33
GO:0046394	carboxylic acid biosynthetic process	22/185	204/2916	0.00839782	0.401475	0.398894	A0A078E790/A0A078F5V2/A0A078F9P1/A0A078FHD7/A0A078FXH9/A0A078G4T7/A0A078GRS1/A0A078HH16/A0A078HJT1/A0A078HLJ2/A0A078HPK5/A0A078HRR3/A0A078HVZ2/A0A078I1J8/A0A078IBR2/A0A078IU40/A0A078J6H2/A0A078JDW4/A0A078JMV8/G4WXD9/P10352/Q8GV01	22
GO:0016053	organic acid biosynthetic process	22/185	207/2916	0.00993749	0.401475	0.398894	A0A078E790/A0A078F5V2/A0A078F9P1/A0A078FHD7/A0A078FXH9/A0A078G4T7/A0A078GRS1/A0A078HH16/A0A078HJT1/A0A078HLJ2/A0A078HPK5/A0A078HRR3/A0A078HVZ2/A0A078I1J8/A0A078IBR2/A0A078IU40/A0A078J6H2/A0A078JDW4/A0A078JMV8/G4WXD9/P10352/Q8GV01	22
GO:0006629	lipid metabolic process	21/185	193/2916	0.00903221	0.401475	0.398894	A0A078E790/A0A078FHD7/A0A078FQL5/A0A078FXF0/A0A078G4T7/A0A078GDQ4/A0A078GJV0/A0A078HDF4/A0A078HJT1/A0A078HL12/A0A078HM31/A0A078HTG3/A0A078HTK0/A0A078HX24/A0A078I1J8/A0A078IU40/A0A078JFC7/A0A0K0K5D2/G4WXD9/P10352/Q8GV01	21
GO:0071554	cell wall organization or biogenesis	8/185	48/2916	0.00948508	0.401475	0.398894	A0A078G0C6/A0A078G8J6/A0A078G8U0/A0A078GRZ7/A0A078H653/A0A078HRF0/A0A078ITV4/A0A078J4F0	8

## Sheet: GO_CC_total_differenitally
ID	Description	GeneRatio	BgRatio	pvalue	p.adjust	qvalue	geneID	Count
GO:0009535	chloroplast thylakoid membrane	13/202	62/3169	0.00010011	0.00855942	0.00816688	D1L8Q5/A0A078JXE7/A0A078IFG6/A0A078HEC4/A0A078IAV5/A0A078J8I6/A0A078HP42/A0A078HMR6/A0A078HR87/D1L8M4/A0A078IXX3/A0A078HMF9/A0A078F3B2	13
GO:0055035	plastid thylakoid membrane	13/202	62/3169	0.00010011	0.00855942	0.00816688	D1L8Q5/A0A078JXE7/A0A078IFG6/A0A078HEC4/A0A078IAV5/A0A078J8I6/A0A078HP42/A0A078HMR6/A0A078HR87/D1L8M4/A0A078IXX3/A0A078HMF9/A0A078F3B2	13
GO:0042651	thylakoid membrane	13/202	77/3169	0.000942669	0.0388559	0.0370739	D1L8Q5/A0A078JXE7/A0A078IFG6/A0A078HEC4/A0A078IAV5/A0A078J8I6/A0A078HP42/A0A078HMR6/A0A078HR87/D1L8M4/A0A078IXX3/A0A078HMF9/A0A078F3B2	13
GO:0034357	photosynthetic membrane	13/202	78/3169	0.00106871	0.0388559	0.0370739	D1L8Q5/A0A078JXE7/A0A078IFG6/A0A078HEC4/A0A078IAV5/A0A078J8I6/A0A078HP42/A0A078HMR6/A0A078HR87/D1L8M4/A0A078IXX3/A0A078HMF9/A0A078F3B2	13
GO:0009534	chloroplast thylakoid	13/202	80/3169	0.00136336	0.0388559	0.0370739	D1L8Q5/A0A078JXE7/A0A078IFG6/A0A078HEC4/A0A078IAV5/A0A078J8I6/A0A078HP42/A0A078HMR6/A0A078HR87/D1L8M4/A0A078IXX3/A0A078HMF9/A0A078F3B2	13
GO:0031976	plastid thylakoid	13/202	80/3169	0.00136336	0.0388559	0.0370739	D1L8Q5/A0A078JXE7/A0A078IFG6/A0A078HEC4/A0A078IAV5/A0A078J8I6/A0A078HP42/A0A078HMR6/A0A078HR87/D1L8M4/A0A078IXX3/A0A078HMF9/A0A078F3B2	13
GO:0005576	extracellular region	18/202	133/3169	0.00160164	0.0391259	0.0373316	Q2MD61/A0A078IG99/A0A078FSV0/A0A078G1F3/A0A078H673/A0A078HGM0/A0A078FNY0/A0A078GK30/A0A078FGJ4/A0A078GYJ4/A0A078F5L4/A0A078HT58/A0A078J4F0/A0A078ITV4/A0A078I5K0/A0A078IRK4/A0A078JZ92/A0A078GRW5	18

## Sheet: GO_MF_total_differenitally
ID	Description	GeneRatio	BgRatio	pvalue	p.adjust	qvalue	geneID	Count
GO:0045735	nutrient reservoir activity	12/237	23/3495	4.99285e-09	1.26818e-06	1.26661e-06	A0A078K0Y7/A0A078IBF3/Q39344/P17333/A0A078GA98/P33524/A0A078GXC5/Q7XB53/A0A078FMD5/P01090/Q9S9E6/A0A078FMU9	12
GO:0004857	enzyme inhibitor activity	9/237	37/3495	0.000603914	0.0383486	0.0383009	A0A078G8J6/A0A078I3E7/A0A078IMU3/A0A078K0U4/A0A078GRZ7/A0A078HRF0/A0A078G0C6/A0A078G8U0/A0A078FDP5	9
GO:0046910	pectinesterase inhibitor activity	6/237	16/3495	0.000410198	0.0383486	0.0383009	A0A078G8J6/A0A078K0U4/A0A078GRZ7/A0A078HRF0/A0A078G0C6/A0A078G8U0	6
GO:0030599	pectinesterase activity	6/237	17/3495	0.000598354	0.0383486	0.0383009	A0A078G8J6/A0A078K0U4/A0A078GRZ7/A0A078HRF0/A0A078G0C6/A0A078G8U0	6
